# Supplementary material for: Sex- and stage-dependent expression patterns of odorant-binding and chemosensory protein genes in Spodoptera exempta
Source: PeerJ. 2021 Sep 13;9:e12132. doi: 10.7717/peerj.12132 (PMC8445084; doi:10.7717/peerj.12132)
Supplement: Supplemental Information 8 [file peerj-09-12132-s008.docx]

Table S5 Conserved C-Pattern in OBPs of *S. exempta*

| Gene Name | C-Pattern |
| --- | --- |
| SexeOBP1 | C1-X26-C2-X3-C3-X40-C4-X10-C5-X8-C6 |
| SexeOBP2 | C1-X26-C2-X3-C3-X40-C4-X10-C5-X8-C6 |
| SexeOBP4 | C1-X26-C2-X3-C3-X40-C4-X10-C5-X8-C6 |
| SexeOBP5 | C1-X27-C2-X3-C3-X42-C4-X14-C5-X8-C6 |
| SexeOBP6 | C1-X24-C2-X3-C3-X45-C4-X15-C5-X8-C6 |
| SexeOBP7 | C1-X26-C2-X3-C3-X43-C4-X14-C5-X8-C6 |
| SexeOBP8 | C1-X26-C2-X3-C3-X43-C4-X14-C5-X8-C6 |
| SexeOBP9 | C1-X29-C2-X3-C3-X42-C4-X9-C5-X8-C6 |
| SexeOBP11 | C1-X26-C2-X3-C3-X40-C4-X10-C5-X8-C6 |
| SexeOBP13 | C1-X25-C2-X3-C3-X40-C4-X14-C5-X8-C6 |
| SexeOBP14 | C1-X26-C2-X3-C3-X40-C4-X14-C5-X8-C6 |
| SexeOBP16 | C1-X25-C2-X3-C3-X39-C4-X14-C5-X8-C6 |
| SexeOBP17 | C1-X26-C2-X3-C3-X41-C4-X14-C5-X8-C6 |
| SexeOBP20 | C1-X26-C2-X3-C3-X37-C4-X10-C5-X8-C6 |
| SexeOBP21 | C1-X26-C2-X3-C3-X42-C4-X14-C5-X8-C6 |
| SexeOBP22 | C1-X26-C2-X3-C3-X41-C4-X10-C5-X8-C6 |
| SexeOBP23 | C1-X19-C2-X3-C3-X41-C4-X13-C5-X8-C6 |
| SexeOBP24 | C1-X25-C2-X3-C3-X41-C4-X13-C5-X8-C6 |
| SexeOBP27 | C1-X26-C2-X3-C3-X43-C4-X13-C5-X8-C6 |
| SexeOBP31 | C1-X26-C2-X3-C3-X42-C4-X10-C5-X8-C6 |
| SexeOBP32 | C1-X26-C2-X3-C3-X42-C4-X10-C5-X8-C6 |
| SexeOBP33 | C1-X25-C2-X3-C3-X42-C4-X11-C5-X8-C6 |
| SexeOBP35 | C1-X26-C2-X3-C3-X42-C4-X10-C5-X8-C6 |
| SexeOBP36 | C1-X26-C2-X3-C3-X42-C4-X10-C5-X8-C6 |
| SexeOBP3 | C1-X28-C3-X39-C4-X17- C6 |
| SexeOBP12 | C1-X34-C3-X36-C4-X17- C6 |
| SexeOBP18 | C1-X31-C3-X36-C4-X17- C6 |
| SexeOBP19 | C1-X30-C3-X36-C4-X17- C6 |
| SexeOBP30 | C1-X30-C3-X38-C4-X17- C6 |
| SexeOBP34 | C1-X30-C3-X39-C4-X17- C6 |
