# Supplementary material for: Sex- and stage-dependent expression patterns of odorant-binding and chemosensory protein genes in Spodoptera exempta
Source: PeerJ. 2021 Sep 13;9:e12132. doi: 10.7717/peerj.12132 (PMC8445084; doi:10.7717/peerj.12132)
Supplement: Supplemental Information 9 [file peerj-09-12132-s009.docx]

Table S6 GenBank accession numbers of insect CSP genes used in the phylogenetic analysis

| **Species** | **Gene name** | **Acc. no.** |
| --- | --- | --- |
| *Bombyx mori* | BmorCSP1 | ABH88194 |
| BmorCSP2 | ABH88195 |
| BmorCSP3 | ABH88196 |
| BmorCSP4 | ABH88197 |
| BmorCSP5 | ABH88198 |
| BmorCSP6 | ABH88199 |
| BmorCSP7 | ABH88200 |
| BmorCSP8 | ABH88201 |
| BmorCSP9 | ABH88202 |
| BmorCSP10 | ABH88203 |
| BmorCSP11 | ABH88204 |
| BmorCSP12 | ABH88205 |
| BmorCSP13 | ABH88206 |
| BmorCSP14 | ABH88207 |
| BmorCSP15 | ABH88208 |
| BmorCSP16 | ABH88209 |
| *Plutella xylostella* | PxylCSP1 | Yang et al. (2017) Scientific Reports 7: 11941 |
| PxylCSP2 |
| PxylCSP3 |
| PxylCSP4 |
| PxylCSP5 |
| PxylCSP6 |
| PxylCSP7 |
| PxylCSP8 |
| PxylCSP9 |
| PxylCSP10 |
| PxylCSP11 |
| PxylCSP12 |
| PxylCSP13 |
| PxylCSP14 |
| PxylCSP15 |
| *Helicoverpa armigera* | HarmCSP | AAK53762 |
| HarmCSP2 | AEX07265 |
| HarmCSP3 | AEX07266 |
| HarmCSP4 | AEX07269 |
| HarmCSP5 | AEB54579 |
| HarmCSP6 | AEX07267 |
| HarmCSP7 | AEX07268 |
| *Papilio xuthus* | PxutCSP1 | AB260116 |
| PxutCSP2 | AB260117 |
| PxutCSP3 | AB260118 |
| PxutCSP4 | AB430771 |
| PxutCSP5 | AB260120 |
| PxutCSP6 | AB260121 |
| PxutCSP7 | AB260122 |
| PxutCSP8 | AB260124 |
| PxutCSP9 | AB260125 |
| PxutCSP10 | AB260126 |
| PxutCSP11 | AB430775 |
| PxutCSP12 | AB430777 |
| PxutCSP13 | AB430778 |
| *Cnaphalocrocis medinalis* | CmedCSP1 | AGI37361 |
| CmedCSP2 | AGI37363 |
| CmedCSP3 | AGI37365 |
| CmedCSP4 | KM365188 |
| CmedCSP5 | KM365189 |
| CmedCSP6 | KM365190 |
| CmedCSP7 | KM365191 |
| CmedCSP8 | KM365192 |
| CmedCSP9 | KM365193 |
| CmedCSP10 | KM365194 |
| CmedCSP11 | KM365195 |
| CmedCSP12 | KM365196 |
| CmedCSP13 | KM365197 |
| CmedCSP14 | KM365198 |
| CmedCSP15 | KM365199 |
| CmedCSP16 | KM365200 |
| CmedCSP17 | KM365201 |
| CmedCSP18 | KM365202 |
| CmedCSP19 | KM365203 |
| CmedCSP20 | KM365204 |
| CmedCSP21 | KM365205 |
| CmedCSP22 | KM365206 |
