# Supplementary material for: Sex- and stage-dependent expression patterns of odorant-binding and chemosensory protein genes in Spodoptera exempta
Source: PeerJ. 2021 Sep 13;9:e12132. doi: 10.7717/peerj.12132 (PMC8445084; doi:10.7717/peerj.12132)
Supplement: Supplemental Information 18 [file peerj-09-12132-s018.xlsx]

## Sheet: DEGs at larval stage
Gene_id	FC(PMF/L)	Log2FC(PMF/L)	Pvalue	Padjust	Significant	Regulate	L	PMF	SEL1	SEL2	SEL3	V1V2SEL4	V1V2SEL5	V1V2SEL6	SEAF19	SEAF20	SEAF21	SEAM13	SEAM14	SEAM15	2021-09-08	2021-09-09	V1V2SEAF22	V1V2SEAF23	V1V2SEAF24	V1V2SEAM16	V1V2SEAM17	V1V2SEAM18	V1V2SEP10	V1V2SEP11	V1V2SEP12	NR description
TRINITY_DN58042_c6_g4	0.0002175	-12.1667	8.66e-33	1.81e-27	yes	down	157.31	0.0647059	160.99	154.07	154.15	178.2	128.76	167.69	0.06	0.08	0.14	0.04	0.05	0.08	0.03	0.03	0.05	0.05	0.07	0.07	0.04	0.14	0.04	0.03	0.1	AAT99437.1(aminopeptidase N [Spodoptera exigua])
TRINITY_DN55839_c1_g1	0.00037031	-11.399	1.4e-31	1.46e-26	yes	down	520.65	0.317059	601.71	476.83	313.56	563.64	602.47	565.69	0.31	0.26	0.54	0.3	0.21	0.14	0.39	0.16	0.22	0.42	0.52	0.37	0.2	0.32	0.31	0.48	0.24	XP_022835594.1(LOW QUALITY PROTEIN: membrane alanyl aminopeptidase-like [Spodoptera litura])
TRINITY_DN60541_c1_g2	0.000552574	-10.8215	1.09e-30	7.62e-26	yes	down	130.257	0.104118	147.4	149.71	91.51	109.19	150.51	133.22	0.08	0.07	0.12	0.09	0.14	0.22	0.05	0.11	0.12	0.09	0.12	0.09	0.07	0.12	0.09	0.12	0.07	XP_022831340.1(gelsolin, cytoplasmic-like [Spodoptera litura])
TRINITY_DN61636_c1_g1	0.000195513	-12.3204	6.01e-29	3.14e-24	yes	down	2662.87	0.821176	2623.07	3623.15	2215.63	2463.65	2173.75	2877.95	0.75	0.51	3.79	0.33	0.37	0.56	0.67	0.68	0.63	0.78	1.03	0.67	0.59	0.42	0.85	0.74	0.59	KOB58171.1(Insect intestinal mucin 4 [Operophtera brumata])
TRINITY_DN53811_c0_g1	0.000300975	-11.6981	1.32e-28	5.51e-24	yes	down	1148.6	0.51	1284.87	1623.42	811.45	1008.29	1308.89	854.7	0.61	0.71	1.19	0.29	0.37	0.24	0.41	0.38	0.39	0.37	0.4	0.25	0.27	0.36	0.42	1.53	0.48	XP_022818055.1(uncharacterized protein LOC111350650 [Spodoptera litura])
TRINITY_DN55866_c1_g1	0.000486203	-11.0062	2.92e-28	1.02e-23	yes	down	300.033	0.264706	339.46	261.59	209.05	247.69	419.01	323.4	0.22	0.26	0.57	0.45	0.34	0.37	0.15	0.28	0.13	0.17	0.38	0.28	0.22	0.22	0.18	0.08	0.2	XP_022825006.1(membrane alanyl aminopeptidase-like [Spodoptera litura])
TRINITY_DN61133_c1_g1	0.000300143	-11.7021	1.4e-27	4.19e-23	yes	down	255.58	0.258235	214.56	214.5	467.86	226.5	174.03	236.03	0.18	0.03	0.24	0.1	0.16	0.14	0.19	0.27	0.17	0.3	0.05	0.12	0.89	0.09	1.25	0.13	0.08	XP_022820326.1(maltase A1-like [Spodoptera litura])
TRINITY_DN53931_c2_g1	0.000230177	-12.085	1.65e-27	4.32e-23	yes	down	7054.24	1.94765	7936.6	8300.01	5401.44	6814.33	6649.35	7223.72	4.39	1.29	5.65	3.15	0.63	0.22	2.92	2.73	0.82	0.46	1.28	1.68	1.32	1.65	2.08	1.53	1.31	XP_022816929.1(calphotin-like [Spodoptera litura])
TRINITY_DN56029_c0_g1	0.000224132	-12.1234	2.08e-27	4.84e-23	yes	down	4356.59	1.38	5326.82	5203.26	2404.8	4209.59	5595.92	3399.16	1.48	0.92	3.95	1.38	0.77	0.48	1.39	0.57	0.78	0.98	0.69	1.61	0.35	0.6	1.06	5.66	0.79	XP_022818055.1(uncharacterized protein LOC111350650 [Spodoptera litura])
TRINITY_DN61602_c1_g1	0.000375749	-11.3779	3.01e-27	6.3e-23	yes	down	1756.45	0.956471	2235.24	1873.24	982.49	2151.67	1921.85	1374.21	0.36	0.69	2.61	0.91	0.4	0.53	0.75	1.72	0.57	1.03	1.39	1.02	0.37	0.59	0.53	1.64	1.15	XP_022824375.1(uncharacterized protein LOC111354946 [Spodoptera litura])
TRINITY_DN61583_c1_g2	0.000256006	-11.9315	5.39e-27	1.03e-22	yes	down	639.825	0.291176	813.69	813.3	560.46	503.01	609	539.49	0.26	0.47	1.18	0.14	0.29	0.12	0.14	0.22	0.34	0.29	0.29	0.32	0.06	0.27	0.14	0.18	0.24	XP_022822428.1(pancreatic triacylglycerol lipase-like [Spodoptera litura])
TRINITY_DN58072_c7_g5	0.00231694	-8.75357	7.79e-27	1.36e-22	yes	down	130.89	0.578824	148.65	168.98	95.01	110.47	124.46	137.77	0.56	0.49	0.82	0.51	0.45	0.29	0.41	0.24	0.91	0.59	0.75	0.68	0.58	0.46	0.46	0.79	0.85	XP_022824726.1(uncharacterized family 31 glucosidase KIAA1161-like [Spodoptera litura])
TRINITY_DN56732_c0_g1	0.000239251	-12.0292	1.46e-26	2.35e-22	yes	down	2140.68	0.745294	3422.65	1628.43	4078.65	2013.29	860.32	840.74	0.98	0.91	2.3	0.6	0.24	0.77	0.35	0.34	0.9	0.84	0.81	0.65	0.63	1.36	0.12	0.38	0.49	XP_022814231.1(larval cuticle protein LCP-14-like [Spodoptera litura])
TRINITY_DN60849_c6_g2	0.00585659	-7.41572	1.81e-26	2.7e-22	yes	down	2869.28	10.3453	3205.58	3396.53	2495.44	2179.3	3807.17	2131.64	12.89	10.17	14.32	4.48	4.36	3.3	8.75	11.32	9.35	11.71	10.94	6.73	5.73	4.74	7.73	29	20.35	XP_013190615.1(PREDICTED: 39S ribosomal protein L36, mitochondrial [Amyelois transitella])
TRINITY_DN57218_c1_g2	0.000233934	-12.0616	2.13e-26	2.97e-22	yes	down	2128.75	0.690588	2480.35	3078.94	2180.57	1713.1	1447.05	1872.51	0.95	0.18	1.9	0.33	0.5	0.9	1.44	0.92	0.35	0.38	0.19	0.3	0.86	0.5	1.02	0.52	0.5	XP_022813970.1(calphotin-like [Spodoptera litura])
TRINITY_DN61367_c1_g1	0.00078311	-10.3185	2.37e-26	3.1e-22	yes	down	2052.94	2.40647	2707.12	2475.93	1732.77	1357.22	1879.67	2164.92	1.75	2.71	1.92	1.18	0.58	1.18	4.37	3.81	3.72	1.11	1.9	2.9	2.07	2.57	2.55	3.75	2.84	XP_022821802.1(pancreatic triacylglycerol lipase-like [Spodoptera litura])
TRINITY_DN55995_c2_g1	0.000390233	-11.3234	2.66e-26	3.27e-22	yes	down	193.422	0.175294	229	198.44	151.46	216.87	179.14	185.62	0.26	0.09	0.22	0.15	0.08	0.11	0.34	0.04	0.28	0.25	0.41	0.09	0.28	0.13	0.12	0.08	0.05	AAK69605.1(aminopeptidase N [Spodoptera litura])
TRINITY_DN55607_c1_g1	0.000332633	-11.5538	3.06e-26	3.56e-22	yes	down	703.957	0.326471	711.97	1070.2	1008.75	656.41	242.18	534.23	0.28	0.13	0.57	0.15	0.22	0.12	0.4	0.75	0.19	0.26	0.29	0.18	0.21	0.25	0.5	0.74	0.31	XP_022818071.1(carboxypeptidase B-like [Spodoptera litura])
TRINITY_DN49663_c0_g2	0.000634557	-10.622	3.68e-26	4.06e-22	yes	down	688.653	0.620588	740.4	844.87	737.91	571.78	502.78	734.18	0.13	0.33	1.11	0.38	0.7	0.59	1.02	0.45	1.1	0.44	1.56	0.44	0.62	0.67	0.39	0.34	0.28	None
TRINITY_DN62195_c0_g1	0.00880213	-6.82793	4.47e-26	4.68e-22	yes	down	5623.27	67.76	6154.6	4090.22	6485.32	6084.8	6317.76	4606.91	37.25	40.94	45.55	84.85	91.41	71.29	120.83	55.44	70.41	62.9	63.07	62.61	93.87	52.02	63	62.02	74.46	XP_022814060.1(cuticle protein CP14.6-like [Spodoptera litura])
TRINITY_DN56544_c3_g1	0.000214878	-12.1842	5.13e-26	5.11e-22	yes	down	1862.93	0.873529	2095.82	2612.21	1546.64	1633.62	1651.67	1637.62	0.57	0.82	2.27	0.08	2.48	0.15	0.49	2.3	0.09	0.46	0.36	1.4	0.43	0.67	0.43	0.76	1.09	XP_022816929.1(calphotin-like [Spodoptera litura])
TRINITY_DN62388_c0_g1	0.000367703	-11.4092	7.27e-26	6.92e-22	yes	down	9283.29	6.81176	9942.63	11464.2	7354.18	7694.65	8583.53	10660.6	2.7	4.95	17.49	3.22	5.24	4.45	9.17	26.03	3.67	4.08	4.91	2.75	2.25	6.86	7.25	4.78	6	XP_022826846.1(brachyurin-like [Spodoptera litura])
TRINITY_DN49523_c0_g1	0.00023753	-12.0396	1.08e-25	9.85e-22	yes	down	324.225	0.106471	179.72	372.15	159.12	293.69	498.37	442.3	0.09	0.19	0.2	0.11	0.07	0.17	0.07	0.06	0.08	0.04	0.2	0	0.04	0.04	0.11	0.26	0.08	ABW98673.1(chitin-binding protein [Spodoptera exigua])
TRINITY_DN55035_c0_g1	0.000198993	-12.295	1.43e-25	1.25e-21	yes	down	315.15	0.111176	406.21	268.42	343.68	303.15	286.88	282.56	0.07	0.44	0.34	0.06	0.12	0.03	0	0.08	0.03	0.03	0.13	0.05	0.06	0.03	0.09	0.12	0.21	XP_022827086.1(transmembrane protease serine 9-like [Spodoptera litura])
TRINITY_DN58011_c1_g1	0.000140746	-12.7946	1.61e-25	1.34e-21	yes	down	504.737	0.0982353	542	366.65	415.68	449.47	557.11	697.51	0.09	0	0.34	0.16	0.08	0.04	0.04	0.07	0.08	0.13	0.13	0.07	0	0.04	0.24	0.04	0.12	XP_022826474.1(collagenase-like [Spodoptera litura])
TRINITY_DN59961_c0_g1	0.000200237	-12.286	3.55e-25	2.86e-21	yes	down	1468.09	0.425882	1690.54	2023.22	970.48	1324.36	1395.15	1404.79	0.4	0.2	1.64	0.08	0.3	0.38	0.49	0.55	0.08	0.13	0.25	0.68	0.31	0.31	0.54	0.74	0.16	XP_022816929.1(calphotin-like [Spodoptera litura])
TRINITY_DN51974_c0_g5	0.000163928	-12.5746	4e-25	3.1e-21	yes	down	152.153	0.0123529	185.17	170.04	107.48	168.95	138.67	142.61	0	0	0	0	0	0	0	0	0	0.21	0	0	0	0	0	0	0	XP_022821672.1(trypsin, alkaline C-like [Spodoptera litura])
TRINITY_DN59452_c4_g2	0.00153355	-9.34891	8.05e-25	6.01e-21	yes	down	322.083	0.814118	428.8	365.72	168.71	341.74	253.8	373.73	0.83	1.77	1.21	0.61	1.16	0.6	0.36	0.49	1.12	1.15	1.46	0.39	0.7	0.84	0.34	0.34	0.47	XP_022815042.1(aminoacylase-1A-like [Spodoptera litura])
TRINITY_DN42260_c2_g1	0.000154591	-12.6593	8.83e-25	6.37e-21	yes	down	667.725	0.127059	789.73	768.08	505.25	821.66	523.81	597.82	0	0.18	0.17	0	0.17	0.15	0	0.15	0.35	0	0	0.3	0	0.17	0	0.35	0.17	XP_022824842.1(chondroitin proteoglycan 2-like [Spodoptera litura])
TRINITY_DN60599_c3_g3	0.000208255	-12.2294	9.89e-25	6.9e-21	yes	down	1373.34	0.520588	1996.04	1031.94	1055.14	915.8	1844.9	1396.2	0.67	0.35	1.8	0.58	0.31	0.83	0.62	0.96	0.28	0.13	1.03	0.43	0	0.25	0.08	0.28	0.25	None
TRINITY_DN60362_c4_g1	0.00149479	-9.38584	1.02e-24	6.86e-21	yes	down	463.425	0.797647	583.25	460.43	316.87	677.91	434.27	307.82	0.13	0.52	0.56	1.14	0.71	1.29	0.53	0.58	2.39	0.72	0.35	0.66	0.32	1.04	0.68	0.84	1.1	XP_022817893.1(uncharacterized protein LOC111350507 [Spodoptera litura])
TRINITY_DN57305_c0_g1	0.000541809	-10.8499	1.08e-24	7.06e-21	yes	down	467.725	0.512353	454.77	373.95	731.5	519.55	447.14	279.44	0.1	0.24	0.58	0.19	0.69	0.25	0.92	1.3	0.33	0.39	0.41	0.16	0.56	0.46	0.58	0.69	0.86	XP_022816614.1(endocuticle structural glycoprotein SgAbd-5-like [Spodoptera litura])
TRINITY_DN57730_c3_g1	0.00429236	-7.86401	1.77e-24	1.12e-20	yes	down	1469	9.22	1540.47	1402.65	1611.19	1371.73	1323.11	1564.85	14.13	18.95	10.9	6.36	6.76	4.72	9.11	5.34	6.57	5.91	15.59	5.66	7.75	6.7	3.61	22.01	6.67	XP_022831666.1(fatty acid-binding protein 1-like [Spodoptera litura])
TRINITY_DN52938_c1_g1	0.000298234	-11.7113	1.8e-24	1.11e-20	yes	down	2512.28	0.995294	2364.37	2396.61	3326.1	2216.25	1872.18	2898.14	1.03	0.24	0.71	0.67	0.23	0.82	3.5	2.12	0.48	0.79	0.77	0.2	0.71	0.91	1.17	1.44	1.13	XP_022831896.1(fatty acid-binding protein 2-like [Spodoptera litura])
TRINITY_DN54423_c0_g1	0.000217657	-12.1657	1.81e-24	1.08e-20	yes	down	857.295	0.317059	1169.45	827.21	424.76	895.39	1125.7	701.26	0.26	0.07	1.24	0.35	0.4	0.23	0.19	0.12	0.1	0.22	0.21	0.54	0.13	0.13	0.13	0.87	0.2	ANC90402.1(polycalin [Spodoptera exigua])
TRINITY_DN51925_c0_g2	0.000176326	-12.4695	2.31e-24	1.34e-20	yes	down	565.238	0.159412	704.91	706.89	501.55	523.42	534.62	420.04	0.03	0.1	0.78	0.2	0.07	0.11	0.09	0.06	0.2	0.08	0.1	0.06	0.05	0.19	0.1	0.27	0.22	XP_023939296.1(36.4 kDa proline-rich protein-like [Bicyclus anynana])
TRINITY_DN51430_c0_g1	0.000136603	-12.8377	3.24e-24	1.83e-20	yes	down	979.362	0.180588	1177.78	572.29	913.6	1271.5	1084.74	856.26	0	0.11	0.22	0.1	0	0.1	0.41	0.1	0.11	0.36	0.12	0.19	0	0	0.32	0.61	0.32	XP_022831879.1(uncharacterized protein LOC111360237 [Spodoptera litura])
TRINITY_DN61516_c0_g4	0.000271125	-11.8488	4.25e-24	2.34e-20	yes	down	119.052	0.0482353	127.07	121.28	105.48	100.5	138.28	121.7	0.08	0.04	0.06	0.07	0.13	0.05	0.05	0.09	0	0.04	0	0.06	0.06	0.06	0	0	0.03	XP_022815520.1(trypsin, alkaline C-like [Spodoptera litura])
TRINITY_DN53509_c0_g1	0.00330742	-8.24008	7.34e-24	3.94e-20	yes	down	49.6033	0.240588	50.97	53.71	44.18	45.7	50.67	52.39	0.17	0.45	0.72	0.21	0.12	0.11	0.17	0.27	0.27	0.12	0.25	0.26	0.11	0.32	0.21	0.22	0.11	XP_022829393.1(juvenile hormone esterase-like [Spodoptera litura])
TRINITY_DN55962_c0_g1	0.000754413	-10.3724	7.71e-24	4.03e-20	yes	down	286.732	0.354706	333.25	191.46	143.32	382.17	316.63	353.56	0.1	0.21	0.39	0.12	0.18	0.28	1.23	0.47	0.27	0.44	0.36	0.43	0.3	0.41	0.27	0.39	0.18	XP_022828655.1(uncharacterized protein LOC111358014 [Spodoptera litura])
TRINITY_DN50256_c0_g1	0.000383747	-11.3476	8.92e-24	4.55e-20	yes	down	430.515	0.225294	437.43	639.37	390.85	422.73	379.69	313.02	0.1	0.21	0.26	0.22	0.19	0.05	0.81	0.32	0.12	0.16	0.21	0.05	0.08	0.2	0.17	0.37	0.31	XP_022824375.1(uncharacterized protein LOC111354946 [Spodoptera litura])
TRINITY_DN29616_c0_g1	0.000190885	-12.355	1.02e-23	5.06e-20	yes	down	33.055	0.00470588	40.09	40.55	15.89	29.88	28.19	43.73	0	0	0.04	0	0	0	0	0	0	0	0	0	0	0	0	0	0.04	XP_022833584.1(pancreatic lipase-related protein 2-like [Spodoptera litura])
TRINITY_DN63575_c7_g1	0.000506156	-10.9481	1.07e-23	5.19e-20	yes	down	22670.7	13.8459	25556.1	20731.5	31215.7	28273.8	14252.4	15994.8	4.91	6.7	22.25	4.96	6.51	4.96	21.51	31.42	7.41	7.39	7.75	6.92	4.92	7.08	29.89	21.01	39.79	XP_022816379.1(larval cuticle protein 16/17-like [Spodoptera litura])
TRINITY_DN56534_c3_g1	900.033	9.81383	1.09e-23	5.16e-20	yes	up	0.211667	230.308	0.16	0.2	0.19	0.21	0.34	0.17	158.75	165.61	198.99	264.15	302.78	224.08	80.15	171.86	316.15	245.48	288.57	270.84	226.79	280.18	164.76	299.23	256.86	XP_022824786.1(uncharacterized family 31 glucosidase KIAA1161-like [Spodoptera litura])
TRINITY_DN63864_c8_g1	0.000292688	-11.7383	1.11e-23	5.15e-20	yes	down	5562.36	3.92471	6533.97	8188.76	4557.42	4267.07	5038.64	4788.31	0.43	0.66	6.38	1.44	1.24	0.63	12.81	7.26	3.07	1.76	1.88	2.08	1.57	2	7.94	9.73	5.84	ABR88248.1(trypsin T5 [Heliothis virescens])
TRINITY_DN56022_c0_g1	0.000305508	-11.6765	1.22e-23	5.55e-20	yes	down	140.058	0.0576471	87.18	119.32	93.32	252.91	152.84	134.78	0.03	0.06	0.02	0.13	0.09	0	0.06	0.08	0.07	0.04	0.08	0.03	0.09	0.07	0.07	0	0.06	XP_022826995.1(uncharacterized protein LOC111356752 [Spodoptera litura])
TRINITY_DN60279_c0_g1	0.000784207	-10.3165	1.31e-23	5.83e-20	yes	down	180.542	0.300588	174.32	218.61	183.13	199.14	158.33	149.72	0.38	0.08	0.43	0.83	0.13	0.3	0.59	0.09	0.18	0.81	0.18	0.12	0	0.57	0.06	0.1	0.26	XP_022814754.1(uncharacterized protein LOC111348391 [Spodoptera litura])
TRINITY_DN55851_c0_g2	0.00016978	-12.524	1.54e-23	6.69e-20	yes	down	250.077	0.0576471	261.39	407.72	214.6	209.54	192.46	214.75	0.04	0	0.16	0.08	0	0	0	0.11	0.16	0.04	0.04	0.07	0.12	0.04	0.04	0.08	0	XP_022835499.1(pancreatic triacylglycerol lipase-like, partial [Spodoptera litura])
TRINITY_DN54626_c0_g1	0.00133209	-9.5521	1.76e-23	7.52e-20	yes	down	66.3317	0.153529	47.63	36.72	58.69	85.48	61.47	108	0.15	0.07	0.07	0.07	0.07	0.18	0.14	0.18	0.41	0.22	0.22	0.3	0.07	0.2	0.07	0.04	0.15	XP_022828311.1(circadian clock-controlled protein-like [Spodoptera litura])
TRINITY_DN57662_c7_g1	0.00243143	-8.68398	1.77e-23	7.4e-20	yes	down	240.655	0.828235	331.27	237.58	181.31	144.76	259.14	289.87	0.07	0.63	1.02	0.89	0.72	0.42	1.4	1.07	0.71	0.7	1.18	0.82	0.76	0.79	1.25	0.69	0.96	XP_022819062.1(carboxypeptidase B-like [Spodoptera litura])
TRINITY_DN61591_c0_g1	0.0011759	-9.73202	1.81e-23	7.42e-20	yes	down	1349.37	4.39588	1599.03	1718.93	1000.9	1176.48	1383.18	1217.72	3.75	4.42	1.47	7.8	3.15	4.3	5.17	6.97	5.27	4.2	0.89	5.45	3.45	8.63	2.88	4.8	2.13	XP_022819707.1(actin cytoskeleton-regulatory complex protein PAN1-like [Spodoptera litura])
TRINITY_DN56544_c3_g4	0.000194027	-12.3315	2.14e-23	8.62e-20	yes	down	98.1017	0.0164706	93.65	110.03	101.26	97.56	88.74	97.37	0	0	0	0	0.07	0.07	0.07	0.07	0	0	0	0	0	0	0	0	0	None
TRINITY_DN54211_c1_g1	0.000602956	-10.6957	2.44e-23	9.62e-20	yes	down	183.052	0.148824	236.21	238.21	189.98	163.57	118.76	151.58	0.11	0.19	0.29	0.18	0.09	0.12	0.09	0.49	0.09	0.21	0.1	0.13	0.05	0.05	0	0.24	0.1	XP_022828774.1(uncharacterized protein LOC111358100 [Spodoptera litura])
TRINITY_DN54876_c0_g2	0.000264551	-11.8842	2.71e-23	1.05e-19	yes	down	120.747	0.0488235	158.92	192.75	37.64	95.33	171.91	67.93	0.05	0.05	0.13	0.04	0.11	0.01	0.03	0.04	0.07	0.06	0	0.1	0	0.06	0.04	0.03	0.01	XP_022821249.1(maltase A1-like [Spodoptera litura])
TRINITY_DN53159_c2_g1	0.000192469	-12.3431	2.71e-23	1.03e-19	yes	down	53.8333	0.00764706	47.47	55.29	51.68	75.11	52	41.45	0	0	0.13	0	0	0	0	0	0	0	0	0	0	0	0	0	0	XP_022831333.1(glucose dehydrogenase [FAD, quinone]-like [Spodoptera litura])
TRINITY_DN56868_c4_g1	0.000279523	-11.8047	2.83e-23	1.06e-19	yes	down	315.3	0.134118	313.28	461.96	285.74	272.04	253.37	305.41	0.11	0.11	0.56	0.1	0.05	0.04	0	0.36	0.1	0.06	0.35	0.04	0.05	0	0.05	0.15	0.15	XP_022822182.1(pancreatic triacylglycerol lipase-like [Spodoptera litura])
TRINITY_DN49293_c0_g1	0.000317724	-11.6199	4.98e-23	1.83e-19	yes	down	223.083	0.0941176	217.3	304.24	219.1	249.73	169.56	178.57	0.14	0.13	0.13	0	0.06	0.05	0.29	0.05	0.13	0	0.13	0.05	0.06	0	0	0.19	0.19	XP_022824842.1(chondroitin proteoglycan 2-like [Spodoptera litura])
TRINITY_DN58384_c2_g2	0.000546175	-10.8383	5.19e-23	1.87e-19	yes	down	1195.23	0.900588	1083.34	1396.78	934.86	1406.96	1202.49	1146.96	0.34	0.06	1.26	0.29	1.12	1.18	1.22	0.65	0.57	0.54	0.26	1.75	2.13	1.51	1.2	0.99	0.24	XP_022816382.1(inducible metalloproteinase inhibitor protein-like [Spodoptera litura])
TRINITY_DN60161_c1_g1	0.0132149	-6.24169	5.32e-23	1.89e-19	yes	down	191.553	3.98765	211.87	253.89	242.52	190.03	145.69	105.32	2.51	7.62	2.47	4.31	4.88	4.41	2.83	3.38	3.65	3.64	2.8	4.43	5.41	3.95	3.71	5.73	2.06	XP_022814041.1(alpha-amylase 4N-like [Spodoptera litura])
TRINITY_DN59209_c1_g2	0.0010615	-9.87967	5.91e-23	2.06e-19	yes	down	256.63	0.632353	298.64	589.43	179.21	108.63	167.4	196.47	0.21	0.13	1.07	0.28	0.08	1.43	0.42	0.42	0.76	0.54	1.43	0.3	0.71	1.15	0.28	1.27	0.27	XP_022824778.1(pancreatic triacylglycerol lipase-like [Spodoptera litura])
TRINITY_DN51867_c0_g2	0.00408741	-7.9346	6.95e-23	2.38e-19	yes	down	54.8083	0.602353	57.79	61.39	37.61	51	60.18	60.88	0.04	0.35	0.55	0.51	0.48	0.67	0.17	0.74	0.52	0.97	0.43	1.24	0.7	1.36	0.68	0.21	0.62	XP_022824737.1(uncharacterized family 31 glucosidase KIAA1161-like [Spodoptera litura])
TRINITY_DN49865_c0_g1	0.000344336	-11.5039	7.25e-23	2.45e-19	yes	down	6733.68	2.56706	7652.56	5794.93	9582.66	8655.5	3980.59	4735.83	0	0	3.81	0	4.13	0	3.35	0	4.06	8.81	4.26	3.65	0	3.67	4.31	0	3.59	XP_013187051.1(PREDICTED: larval cuticle protein 1-like [Amyelois transitella])
TRINITY_DN37121_c0_g3	0.000423464	-11.2055	7.79e-23	2.59e-19	yes	down	238.693	0.136471	267.31	240.42	238.26	189.07	213.05	284.05	0.08	0.16	0.28	0.04	0.11	0.07	0.33	0.17	0	0.22	0	0.2	0.19	0.15	0.04	0.08	0.2	ALO61084.1(serine protease [Spodoptera frugiperda])
TRINITY_DN59170_c1_g2	0.00079834	-10.2907	8.81e-23	2.88e-19	yes	down	59.5533	0.0717647	63.48	55.68	51.28	53.4	71.74	61.74	0.1	0	0.21	0.02	0.1	0.07	0.02	0.07	0.03	0.11	0.09	0.02	0.03	0.05	0.02	0.15	0.13	XP_022822371.1(bile salt-activated lipase-like [Spodoptera litura])
TRINITY_DN58613_c0_g1	0.00088437	-10.1431	9.54e-23	3.07e-19	yes	down	2172.76	2.55824	2257.41	2421.68	2040.54	1899.98	2176.63	2240.32	1.21	1.6	2.61	1.2	0.74	1.18	8.6	3.95	1.68	3.67	1.76	1.34	1.15	1.24	5.45	3.12	2.99	None
TRINITY_DN59196_c0_g1	0.000957848	-10.0279	1.03e-22	3.28e-19	yes	down	70.9383	0.118824	49.22	66.49	79.6	84.29	94.35	51.68	0.03	0.07	0.27	0.12	0.35	0.02	0.07	0.09	0.04	0.09	0.1	0.15	0.1	0.14	0.05	0.05	0.28	XP_022816435.1(luciferin 4-monooxygenase-like [Spodoptera litura])
TRINITY_DN52474_c0_g1	0.000467258	-11.0635	1.19e-22	3.73e-19	yes	down	431.223	0.289412	420.2	320.85	311.91	368.29	715.75	450.34	0.06	0.05	1.14	0.34	0.34	0.34	0.09	0.17	0.25	0.05	0.05	0.5	0.44	0.44	0.26	0.13	0.27	None
TRINITY_DN44347_c1_g1	0.00021019	-12.216	1.36e-22	4.19e-19	yes	down	101.447	0.0264706	109.2	120.82	53.91	78.85	109.96	135.94	0.03	0	0.03	0.06	0.06	0.03	0.09	0	0.03	0	0.03	0	0	0	0.03	0.06	0	XP_021193900.1(zinc carboxypeptidase-like [Helicoverpa armigera])
TRINITY_DN52896_c0_g1	0.000167097	-12.547	1.53e-22	4.64e-19	yes	down	384.405	0.0847059	204.69	327.32	563.25	707.3	130.25	373.62	0.18	0	0.25	0.08	0	0.07	0	0.07	0.33	0	0	0.14	0.08	0.08	0.16	0	0	XP_022822936.1(sarcoplasmic calcium-binding proteins I, III, and IV-like [Spodoptera litura])
TRINITY_DN37346_c0_g1	0.000444938	-11.1341	2.03e-22	6.08e-19	yes	down	65.9817	0.0188235	118.65	70.95	39.77	54.09	69.97	42.46	0.32	0	0	0	0	0	0	0	0	0	0	0	0	0	0	0	0	None
TRINITY_DN52516_c0_g1	0.000268407	-11.8633	2.58e-22	7.59e-19	yes	down	167.622	0.0523529	170.72	210.73	149.1	196.83	141.7	136.65	0	0	0.1	0	0	0.09	0	0	0.1	0	0.11	0.09	0.1	0	0.3	0	0	XP_022824842.1(chondroitin proteoglycan 2-like [Spodoptera litura])
TRINITY_DN57304_c0_g1	0.000311011	-11.6507	3.02e-22	8.77e-19	yes	down	123.705	0.0547059	111.39	124.35	79.92	139.75	166.21	120.61	0	0.02	0.12	0.02	0	0.05	0.02	0.05	0.14	0	0.04	0.05	0.04	0.08	0.17	0.11	0.02	XP_022816656.1(uncharacterized protein LOC111349682 [Spodoptera litura])
TRINITY_DN37787_c0_g1	0.000426731	-11.1944	3.42e-22	9.8e-19	yes	down	57.9683	0.01	67.35	36.17	38.02	36.46	126	43.81	0	0	0	0	0	0	0	0.17	0	0	0	0	0	0	0	0	0	XP_022815951.1(adult-specific cuticular protein ACP-20-like [Spodoptera litura])
TRINITY_DN57787_c1_g1	0.00161712	-9.27235	3.43e-22	9.69e-19	yes	down	123.142	0.338824	127.66	82.74	164.11	145.79	117.53	101.02	0.08	0.24	0.38	0.74	0.24	0.41	0.1	0.22	0.06	1.07	0.09	0.63	0.14	0.48	0.36	0.38	0.14	XP_022814927.1(endocuticle structural glycoprotein SgAbd-3-like [Spodoptera litura])
TRINITY_DN54990_c0_g2	0.000258236	-11.919	4.66e-22	1.3e-18	yes	down	197.622	0.0776471	231.63	177.98	129.01	143.19	217.42	286.5	0.03	0.12	0.37	0.03	0.05	0	0.09	0	0.15	0.16	0.06	0.1	0.03	0.07	0.03	0.03	0	XP_022823787.1(zinc carboxypeptidase-like [Spodoptera litura])
TRINITY_DN50321_c0_g1	0.000285883	-11.7723	4.7e-22	1.29e-18	yes	down	2146.63	0.872941	2555.59	2563.06	1440.8	1964.98	2386	1969.35	1.14	0.58	4.07	1.05	0.27	0.24	0	0.25	1.42	0.31	0.3	0.48	0.56	0	1.37	2.27	0.53	XP_022817301.1(uncharacterized protein KIAA0754-like [Spodoptera litura])
TRINITY_DN40764_c0_g1	0.000563316	-10.7938	5.15e-22	1.4e-18	yes	down	2510.47	3.11471	3418.24	4622.33	977.41	3404.15	1356.27	1284.4	6.63	1.07	10.88	0	0	6.09	0.94	0.86	10.6	0.88	1.12	0	0	0.61	2.42	1.5	9.35	None
TRINITY_DN52352_c0_g1	0.000428552	-11.1882	5.81e-22	1.56e-18	yes	down	858.83	0.512941	832.84	955.8	829.7	845.52	850.22	838.9	0.26	0.35	0.87	0.21	0.22	0.12	2.01	0.35	0.79	0.3	0.21	0.17	0.1	0.43	0.62	0.94	0.77	ABW98673.1(chitin-binding protein [Spodoptera exigua])
TRINITY_DN52792_c0_g1	0.000328517	-11.5717	5.95e-22	1.58e-18	yes	down	139.027	0.0511765	161.91	144.28	93.77	175.69	133.97	124.54	0	0	0.09	0	0.09	0	0.17	0.16	0	0	0	0	0.09	0.09	0	0.09	0.09	None
TRINITY_DN57986_c3_g1	0.000286927	-11.767	6.08e-22	1.59e-18	yes	down	405.195	0.151176	603.15	564.39	355.68	338.82	294.93	274.2	0	0.1	0.66	0	0.09	0.09	0.09	0.35	0.18	0.11	0	0.08	0.1	0.23	0	0.39	0.1	XP_022824548.1(pancreatic triacylglycerol lipase-like [Spodoptera litura])
TRINITY_DN53350_c0_g3	0.000321291	-11.6038	6.1e-22	1.58e-18	yes	down	2220.28	0.679412	2676.13	3879.32	1781.53	1656.6	1645.28	1682.84	0	0	2.71	0	0	0	2.67	0	0	0	3.07	0	0	0	0	3.1	0	XP_021196264.1(trypsin, alkaline C-like [Helicoverpa armigera])
TRINITY_DN57317_c11_g1	0.0211741	-5.56156	6.86e-22	1.75e-18	yes	down	373.402	40.4965	377.77	302.64	559.41	220.17	310.06	470.36	30.13	27.04	22	4.14	9.31	3.77	40.54	22.2	25.19	56.79	58.59	5.69	17.4	51.96	129.77	86.62	97.3	None
TRINITY_DN43098_c0_g1	0.00166637	-9.22907	7.01e-22	1.77e-18	yes	down	473.498	0.611765	463.59	319.36	320.09	346.86	920.67	470.42	0.42	0.28	1.26	0.66	0.74	1.09	1.24	0.5	0.31	0.31	0.5	0.65	0.37	0.85	0.14	0.34	0.74	XP_022816372.1(endocuticle structural glycoprotein SgAbd-8-like [Spodoptera litura])
TRINITY_DN59525_c2_g1	0.00301918	-8.37163	7.21e-22	1.8e-18	yes	down	47.75	0.269412	51.45	62.1	62.72	30.47	35.5	44.26	0.3	0.21	0.21	0.13	0.39	0.21	0.48	0.26	0.16	0.22	0.35	0.48	0.2	0.08	0.23	0.56	0.11	XP_022822384.1(lipase member H-like [Spodoptera litura])
TRINITY_DN58778_c5_g1	0.000285043	-11.7765	7.71e-22	1.9e-18	yes	down	366.008	0.127059	428.62	391.59	377.38	311.62	371.58	315.26	0	0	0	0	0	0	0.2	0.65	0.22	0.24	0.46	0.18	0	0	0.21	0	0	None
TRINITY_DN58574_c1_g5	0.000262012	-11.8981	7.87e-22	1.91e-18	yes	down	526.743	0.188824	607.99	705.23	357.61	603.09	479.63	406.91	0.21	0.03	0.49	0.05	0.22	0.11	0.08	1.07	0.04	0.12	0.12	0.07	0.13	0.15	0.1	0.11	0.11	XP_022837598.1(uncharacterized protein LOC111364789 [Spodoptera litura])
TRINITY_DN53350_c0_g9	0.000191734	-12.3486	7.97e-22	1.92e-18	yes	down	217.577	0.0452941	267.18	247.52	248.83	237.98	111.76	192.19	0	0.08	0.16	0	0	0	0	0.21	0	0.09	0	0	0.08	0.15	0	0	0	XP_022821651.1(trypsin, alkaline C-like isoform X5 [Spodoptera litura])
TRINITY_DN60742_c1_g2	0.000490773	-10.9927	8.53e-22	2.03e-18	yes	down	2559.7	2.04235	3279.04	3571.54	2388.33	1703.6	2254.21	2161.46	1.14	0.86	4.09	0.35	0.76	0.79	5.31	5.21	0.92	0.38	1.15	0.92	0.7	0.68	3.87	5.47	2.12	PCG79269.1(hypothetical protein B5V51_1360 [Heliothis virescens])
TRINITY_DN53335_c0_g1	0.000208825	-12.2254	8.53e-22	2.01e-18	yes	down	123.343	0.0323529	125.63	118.96	99.75	123.7	118.96	153.06	0.03	0.12	0.03	0	0.08	0	0.11	0.03	0.03	0	0.03	0	0	0.03	0.06	0	0	XP_022824830.1(mucin-2-like [Spodoptera litura])
TRINITY_DN63575_c6_g1	0.000593735	-10.7179	1.04e-21	2.41e-18	yes	down	1926.18	1.38706	2234.68	878.19	3666.56	3103.95	824.93	848.8	0	1.56	0	1.37	1.53	2.67	1.38	2.87	0	3.32	1.64	0	1.55	1.39	0	1.6	2.7	XP_022816373.1(larval cuticle protein 1-like [Spodoptera litura])
TRINITY_DN59090_c3_g2	0.000970574	-10.0089	1.1e-21	2.52e-18	yes	down	12815.3	18.9182	14092.6	8836.01	16990.8	15122.2	11528.5	10321.5	21.24	22.9	36.2	30.02	26.45	24.23	2.41	3.03	26.99	21.56	23.99	22.26	26.52	25.24	4.14	2.61	1.82	None
TRINITY_DN51662_c0_g1	0.00194206	-9.0082	1.14e-21	2.6e-18	yes	down	64.0767	0.177059	105.78	70.66	36.34	26.33	87.63	57.72	0.25	0.13	0.08	0.16	0.23	0.13	0.07	0.56	0.15	0.19	0.15	0.08	0.14	0.05	0.05	0.32	0.27	XP_022831683.1(acetylcholinesterase-like [Spodoptera litura])
TRINITY_DN59423_c3_g1	0.000418365	-11.223	1.15e-21	2.58e-18	yes	down	34.3767	0.0123529	34.63	48.96	32.14	25.47	33.24	31.82	0	0.07	0	0	0	0	0.07	0	0	0	0	0	0	0	0	0	0.07	XP_022824834.1(uncharacterized protein LOC111355283 [Spodoptera litura])
TRINITY_DN57864_c5_g1	0.000367442	-11.4102	1.36e-21	3.03e-18	yes	down	65.95	0.0470588	65.95	67.33	65.38	65.54	70.37	61.13	0	0.04	0.15	0	0	0	0.02	0.06	0.13	0	0	0.05	0	0.12	0.08	0.05	0.1	XP_022814663.1(retinoid-inducible serine carboxypeptidase-like [Spodoptera litura])
TRINITY_DN54842_c0_g1	0.000325232	-11.5862	1.36e-21	3e-18	yes	down	742.395	0.385294	741.82	631.22	1107.49	395.37	616.56	961.91	0.2	0.92	0.54	0	0.37	0	0.33	0.74	0.18	0	0.44	0	0	0.35	0.71	1.08	0.69	XP_022834165.1(uncharacterized protein LOC111361938 [Spodoptera litura])
TRINITY_DN43901_c1_g1	0.000291033	-11.7465	1.67e-21	3.63e-18	yes	down	34.72	0.00823529	34.74	43.22	36.06	35.62	25.87	32.81	0	0	0	0	0	0	0.09	0	0	0	0	0	0	0	0	0.05	0	XP_022826440.1(chymotrypsin-1-like [Spodoptera litura])
TRINITY_DN110230_c0_g1	0.000450619	-11.1158	1.83e-21	3.94e-18	yes	down	73.9633	0.02	77.32	82.89	66.7	67.96	72.94	75.97	0	0	0	0	0	0	0	0	0	0	0	0.34	0	0	0	0	0	None
TRINITY_DN61118_c0_g1	0.0148422	-6.07415	1.85e-21	3.95e-18	yes	down	82.4617	1.86706	71.69	49.02	103.58	59.83	78.61	132.04	3.56	0.71	1.71	2.63	2.94	1.16	1.09	2.81	2.58	0.76	3.59	1.51	1.4	0.96	2.75	0.99	0.59	XP_022814892.1(trypsin CFT-1-like [Spodoptera litura])
TRINITY_DN60329_c7_g1	0.0165604	-5.91612	1.97e-21	4.16e-18	yes	down	364.423	1.75294	421.25	347.76	381.69	300.1	296.4	439.34	1.74	1.12	1.79	1.02	3.16	1.28	1.07	2.76	1.33	1.44	1.53	1.3	1.13	0.74	3.01	1.93	3.45	None
TRINITY_DN58778_c6_g3	0.00029324	-11.7356	2.1e-21	4.39e-18	yes	down	462.518	0.226471	570.2	462.3	424.8	410.27	477.19	430.35	0	0.17	1.03	0.05	0.15	0.21	0.46	0.22	0.19	0.05	0	0.11	0.08	0.08	0.42	0.31	0.32	XP_022831348.1(collagenase-like [Spodoptera litura])
TRINITY_DN45764_c0_g1	0.011612	-6.42824	2.54e-21	5.27e-18	yes	down	107.728	1.80941	169.07	91.48	90.7	139.6	88.25	67.27	1.94	1.26	3.87	1.38	1.01	1.78	0.64	2.21	2.01	3.17	1.45	1.51	0.75	1.49	2.82	1.67	1.8	None
TRINITY_DN7535_c0_g1	0.000685783	-10.51	2.86e-21	5.86e-18	yes	down	22.1	0.00764706	26.17	34.61	9.87	22.26	17.72	21.97	0	0	0	0	0	0	0	0	0	0	0.13	0	0	0	0	0	0	XP_022834169.1(uncharacterized protein LOC111361941 [Spodoptera litura])
TRINITY_DN53350_c0_g5	0.000358288	-11.4466	3.21e-21	6.53e-18	yes	down	51.7567	0.0194118	59.65	82.83	43.81	30.57	43.23	50.45	0	0	0.06	0	0	0	0.05	0.05	0	0	0	0	0	0	0.11	0	0.06	XP_022821647.1(trypsin CFT-1-like isoform X1 [Spodoptera litura])
TRINITY_DN60409_c4_g1	0.0179189	-5.80238	3.26e-21	6.56e-18	yes	down	101.257	2.63353	120.58	126.15	85.96	84.74	103.21	86.9	1.31	1.55	1.48	3.25	3.02	3.39	4.57	2.56	1.47	2.09	1.99	1.81	2.43	3.13	3.39	3.33	4	XP_022820599.1(apoptotic chromatin condensation inducer in the nucleus-like [Spodoptera litura])
TRINITY_DN26769_c0_g1	0.000249744	-11.9673	3.35e-21	6.67e-18	yes	down	274.052	0.0641176	406.38	359.01	445.08	103.15	113.63	217.06	0.14	0.19	0.12	0	0.12	0	0	0.11	0.12	0	0	0	0.17	0	0	0.12	0	AFI57045.1(MG7 [Spodoptera litura])
TRINITY_DN83175_c0_g1	0.000215253	-12.1817	3.62e-21	7.15e-18	yes	down	640.033	0.158235	535.7	262.4	1004	423.98	1185.96	428.16	0	0	0.25	0	0.25	0	0	0.23	0	0	0	0.44	1.02	0	0	0.26	0.24	XP_022816175.1(larval cuticle protein LCP-22-like [Spodoptera litura])
TRINITY_DN57572_c2_g2	0.000340148	-11.5215	3.64e-21	7.11e-18	yes	down	231.365	0.08	248.01	383.41	216.19	267.32	135.04	138.22	0.16	0	0.38	0	0	0	0.23	0.13	0	0	0.21	0	0	0	0.11	0.14	0	None
TRINITY_DN56691_c0_g3	0.00158619	-9.30022	4.07e-21	7.88e-18	yes	down	1470.39	2.91353	1509.6	1537.47	1081.08	1410.44	1653.41	1630.34	0.31	0.56	0.51	0.11	8.66	0.5	0.04	24.85	0.97	0.75	9.04	1.15	0.52	1.01	0.25	0.11	0.19	XP_022832134.1(collagenase-like isoform X3 [Spodoptera litura])
TRINITY_DN59104_c0_g1	0.000278235	-11.8114	4.68e-21	8.98e-18	yes	down	43.6283	0.0147059	52.51	33.42	41.2	23.66	44.87	66.11	0	0	0.04	0	0.04	0	0.02	0	0	0.07	0	0.02	0	0	0.02	0	0.04	XP_022828223.1(organic cation transporter protein-like [Spodoptera litura])
TRINITY_DN63429_c2_g4	0.000252838	-11.9495	4.85e-21	9.22e-18	yes	down	86.46	0.0188235	89.26	208.89	60.1	64.04	12.33	84.14	0	0.11	0	0	0.1	0	0	0	0	0	0	0	0	0	0	0	0.11	XP_022823846.1(uncharacterized protein LOC111354551 [Spodoptera litura])
TRINITY_DN56769_c0_g1	0.000377642	-11.3707	4.92e-21	9.27e-18	yes	down	1582.41	0.818235	1551.23	1874.57	1164.14	1591.58	1485.87	1827.09	0.27	0.25	1.42	0.18	0.18	0.54	2.17	2.77	0.49	0.31	0.15	0.37	0.24	0.47	1.63	1.58	0.89	XP_022815737.1(trypsin, alkaline C-like [Spodoptera litura])
TRINITY_DN51681_c0_g1	0.000345334	-11.4997	5.31e-21	9.93e-18	yes	down	105.287	0.0482353	110.43	142.2	128.47	87.45	74.92	88.25	0.05	0	0.04	0.04	0	0	0.08	0.11	0	0	0.22	0.04	0	0	0.04	0.12	0.08	XP_022837745.1(calphotin-like [Spodoptera litura])
TRINITY_DN60383_c0_g1	0.000955048	-10.0321	6.19e-21	1.15e-17	yes	down	32.19	0.0441176	31.68	24.75	18.89	45.95	45.12	26.75	0.08	0.08	0.04	0.03	0	0.02	0.03	0.05	0.07	0.02	0.08	0.01	0.08	0.03	0.03	0.1	0	XP_022826606.1(Niemann-Pick type protein homolog 1B-like [Spodoptera litura])
TRINITY_DN42913_c0_g1	0.000311207	-11.6498	6.96e-21	1.28e-17	yes	down	125.872	0.232353	150.83	94.11	146.57	107.85	89.26	166.61	0	0.14	0.25	0	0	0	0.06	3.17	0	0.07	0	0	0.06	0	0.14	0.06	0	XP_022834169.1(uncharacterized protein LOC111361941 [Spodoptera litura])
TRINITY_DN60825_c2_g4	0.00115928	-9.75255	7.24e-21	1.32e-17	yes	down	367.32	0.258824	512.02	529.99	447.26	219.17	265.39	230.09	0.59	0.23	0.22	0.09	0.03	0.17	0.68	0.24	0.58	0.26	0.55	0.14	0.21	0.06	0.19	0.06	0.1	XP_022822920.1(membrane-bound alkaline phosphatase-like [Spodoptera litura])
TRINITY_DN55007_c0_g1	0.000475658	-11.0378	7.38e-21	1.33e-17	yes	down	619.418	0.494706	640.64	821.11	407.34	683.57	603.6	560.25	2.04	0	1.91	0	0.52	0.46	0.48	0.48	0	0	0	0.9	0	0	0	1.62	0	XP_022824836.1(uncharacterized protein LOC111355285 [Spodoptera litura])
TRINITY_DN61911_c0_g1	0.000198207	-12.3007	7.61e-21	1.36e-17	yes	down	80.5883	0.400588	96.46	77.04	20.44	14.33	109.17	166.09	0	0	0	6.73	0	0	0	0	0	0	0	0	0	0	0	0	0.08	None
TRINITY_DN51655_c1_g1	0.000496161	-10.9769	7.65e-21	1.36e-17	yes	down	169.66	0.123529	178.37	209.21	148.22	152.45	138.6	191.11	0.07	0	0.17	0.01	0.08	0.07	0.32	0.21	0.03	0.09	0.1	0.11	0.09	0.02	0.22	0.25	0.26	XP_022825010.1(membrane alanyl aminopeptidase-like [Spodoptera litura])
TRINITY_DN49386_c1_g1	0.000455099	-11.1015	7.65e-21	1.35e-17	yes	down	60.625	0.0347059	49.87	59.53	46.82	68.26	49.42	89.85	0.15	0	0.05	0	0.04	0.12	0	0.04	0	0	0.05	0	0	0	0.09	0	0.05	XP_022832223.1(pancreatic lipase-related protein 2-like [Spodoptera litura])
TRINITY_DN43901_c0_g1	0.000753897	-10.3733	8.2e-21	1.43e-17	yes	down	26.075	0.0147059	26.81	35.82	24.42	28.87	19.33	21.2	0	0	0	0	0	0	0	0	0.12	0.13	0	0	0	0	0	0	0	XP_022826438.1(chymotrypsin-1-like [Spodoptera litura])
TRINITY_DN52290_c0_g1	0.000655383	-10.5754	8.62e-21	1.49e-17	yes	down	81.37	0.0470588	98	70.84	73.12	67.36	92.53	86.37	0	0	0	0.2	0.21	0	0	0	0	0	0	0.18	0	0.21	0	0	0	None
TRINITY_DN51284_c0_g1	0.00318088	-8.29636	8.9e-21	1.53e-17	yes	down	21.0067	0.345882	22.95	26.23	17.4	16.85	20.58	22.03	0.09	1.24	0.2	0.51	0	0.6	0.82	0.1	0.08	0.41	0.13	0.29	0.6	0.56	0.07	0.07	0.11	XP_022832351.1(xaa-Pro aminopeptidase ApepP-like [Spodoptera litura])
TRINITY_DN166140_c0_g1	0.00051627	-10.9196	9.48e-21	1.61e-17	yes	down	76.595	0.0464706	99.77	109.33	104.49	32.09	41.71	72.18	0	0	0	0	0.13	0	0	0.12	0	0.15	0	0	0	0	0	0.26	0.13	XP_022818451.1(uncharacterized protein LOC111350953 [Spodoptera litura])
TRINITY_DN27484_c1_g1	0.000675608	-10.5315	1.04e-20	1.76e-17	yes	down	11.7867	0.00823529	6.94	13.48	20.96	10.75	7.65	10.94	0.03	0	0	0.02	0.02	0.02	0	0	0.02	0	0.03	0	0	0	0	0	0	XP_022830282.1(uncharacterized protein LOC111359075 isoform X2 [Spodoptera litura])
TRINITY_DN62729_c0_g1	0.000684587	-10.5125	1.12e-20	1.87e-17	yes	down	390.155	0.337059	423	655.8	218.74	449.32	310.4	283.67	0.04	0.08	0.46	0.4	0.88	0.39	0.18	0.47	0.07	0.21	0	0.45	0.69	0.48	0.12	0.31	0.5	XP_022817879.1(uncharacterized protein LOC111350498 [Spodoptera litura])
TRINITY_DN57961_c0_g1	0.000509737	-10.938	1.21e-20	2.02e-17	yes	down	67.9817	0.0641176	95.65	53.38	38.79	72.96	95.49	51.62	0	0.04	0.12	0	0	0.02	0	0.31	0.14	0.03	0.04	0.04	0.09	0.04	0	0.09	0.13	XP_022817987.1(uncharacterized protein LOC111350590, partial [Spodoptera litura])
TRINITY_DN39375_c0_g1	0.000588593	-10.7304	1.26e-20	2.07e-17	yes	down	546.975	0.421176	662.62	140.98	1288.13	863.88	137.73	188.51	0	0.79	1.77	0.24	0.25	0.22	0.47	0.23	0	0.56	0.56	0	0.51	0.25	0.5	0.33	0.48	XP_022816447.1(larval cuticle protein 16/17-like [Spodoptera litura])
TRINITY_DN7084_c0_g1	0.00526928	-7.56818	1.27e-20	2.07e-17	yes	down	11.6783	0.0852941	14.42	10.51	9.29	9.97	14.03	11.85	0.02	0.06	0.05	0.03	0.05	0.07	0.11	0.12	0.08	0.05	0.07	0.05	0.07	0.1	0.11	0.23	0.18	XP_022820447.1(myosin-VIIa-like [Spodoptera litura])
TRINITY_DN35797_c0_g1	0.000734149	-10.4116	1.27e-20	2.06e-17	yes	down	6.02833	0.00352941	5.92	4.95	4.62	6.15	7.3	7.23	0	0	0	0.02	0	0	0	0.02	0	0	0	0	0	0	0	0	0.02	XP_021181769.1(uncharacterized protein LOC110370346 [Helicoverpa armigera])
TRINITY_DN48797_c0_g1	0.00059808	-10.7074	1.31e-20	2.1e-17	yes	down	24.3983	0.0188235	25.25	23.19	17.27	18.16	39.72	22.8	0	0	0.04	0	0.02	0	0.04	0.02	0.02	0	0.02	0	0.04	0	0.08	0.02	0.02	XP_022818572.1(carboxylesterase 1C-like [Spodoptera litura])
TRINITY_DN53159_c1_g4	0.000374136	-11.3841	1.33e-20	2.12e-17	yes	down	83.01	0.0364706	79.15	64.81	51.04	128.87	94.51	79.68	0	0	0.22	0	0.04	0.08	0	0.11	0	0	0.05	0	0	0.04	0	0.04	0.04	XP_022831333.1(glucose dehydrogenase [FAD, quinone]-like [Spodoptera litura])
TRINITY_DN53723_c0_g2	0.000749337	-10.3821	1.43e-20	2.27e-17	yes	down	169.937	0.17	201.91	117.1	125.24	180.82	257.66	136.89	0.06	0.11	0.22	0.42	0.52	0.14	0	0.19	0.11	0.24	0	0.14	0.21	0.32	0.16	0	0.05	XP_022832176.1(uncharacterized protein LOC111360459 [Spodoptera litura])
TRINITY_DN58016_c1_g2	0.000389817	-11.3249	1.46e-20	2.3e-17	yes	down	2758.16	1.44118	2934.42	2697.75	2377	2732.54	2996.97	2810.25	0.5	0.96	3.18	0	0	0	3.83	1.7	0.47	1.03	0.51	4	0.47	0.89	0.93	4.29	1.74	ABW98673.1(chitin-binding protein [Spodoptera exigua])
TRINITY_DN57073_c4_g2	0.00226086	-8.78891	1.64e-20	2.56e-17	yes	down	1379.43	5.44824	1517.67	1203.92	1050.46	882.97	2357.93	1263.62	1.47	1.56	3.67	6.06	6.53	2.28	4.17	14.53	3.99	3.55	2.65	2.83	3.48	2.35	12.15	13.58	7.77	XP_022832989.1(uncharacterized protein LOC111360923 [Spodoptera litura])
TRINITY_DN55082_c8_g5	0.000766034	-10.3503	1.78e-20	2.76e-17	yes	down	1581.24	3.71529	1524.4	1150.91	1753.68	1525.07	1798.72	1734.69	0.19	0.18	1.35	0	19.9	0.4	0.32	18.67	0.18	0	0	0.45	1.2	0.34	0.37	10.92	8.69	None
TRINITY_DN43702_c0_g1	0.00126325	-9.62865	1.91e-20	2.94e-17	yes	down	13.3667	0.00705882	11.48	12.05	16.11	14.22	15.64	10.7	0	0	0	0	0	0	0	0.12	0	0	0	0	0	0	0	0	0	None
TRINITY_DN57024_c2_g1	0.00817385	-6.93477	2.08e-20	3.17e-17	yes	down	949.702	10.8206	1051.11	850.21	923.56	967.49	995.83	910.01	6.36	5.84	5.59	16.64	14.83	11.77	3.24	26.97	5.65	3.3	6.57	10.3	8.43	7.43	14.7	20.16	16.17	XP_022831584.1(larval cuticle protein LCP-17-like [Spodoptera litura])
TRINITY_DN59398_c8_g2	0.00102457	-9.93076	2.19e-20	3.32e-17	yes	down	106.513	0.175882	137.28	137.77	127.38	78.86	79.05	78.74	0.35	0.18	0.43	0	0.06	0.11	0.03	0.18	0.63	0.19	0.07	0.15	0	0.03	0.27	0.22	0.09	XP_022835737.1(membrane-bound alkaline phosphatase-like [Spodoptera litura])
TRINITY_DN28556_c0_g2	0.000505926	-10.9488	2.31e-20	3.47e-17	yes	down	42.2617	0.0311765	49.63	41.14	27.46	41.95	50.12	43.27	0.06	0.1	0.06	0	0	0.02	0	0.02	0.04	0.14	0.02	0.03	0.02	0	0.02	0	0	XP_022830510.1(multiple epidermal growth factor-like domains protein 11, partial [Spodoptera litura])
TRINITY_DN21432_c0_g1	0.000389552	-11.3259	2.31e-20	3.45e-17	yes	down	94.87	0.0370588	100.65	128.96	52.63	92.42	100.76	93.8	0	0	0	0	0	0	0.11	0.3	0	0	0	0	0.11	0	0	0	0.11	XP_022824663.1(soluble scavenger receptor cysteine-rich domain-containing protein SSC5D-like [Spodoptera litura])
TRINITY_DN55255_c0_g1	0.000492667	-10.9871	2.61e-20	3.88e-17	yes	down	73.1433	0.0441176	100.98	40.54	47.65	80.36	111.07	58.26	0	0.06	0.15	0.18	0	0.04	0.04	0	0.02	0.1	0	0	0	0	0.05	0.06	0.05	XP_022816472.1(cadherin-4-like [Spodoptera litura])
TRINITY_DN57760_c2_g2	0.000404807	-11.2705	2.67e-20	3.93e-17	yes	down	29.56	0.0123529	18.09	12.31	48.69	50.01	16.86	31.4	0	0.03	0	0	0	0	0.03	0.07	0	0	0.06	0.02	0	0	0	0	0	XP_022826756.1(fatty acyl-CoA reductase wat-like [Spodoptera litura])
TRINITY_DN60121_c0_g2	0.000626319	-10.6408	2.9e-20	4.24e-17	yes	down	435.825	0.234118	506.23	500.56	237.53	441.2	384.81	544.62	0	0	2.52	0	0	0	0	0	0	1.46	0	0	0	0	0	0	0	XP_022814470.1(uncharacterized protein LOC111348189 [Spodoptera litura])
TRINITY_DN46716_c0_g1	0.00112579	-9.79485	2.9e-20	4.21e-17	yes	down	353.292	0.460588	443.03	336.12	310.35	275.29	389.67	365.29	0	0.49	0.3	0.09	1.87	0.94	0	0.23	0.66	0.14	0.59	0.93	0.44	0.52	0.13	0.5	0	None
TRINITY_DN55113_c4_g1	0.000384051	-11.3464	2.95e-20	4.25e-17	yes	down	136.353	0.0747059	136.42	133	112.45	146.01	151.17	139.07	0	0.19	0.22	0.06	0.03	0	0	0.04	0.18	0.07	0.09	0	0	0	0.12	0.09	0.18	XP_022817903.1(zinc carboxypeptidase A 1-like [Spodoptera litura])
TRINITY_DN143462_c0_g1	0.000793292	-10.2999	3.09e-20	4.43e-17	yes	down	43.655	0.0317647	40.47	41.76	40.74	39.31	47.13	52.52	0	0	0	0	0	0	0.13	0	0	0	0	0	0	0	0.14	0.14	0.13	XP_022818112.1(esterase FE4-like [Spodoptera litura])
TRINITY_DN51528_c0_g1	0.0144085	-6.11694	3.13e-20	4.46e-17	yes	down	60.965	1.66235	76.16	81.55	32.68	57.84	60	57.56	0.87	1.24	1.02	2.33	2.6	2.3	2.09	1.87	0.95	0.99	0.87	1.81	2.03	2.12	1.82	1.62	1.73	XP_022824581.1(cytochrome P450 6B6-like [Spodoptera litura])
TRINITY_DN35672_c0_g1	0.000414748	-11.2355	3.31e-20	4.68e-17	yes	down	10.7817	0.00529412	17.74	4.64	4.58	12.43	17.63	7.67	0	0.01	0	0	0	0	0.01	0	0	0.04	0	0.01	0	0	0	0.01	0.01	XP_022817987.1(uncharacterized protein LOC111350590, partial [Spodoptera litura])
TRINITY_DN43146_c0_g1	0.000297327	-11.7157	3.55e-20	4.99e-17	yes	down	680.923	0.282353	914.47	755.5	549.22	397.02	705.94	763.39	0.09	0	1.28	0	0.19	0	0.09	0.34	0.3	0.11	0.1	0	0.19	0.19	0.76	0.97	0.19	XP_022821652.1(trypsin CFT-1-like [Spodoptera litura])
TRINITY_DN62840_c1_g3	0.00549876	-7.50668	3.78e-20	5.27e-17	yes	down	15.8317	1.27	19.66	30.91	19.66	5.86	13.86	5.04	0.19	0.26	0.22	0.12	0.18	0.09	0.1	6.67	9.6	1.64	1.74	0.13	0.16	0.13	0.15	0.08	0.13	XP_022835059.1(vitellogenin-like [Spodoptera litura])
TRINITY_DN62906_c1_g3	0.00914524	-6.77276	3.88e-20	5.38e-17	yes	down	51.285	0.689412	48.25	50.89	40.86	44.12	57.17	66.42	1.84	1.51	0.78	0.54	0.6	0.41	0.44	0.17	1.16	1.11	0.8	0.41	0.54	0.3	0.43	0.25	0.43	None
TRINITY_DN62274_c2_g1	0.00449745	-7.79668	4.09e-20	5.62e-17	yes	down	87.4817	0.830588	58.7	109.04	82.72	79.96	80.76	113.71	0.17	0.62	1.28	0.27	0.16	0.77	1.04	0.95	0.3	0.54	0.61	0.75	0.66	0.92	1.6	2.06	1.42	XP_022819760.1(estrogen sulfotransferase-like [Spodoptera litura])
TRINITY_DN56660_c0_g1	0.00182285	-9.09959	4.24e-20	5.8e-17	yes	down	6174.73	15.6894	6724.13	6012.65	8356.29	7899.64	3862.32	4193.33	7.17	6.02	11.19	7.75	8	5.7	18.56	51.89	7.15	8.28	6	6.43	5.62	7.08	37.49	23.38	49.01	XP_022816717.1(LOW QUALITY PROTEIN: larval cuticle protein 1-like [Spodoptera litura])
TRINITY_DN17441_c0_g1	0.000686018	-10.5095	5.09e-20	6.92e-17	yes	down	6.22667	0.00352941	5.69	3.31	8.3	9.32	5.72	5.02	0	0	0	0	0	0	0	0	0.02	0	0	0	0	0.04	0	0	0	None
TRINITY_DN121181_c0_g1	0.00146821	-9.41172	5.09e-20	6.87e-17	yes	down	5.64833	0.00411765	6.18	6.47	4.9	5.25	3.61	7.48	0	0	0.07	0	0	0	0	0	0	0	0	0	0	0	0	0	0	XP_022826631.1(brachyurin-like [Spodoptera litura])
TRINITY_DN61420_c0_g1	0.00077066	-10.3416	5.12e-20	6.86e-17	yes	down	21.9717	0.0235294	26.52	27.34	10.44	20.64	33.43	13.46	0	0	0.05	0	0	0.04	0	0.04	0.04	0.18	0.05	0	0	0	0	0	0	XP_022814883.1(pancreatic lipase-related protein 2-like [Spodoptera litura])
TRINITY_DN54267_c0_g1	0.00127323	-9.61729	6.31e-20	8.41e-17	yes	down	35.625	0.07	39.56	42.76	31.89	26.13	42.69	30.72	0.02	0.11	0.02	0	0.04	0.05	0.11	0.03	0.08	0.06	0.08	0.03	0.02	0.02	0.02	0.28	0.22	XP_022816530.1(cadherin EGF LAG seven-pass G-type receptor 2-like [Spodoptera litura])
TRINITY_DN56691_c0_g1	0.0011098	-9.81549	6.48e-20	8.58e-17	yes	down	46.2117	0.0294118	63.94	44.2	36.71	44.85	40.1	47.47	0.25	0	0	0	0	0	0	0	0	0.25	0	0	0	0	0	0	0	None
TRINITY_DN27722_c0_g1	0.000709062	-10.4618	6.62e-20	8.71e-17	yes	down	13.3867	0.00823529	11.35	10.96	13.5	13.57	14.96	15.98	0	0	0	0	0	0	0	0.03	0	0	0	0	0.07	0	0.04	0	0	XP_022825250.1(trypsin delta-like [Spodoptera litura])
TRINITY_DN57983_c0_g1	0.000538125	-10.8598	6.67e-20	8.73e-17	yes	down	200.002	0.215882	253.36	187.28	216.37	188.13	195.05	159.82	0.05	0.07	0.31	0.16	0.23	0.26	0.02	0.03	0	0.02	0.05	0.2	1.87	0.2	0.13	0.05	0.02	XP_022830409.1(lipase 3-like [Spodoptera litura])
TRINITY_DN48283_c0_g1	0.000973194	-10.005	7.02e-20	9.12e-17	yes	down	98.0133	0.0794118	135.05	130.92	109.21	85.76	66.29	60.85	0	0	0.46	0	0	0	0	0	0	0	0	0	0	0.45	0	0	0.44	None
TRINITY_DN58552_c0_g1	0.0401776	-4.63746	7.36e-20	9.5e-17	yes	down	50.49	2.89059	47.1	49.43	29.64	38.64	76.85	61.28	2.26	3.56	2.56	2.26	2.27	2.82	2.05	4.22	2.57	2.2	3.15	3.04	3.51	2.2	3.62	3.74	3.11	None
TRINITY_DN60045_c2_g1	0.00158224	-9.30381	8.07e-20	1.04e-16	yes	down	303.142	0.641765	296.42	232.45	409.73	413.7	278.14	188.41	0.11	0.53	0.26	0.98	0.73	0.18	0.43	2.78	0.36	0.06	0.22	0.53	0.75	0.81	0.65	0.51	1.02	XP_022828097.1(circadian clock-controlled protein-like [Spodoptera litura])
TRINITY_DN56284_c3_g2	0.0480546	-4.37918	1.1e-19	1.41e-16	yes	down	412	13.0753	460.05	374.92	431.23	422.61	412.4	370.79	9.44	12.25	11.77	15.02	12.18	11.56	11.22	19.98	11.77	11.27	10.37	10.76	9.02	12.95	17.83	19.39	15.5	None
TRINITY_DN55082_c8_g3	0.00128585	-9.60306	1.11e-19	1.41e-16	yes	down	259.988	0.458824	208.11	239.7	241.95	247.58	349.15	273.44	0.22	0.1	0.2	0.29	0.19	0.2	0.38	0.36	0.2	0.22	0.11	0.26	0.4	0.79	0.1	0.91	2.87	AFH57177.1(REPAT19 [Spodoptera littoralis])
TRINITY_DN44224_c0_g1	0.000500355	-10.9648	1.21e-19	1.53e-16	yes	down	1081.96	0.907647	1544.2	1724.1	523.66	1348.48	761.84	589.46	0	0.19	0	0	7.26	0.9	0.57	0.79	0	0.45	1.52	0	0	0.86	2.89	0	0	None
TRINITY_DN17463_c0_g1	0.000533816	-10.8714	1.24e-19	1.56e-16	yes	down	559.542	0.358235	441.53	274.73	548.4	740.18	958.56	393.85	0	0	1.5	0.47	0.51	0	0	0.47	0	0	0.56	0	1.04	0	1.54	0	0	None
TRINITY_DN55699_c0_g1	0.000629749	-10.6329	1.33e-19	1.66e-16	yes	down	311.64	0.254706	267.18	386.45	229.28	195.46	445.71	345.76	0.34	0.32	0	0	0.15	0	0.72	0.14	0.63	0.34	0.17	0	0	0	0.46	0.31	0.75	XP_022815078.1(uncharacterized protein LOC111348627 [Spodoptera litura])
TRINITY_DN54267_c1_g1	0.00049273	-10.9869	1.59e-19	1.97e-16	yes	down	688.723	0.411176	867.56	636.82	551.62	604.36	914.13	557.85	0	0.92	0.04	0	0	0.08	0	2.93	0.65	0	0.51	0.18	0.9	0.03	0.12	0.63	0	XP_022816472.1(cadherin-4-like [Spodoptera litura])
TRINITY_DN57645_c0_g1	0.000813176	-10.2641	1.66e-19	2.05e-16	yes	down	12.045	0.0164706	17.39	5.71	6.52	14.85	16.32	11.48	0.17	0	0.01	0.01	0	0	0	0	0.01	0	0.01	0.04	0.01	0	0	0.02	0	XP_022825007.1(aminopeptidase N-like isoform X1 [Spodoptera litura])
TRINITY_DN55607_c1_g2	0.000752176	-10.3766	1.69e-19	2.07e-16	yes	down	173.688	0.172941	185.46	169.36	88.3	173.25	191.16	234.6	0.15	0.09	0.3	0.09	0.08	0.05	0.6	0.35	0.18	0	0.06	0.03	0.06	0.09	0.59	0.13	0.09	XP_022823840.1(carboxypeptidase B-like [Spodoptera litura])
TRINITY_DN49720_c0_g1	0.000581221	-10.7486	1.71e-19	2.08e-16	yes	down	97.435	0.222941	79.55	86.21	90.91	87.72	128.3	111.92	0	0.81	0.09	0.02	0.04	0	0.47	0.27	0	1.01	0.49	0.03	0.1	0	0.15	0.23	0.08	XP_022817958.1(uncharacterized protein LOC111350563 [Spodoptera litura])
TRINITY_DN54647_c0_g1	0.000400626	-11.2855	2.08e-19	2.51e-16	yes	down	28.685	0.0123529	28.47	17.52	26.83	34.05	40.69	24.55	0.03	0	0	0	0	0	0	0	0	0	0	0.02	0.03	0	0.13	0	0	XP_022815919.1(uncharacterized protein LOC111349161 [Spodoptera litura])
TRINITY_DN56544_c3_g3	0.000831613	-10.2318	2.08e-19	2.51e-16	yes	down	856.733	0.727059	1063.06	872.27	721.7	823.43	911.39	748.55	0	0	0	0	0	0	6.03	0	0	0	3.44	2.89	0	0	0	0	0	XP_022816929.1(calphotin-like [Spodoptera litura])
TRINITY_DN59359_c0_g1	0.000640375	-10.6088	2.09e-19	2.5e-16	yes	down	6.52667	0.00411765	5.82	3.16	2.63	5.13	16.38	6.04	0.05	0	0	0	0	0	0	0	0	0	0	0	0	0	0.02	0	0	XP_022830282.1(uncharacterized protein LOC111359075 isoform X2 [Spodoptera litura])
TRINITY_DN56951_c0_g1	0.000331713	-11.5578	2.25e-19	2.67e-16	yes	down	587.633	0.277059	569.4	691.58	605.96	589.83	480.52	588.51	0.41	0.13	0.38	0	0.06	0	0.17	0.65	0	0.2	0.06	0.16	0	0.18	0.78	0.55	0.98	XP_022815733.1(trypsin, alkaline C-like [Spodoptera litura])
TRINITY_DN64508_c0_g1	0.00196392	-8.99205	2.31e-19	2.73e-16	yes	down	1.89167	0.00176471	2.54	1.84	1.83	1.29	1.75	2.1	0	0	0	0	0	0	0	0	0	0	0	0	0	0	0	0.03	0	None
TRINITY_DN51885_c0_g1	0.000558831	-10.8053	2.31e-19	2.72e-16	yes	down	102.838	0.0805882	104.24	124.03	58.83	75.72	133.77	120.44	0.12	0.04	0	0.02	0.1	0.02	0.27	0.18	0.02	0.02	0	0.02	0.1	0.08	0.26	0.06	0.06	XP_022817989.1(uncharacterized protein LOC111350592 [Spodoptera litura])
TRINITY_DN56365_c1_g2	0.000479406	-11.0265	2.79e-19	3.26e-16	yes	down	836.147	0.503529	853.06	1424.71	139.84	824.65	1132.77	641.85	0.12	0.11	0.43	0.24	0.14	0.12	1.71	0.32	0.72	0.36	0.15	0	1.26	0.46	0.28	2	0.14	XP_022834176.1(probable salivary secreted peptide [Spodoptera litura])
TRINITY_DN60430_c2_g3	0.000784452	-10.316	2.9e-19	3.37e-16	yes	down	14.5717	0.0117647	13.78	14.95	11.58	14.63	19.44	13.05	0	0	0	0	0	0	0	0	0.1	0	0	0	0	0	0	0	0.1	XP_022828067.1(uncharacterized protein LOC111357555 [Spodoptera litura])
TRINITY_DN60599_c3_g1	0.000306688	-11.6709	2.92e-19	3.37e-16	yes	down	164.195	0.0723529	165.49	244.81	95.99	266.82	102.94	109.12	0	0	0.29	0.17	0	0	0	0.32	0.05	0	0	0	0	0	0	0.04	0.36	None
TRINITY_DN18263_c0_g1	0.00110473	-9.82209	2.95e-19	3.39e-16	yes	down	241.213	0.227647	312.52	329	112.72	225.34	258.63	209.07	0	0	0	1.17	0	0	0	0	0	0	1.39	0	1.31	0	0	0	0	XP_022832131.1(carboxypeptidase B-like [Spodoptera litura])
TRINITY_DN58384_c2_g1	0.00243381	-8.68257	2.99e-19	3.42e-16	yes	down	3.92	0.00411765	3.26	3.98	3.74	3.93	4.92	3.69	0	0	0.07	0	0	0	0	0	0	0	0	0	0	0	0	0	0	None
TRINITY_DN56285_c0_g1	0.00219182	-8.83365	3e-19	3.41e-16	yes	down	33.4133	0.107059	39.62	24.66	32.08	21.52	38.87	43.73	0.08	0.04	0.14	0.13	0.07	0	0	0.35	0.04	0.04	0.19	0.09	0.09	0.1	0.1	0.25	0.11	XP_022823740.1(uncharacterized protein LOC111354492 [Spodoptera litura])
TRINITY_DN59537_c0_g1	0.0125061	-6.32122	3.06e-19	3.46e-16	yes	down	28.8383	0.510588	31.16	26.13	27.49	26.76	32.44	29.05	0.34	0.54	0.55	0.38	0.28	0.42	0.51	0.58	0.25	0.16	0.46	0.39	0.23	0.27	0.75	1.56	1.01	XP_022826034.1(homeotic protein labial-like [Spodoptera litura])
TRINITY_DN59281_c4_g2	0.0272938	-5.19528	3.16e-19	3.56e-16	yes	down	32.1433	12.4394	40.42	32.07	16.63	40.28	25.78	37.68	13.54	14.4	13.26	3.81	10.34	6.33	6.98	30.72	17.29	10.03	7.59	10.72	5.73	10.16	22.67	12.32	15.58	XP_022825034.1(putative serine protease K12H4.7 [Spodoptera litura])
TRINITY_DN58170_c0_g1	0.00157433	-9.31104	3.17e-19	3.54e-16	yes	down	1435.41	1.87412	1707.54	1962.91	999.56	1302.09	1481.17	1159.21	0.93	0.99	1.42	2.55	2.47	2.66	1.38	1.46	0.62	2.56	1.24	1.77	3.23	3.22	2.28	0.34	2.74	PCG65221.1(hypothetical protein B5V51_9508 [Heliothis virescens])
TRINITY_DN44081_c0_g1	0.000994373	-9.97393	3.28e-19	3.66e-16	yes	down	352.23	0.236471	385.19	331.03	191.75	340.83	492.2	372.38	0	0	0.39	0	0	0.35	0	0	0	2.47	0	0	0	0	0	0.81	0	None
TRINITY_DN59912_c0_g1	0.000979826	-9.99519	3.35e-19	3.7e-16	yes	down	18.7533	0.0235294	17.35	19.35	21.19	14.17	18.33	22.13	0	0	0.03	0	0.03	0	0.03	0	0	0.03	0.03	0.11	0.03	0	0.06	0	0.05	XP_022837912.1(uncharacterized protein LOC111365022 [Spodoptera litura])
TRINITY_DN58139_c3_g4	0.000708978	-10.462	3.58e-19	3.94e-16	yes	down	48.77	0.0482353	78.46	70.4	44.25	83.8	9.25	6.46	0.06	0.12	0.23	0.05	0	0	0.05	0.05	0.06	0	0	0.04	0	0.05	0.05	0.06	0	XP_022817942.1(uncharacterized protein LOC111350556 [Spodoptera litura])
TRINITY_DN54788_c0_g2	0.00095192	-10.0369	3.6e-19	3.94e-16	yes	down	1185.47	1.04412	1458.7	471.11	2381.68	1712.45	530.55	558.36	0	0	4.12	0	0	0	0	4.27	0	0	0	0	4.63	0	0	4.73	0	XP_022816373.1(larval cuticle protein 1-like [Spodoptera litura])
TRINITY_DN70869_c0_g1	0.0052699	-7.56801	3.63e-19	3.95e-16	yes	down	75.7467	0.561765	65.23	59.22	82.64	64.26	95.94	87.19	0.42	0.64	0.26	0.16	0.28	0.39	0.31	1.67	0.8	0.54	0.48	0.39	0.77	0.33	1.49	0.04	0.58	XP_022814617.1(uncharacterized protein LOC111348285 [Spodoptera litura])
TRINITY_DN39098_c0_g2	0.000736122	-10.4078	4.14e-19	4.49e-16	yes	down	35.6783	0.0352941	33.74	28.59	24.94	28.82	56.05	41.93	0	0.05	0.02	0	0	0.02	0.03	0.06	0.07	0.06	0	0	0.05	0	0.14	0.07	0.03	XP_022822321.1(venom carboxylesterase-6-like [Spodoptera litura])
TRINITY_DN53335_c0_g2	0.000328574	-11.5715	4.43e-19	4.77e-16	yes	down	188.055	0.0735294	180.08	223.24	141.4	189.84	170.1	223.67	0	0.08	0.19	0.08	0.23	0.18	0	0	0	0	0	0	0	0	0	0.49	0	XP_022824830.1(mucin-2-like [Spodoptera litura])
TRINITY_DN57887_c0_g2	0.00127438	-9.61599	4.51e-19	4.84e-16	yes	down	365.032	0.772941	402.26	459.41	359.66	333.9	282.47	352.49	0.44	1.13	0.66	0.16	0.1	0.29	2.59	1.31	0.27	0.38	0.9	0.19	0.56	0.23	1.09	1.25	1.59	XP_022822755.1(uncharacterized protein LOC111353804 [Spodoptera litura])
TRINITY_DN57572_c2_g1	0.000309245	-11.659	4.72e-19	5.04e-16	yes	down	72.29	0.0282353	70.04	102.13	46.08	110.7	46.24	58.55	0	0	0.14	0	0.03	0	0	0.05	0.02	0	0.06	0	0	0.09	0.01	0.08	0	BBA22702.1(pneumococcal surface protein [Streptococcus pneumoniae])
TRINITY_DN62458_c2_g2	0.00145676	-9.42302	5.13e-19	5.45e-16	yes	down	19.7	0.0235294	18.39	21.08	21.61	13.79	21.51	21.82	0	0	0	0	0	0	0	0.12	0	0	0	0	0	0	0.14	0.14	0	None
TRINITY_DN54849_c1_g1	0.000643023	-10.6028	5.41e-19	5.72e-16	yes	down	45.4517	0.0494118	40.09	51.87	40.31	43.19	45.16	52.09	0	0.01	0.1	0.03	0.1	0.03	0.09	0.05	0	0	0	0	0.06	0.05	0.03	0.29	0	XP_022818053.1(acetylcholinesterase-like [Spodoptera litura])
TRINITY_DN55240_c0_g1	0.000993699	-9.9749	5.66e-19	5.95e-16	yes	down	8.60333	0.00705882	9.61	14.28	4.71	3.75	8.74	10.53	0.04	0	0	0	0	0	0	0	0.08	0	0	0	0	0	0	0	0	PCG78876.1(hypothetical protein B5V51_2837 [Heliothis virescens])
TRINITY_DN61281_c4_g1	0.000475019	-11.0397	6.5e-19	6.8e-16	yes	down	35.1033	0.0494118	38.1	41.34	31.83	33.2	40.49	25.66	0	0.06	0.18	0	0.06	0	0	0	0.11	0.03	0.14	0	0	0	0.05	0.16	0.05	XP_022817976.1(uncharacterized protein LOC111350579 [Spodoptera litura])
TRINITY_DN58149_c3_g1	0.000405579	-11.2677	6.57e-19	6.84e-16	yes	down	667.113	0.363529	604.01	533.37	978.71	774.11	621.34	491.14	0.19	0.06	0.57	0.11	0.05	0.2	0.53	0.15	0	0.12	0.12	0.15	0.22	0.22	0.11	2.71	0.67	XP_022831663.1(fatty acid-binding protein 1-like [Spodoptera litura])
TRINITY_DN57408_c2_g3	0.000437308	-11.1591	6.63e-19	6.86e-16	yes	down	153.832	0.0905882	116.77	136.3	127.33	174.95	174.45	193.19	0	0.15	0.59	0.28	0.07	0	0.07	0	0.07	0.24	0	0	0	0	0	0	0.07	None
TRINITY_DN63845_c25_g1	0.00239316	-8.70687	7e-19	7.21e-16	yes	down	37.1317	0.0388235	48.9	43.74	22.1	26.9	43.21	37.94	0	0	0	0	0	0	0	0	0	0	0	0	0	0.66	0	0	0	None
TRINITY_DN58139_c3_g3	0.000485602	-11.0079	7.81e-19	8.01e-16	yes	down	259.717	0.154118	319.19	301.48	209.39	376.77	215.08	136.39	0	0	0	0	0.11	0.52	0.13	0.11	0.12	0.15	0	0	0.51	0.12	0	0	0.85	XP_022817942.1(uncharacterized protein LOC111350556 [Spodoptera litura])
TRINITY_DN12088_c0_g1	0.00267478	-8.54636	8.02e-19	8.19e-16	yes	down	6.90833	0.00823529	6.87	4.01	7.21	6.42	7.63	9.31	0	0	0	0	0	0	0	0	0	0	0	0	0	0	0	0	0.14	None
TRINITY_DN53350_c0_g10	0.00069048	-10.5001	8.15e-19	8.28e-16	yes	down	251.178	0.232353	238.99	395.75	198.01	115.6	205.92	352.8	0.11	0.21	0.1	0.1	0.2	0.09	0.48	0.45	0	0	0	0.09	0	0.1	0.5	0.31	1.21	XP_022821661.1(trypsin, alkaline C-like [Spodoptera litura])
TRINITY_DN45810_c0_g1	0.00119998	-9.70278	9.06e-19	9.16e-16	yes	down	55.2333	0.0664706	59.56	68.56	32.63	46.58	62.45	61.62	0	0	0	0	0	0.47	0	0.21	0.23	0	0	0	0	0.22	0	0	0	None
TRINITY_DN17898_c0_g1	0.000561843	-10.7975	9.24e-19	9.3e-16	yes	down	107.073	0.0705882	129.67	150.72	90.74	73.67	103.85	93.79	0	0	0.1	0	0.09	0	0.45	0.09	0	0	0	0.08	0	0	0	0.1	0.29	XP_022832017.1(carboxypeptidase B-like [Spodoptera litura])
TRINITY_DN512_c0_g1	0.00106909	-9.8694	9.76e-19	9.77e-16	yes	down	39.1467	0.0552941	38.44	33.28	36.47	31.96	48.06	46.67	0.09	0.08	0	0	0	0	0.11	0.14	0	0.09	0	0.03	0.12	0	0.04	0.08	0.16	XP_022814251.1(superoxide dismutase [Cu-Zn]-like [Spodoptera litura])
TRINITY_DN52706_c1_g2	0.000809658	-10.2704	1.02e-18	1.02e-15	yes	down	313.713	0.438235	380.69	341.17	359.4	346.4	244.73	209.89	0.13	0.02	0.49	0.47	0.32	0.41	0.45	1.36	0.02	0	0.11	0.9	0.52	0.33	0.7	0.25	0.97	XP_022821250.1(maltase 2-like [Spodoptera litura])
TRINITY_DN58538_c0_g1	0.00130361	-9.58327	1.02e-18	1.01e-15	yes	down	100.902	0.287647	159.87	149.67	56.33	20.4	108.51	110.63	0.07	0.13	0.27	0.43	0.1	0.04	0.21	0.56	0.17	0.65	0.02	0.15	0.21	0.05	0.3	1.26	0.27	XP_022828345.1(uncharacterized protein LOC111357771 [Spodoptera litura])
TRINITY_DN39692_c0_g2	0.000516716	-10.9183	1.07e-18	1.05e-15	yes	down	64.045	0.0382353	46.5	63.3	46.79	45.76	104.41	77.51	0	0.05	0.05	0.05	0	0	0.29	0	0.05	0.11	0	0	0	0	0	0	0.05	PCG70881.1(hypothetical protein B5V51_2488 [Heliothis virescens])
TRINITY_DN61706_c1_g1	0.027204	-5.20004	1.07e-18	1.05e-15	yes	down	42.615	2.58294	57.65	32.59	39.42	44.47	57.47	24.09	0.73	0.84	0.61	1.38	1.59	4.79	5.31	4.69	1.16	0.81	1.48	3.21	1.19	1.95	4.75	7.18	2.24	XP_022832036.1(O-acyltransferase like protein-like [Spodoptera litura])
TRINITY_DN51833_c0_g1	0.00119515	-9.70859	1.12e-18	1.1e-15	yes	down	17.78	0.0217647	24.51	21.67	8.11	17.45	20.29	14.65	0.1	0	0.18	0	0	0	0	0	0	0	0	0	0	0	0	0	0.09	XP_022824551.1(soluble scavenger receptor cysteine-rich domain-containing protein SSC5D-like [Spodoptera litura])
TRINITY_DN59697_c1_g3	0.00056976	-10.7774	1.15e-18	1.12e-15	yes	down	24.2667	0.0147059	21.75	17.87	34.1	37.31	16.92	17.65	0	0	0.17	0	0	0	0	0	0	0	0	0	0	0	0.08	0	0	None
TRINITY_DN841_c0_g1	0.00139919	-9.48119	1.38e-18	1.34e-15	yes	down	212.97	0.414118	220.01	208.62	232.23	191.25	218.53	207.18	0.1	0.38	0.46	0	0.09	0.79	0.6	0.32	0.09	1.01	0	0.39	0.09	0.09	0.27	1.28	1.08	None
TRINITY_DN59041_c2_g1	75.4908	6.23823	1.42e-18	1.37e-15	yes	up	0.26	22.0153	0.41	0.19	0.23	0.15	0.2	0.38	22.11	20.61	21.54	14.81	14.63	15.97	22.54	20.43	27	30.18	30.45	20.07	15.48	19.86	30.73	27.02	20.83	PCG74574.1(hypothetical protein B5V51_13096 [Heliothis virescens])
TRINITY_DN61269_c2_g1	0.00717797	-7.12221	1.45e-18	1.39e-15	yes	down	80.1167	3.57	91.53	105.33	62.3	70.93	76.66	73.95	4.31	6.92	6.5	0.12	1.57	3.63	0.66	0.09	4.42	6.52	4.63	4.79	1.53	2.41	0.73	1.18	10.68	None
TRINITY_DN24692_c0_g1	0.00101807	-9.93994	1.52e-18	1.45e-15	yes	down	3716.66	4.57118	6473.02	4007.98	3005.71	2802.06	3920.92	2090.24	0	6.43	10.68	0	0	0	11.99	0	11.11	5.41	5.2	0	0	4.77	0	0	22.12	None
TRINITY_DN61245_c3_g1	0.00162223	-9.26781	1.57e-18	1.49e-15	yes	down	61.4317	0.0747059	58.72	103.98	62.53	41.82	24.73	76.81	0	0	0	0	0	0	0	0	0	0	0.65	0	0	0	0	0.62	0	None
TRINITY_DN36230_c0_g1	0.000841461	-10.2148	1.6e-18	1.52e-15	yes	down	40.8467	0.0394118	43.95	42.8	40.98	38.17	38.6	40.58	0	0	0	0.09	0	0	0	0	0	0.41	0	0.08	0	0	0	0	0.09	XP_022825581.1(putative serine protease K12H4.7 [Spodoptera litura])
TRINITY_DN61382_c6_g2	0.00134792	-9.53505	1.64e-18	1.55e-15	yes	down	95.015	0.180588	84.53	168.61	184.16	37.7	45.62	49.47	0.1	0.32	0.15	0.37	0.07	0.1	0.5	0.21	0.22	0.12	0	0.12	0	0.33	0.35	0.07	0.04	XP_022820790.1(myrosinase 1-like [Spodoptera litura])
TRINITY_DN44725_c0_g1	0.00316911	-8.30171	1.78e-18	1.67e-15	yes	down	360.335	0.402353	391.36	223.68	381.59	272.53	445.96	446.89	0	0	0	0	0	0	0	0	6.84	0	0	0	0	0	0	0	0	None
TRINITY_DN32875_c0_g1	0.00273138	-8.51616	1.81e-18	1.69e-15	yes	down	355.36	0.447647	342.46	484.3	289.5	397.77	247.22	370.91	0	0	0	0	0	0	7.61	0	0	0	0	0	0	0	0	0	0	None
TRINITY_DN58574_c2_g1	0.000595401	-10.7139	1.82e-18	1.69e-15	yes	down	26.3083	0.0323529	36.98	33.71	8.55	18.05	45.33	15.23	0.08	0.02	0.17	0	0.07	0	0	0	0.02	0.07	0	0.09	0.02	0	0	0.01	0	XP_022827863.1(juvenile hormone esterase-like [Spodoptera litura])
TRINITY_DN55375_c1_g3	0.00303007	-8.36643	1.86e-18	1.73e-15	yes	down	139.203	0.629412	143.94	123.45	116.56	171.64	152	127.63	0.6	0.21	0.96	1.89	1.6	0.54	0.06	0.48	0.45	0.66	0.94	0.98	0.45	0.18	0.18	0.42	0.1	XP_019745154.1(PREDICTED: histidine-rich glycoprotein-like [Hippocampus comes])
TRINITY_DN63274_c3_g3	0.00519679	-7.58816	2.02e-18	1.86e-15	yes	down	31.1633	0.221765	28.29	38.19	27.47	26.04	29.52	37.47	0.11	0.05	0.03	0.74	0.29	0.38	0.15	0.09	0.13	0.14	0.11	0.13	0.2	0.18	0.37	0.36	0.31	XP_022837314.1(uncharacterized protein LOC111364621 [Spodoptera litura])
TRINITY_DN55901_c2_g1	0.000917867	-10.0894	2.15e-18	1.98e-15	yes	down	105.397	0.134706	101.17	167.16	60.24	102.89	69.17	131.75	0.1	0.05	0.19	0	0.22	0	0.18	0.24	0.05	0.2	0.05	0	0	0.09	0.05	0.55	0.32	XP_022833638.1(pancreatic lipase-related protein 2-like [Spodoptera litura])
TRINITY_DN57687_c0_g1	0.00160341	-9.28464	2.42e-18	2.21e-15	yes	down	97.25	0.21	86.31	85.28	142.5	89.01	92.02	88.38	0.25	0.35	0.12	0.32	0.33	0.2	0	0.1	0	0.14	0	0.43	0.97	0.24	0	0	0.12	AKT26493.1(chemosensory protein 19 [Spodoptera exigua])
TRINITY_DN102207_c0_g1	0.000710127	-10.4596	2.5e-18	2.27e-15	yes	down	35.3	0.0294118	34.05	20.34	20.91	29.8	65.89	40.81	0	0.04	0	0	0.03	0.12	0.06	0.06	0	0.04	0	0.15	0	0	0	0	0	PCG78823.1(hypothetical protein B5V51_2981 [Heliothis virescens])
TRINITY_DN59371_c3_g2	0.000477544	-11.0321	2.61e-18	2.36e-15	yes	down	929.22	0.629412	1076	1458.18	606	656.82	835.54	942.78	0.16	0.22	0.86	0.13	0.07	0.23	1.3	1.55	0.07	0.19	0.15	0.18	0.17	0.14	1.77	2.9	0.61	XP_022837965.1(uncharacterized protein LOC111365035 [Spodoptera litura])
TRINITY_DN103819_c0_g1	0.00131509	-9.57062	3.07e-18	2.77e-15	yes	down	36.5717	0.0541176	30.96	30.08	31.4	34.71	52.42	39.86	0	0.46	0.15	0	0	0	0	0	0	0	0.16	0	0	0	0	0.15	0	None
TRINITY_DN59960_c1_g2	0.00157474	-9.31067	3.13e-18	2.81e-15	yes	down	28.4367	0.108235	25.43	23.94	63.59	28.14	15.5	14.02	0.09	0.03	0	0.07	0.15	0.18	0.07	0.03	0.04	0.07	0.04	0.11	0.9	0	0	0.04	0.02	XP_022820325.1(maltase A1-like [Spodoptera litura])
TRINITY_DN49539_c1_g1	0.00053522	-10.8676	3.39e-18	3.03e-15	yes	down	184.218	0.127059	308.85	191.08	98.02	185.47	204.07	117.82	1.09	0	0.33	0.16	0	0.14	0	0.44	0	0	0	0	0	0	0	0	0	None
TRINITY_DN53447_c0_g1	0.00110678	-9.81942	3.4e-18	3.03e-15	yes	down	22.625	0.0305882	17.05	27.24	29.76	21.95	17.57	22.18	0.16	0.05	0.1	0	0	0	0.04	0.08	0	0	0	0	0.09	0	0	0	0	XP_022824665.1(uncharacterized protein LOC111355145 [Spodoptera litura])
TRINITY_DN54832_c0_g1	0.00149239	-9.38816	3.81e-18	3.38e-15	yes	down	44.355	0.0558824	38.77	23.58	23.13	28.38	112.35	39.92	0	0	0	0.25	0.2	0	0	0	0.27	0	0	0.23	0	0	0	0	0	None
TRINITY_DN31349_c0_g1	0.00208633	-8.90481	3.86e-18	3.41e-15	yes	down	164.742	0.225294	91.35	323.24	212.67	124.33	98.43	138.43	0	0	0	0	0	1.84	0	1.99	0	0	0	0	0	0	0	0	0	PCG79271.1(hypothetical protein B5V51_1362 [Heliothis virescens])
TRINITY_DN123917_c0_g1	0.0014905	-9.38999	4.59e-18	4.04e-15	yes	down	6.88833	0.0129412	7.53	6.82	8.16	5.56	6.4	6.86	0.04	0	0.02	0.03	0	0.02	0	0	0.02	0	0	0	0	0.05	0	0	0.04	XP_022817698.1(esterase FE4-like [Spodoptera litura])
TRINITY_DN54301_c0_g1	0.00094016	-10.0548	4.81e-18	4.21e-15	yes	down	254.485	0.339412	293.53	168.94	229.73	225.21	191.13	418.37	0	0.13	0.09	0.22	0.09	0.08	1.25	0.12	0.23	0.15	0.18	0.04	0.66	0.13	0.71	0.96	0.73	XP_022826477.1(brachyurin-like [Spodoptera litura])
TRINITY_DN37152_c0_g1	0.00085424	-10.1931	5.49e-18	4.79e-15	yes	down	105.608	0.110588	116.78	84.94	107.12	102.28	117.49	105.04	0.1	0	0.26	0.08	0.16	0	0.56	0.23	0	0	0	0.15	0	0	0	0.26	0.08	None
TRINITY_DN60742_c1_g9	0.00111508	-9.80864	5.68e-18	4.93e-15	yes	down	299.228	0.430588	437.72	522.49	262.32	165.83	232.49	174.52	0	0	1.32	0	0	1.18	0	1.24	0.46	0.5	0	0.39	0	0	1.81	0	0.42	None
TRINITY_DN31629_c0_g1	0.00126334	-9.62854	5.77e-18	4.99e-15	yes	down	16.5417	0.0294118	16.42	12.04	14.22	18.12	23.91	14.54	0.07	0.03	0.12	0	0	0.03	0	0.03	0	0.17	0	0.02	0	0	0	0.03	0	XP_022828066.1(uncharacterized protein LOC111357554 [Spodoptera litura])
TRINITY_DN51555_c1_g1	0.00152599	-9.35604	5.81e-18	5e-15	yes	down	24.96	0.0194118	22.01	60.45	20.92	15.81	2.75	27.82	0.33	0	0	0	0	0	0	0	0	0	0	0	0	0	0	0	0	XP_022823846.1(uncharacterized protein LOC111354551 [Spodoptera litura])
TRINITY_DN43846_c0_g1	0.00152318	-9.3587	7.07e-18	6.07e-15	yes	down	37.3733	0.0676471	37.2	53.41	43.13	34.9	38.02	17.58	0	0.16	0	0	0	0.14	0	0	0.16	0.52	0.17	0	0	0	0	0	0	None
TRINITY_DN55670_c0_g1	0.00749651	-7.05956	7.64e-18	6.52e-15	yes	down	23.1533	0.236471	19.57	14.76	26.52	27.93	27.91	22.23	0.2	0.23	0.38	0.55	0.47	0.21	0	0.22	0.27	0.31	0.16	0.23	0.3	0.21	0.11	0.03	0.14	XP_022831897.1(uncharacterized protein LOC111360250 [Spodoptera litura])
TRINITY_DN59351_c0_g1	0.00383659	-8.02596	8e-18	6.8e-15	yes	down	2.045	0.00352941	1.67	2.78	1.75	2.93	1.46	1.68	0	0	0	0	0	0	0	0	0	0	0.06	0	0	0	0	0	0	PCG62852.1(hypothetical protein B5V51_13501, partial [Heliothis virescens])
TRINITY_DN58563_c3_g1	0.000860371	-10.1828	8.8e-18	7.45e-15	yes	down	13.3083	0.0170588	10.97	10.25	26.04	9.05	13.9	9.64	0.02	0.02	0.05	0	0	0	0.02	0.07	0.02	0	0	0	0	0	0.06	0.03	0	XP_022823837.1(uncharacterized protein LOC111354546 [Spodoptera litura])
TRINITY_DN56365_c1_g1	0.000442318	-11.1426	8.91e-18	7.52e-15	yes	down	691.828	0.358235	763.15	876.38	119.33	622.66	1132.66	636.79	0.11	0.22	1.06	0.14	0.25	0.13	0.22	1.58	0	0.12	0.05	0.34	0.1	0.15	0.1	0.29	1.23	AFH57159.1(REPAT39 [Spodoptera exigua])
TRINITY_DN56049_c0_g2	0.00204086	-8.93661	9.75e-18	8.19e-15	yes	down	298.31	0.787647	278.49	205.31	214.7	167.56	732.24	191.56	0.75	0.17	0.52	0.72	0.55	0.28	1.95	1.5	0	0	0.34	0.34	0.8	0.35	1.5	2.92	0.7	None
TRINITY_DN61846_c1_g3	0.00112872	-9.7911	1.01e-17	8.42e-15	yes	down	11.3367	0.0105882	5.21	2.17	6.96	9.62	28.75	15.31	0	0	0	0	0	0	0	0	0	0	0	0	0	0.12	0	0	0.06	PCG63932.1(hypothetical protein B5V51_11520 [Heliothis virescens])
TRINITY_DN58609_c0_g4	0.00181788	-9.10353	1.01e-17	8.45e-15	yes	down	357.495	0.413529	500.99	369.79	390.35	246.03	314.34	323.47	0	0	0	0	0	0	7.03	0	0	0	0	0	0	0	0	0	0	AAO75039.1(chymotrypsin precursor [Spodoptera frugiperda])
TRINITY_DN39076_c0_g1	0.00140655	-9.47362	1.02e-17	8.46e-15	yes	down	85.385	0.0905882	98.37	90.18	23.15	37.64	109.62	153.35	0	0	0	0	0	0	0	0.49	0	0	0	0	0	0	0	0	1.05	None
TRINITY_DN60742_c1_g5	0.000724282	-10.4312	1.08e-17	8.89e-15	yes	down	1110.97	0.965882	1451.55	1360.57	1163.1	673.42	1085.65	931.53	0	0	0	0	1.98	0	0	0	0	0	0	0	0	0	4.06	10.38	0	XP_022823681.1(high choriolytic enzyme 2-like [Spodoptera litura])
TRINITY_DN50788_c0_g1	0.00107217	-9.86525	1.12e-17	9.2e-15	yes	down	4.455	0.00352941	4.14	1.27	9.15	0.84	3.1	8.23	0	0	0.02	0	0	0	0	0	0.04	0	0	0	0	0	0	0	0	XP_022815146.1(O-acyltransferase like protein-like [Spodoptera litura])
TRINITY_DN58434_c1_g1	0.00147942	-9.40075	1.15e-17	9.46e-15	yes	down	44.13	0.0423529	43.92	29.33	65.21	55.68	45.82	24.82	0.11	0.05	0.07	0	0	0	0	0	0.26	0.12	0	0.11	0	0	0	0	0	XP_022829288.1(dentin sialophosphoprotein-like [Spodoptera litura])
TRINITY_DN58825_c0_g1	0.00236021	-8.72687	1.25e-17	1.02e-14	yes	down	1.005	0.00117647	1.12	1.02	1.5	0.19	1.03	1.17	0	0	0.01	0	0	0	0	0	0	0	0	0	0	0	0	0	0.01	XP_021183115.1(uncharacterized protein LOC110371281 isoform X1 [Helicoverpa armigera])
TRINITY_DN61720_c1_g1	0.00117492	-9.73322	1.3e-17	1.05e-14	yes	down	27.3983	0.0388235	24.52	30.98	26.65	24.14	27.37	30.73	0.05	0	0	0	0	0	0.2	0.11	0.04	0.05	0	0	0	0	0.04	0.04	0.13	XP_022818112.1(esterase FE4-like [Spodoptera litura])
TRINITY_DN53723_c0_g1	0.00289588	-8.43178	1.33e-17	1.08e-14	yes	down	6.885	0.0111765	1.7	2.13	23.88	3.98	5.83	3.79	0	0	0	0	0	0	0	0.19	0	0	0	0	0	0	0	0	0	XP_022831971.1(epididymal secretory protein E1-like [Spodoptera litura])
TRINITY_DN59388_c1_g2	0.00334641	-8.22317	1.35e-17	1.09e-14	yes	down	338.658	0.574118	327.99	395.52	219.42	424.66	406.39	257.97	0	0	0.04	0.13	0	0.03	4.27	4.49	0	0.17	0.12	0.17	0.05	0.04	0.05	0.13	0.07	None
TRINITY_DN53147_c1_g1	0.00221576	-8.81798	1.35e-17	1.09e-14	yes	down	60.21	0.182941	53.75	70.99	106.82	27.58	55.16	46.96	0	0.17	0.1	0.3	0.34	0.23	0.09	0.09	0.17	0.03	0.07	0.56	0.38	0.29	0.03	0.26	0	XP_022823168.1(uncharacterized protein LOC111354110 [Spodoptera litura])
TRINITY_DN57986_c2_g2	0.0005378	-10.8606	1.42e-17	1.14e-14	yes	down	177.508	0.127647	249.79	253.77	117.96	183.12	159.96	100.45	0.07	0.2	0.18	0	0.06	0	0.67	0.15	0	0.04	0.03	0.11	0	0.06	0.12	0.35	0.13	XP_022824800.1(pancreatic triacylglycerol lipase-like [Spodoptera litura])
TRINITY_DN60444_c1_g1	0.0115157	-6.44026	1.47e-17	1.17e-14	yes	down	19.6617	0.31	17.18	13.77	14	19.48	32.18	21.36	0.12	0.18	0.2	0.37	0.6	0.48	0.17	0.06	0.35	0.29	0.35	0.5	0.53	0.66	0.13	0.09	0.19	XP_022817049.1(histidine decarboxylase isoform X2 [Spodoptera litura])
TRINITY_DN61454_c10_g2	0.00261112	-8.58111	1.47e-17	1.17e-14	yes	down	2.34333	0.00529412	2.08	1.94	3.27	1.84	3.85	1.08	0	0.03	0	0	0	0	0	0	0.03	0	0.03	0	0	0	0	0	0	XP_022823554.1(uncharacterized protein LOC111354356 [Spodoptera litura])
TRINITY_DN58153_c0_g1	0.0336785	-4.89203	1.55e-17	1.23e-14	yes	down	12.285	0.784118	14.45	10.25	8.92	16.55	10.59	12.95	0.41	1.01	1.22	0.54	0.85	0.81	1.34	0.46	0.64	0.69	0.46	0.85	0.87	0.62	0.66	0.82	1.08	AMO44417.1(carboxylesterase [Helicoverpa armigera])
TRINITY_DN57399_c2_g2	0.00660233	-7.24281	1.69e-17	1.34e-14	yes	down	175.707	2.08118	107.93	347.23	223.42	87.08	40.75	247.83	2.18	1.56	1.25	3.12	2.52	3.76	4.35	2.43	3.53	2.09	1.85	2.16	1.55	2.11	0.63	0.18	0.11	XP_022829690.1(high affinity copper uptake protein 1-like [Spodoptera litura])
TRINITY_DN61736_c0_g1	0.0042147	-7.89035	1.74e-17	1.37e-14	yes	down	1.20667	0.00235294	0.95	1.59	0.68	1.36	1.65	1.01	0	0	0	0	0	0	0	0	0	0.04	0	0	0	0	0	0	0	None
TRINITY_DN59348_c4_g1	0.00142555	-9.45427	1.74e-17	1.36e-14	yes	down	110.955	0.16	117.58	133.57	61.6	110.7	112.17	130.11	0	0	0.46	0	0	0	1.3	0	0	0	0.52	0	0	0	0	0	0.44	XP_022814470.1(uncharacterized protein LOC111348189 [Spodoptera litura])
TRINITY_DN48741_c0_g1	0.00129145	-9.59679	1.74e-17	1.36e-14	yes	down	31.785	0.0494118	16.1	9.6	59.07	35.35	27.05	43.54	0	0	0	0	0.21	0.09	0	0.1	0	0.06	0.06	0	0.05	0.16	0	0.11	0	XP_022815739.1(trypsin CFT-1-like [Spodoptera litura])
TRINITY_DN63106_c16_g2	0.00150048	-9.38036	1.78e-17	1.38e-14	yes	down	9.34167	0.0170588	5.49	8.36	11.11	8.95	11.55	10.59	0	0.03	0.03	0	0	0	0.03	0	0	0.03	0	0	0	0	0	0.11	0.06	XP_022815142.1(arrestin domain-containing protein 2-like [Spodoptera litura])
TRINITY_DN60825_c2_g3	0.00126899	-9.6221	1.92e-17	1.49e-14	yes	down	119.898	0.281176	155.22	190.1	140.27	54.46	91.25	88.09	0	0.14	0	0	2.11	0.02	1.99	0	0.14	0.12	0	0.03	0	0	0	0.03	0.2	ALS30431.1(soluble alkaline phosphatase 1, partial [Spodoptera frugiperda])
TRINITY_DN44081_c1_g2	0.000536761	-10.8634	2.66e-17	2.05e-14	yes	down	91.8983	0.0582353	89.83	99.21	60.77	88.49	119.57	93.52	0	0	0	0	0.26	0	0	0.08	0	0	0	0	0	0	0	0.65	0	XP_022816901.1(uncharacterized protein LOC111349853 isoform X13 [Spodoptera litura])
TRINITY_DN55576_c0_g2	0.00647675	-7.27051	2.88e-17	2.21e-14	yes	down	134.748	1.20647	133.67	149.04	147.6	117.88	117.47	142.83	0.21	0.62	0.73	2.48	1.86	1.73	0.36	0.45	1.11	1.4	0.99	2.87	2.85	1.89	0.4	0.11	0.45	XP_022831349.1(collagenase-like [Spodoptera litura])
TRINITY_DN36289_c0_g1	0.00192133	-9.02368	2.9e-17	2.23e-14	yes	down	299.43	0.424706	231.96	437.15	267.67	310.01	68.38	481.41	0	0	0	0	0	0	0	0	0	0	0	0	0	0	7.22	0	0	None
TRINITY_DN60849_c6_g7	0.00483045	-7.69363	3.17e-17	2.42e-14	yes	down	19.37	0.0435294	18.47	26.58	12.33	19.31	16.94	22.59	0	0	0	0	0	0	0	0	0	0	0	0	0	0	0.74	0	0	None
TRINITY_DN20806_c0_g1	0.00133471	-9.54926	3.27e-17	2.49e-14	yes	down	15.5267	0.0241176	11.38	13.9	9.7	14.63	22.95	20.6	0	0	0	0	0	0	0.05	0	0	0.11	0	0	0	0	0.1	0	0.15	XP_022815521.1(homeobox protein notochord [Spodoptera litura])
TRINITY_DN61227_c1_g1	0.00161493	-9.27431	3.39e-17	2.57e-14	yes	down	10.1233	0.0135294	9.83	3.67	15.96	2.8	9.26	19.22	0	0	0	0	0	0	0	0	0	0	0	0	0.08	0.15	0	0	0	None
TRINITY_DN58915_c2_g4	0.00783814	-6.99527	3.45e-17	2.6e-14	yes	down	19.545	0.211176	16.03	19.43	27.22	10.87	29.54	14.18	0.21	0.23	0.58	0.21	0.07	0.03	0.39	0.03	0.11	0.16	0.2	0.42	0.48	0.07	0.18	0.07	0.15	PCG78250.1(hypothetical protein B5V51_4726 [Heliothis virescens])
TRINITY_DN56608_c1_g1	0.00137394	-9.50747	3.45e-17	2.6e-14	yes	down	267.06	0.508824	274.03	248.25	168.57	209.92	406.17	295.42	0	0.24	0.14	1.2	0.53	0.69	0	0.08	0.74	0.36	0.44	1.17	1.17	1.42	0.14	0.05	0.28	None
TRINITY_DN1439_c0_g1	0.00197335	-8.98514	4.1e-17	3.07e-14	yes	down	24.4467	0.0494118	27.05	24.23	23.74	14.04	27.54	30.08	0	0.17	0.34	0	0	0	0	0	0	0	0	0	0.33	0	0	0	0	None
TRINITY_DN54219_c1_g1	0.00107657	-9.85934	4.14e-17	3.09e-14	yes	down	99.5483	0.183529	125.79	117.38	61.39	87.95	102.14	102.64	0.55	0.62	0.37	0.02	0.06	0.04	0.02	0.01	0.32	0.22	0.64	0.04	0.03	0.08	0.04	0.04	0.02	AAP44965.1(midgut class 2 aminopeptidase N [Spodoptera exigua])
TRINITY_DN57408_c2_g1	0.00279634	-8.48225	4.22e-17	3.14e-14	yes	down	4.76	0.0182353	4.67	5.05	2.58	4.11	7.73	4.42	0	0	0	0	0	0	0	0.04	0	0	0.27	0	0	0	0	0	0	KPJ13287.1(Maltase 1 [Papilio machaon])
TRINITY_DN52352_c1_g1	0.000781799	-10.3209	4.27e-17	3.17e-14	yes	down	220.038	0.221176	188.44	264.41	253.68	217.23	213.5	182.97	0.15	0	0.83	0	0.13	0	1.28	0	0.28	0	0.29	0.12	0	0.13	0	0.55	0	ABW98673.1(chitin-binding protein [Spodoptera exigua])
TRINITY_DN61586_c17_g3	0.00348114	-8.16622	4.63e-17	3.43e-14	yes	down	5.53667	0.0188235	3.99	3.64	6.3	5.8	7.19	6.3	0	0	0	0	0.06	0.06	0	0	0	0	0	0	0	0	0.06	0.07	0.07	AFH57134.1(REPAT14 [Spodoptera exigua])
TRINITY_DN38559_c0_g2	0.0510603	-4.29165	4.71e-17	3.47e-14	yes	down	17.6267	1.28588	20.96	13.14	20.71	8.26	24.17	18.52	1.58	0.98	1.08	1.67	1.34	1.19	0.38	1.53	1.19	1.38	1.59	1.62	1.84	1.2	1.23	1.04	1.02	XP_022834514.1(cytochrome P450 6k1-like [Spodoptera litura])
TRINITY_DN106615_c0_g1	0.00178346	-9.1311	4.84e-17	3.56e-14	yes	down	13.225	0.0205882	12.98	14.49	10.36	11.45	13.71	16.36	0	0	0	0	0	0	0.18	0.17	0	0	0	0	0	0	0	0	0	XP_022818053.1(acetylcholinesterase-like [Spodoptera litura])
TRINITY_DN151721_c0_g1	0.00445128	-7.81156	4.91e-17	3.59e-14	yes	down	18.15	0.0329412	26.88	16.82	20.19	9.97	24.73	10.31	0	0	0	0	0	0	0.56	0	0	0	0	0	0	0	0	0	0	None
TRINITY_DN50128_c0_g2	0.00222621	-8.8112	5.02e-17	3.66e-14	yes	down	48.3033	0.154118	63.51	57.22	21.83	32.91	56.55	57.8	0.02	0.1	0.12	0.09	0.09	0.21	0	0.03	0.2	0.19	0.29	0.09	0.54	0.41	0	0.22	0.02	XP_022835470.1(uncharacterized protein LOC111362929 [Spodoptera litura])
TRINITY_DN59920_c1_g3	0.0172067	-5.86088	5.27e-17	3.83e-14	yes	down	52.3417	1.39529	57.52	53.79	36.42	49.3	53.89	63.13	2.14	1.87	2.53	0.73	0.66	1.01	0.16	0.75	3.44	2.66	3.1	1.24	0.84	1.19	0.26	0.79	0.35	XP_022830993.1(sodium-dependent nutrient amino acid transporter 1-like [Spodoptera litura])
TRINITY_DN32818_c0_g1	0.00538971	-7.53558	5.32e-17	3.85e-14	yes	down	41.565	0.0976471	47.79	66.02	42.7	27.46	34.57	30.85	0	0	1.66	0	0	0	0	0	0	0	0	0	0	0	0	0	0	ACG69475.1(astacin [Spodoptera frugiperda])
TRINITY_DN94873_c0_g1	0.00226098	-8.78884	5.43e-17	3.92e-14	yes	down	32.9267	0.0988235	36.75	41.42	21.24	33.51	40.08	24.56	0	0.07	0	0	0.19	0.17	0.06	0.18	0	0.07	0.21	0.06	0.07	0.07	0	0	0.53	None
TRINITY_DN56691_c0_g2	0.00302134	-8.3706	5.45e-17	3.92e-14	yes	down	3.97833	0.00941177	5.81	3.29	1.96	3.37	4.64	4.8	0.16	0	0	0	0	0	0	0	0	0	0	0	0	0	0	0	0	PCG77915.1(hypothetical protein B5V51_5861 [Heliothis virescens])
TRINITY_DN57645_c0_g3	0.000740569	-10.3991	5.85e-17	4.19e-14	yes	down	21.43	0.0252941	20.68	13.31	21.49	22.14	29.58	21.38	0	0.01	0.04	0	0.01	0	0.09	0.02	0	0.03	0	0	0.05	0	0.01	0.17	0	XP_022825007.1(aminopeptidase N-like isoform X1 [Spodoptera litura])
TRINITY_DN60409_c1_g1	0.00131518	-9.57052	5.87e-17	4.19e-14	yes	down	191.26	0.635294	173.39	217.92	151.07	167.8	238.21	199.17	0	0	0.7	0.75	0.19	0.26	0.17	4.8	0.3	0	0	0.17	0.2	0.96	0.1	1.96	0.24	XP_022816896.1(uncharacterized protein LOC111349853 isoform X8 [Spodoptera litura])
TRINITY_DN52270_c0_g1	0.0194164	-5.68658	5.95e-17	4.24e-14	yes	down	12.6767	0.387059	13.26	18.15	15.13	17.33	4.49	7.7	0.27	0.42	0.81	0.1	0.42	0.12	0.27	0.3	0.35	0.42	0.21	0.28	0.16	0.71	0.61	0.53	0.6	XP_022830389.1(uncharacterized protein LOC111359163 [Spodoptera litura])
TRINITY_DN42556_c0_g1	0.00559113	-7.48264	6.35e-17	4.51e-14	yes	down	3.82667	0.00705882	4.3	2.33	3.96	2.87	2.97	6.53	0.12	0	0	0	0	0	0	0	0	0	0	0	0	0	0	0	0	None
TRINITY_DN62795_c1_g2	0.101677	-3.29794	6.98e-17	4.94e-14	yes	down	92.9567	14.3647	100.55	97.01	99.21	107.27	67	86.7	24.14	24.15	26.31	6.81	8.41	7.45	5.17	14.14	21.42	19.22	17.39	8.91	8.07	10.99	14.13	13.4	14.09	XP_022827396.1(zinc finger protein on ecdysone puffs isoform X1 [Spodoptera litura])
TRINITY_DN56714_c0_g1	0.00519	-7.59005	7.19e-17	5.07e-14	yes	down	390.877	3.05176	442.33	324.22	474.75	389.5	406.87	307.59	1.76	1.48	1.92	5.71	5.46	5.35	0.82	0.5	2.7	2.04	2.66	7.49	4.96	6.82	1.07	0.55	0.59	XP_022816175.1(larval cuticle protein LCP-22-like [Spodoptera litura])
TRINITY_DN28717_c0_g1	0.00200446	-8.96257	7.31e-17	5.13e-14	yes	down	13.0433	0.0282353	11.87	15.52	12.17	10.2	17.68	10.82	0	0	0	0	0	0	0	0	0	0	0	0.19	0.07	0	0.07	0	0.15	XP_022835149.1(uncharacterized protein LOC111362666 isoform X1 [Spodoptera litura])
TRINITY_DN58848_c0_g6	0.00978048	-6.67588	7.31e-17	5.12e-14	yes	down	14.2767	0.195294	10.68	10.47	19.54	5.22	23.9	15.85	0.21	0.04	0.02	0.08	0.32	0.13	0.06	0.29	0.23	0.14	0.26	0.29	0.29	0.31	0.04	0.15	0.46	XP_022828698.1(putative serine protease K12H4.7 [Spodoptera litura])
TRINITY_DN58942_c5_g1	0.0935525	-3.41808	8e-17	5.58e-14	yes	down	137.265	18.1829	150.26	146.59	99.61	126.73	156.78	143.62	11.72	11.16	13.04	26.84	23.83	21.87	13.98	14	16.95	17.77	17.7	23.13	20.57	22.5	15.61	22.9	15.54	XP_022824240.1(leucine-rich repeat neuronal protein 3-like [Spodoptera litura])
TRINITY_DN55514_c0_g1	0.00584899	-7.4176	8.31e-17	5.78e-14	yes	down	14.94	0.118824	17.54	12.04	12.3	12.86	16.09	18.81	0.12	0.07	0.14	0.24	0.16	0.31	0.18	0.09	0.06	0.05	0	0.13	0.16	0.08	0.04	0	0.19	XP_022827220.1(uncharacterized protein LOC111356966 [Spodoptera litura])
TRINITY_DN13187_c0_g1	0.00126596	-9.62555	8.36e-17	5.79e-14	yes	down	43.4883	0.0752941	32.89	46.3	19.01	30.08	76.77	55.88	0	0.05	0.02	0	0.02	0	0.13	0.13	0.03	0.02	0.07	0.03	0.05	0.02	0.26	0.22	0.23	XP_022831331.1(uncharacterized protein LOC111359869 [Spodoptera litura])
TRINITY_DN47995_c5_g1	0.00106656	-9.87283	8.66e-17	5.98e-14	yes	down	188.087	0.271176	185.56	191.92	157.47	161.58	243.34	188.65	0.24	0.15	0.44	0.03	0	0.06	0.94	0.68	0.11	0.19	0.15	0	0.07	0	0.52	0.6	0.43	XP_022817958.1(uncharacterized protein LOC111350563 [Spodoptera litura])
TRINITY_DN160772_c0_g1	0.00448971	-7.79916	1.01e-16	6.97e-14	yes	down	4.94	0.0170588	2.73	6.88	5.14	4.34	3.27	7.28	0.15	0.14	0	0	0	0	0	0	0	0	0	0	0	0	0	0	0	None
TRINITY_DN169952_c0_g1	0.00367268	-8.08895	1.02e-16	7.01e-14	yes	down	14.455	0.0370588	19.57	16.35	11.96	7.17	16.91	14.77	0	0	0.63	0	0	0	0	0	0	0	0	0	0	0	0	0	0	None
TRINITY_DN57524_c4_g1	0.0404845	-4.62649	1.04e-16	7.14e-14	yes	down	229.9	13.1818	237.7	288.98	183.67	229.33	219.99	219.73	9.25	9.82	12.75	27.67	21.3	15.44	2.83	4.38	14.44	13.95	15.06	13.83	18.68	17.09	3.83	9.09	14.68	XP_022837622.1(uridine phosphorylase 1-like isoform X2 [Spodoptera litura])
TRINITY_DN54944_c6_g4	0.00290527	-8.42711	1.05e-16	7.16e-14	yes	down	3.93833	0.01	3.72	5.25	3.59	3.29	6.05	1.73	0	0	0	0	0	0.04	0	0	0	0	0	0.04	0	0	0	0	0.09	None
TRINITY_DN62238_c1_g1	0.00236794	-8.72215	1.11e-16	7.57e-14	yes	down	57.45	0.204706	51.23	51.03	50.6	59.36	70.96	61.52	0.05	0.14	0.06	0.1	0.05	0.06	0.2	0.33	0.04	0.02	1.3	0.05	0.05	0	0.32	0.27	0.44	XP_022828354.1(GILT-like protein 2 [Spodoptera litura])
TRINITY_DN55538_c0_g1	0.00226353	-8.78721	1.13e-16	7.62e-14	yes	down	225.397	0.591765	272.1	301.6	157.62	192.41	246.01	182.64	0.3	0.14	0.45	0.16	0.34	0.44	1.48	1.86	0.14	0.25	0.25	0.14	0.24	0.03	1.24	1.39	1.21	XP_022832017.1(carboxypeptidase B-like [Spodoptera litura])
TRINITY_DN63934_c4_g1	0.15757	-2.66593	1.15e-16	7.73e-14	yes	down	495.213	106.928	493.21	432.24	449.14	445.66	734.57	416.46	108.55	120.76	123.36	85.89	100.04	123.79	38.25	54.83	172.84	151.59	166.35	102.33	88.08	97.4	121.64	104.23	57.84	XP_022833957.1(collagen alpha-1(IV) chain [Spodoptera litura])
TRINITY_DN37405_c1_g1	0.000851552	-10.1976	1.17e-16	7.88e-14	yes	down	399.562	0.428824	456.42	311.59	347.08	383.74	460.21	438.33	0	0.79	0	0	0	0	1.18	2.58	0.78	0	0	0.22	0	0	0.25	0.52	0.97	None
TRINITY_DN3467_c0_g1	0.00313038	-8.31945	1.23e-16	8.26e-14	yes	down	2.54167	0.00529412	2.54	3.63	2.83	2.12	2.02	2.11	0	0	0	0	0	0	0.09	0	0	0	0	0	0	0	0	0	0	None
TRINITY_DN37985_c0_g1	0.00249235	-8.64828	1.24e-16	8.32e-14	yes	down	11.3233	0.0235294	5.57	3.63	12.91	22.47	7.25	16.11	0	0	0.27	0.13	0	0	0	0	0	0	0	0	0	0	0	0	0	AJW76724.1(alkaline phosphatase 4 [Spodoptera exigua])
TRINITY_DN57124_c1_g1	0.0037224	-8.06955	1.33e-16	8.89e-14	yes	down	6.505	0.0982353	4.99	2.96	4.18	9.06	10.28	7.56	0.06	0.65	0	0.04	0.04	0.03	0	0.04	0	0	0	0.09	0.08	0.57	0.07	0	0	XP_022827225.1(cytochrome P450 4C1-like [Spodoptera litura])
TRINITY_DN162948_c0_g1	0.0228813	-5.44969	1.4e-16	9.33e-14	yes	down	19.5333	0.608824	17.32	19.66	25.79	16.5	16.38	21.55	0.65	0.2	0.37	0.66	0.63	0.5	1.36	0.27	0.23	0.48	0.41	0.88	0.82	0.41	0.62	0.83	1.03	XP_022837407.1(juvenile hormone epoxide hydrolase-like [Spodoptera litura])
TRINITY_DN53350_c0_g1	0.00116352	-9.74729	1.41e-16	9.35e-14	yes	down	210.692	0.329412	207.89	191.24	105.54	103.19	311.56	344.73	0.17	0.08	0.4	0	0.08	0	0.22	1.11	0.32	0.17	0	0	0.08	0.15	0.7	1.34	0.78	XP_022821654.1(trypsin CFT-1-like [Spodoptera litura])
TRINITY_DN46162_c1_g1	0.00258614	-8.59498	1.42e-16	9.36e-14	yes	down	683.057	2.35176	640.34	705.04	545.12	673.33	834.79	699.72	0	0	0	0	4.13	0	0	0	16.23	4.4	4.26	7.29	0	3.67	0	0	0	None
TRINITY_DN48942_c0_g1	0.00303483	-8.36417	1.43e-16	9.43e-14	yes	down	7.765	0.0435294	5.58	5.39	10.63	8.3	9.45	7.24	0	0	0	0	0.07	0.1	0.07	0.07	0	0	0	0	0.13	0	0.15	0.15	0	XP_022835738.1(cytochrome P450 4C1-like, partial [Spodoptera litura])
TRINITY_DN66370_c0_g1	0.00162312	-9.26701	1.53e-16	1e-13	yes	down	31.4567	0.0676471	32.06	34.07	30.92	27.11	31.85	32.73	0	0	0.13	0.04	0.35	0.04	0	0.07	0.21	0.09	0	0.14	0	0.08	0	0	0	XP_022825581.1(putative serine protease K12H4.7 [Spodoptera litura])
TRINITY_DN62238_c0_g1	0.0015472	-9.33612	1.56e-16	1.02e-13	yes	down	22.5883	0.101176	23.17	18.75	39.75	10.84	15.21	27.81	0.02	0	0	0.14	0.06	0	0	0.08	0.02	0	0.02	0.54	0.43	0.02	0.08	0.21	0.1	XP_022828132.1(GILT-like protein 3 [Spodoptera litura])
TRINITY_DN45390_c2_g1	0.00436885	-7.83853	1.61e-16	1.05e-13	yes	down	9.74833	0.0352941	13.2	10.74	7.02	10.34	9.39	7.8	0	0	0	0	0	0	0.19	0	0.21	0	0	0	0.2	0	0	0	0	None
TRINITY_DN5030_c0_g2	0.00101907	-9.93853	1.72e-16	1.12e-13	yes	down	28.0433	0.0329412	26.6	13.78	16.17	25.71	62.98	23.02	0	0	0	0	0	0	0.05	0.05	0	0	0	0	0	0.26	0.2	0	0	XP_022816526.1(endocuticle structural glycoprotein SgAbd-5-like [Spodoptera litura])
TRINITY_DN61578_c1_g1	0.0598573	-4.06233	1.78e-16	1.15e-13	yes	down	227.86	22.3476	230.71	172.69	377.97	290.23	173.73	121.83	19.31	10.71	9.86	32.39	29.54	45.78	13.39	21.12	14.33	17.64	35.52	25.55	40.4	21.76	12.93	16.74	12.94	XP_022826837.1(protein obstructor-E-like [Spodoptera litura])
TRINITY_DN58887_c4_g2	0.00531231	-7.55644	1.82e-16	1.17e-13	yes	down	73.78	0.172941	67.08	98.7	42.87	114.31	75.11	44.61	0.83	0	0.02	0.03	0.03	0.03	0.02	0.11	0.03	0	0	0.12	0.05	0.73	0.02	0.81	0.11	None
TRINITY_DN60291_c2_g1	0.00787885	-6.9878	1.85e-16	1.19e-13	yes	down	180.128	0.942353	179.96	197.78	127.42	157.71	196.51	221.39	0.22	0.11	0.5	0.37	0.95	0.47	3.41	2.12	0.16	0.5	0.26	0.85	0.17	0.24	1.19	2.7	1.8	PNF41196.1(hypothetical protein B7P43_G01456 [Cryptotermes secundus])
TRINITY_DN55370_c3_g3	0.00200169	-8.96457	1.86e-16	1.19e-13	yes	down	27.2133	0.0705882	27.14	25.22	19.37	22.81	35.23	33.51	0	0	0	0.04	0.04	0	0	0.2	0.05	0	0.05	0.08	0.32	0.05	0	0.14	0.23	XP_022819939.1(23 kDa integral membrane protein-like [Spodoptera litura])
TRINITY_DN34215_c0_g1	0.00122504	-9.67296	1.86e-16	1.19e-13	yes	down	35.2483	0.0311765	37.8	25.8	19.3	25.28	68.7	34.61	0	0	0.13	0	0.35	0	0	0	0.05	0	0	0	0	0	0	0	0	None
TRINITY_DN55421_c4_g2	0.00122214	-9.67638	1.88e-16	1.2e-13	yes	down	66.405	0.105882	68.57	48.2	76.66	60.79	82.12	62.09	0.02	0	0.17	0.01	0.09	0.12	0.32	0.12	0.08	0	0.04	0	0	0.05	0.27	0.28	0.23	XP_022816498.1(endocuticle structural glycoprotein SgAbd-5-like isoform X2 [Spodoptera litura])
TRINITY_DN90008_c0_g1	0.00394766	-7.98479	1.93e-16	1.23e-13	yes	down	5.46	0.0135294	7.14	4.1	6.28	6.11	4.99	4.14	0	0	0	0.23	0	0	0	0	0	0	0	0	0	0	0	0	0	XP_022829288.1(dentin sialophosphoprotein-like [Spodoptera litura])
TRINITY_DN59347_c0_g6	0.013432	-6.21818	1.99e-16	1.26e-13	yes	down	18	0.353529	18.87	12.06	4.8	23.41	32.54	16.32	0.49	0.46	0.43	0.17	0.07	0.09	0.15	0.44	0.79	0.31	0.57	0.09	0.23	0.2	0.15	1.03	0.34	XP_022818299.1(von Hippel-Lindau disease tumor suppressor [Spodoptera litura])
TRINITY_DN60849_c6_g1	0.00134578	-9.53734	2.01e-16	1.27e-13	yes	down	64.895	0.0988235	71.5	79.8	57.48	44.7	86.54	49.35	0	0	0	0	0	0	0.2	0	0	0	0	0	0	0	0	1.07	0.41	None
TRINITY_DN57777_c0_g2	0.00219387	-8.8323	2.07e-16	1.31e-13	yes	down	81.26	0.154706	62.25	201.98	68.42	90.31	27.13	37.47	0	0	0	0	0	0	0	0	0	0	0	0	0	0	0	1.44	1.19	None
TRINITY_DN63781_c2_g1	0.0416414	-4.58584	2.15e-16	1.35e-13	yes	down	58.235	4.50529	46.62	56.14	40.01	68.43	90.29	47.92	1.2	1.51	1.45	5.48	9.6	5.03	5.08	4.25	9.71	2.15	2.23	5.81	5.66	4.79	3.16	5.27	4.21	XP_022834080.1(uncharacterized protein LOC111361884 [Spodoptera litura])
TRINITY_DN57601_c0_g1	0.0024116	-8.69579	2.19e-16	1.37e-13	yes	down	188.803	0.622941	202.5	166.97	159.59	246.25	184.04	173.47	0.22	0.37	0.87	2.36	2.88	0.48	0.15	0.39	0.7	0.73	0.56	0.25	0.17	0.09	0.06	0.04	0.27	XP_022822009.1(uncharacterized transmembrane protein DDB_G0289901-like [Spodoptera litura])
TRINITY_DN61949_c5_g2	119.025	6.89512	2.22e-16	1.39e-13	yes	up	0.43	73.2147	0.26	0.35	0.33	0.29	0.55	0.8	46.67	49.07	66.4	85.75	69.05	96.76	11.3	48.15	107.54	77.95	91.58	108.12	94.49	137.09	41.67	68.02	45.04	XP_022824262.1(ankyrin repeat domain-containing protein 50-like isoform X1 [Spodoptera litura])
TRINITY_DN57174_c13_g1	0.0437097	-4.5159	2.26e-16	1.41e-13	yes	down	169.177	52.8006	128.14	294.06	124.45	107.39	133.85	227.17	39.76	53.4	12.06	58.67	21.78	64.89	21.24	27.66	88.85	71.41	106.98	82.6	84	99.01	24.85	21.58	18.87	XP_022834772.1(luciferin 4-monooxygenase-like [Spodoptera litura])
TRINITY_DN46474_c0_g1	0.00143108	-9.44867	2.35e-16	1.46e-13	yes	down	566.178	1.03235	643.7	238.84	1164.93	892.27	209	248.33	0	0	0	1.35	5.13	0	0	1.36	1.48	0	3.21	0.63	2.98	0	0.74	0	0.67	None
TRINITY_DN58887_c2_g1	0.00631169	-7.30776	2.36e-16	1.46e-13	yes	down	7.08833	0.0782353	7.33	5.39	4.7	7.52	8.55	9.04	0.05	0	0	0.3	0.1	0.09	0.2	0	0.04	0.08	0.08	0	0	0.07	0.07	0.15	0.1	None
TRINITY_DN48119_c0_g1	0.00578807	-7.4327	2.38e-16	1.47e-13	yes	down	2.64333	0.00823529	0.77	1.76	2.73	3.57	4.06	2.97	0	0	0	0	0	0	0	0	0	0.14	0	0	0	0	0	0	0	XP_022816194.1(uncharacterized protein LOC111349331 [Spodoptera litura])
TRINITY_DN167197_c0_g1	0.00501879	-7.63844	2.43e-16	1.49e-13	yes	down	3.18	0.0105882	2.59	3.9	2.02	3.4	2.49	4.68	0	0	0	0	0.09	0	0	0	0	0	0	0	0.09	0	0	0	0	None
TRINITY_DN52206_c0_g1	0.00327309	-8.25513	2.5e-16	1.53e-13	yes	down	16.2517	0.0864706	16.56	26.64	10.4	10	13.46	20.45	0.31	0.15	0.21	0	0.06	0.05	0.12	0.05	0	0.14	0.03	0	0.05	0	0.05	0.16	0.09	ADB96010.1(carboxypeptidase [Spodoptera frugiperda])
TRINITY_DN59277_c5_g7	0.00259065	-8.59247	2.63e-16	1.61e-13	yes	down	7.075	0.00882353	10.28	5	2.12	3.25	16.63	5.17	0	0.15	0	0	0	0	0	0	0	0	0	0	0	0	0	0	0	None
TRINITY_DN42283_c1_g1	0.00163664	-9.25505	2.65e-16	1.62e-13	yes	down	275.087	0.611765	273.58	395.9	246.43	265.8	205.91	262.9	0	0.04	0.17	0.32	0.2	0.47	1.43	2.03	0.3	0.46	0.09	0.36	0.08	0.17	1.6	1.09	1.59	XP_022831990.1(pancreatic triacylglycerol lipase-like [Spodoptera litura])
TRINITY_DN67708_c0_g1	0.0244775	-5.3524	2.84e-16	1.73e-13	yes	down	8.24667	0.285294	7.65	8.8	6.13	9.7	8.22	8.98	0.24	0.06	0.25	0.23	0.26	0.08	0.26	0.47	0.34	0.16	0.35	0.16	0.3	0.44	0.47	0.21	0.57	XP_022817572.1(transmembrane emp24 domain-containing protein 5-like [Spodoptera litura])
TRINITY_DN60111_c2_g4	0.0240382	-5.37853	2.99e-16	1.81e-13	yes	down	83.845	2.97176	86.03	52.77	69.58	70.78	131.96	91.95	0.56	1.71	0.77	5.13	5.33	2.59	3.81	2.48	2.13	1.59	1.41	3.53	5.6	2.3	1.91	2.55	7.12	XP_022819757.1(estrogen sulfotransferase-like [Spodoptera litura])
TRINITY_DN57808_c0_g1	0.00570706	-7.45304	3.07e-16	1.86e-13	yes	down	0.755	0.00176471	1.42	0.8	0.9	0.57	0.62	0.22	0	0	0	0	0	0	0	0	0.03	0	0	0	0	0	0	0	0	XP_021197321.1(xanthine dehydrogenase-like [Helicoverpa armigera])
TRINITY_DN61490_c0_g3	0.0526599	-4.24715	3.19e-16	1.92e-13	yes	down	170.198	12.44	152.25	182.39	159.23	166.89	165.58	194.85	4.82	4.75	6.12	15.19	13.32	11.41	16.62	13.73	8.56	8.04	8.67	13.13	13.62	14.69	14.19	27.89	16.73	XP_022825129.1(myophilin-like [Spodoptera litura])
TRINITY_DN52180_c0_g1	0.00349418	-8.16083	3.22e-16	1.93e-13	yes	down	5.6	0.0252941	5.74	5.55	4.46	5.56	6.45	5.84	0	0	0	0.04	0	0.02	0.04	0.02	0.04	0.11	0	0.02	0.02	0.04	0	0	0.08	XP_022823851.1(glucose dehydrogenase [FAD, quinone]-like [Spodoptera litura])
TRINITY_DN60982_c2_g4	0.00157524	-9.31021	3.27e-16	1.96e-13	yes	down	107.282	0.232353	85.47	259.19	125.7	27.07	21.12	125.14	0.05	0.18	0.18	0	0.04	0.08	0.58	0.38	0.04	0.14	0.09	0.08	0.04	0.09	0.55	1.09	0.34	XP_022831731.1(collagenase-like [Spodoptera litura])
TRINITY_DN54494_c1_g1	0.0137543	-6.18397	3.52e-16	2.11e-13	yes	down	332.355	7.88059	269.94	258.39	151.63	201.02	805.62	307.53	2.55	5.32	4.2	6.56	12.67	5.37	3.24	3.2	6.78	14.25	5.82	26.4	12.13	18.56	1.91	2.39	2.62	XP_022819772.1(uncharacterized protein LOC111351835 [Spodoptera litura])
TRINITY_DN59301_c0_g2	0.00101989	-9.93737	3.95e-16	2.35e-13	yes	down	180.187	0.298235	329.79	70.93	365.45	206.53	76	32.42	0.07	0.3	0.2	0.02	0.18	0.04	0.96	1.92	0.18	0.06	0.02	0.03	0.05	0.06	0.27	0.54	0.17	PCG64818.1(hypothetical protein B5V51_10068 [Heliothis virescens])
TRINITY_DN63481_c4_g2	0.0301392	-5.05221	3.96e-16	2.36e-13	yes	down	1276.65	54.6447	1273.41	984.61	487.93	2066.7	2075.02	772.23	38.4	44.26	53.71	113.42	78.79	76.83	18.79	19.15	48.01	72.37	45.86	86.3	80.03	74.1	18.31	39.77	20.86	XP_022826181.1(uncharacterized protein LOC111356151 [Spodoptera litura])
TRINITY_DN49108_c0_g1	0.00536251	-7.54288	4.03e-16	2.39e-13	yes	down	141.128	1.07176	116.39	98.2	144.45	205.11	151.99	130.63	1.38	2.18	0.63	1.78	2.24	0.37	0	0.19	1.29	1.63	1.82	1.81	1.05	1.43	0.42	0	0	XP_022822325.1(uncharacterized protein LOC111353495 [Spodoptera litura])
TRINITY_DN58331_c1_g2	0.00781717	-6.99914	4.09e-16	2.42e-13	yes	down	459.003	5.88412	395.28	554.88	270.13	527.73	480.88	525.12	2.88	2.35	2.28	3.52	3.04	1.96	11.4	9.53	3.11	2.65	1.7	1.79	3.42	4.07	9.06	30.27	7	XP_022822932.1(uncharacterized protein LOC111353941 [Spodoptera litura])
TRINITY_DN61831_c1_g1	0.00253363	-8.62458	4.49e-16	2.65e-13	yes	down	22.8233	0.0952941	27.15	28.75	18.33	21.29	21.34	20.08	0	0.43	0.11	0.1	0	0.09	0	0	0.11	0	0.78	0	0	0	0	0	0	None
TRINITY_DN55359_c0_g1	0.00232694	-8.74735	4.53e-16	2.66e-13	yes	down	10.15	0.0317647	12.84	13.37	9.22	5.86	7.22	12.39	0	0	0.06	0	0	0	0	0	0	0	0	0	0	0.06	0.06	0.36	0	XP_022816224.1(uncharacterized protein LOC111349356 [Spodoptera litura])
TRINITY_DN46755_c1_g1	0.00266371	-8.55235	4.95e-16	2.9e-13	yes	down	35.3267	0.123529	35.01	37.25	27.39	28.6	44.07	39.64	0	0.06	0.11	0.21	0.11	0.19	0.1	0.44	0	0	0.17	0	0.33	0.05	0	0	0.33	XP_022825309.1(carbonic anhydrase 1 isoform X1 [Spodoptera litura])
TRINITY_DN60841_c0_g1	0.0656867	-3.92825	5.3e-16	3.1e-13	yes	down	74.79	7.13412	88.21	90.4	44.22	60.1	101.54	64.27	3.36	3.51	4.1	8.29	8.72	7.41	4.39	7.41	6.45	5.29	5.7	8.08	7.93	9.34	5.88	16.75	8.67	XP_022822042.1(uncharacterized protein LOC111353305 isoform X2 [Spodoptera litura])
TRINITY_DN50155_c0_g1	0.0018239	-9.09876	5.34e-16	3.11e-13	yes	down	61.6517	0.140588	39.85	38.74	49.19	72.53	82.78	86.82	0	0	0	0.84	0.14	0	0	0	0	0.66	0.16	0	0.15	0	0	0.15	0.29	None
TRINITY_DN60742_c1_g3	0.00247077	-8.66082	5.49e-16	3.19e-13	yes	down	105.883	0.327647	50.38	199.44	129.34	85.65	69.73	100.76	0	0.35	0	0	0.54	0	0.94	0.93	1.39	0.38	0	0	0	0	0.34	0.7	0	XP_022823681.1(high choriolytic enzyme 2-like [Spodoptera litura])
TRINITY_DN4840_c0_g2	0.00403366	-7.9537	5.77e-16	3.35e-13	yes	down	9.73	0.0529412	9.86	11.25	8.79	9.15	12.6	6.73	0.1	0	0.03	0	0.14	0	0.11	0.03	0.09	0.07	0	0	0	0.09	0.09	0.06	0.09	XP_022830951.1(sulfotransferase family cytosolic 1B member 1-like [Spodoptera litura])
TRINITY_DN46589_c0_g1	78.9602	6.30305	5.78e-16	3.34e-13	yes	up	0.0983333	11.3694	0.12	0.08	0.16	0.09	0.08	0.06	13.74	20.7	18.17	9.96	15.06	5.42	4.53	8.3	15.44	10.56	7.77	9	11.6	6.6	14.28	8.06	14.09	XP_022837080.1(uncharacterized protein LOC111364437 isoform X1 [Spodoptera litura])
TRINITY_DN60957_c0_g2	0.136501	-2.87301	5.82e-16	3.35e-13	yes	down	927.2	177.154	812.31	916.2	1063.43	846.07	724.08	1201.11	139.12	121.92	154	238.08	226.55	224.85	168.65	109.83	162.81	157.87	175.6	253.51	208.51	258.71	136.01	136.82	138.78	XP_022819718.1(troponin C-like isoform X2 [Spodoptera litura])
TRINITY_DN61017_c11_g1	0.210413	-2.24871	5.85e-16	3.36e-13	yes	down	2443.52	721.254	2303.46	2497.93	2716.54	2235.82	2164.36	2743	582.13	506.98	586.89	817.46	821.51	766.24	1011.97	664.45	648.11	607.15	645.46	713.83	596.47	788.53	841.07	869.73	793.33	AAZ31061.1(actin 6 [Aedes aegypti])
TRINITY_DN1634_c0_g1	0.00366996	-8.09002	5.89e-16	3.38e-13	yes	down	2.28833	0.00705882	2.49	3.13	1.53	2.04	1.66	2.88	0	0	0	0	0	0	0.08	0	0	0	0	0	0.04	0	0	0	0	None
TRINITY_DN53109_c0_g1	0.00151274	-9.36862	6.47e-16	3.7e-13	yes	down	4.93667	0.00705882	2.7	19.88	1.44	3.25	0.96	1.39	0	0	0	0	0.04	0	0	0	0	0	0.04	0	0	0	0.04	0	0	XP_022814428.1(phospholipase A1-like [Spodoptera litura])
TRINITY_DN58577_c7_g2	0.00346923	-8.17117	6.57e-16	3.75e-13	yes	down	9.49667	0.0252941	6.95	9.96	9.24	18.84	6.22	5.77	0	0	0	0.14	0	0	0.29	0	0	0	0	0	0	0	0	0	0	ANI21986.1(UDP-glycosyltransferase 33B14 [Spodoptera exigua])
TRINITY_DN60742_c1_g7	0.00180014	-9.11767	6.58e-16	3.74e-13	yes	down	227.515	0.49	311.18	365.07	202.46	132.7	201.42	152.26	1.32	0.64	1.2	2.86	0	0	1.69	0	0	0	0	0	0	0	0.62	0	0	XP_022823681.1(high choriolytic enzyme 2-like [Spodoptera litura])
TRINITY_DN57048_c6_g2	0.00517607	-7.59393	6.59e-16	3.74e-13	yes	down	77.11	0.461765	57.35	78.05	49.2	37.94	95.65	144.47	1.63	0.77	0.28	0	0	0	0	0.67	1.02	0.83	0.54	0.43	0	0.72	0	0.25	0.71	XP_022826631.1(brachyurin-like [Spodoptera litura])
TRINITY_DN57818_c4_g1	0.00101527	-9.94392	6.67e-16	3.77e-13	yes	down	73.175	0.0994118	50.97	46.99	66.55	103.14	95.29	76.11	0.07	0.08	0.18	0	0.06	0.06	0.07	0.29	0.09	0	0.01	0	0	0	0.52	0.21	0.05	XP_022826756.1(fatty acyl-CoA reductase wat-like [Spodoptera litura])
TRINITY_DN19231_c0_g1	0.00688907	-7.18148	7.15e-16	4.03e-13	yes	down	1.71667	0.00823529	1.49	1.93	1.76	2.26	0.94	1.92	0	0.07	0	0	0	0	0	0	0.07	0	0	0	0	0	0	0	0	XP_022828931.1(uncharacterized protein LOC111358205 [Spodoptera litura])
TRINITY_DN40245_c0_g1	0.00338906	-8.2049	7.4e-16	4.16e-13	yes	down	115.49	0.0194118	95.95	134.66	103.28	38.09	143.23	177.73	0	0	0	0	0	0	0.33	0	0	0	0	0	0	0	0	0	0	XP_022837136.1(protein app1-like [Spodoptera litura])
TRINITY_DN58128_c0_g1	0.0212285	-5.55786	7.43e-16	4.17e-13	yes	down	5.84	0.167647	5.23	5.59	6.68	6.27	6.71	4.56	0.12	0.25	0.14	0.18	0.07	0.17	0.15	0.17	0.36	0.12	0.02	0.23	0.32	0.26	0.03	0.15	0.11	XP_022829003.1(synaptobrevin-1-like [Spodoptera litura])
TRINITY_DN56798_c0_g1	0.00712169	-7.13357	7.79e-16	4.36e-13	yes	down	1447.8	15.0788	1389.93	1098.77	2332.2	1741.21	776.12	1348.57	4.2	2.38	4.18	22.67	21.88	12.92	2.07	3.19	10.1	11.67	14.56	21.09	21.75	23.24	3.65	71.09	5.7	XP_022822784.1(calexcitin-2-like [Spodoptera litura])
TRINITY_DN52115_c0_g1	0.00207957	-8.9095	7.85e-16	4.38e-13	yes	down	5.21167	0.0135294	5.96	4.03	4.42	5.2	6.63	5.03	0	0	0.01	0.01	0.01	0	0	0.1	0.01	0	0.03	0	0	0	0.01	0.01	0.04	XP_022831314.1(facilitated trehalose transporter Tret1-like [Spodoptera litura])
TRINITY_DN49663_c0_g1	0.00493503	-7.66273	8.56e-16	4.76e-13	yes	down	1.29333	0.00529412	1.63	0.63	1.49	1.03	1.31	1.67	0	0	0.06	0.03	0	0	0	0	0	0	0	0	0	0	0	0	0	None
TRINITY_DN43470_c0_g1	0.00244873	-8.67375	8.61e-16	4.78e-13	yes	down	80.5417	0.284118	81.78	42.41	52.31	91.07	119.53	96.15	0.47	0.19	0.41	0.55	0.98	0.78	0	0	0.13	0	0.24	0.19	0.44	0.31	0	0.06	0.08	XP_022828041.1(TSC22 domain family protein 1-like [Spodoptera litura])
TRINITY_DN14555_c0_g1	0.00164927	-9.24396	8.76e-16	4.85e-13	yes	down	440.28	0.973529	446.29	530.45	305.25	442.15	362.17	555.37	2.88	0	0	2.48	2.2	0	0	0.41	0	0	0.98	2.69	3.15	0.85	0	0.91	0	CAR92521.1(putative dsRNase [Spodoptera frugiperda])
TRINITY_DN60877_c1_g1	0.00204654	-8.9326	8.78e-16	4.85e-13	yes	down	61.555	0.0505882	41.68	51.41	34.7	40.21	106.38	94.95	0.06	0.06	0.11	0	0	0	0.02	0.01	0.08	0	0.07	0.01	0.01	0	0.02	0.23	0.18	XP_022814538.1(uncharacterized protein LOC111348229 [Spodoptera litura])
TRINITY_DN51353_c0_g1	0.0407079	-4.61855	8.79e-16	4.84e-13	yes	down	33.485	1.89529	32.74	38.97	29.69	31.64	33.33	34.54	1.43	1.18	0.49	2.79	3.07	2.58	1.65	1.13	1.22	1.05	2.04	2.4	3.22	2.19	1.31	3.04	1.43	XP_022819359.1(15-hydroxyprostaglandin dehydrogenase [NAD(+)]-like [Spodoptera litura])
TRINITY_DN62446_c3_g2	0.0236518	-5.4019	9.11e-16	5e-13	yes	down	21.7867	0.941176	21.25	20.53	21.22	20.92	16.64	30.16	0.34	0.44	0.37	1.23	1.77	1.33	0.5	1.27	0.33	0.2	0.44	1.61	1.56	1.25	0.71	1.11	1.54	XP_022823201.1(uncharacterized protein LOC111354141 [Spodoptera litura])
TRINITY_DN56906_c9_g1	0.00290904	-8.42524	9.55e-16	5.23e-13	yes	down	10.3933	0.0423529	9.73	9.87	8.27	11.41	9.47	13.61	0.02	0.02	0.05	0	0.02	0	0	0.01	0	0	0.02	0.09	0.02	0.11	0.15	0.13	0.08	None
TRINITY_DN53862_c0_g1	0.0362683	-4.78515	1.07e-15	5.87e-13	yes	down	8.905	0.445882	7.41	7.4	8.04	8.96	10.33	11.29	0.19	0.46	0.3	0.52	0.3	0.16	0.63	0.69	0.36	0.19	0.25	0.74	0.7	0.6	0.51	0.41	0.57	XP_022829264.1(uncharacterized protein LOC111358377 isoform X2 [Spodoptera litura])
TRINITY_DN37779_c0_g1	0.00176082	-9.14954	1.12e-15	6.12e-13	yes	down	32.145	0.0764706	29.06	26.03	25.24	25.87	49.49	37.18	0	0.04	0.09	0	0.04	0	0.24	0	0.04	0	0	0	0	0.1	0.12	0.46	0.17	AFH57139.1(REPAT19 [Spodoptera exigua])
TRINITY_DN58509_c12_g2	0.00654786	-7.25476	1.12e-15	6.11e-13	yes	down	13.5433	0.0805882	11.8	28.48	11.61	14.98	5.69	8.7	0	0	0	0	0	0	0	0	0	0	0	0	0	0	1.37	0	0	None
TRINITY_DN56239_c0_g1	0.100013	-3.32175	1.29e-15	6.99e-13	yes	down	50.7383	7.17235	44.54	41.54	25.48	45.24	76.96	70.67	7.58	7.27	6.7	10.36	10.06	6.93	4.35	5.11	7.95	7.08	7.16	6.92	6.74	7.1	6.54	8.44	5.64	XP_022834864.1(repressed by EFG1 protein 1-like isoform X1 [Spodoptera litura])
TRINITY_DN24618_c0_g2	0.00424191	-7.88107	1.35e-15	7.28e-13	yes	down	7.275	0.0323529	6.14	7.71	7.2	5.86	9.26	7.48	0	0	0	0	0	0	0	0	0	0	0	0	0.09	0.18	0	0.19	0.09	XP_022818016.1(bilin-binding protein-like [Spodoptera litura])
TRINITY_DN57861_c1_g1	0.00737236	-7.08366	1.36e-15	7.31e-13	yes	down	2.74	0.00941177	4.56	3.29	1.23	1.73	2.79	2.84	0	0	0	0	0	0	0	0	0	0	0	0	0.16	0	0	0	0	None
TRINITY_DN56202_c2_g2	0.0648072	-3.9477	1.38e-15	7.45e-13	yes	down	84.475	8.30588	82.19	96.94	58.36	78.03	94.52	96.81	5.36	3.92	4.99	8.81	11.18	7.94	11.63	5.17	5.15	8.63	10.95	9.56	14.08	19.26	5.4	2.75	6.42	XP_022813838.1(uncharacterized protein LOC111347756 [Spodoptera litura])
TRINITY_DN59623_c0_g1	0.0828186	-3.5939	1.41e-15	7.54e-13	yes	down	161.893	19.0465	186.08	198.96	104.74	154.47	188.84	138.27	9.13	11.52	10.2	25.32	24.91	20.17	11.13	13.03	17.42	13.46	15.35	20.22	25.55	25.41	16.57	43.26	21.14	XP_022819033.1(transferrin-like [Spodoptera litura])
TRINITY_DN60716_c3_g1	0.00129174	-9.59647	1.46e-15	7.83e-13	yes	down	131.492	0.232353	176.94	125.55	102.57	91.01	147.95	144.93	0.25	0.42	0.71	0.37	0.63	0.8	0	0	0.08	0.29	0	0.18	0	0.14	0.04	0	0.04	XP_022827098.1(transmembrane protease serine 9-like [Spodoptera litura])
TRINITY_DN56148_c5_g1	0.0137577	-6.18362	1.47e-15	7.83e-13	yes	down	22.3083	0.437647	15.91	17.55	25.1	25.96	25.95	23.38	0.49	0.38	0.49	0.7	0.94	0.76	0.09	0.14	0.82	0.19	0.38	0.8	0.52	0.5	0.13	0.03	0.08	XP_022827527.1(cytochrome P450 4C1-like isoform X1 [Spodoptera litura])
TRINITY_DN63750_c2_g2	0.077284	-3.69369	1.5e-15	7.98e-13	yes	down	72.23	9.77529	90.8	80.81	41.91	64.18	94.59	61.09	6.85	4.64	4.73	15.3	13.06	12.86	7.06	7.38	8.1	6	7.33	12.01	12.45	13.03	7.62	18.46	9.3	XP_022823429.1(protein mesh isoform X1 [Spodoptera litura])
TRINITY_DN59351_c0_g2	0.00287432	-8.44256	1.52e-15	8.07e-13	yes	down	2.02	0.00588235	2.3	2.19	1.51	2.07	1.67	2.38	0	0	0	0	0.04	0.04	0.01	0	0	0	0	0	0	0	0	0	0.01	PCG62852.1(hypothetical protein B5V51_13501, partial [Heliothis virescens])
TRINITY_DN926_c0_g1	0.00476761	-7.71252	1.54e-15	8.14e-13	yes	down	14.6417	0.0441176	23.15	15.47	9.97	7.76	16.35	15.15	0	0	0	0	0	0	0.75	0	0	0	0	0	0	0	0	0	0	None
TRINITY_DN51974_c0_g2	0.00239971	-8.70292	1.58e-15	8.37e-13	yes	down	2356.09	7.52882	3375.46	3456.62	936.4	2241.74	2622.03	1504.26	0	0	7.44	0	7.91	0	15.23	22.81	0	0	0	0	0	0	33.79	33.81	7	AII16091.1(trypsin-like serine protease, partial [Spodoptera litura])
TRINITY_DN47030_c0_g1	0.00353928	-8.14233	1.6e-15	8.42e-13	yes	down	60.7683	0.0129412	61.59	73.44	72.09	88.73	20.2	48.56	0.08	0	0	0	0	0	0	0	0	0	0	0	0	0	0	0.07	0.07	XP_022824818.1(uncharacterized protein LOC111355269 [Spodoptera litura])
TRINITY_DN149620_c0_g1	0.00396623	-7.97801	1.7e-15	8.91e-13	yes	down	29.7717	0.13	34.01	35.23	14.47	21.54	32.11	41.27	0	0.75	0	0	0	0	0.33	0	0	0	0.39	0	0	0	0	0.74	0	XP_022824854.1(alcohol dehydrogenase-like [Spodoptera litura])
TRINITY_DN51713_c0_g1	0.00591245	-7.40203	1.73e-15	9.09e-13	yes	down	0.84	0.00235294	1.51	0.84	1.4	0.13	0.74	0.42	0	0	0	0	0	0	0	0	0	0	0	0	0	0	0	0	0.04	PCG78357.1(hypothetical protein B5V51_4405 [Heliothis virescens])
TRINITY_DN57571_c1_g1	0.0255313	-5.29159	1.8e-15	9.43e-13	yes	down	265.42	10.4041	328.39	436.55	129.6	198.56	196.83	302.59	2.63	3.75	4.02	9.42	11.91	10.5	20.24	9.02	6.15	6.14	3.4	17.8	18.87	15.02	13.69	9.5	14.81	5CG0_A(Chain A, Crystal Structure Of Spodoptera Frugiperda Beta-glycosidase)
TRINITY_DN10434_c0_g1	0.00889108	-6.81343	1.81e-15	9.47e-13	yes	down	0.71	0.00294118	0.69	0.78	0.55	0.58	0.77	0.89	0	0	0	0	0	0	0	0	0	0	0	0	0	0	0	0.05	0	None
TRINITY_DN54987_c1_g1	0.00602151	-7.37566	1.94e-15	1.01e-12	yes	down	95.465	0.803529	71.29	82.07	116.29	138.58	66.24	98.32	0.41	0.15	0.37	0.15	0.17	0.19	1.8	1.93	0.32	0.73	0.29	0.17	0.47	0.4	2.21	2.02	1.88	XP_022829978.1(cytochrome P450 6B2-like [Spodoptera litura])
TRINITY_DN58705_c0_g2	0.0363213	-4.78304	2.02e-15	1.05e-12	yes	down	50.8583	2.71706	50.32	44.41	33.59	70.15	58.34	48.34	2.26	1.72	2.35	1.58	2.86	2.91	3.66	3.93	1.18	1.49	2.19	1.34	1.65	1.39	3.52	6.03	6.13	XP_022827477.1(innexin inx7-like [Spodoptera litura])
TRINITY_DN52197_c0_g1	0.0115963	-6.43019	2.32e-15	1.2e-12	yes	down	49.31	0.810588	47.8	44.33	18.13	89.5	79.64	16.46	1.06	0.64	0.97	1.7	1.33	1.74	0.11	0.05	0.91	0.37	0.76	1.06	0.88	0.88	0.76	0.5	0.06	XP_022831680.1(trypsin 5G1-like [Spodoptera litura])
TRINITY_DN59209_c1_g3	0.002122	-8.88036	2.36e-15	1.22e-12	yes	down	177.95	0.409412	237.07	286.92	147.46	157.5	148.35	90.4	0.62	0	0.75	0	0	0.51	3.19	0	0	1.29	0	0	0	0	0	0.6	0	XP_022824800.1(pancreatic triacylglycerol lipase-like [Spodoptera litura])
TRINITY_DN47849_c0_g2	0.000197056	-12.3091	2.4e-15	1.24e-12	yes	down	116.413	0	135.63	75.4	95.67	124.51	163.12	104.15	0	0	0	0	0	0	0	0	0	0	0	0	0	0	0	0	0	XP_009062560.1(hypothetical protein LOTGIDRAFT_194748, partial [Lottia gigantea])
TRINITY_DN59571_c2_g1	0.116593	-3.10044	2.61e-15	1.34e-12	yes	down	205.065	33.7765	164.05	168.47	229.83	251.18	188.08	228.78	31.78	29.76	28.44	47.5	49.04	42.87	28.68	26.62	33.92	26.88	31.29	45.7	47.29	43.42	17.14	16.91	26.96	XP_022830653.1(prostaglandin reductase 1-like [Spodoptera litura])
TRINITY_DN54632_c0_g1	0.124659	-3.00394	2.73e-15	1.4e-12	yes	down	13.395	2.39471	9.5	10.67	16.24	18.2	11.34	14.42	3.3	2.67	3.6	1.93	1.96	2.18	1.67	1.53	3.43	3.23	3.37	1.9	2.08	2.37	1.95	1.72	1.82	XP_022830711.1(uncharacterized protein LOC111359403 [Spodoptera litura])
TRINITY_DN63827_c9_g1	0.00779899	-7.0025	2.84e-15	1.45e-12	yes	down	1.74	0.00941177	2.15	2.21	1.53	1.09	1.26	2.2	0	0	0	0	0.08	0	0	0	0	0	0	0	0	0.08	0	0	0	None
TRINITY_DN57548_c5_g1	0.00919259	-6.76531	2.91e-15	1.49e-12	yes	down	40.7683	1.53529	48.72	46.25	34.08	9.93	22.85	82.78	1.17	2.64	0.91	1	1.82	0.14	2.68	2.35	1.42	0.55	1.29	1.23	2.21	1.94	1	2.14	1.61	XP_022836358.1(trypsin, alkaline B-like [Spodoptera litura])
TRINITY_DN63555_c1_g1	0.00442079	-7.82148	2.92e-15	1.49e-12	yes	down	81.6617	1.03059	111.68	109.42	63.49	66.9	56.59	81.89	0.47	2.19	1.11	1.03	2.82	1.53	0.02	0.06	1.6	1.33	2.51	0.99	0.99	0.76	0.08	0.03	0	XP_022827873.1(organic cation transporter protein-like [Spodoptera litura])
TRINITY_DN90597_c0_g1	0.00496906	-7.65281	3.2e-15	1.63e-12	yes	down	4.55167	0.0170588	2.56	1.28	8.74	5.81	4.47	4.45	0	0	0	0.2	0	0	0	0	0	0	0	0.09	0	0	0	0	0	None
TRINITY_DN56506_c0_g1	0.125653	-2.99248	3.28e-15	1.66e-12	yes	down	87.9067	16.3094	82.96	97.27	79.78	80.76	95.81	90.86	23.8	24.97	23.36	14.35	14.14	11.43	12.21	9.84	19.21	18.38	20.74	16.68	13.76	17.01	9.29	18.11	9.98	XP_022837477.1(uncharacterized protein LOC111364709 isoform X6 [Spodoptera litura])
TRINITY_DN59876_c0_g1	43.3575	5.43821	3.42e-15	1.73e-12	yes	up	0.258333	15.8859	0.23	0.36	0.14	0.33	0.22	0.27	10.19	10.31	9.87	16.18	15.97	16.21	21.73	15.07	11.57	11.01	11.94	16.03	15.04	18.7	20.77	26.57	22.9	XP_021194579.1(mushroom body large-type Kenyon cell-specific protein 1 [Helicoverpa armigera])
TRINITY_DN55568_c1_g2	0.0472514	-4.4035	3.47e-15	1.75e-12	yes	down	9.75	0.663529	8.92	8.83	7.96	13.05	12.94	6.8	0.52	0.22	0.65	0.34	0.89	0.8	0.54	0.54	1.06	0.83	1.17	0.9	0.51	0.36	0.4	1	0.55	XP_022817637.1(A disintegrin and metalloproteinase with thrombospondin motifs adt-2-like [Spodoptera litura])
TRINITY_DN44967_c0_g1	0.0224029	-5.48017	3.55e-15	1.78e-12	yes	down	48.17	1.52765	48.76	89.93	24	34.48	34.28	57.57	0.79	0.32	0.8	2.71	2.57	2.12	1.22	0.84	1.71	0.8	0.93	2.87	2.94	3.18	0.48	0.68	1.01	XP_022827446.1(myrosinase 1-like [Spodoptera litura])
TRINITY_DN61050_c0_g1	32.6346	5.02833	3.55e-15	1.78e-12	yes	up	3.50167	143.33	2.67	3.57	2.89	2.77	5.23	3.88	82.46	75.2	96.65	201.71	177.27	181.21	41.42	134.95	180.82	147.14	182.43	236.93	163.15	253.72	93.04	111.21	77.3	XP_022825761.1(leucine-rich repeat-containing protein 40 isoform X1 [Spodoptera litura])
TRINITY_DN56544_c3_g2	0.00250297	-8.64214	3.62e-15	1.81e-12	yes	down	160.375	1.55235	116.49	242.46	145.16	106.28	165.38	186.48	0.05	3.61	0.04	0.12	0	0.04	5.42	1.58	5.49	0.14	3.65	0.81	3.66	0.08	0.6	0.44	0.66	None
TRINITY_DN39968_c0_g1	0.00125314	-9.64024	3.67e-15	1.83e-12	yes	down	1310.5	2.00294	3182.14	2451.71	747.48	909.3	94.1	478.28	0	0	0	0	0	0	2.67	19.6	0	3.15	0	0	0	0	6.08	0	2.55	None
TRINITY_DN173783_c0_g1	0.00275783	-8.50225	3.78e-15	1.88e-12	yes	down	28.3067	0.0835294	26.55	27.71	28.16	20.69	30.34	36.39	0	0	0.65	0	0	0	0	0.77	0	0	0	0	0	0	0	0	0	XP_022818053.1(acetylcholinesterase-like [Spodoptera litura])
TRINITY_DN53489_c0_g1	0.00544294	-7.5214	3.85e-15	1.91e-12	yes	down	1.07667	0.0629412	1.4	0.58	1.13	1.14	1.19	1.02	0	0	0	0	0	0.61	0	0.21	0	0	0.25	0	0	0	0	0	0	None
TRINITY_DN7396_c0_g1	0.00125733	-9.63542	4.01e-15	1.99e-12	yes	down	58.515	0.100588	64.1	41.98	55.07	60.3	59.47	70.17	0.03	0	0.05	0.13	0.02	0.1	0.04	0.44	0.12	0	0	0	0.07	0.02	0.02	0	0.67	XP_022817989.1(uncharacterized protein LOC111350592 [Spodoptera litura])
TRINITY_DN63318_c2_g2	0.00360736	-8.11484	4.05e-15	2e-12	yes	down	16.865	0.519412	13.96	10.67	10.61	19.34	25.19	21.42	0	7.97	0.15	0.18	0	0.11	0.04	0	0	0.09	0.13	0.05	0	0.03	0.08	0	0	None
TRINITY_DN61076_c0_g1	0.022671	-5.46301	4.28e-15	2.11e-12	yes	down	81.7783	7.07882	91.12	55.54	52.91	72.47	135.9	82.73	7.33	2.34	5	16.41	6.58	10.79	0.94	0.61	5.26	3.93	15.9	12.78	17.07	12.77	1.17	1.09	0.37	XP_022830469.1(pupal cuticle protein 36a-like [Spodoptera litura])
TRINITY_DN57928_c0_g1	0.00674535	-7.21189	4.33e-15	2.13e-12	yes	down	2.77	0.0258824	1.82	3.05	2.45	3.31	2.77	3.22	0.09	0.03	0.05	0	0.05	0.07	0	0	0.03	0.06	0.03	0	0	0.03	0	0	0	XP_022816194.1(uncharacterized protein LOC111349331 [Spodoptera litura])
TRINITY_DN14769_c0_g1	0.00858669	-6.86368	4.33e-15	2.13e-12	yes	down	0.78	0.00294118	0.83	0.19	0.74	0.82	1.04	1.06	0	0	0	0	0.05	0	0	0	0	0	0	0	0	0	0	0	0	XP_022824830.1(mucin-2-like [Spodoptera litura])
TRINITY_DN5085_c0_g1	0.11449	-3.1267	4.66e-15	2.28e-12	yes	down	85.315	14.0635	91.11	91.47	86.89	81.55	86.3	74.57	13.16	13.12	14.24	19.19	18.83	15.52	12.07	8.55	20.51	15.93	18.06	16.28	10.91	16.22	9.69	8.16	8.64	XP_022816582.1(collagen alpha-2(IV) chain-like isoform X16 [Spodoptera litura])
TRINITY_DN57218_c1_g1	0.00135032	-9.53248	4.74e-15	2.32e-12	yes	down	3694.01	6.75471	3872.37	5733.91	2745.38	2831.99	3471.6	3508.79	0.44	1.22	3.94	1.54	1.02	1.47	23.85	32.16	0.63	1.38	0.81	1.75	1.49	1.43	17.48	10.03	14.19	XP_022817201.1(calphotin-like [Spodoptera litura])
TRINITY_DN52916_c0_g1	0.0478689	-4.38477	5.01e-15	2.44e-12	yes	down	32.02	2.17294	43.98	47.19	16.12	22.63	37.4	24.8	2.48	1.98	2.29	2.41	1.57	1.22	5.04	2.38	2.29	1.44	1.78	1.66	0.92	1.77	2.74	2.63	2.34	XP_022828133.1(organic cation transporter protein-like [Spodoptera litura])
TRINITY_DN55024_c1_g6	0.00754696	-7.04989	5.36e-15	2.61e-12	yes	down	3.34	0.0105882	1.54	1.81	3.31	1.6	8.01	3.77	0	0	0	0	0	0	0.18	0	0	0	0	0	0	0	0	0	0	None
TRINITY_DN55082_c8_g1	0.00203497	-8.94078	5.38e-15	2.61e-12	yes	down	1522.28	3.88647	1489.72	1378.54	1777.01	1431.03	1533.8	1523.55	0.71	0.53	0.66	1.24	1.26	1.28	13.11	4.53	0.51	0.36	0.53	2.34	1.79	2.24	7.06	12.86	15.06	XP_022825911.1(uncharacterized protein LOC111355974 [Spodoptera litura])
TRINITY_DN19043_c0_g1	0.00359266	-8.12073	5.46e-15	2.64e-12	yes	down	4.10833	0.0141176	6.31	1.06	3.95	0.8	5.93	6.6	0	0	0	0	0	0	0	0	0.12	0	0	0	0	0	0	0	0.12	None
TRINITY_DN59388_c0_g1	0.00418914	-7.89913	6.32e-15	3.05e-12	yes	down	6.585	0.0288235	7.39	10.74	2.92	4.52	7.91	6.03	0	0	0	0	0	0.07	0.14	0	0	0	0	0.13	0	0	0	0	0.15	None
TRINITY_DN53910_c0_g1	0.00366688	-8.09123	6.42e-15	3.1e-12	yes	down	4.635	0.0176471	4.41	5	2.52	3.45	8.84	3.59	0	0	0.05	0.15	0.1	0	0	0	0	0	0	0	0	0	0	0	0	XP_022828071.1(uncharacterized protein LOC111357558 [Spodoptera litura])
TRINITY_DN57136_c1_g1	0.119868	-3.06048	6.91e-15	3.32e-12	yes	down	252.857	44.0847	272.39	289.63	213.28	216.04	306.22	219.58	57.75	64.95	54.88	33.69	40.99	29.05	47.16	34.47	59.13	64.17	66.08	39.49	41.08	40.67	27.35	25.82	22.71	XP_022824041.1(uncharacterized protein LOC111354738 [Spodoptera litura])
TRINITY_DN50210_c0_g1	0.0772124	-3.69502	7.07e-15	3.39e-12	yes	down	25.6183	2.67412	19.32	20.05	28.3	21.29	37.56	27.19	1.88	2.49	4.17	3.06	2.99	3.05	1.89	2.26	3.6	2.65	2.13	2.77	3.33	2.6	1.96	2.25	2.38	XP_022831410.1(fatty acid-binding protein, heart-like [Spodoptera litura])
TRINITY_DN55857_c0_g1	0.00548476	-7.51036	7.12e-15	3.41e-12	yes	down	7.81667	0.0617647	6.45	8.2	4.33	7.85	14.52	5.55	0.03	0.02	0	0.09	0.11	0	0.04	0.12	0.07	0	0.02	0.02	0.17	0	0.07	0.14	0.15	XP_022826877.1(uncharacterized protein LOC111356658 [Spodoptera litura])
TRINITY_DN63066_c2_g1	0.135595	-2.88263	7.16e-15	3.42e-12	yes	down	45.3533	8.68235	53.16	50.73	28.09	42.04	63.01	35.09	13.06	12.76	11.92	7	9.78	10.2	3.22	4.52	9.94	10.75	10.89	8.73	7.74	9.43	5.66	5.6	6.4	XP_022819794.1(cGMP-dependent protein kinase, isozyme 1-like [Spodoptera litura])
TRINITY_DN51474_c0_g2	0.0300495	-5.05651	7.2e-15	3.43e-12	yes	down	15.0183	0.624118	12.52	11.91	19.65	13.64	17.71	14.68	0.09	0.59	0.58	0.77	0.85	0.56	0.38	0.43	0.58	0.63	0.95	1.47	1.12	0.56	0.16	0.65	0.24	XP_022826807.1(uncharacterized protein LOC111356618 [Spodoptera litura])
TRINITY_DN64057_c11_g2	0.00880426	-6.82758	8.37e-15	3.98e-12	yes	down	1.30333	0.128235	1.73	0.78	1.25	0.7	0.53	2.83	0	0	0	0	0	0	0	2.13	0	0	0	0	0	0	0	0.05	0	None
TRINITY_DN54247_c2_g1	0.00823837	-6.92343	8.49e-15	4.03e-12	yes	down	17.7483	0.2	13.51	11.06	19.77	12.32	17.08	32.75	0.22	0.13	0.16	0.18	0.49	0.17	0.09	0.06	0.26	0	0	0.47	0.35	0.38	0.03	0.38	0.03	XP_022814832.1(uncharacterized protein LOC111348451 [Spodoptera litura])
TRINITY_DN58244_c0_g1	0.029221	-5.09685	8.57e-15	4.06e-12	yes	down	7.87833	0.332941	9.53	8.39	6.94	5.17	8.98	8.26	0.17	0.43	0.35	0.44	0.65	0.61	0.19	0.08	0.62	0.29	0.45	0.28	0.27	0.37	0.06	0.04	0.36	XP_022817421.1(venom carboxylesterase-6-like [Spodoptera litura])
TRINITY_DN53227_c0_g1	0.00802774	-6.96079	8.65e-15	4.08e-12	yes	down	0.948333	0.00470588	0.68	0.21	0.9	1.35	1.87	0.68	0	0	0	0	0	0	0	0	0	0	0	0.04	0	0	0	0	0.04	None
TRINITY_DN61382_c6_g3	0.00234037	-8.73905	9.11e-15	4.29e-12	yes	down	41.0533	0.112353	32.35	79.46	81.78	14.72	17.77	20.24	0	0	0.37	0.35	0	0	0	0.83	0	0	0	0	0	0	0	0	0.36	XP_022820790.1(myrosinase 1-like [Spodoptera litura])
TRINITY_DN46403_c0_g1	0.0341661	-4.87129	9.32e-15	4.38e-12	yes	down	13.5917	0.654118	12.22	11.41	13.53	16.1	17.33	10.96	0.45	0.36	0.51	0.56	0.79	0.88	0.29	0.59	0.75	0.98	0.26	1.14	1.03	1.55	0.09	0.55	0.34	ANI22004.1(UDP-glycosyltransferase 40F5 [Spodoptera exigua])
TRINITY_DN59123_c9_g1	0.00967724	-6.69119	9.81e-15	4.6e-12	yes	down	4.44667	0.0311765	2.71	4.15	3.58	3.22	6.59	6.43	0	0.27	0	0	0	0	0	0	0.26	0	0	0	0	0	0	0	0	None
TRINITY_DN58745_c1_g1	0.042186	-4.56709	9.92e-15	4.64e-12	yes	down	21.8683	1.28588	21.89	19.55	22.06	18.7	26.02	22.99	0.87	0.34	0.68	1.34	1.84	1.3	0.78	1.56	1.09	0.69	0.51	1.26	1.61	1.2	0.8	4.46	1.53	XP_022821344.1(uncharacterized protein LOC111352888 [Spodoptera litura])
TRINITY_DN45614_c0_g1	0.0047427	-7.72007	9.96e-15	4.65e-12	yes	down	7.30333	0.0394118	3.77	4.82	8.87	17.12	4.13	5.11	0.12	0	0.05	0	0	0	0	0.5	0	0	0	0	0	0	0	0	0	None
TRINITY_DN58887_c3_g1	0.00678639	-7.20314	1.05e-14	4.88e-12	yes	down	22.1467	0.203529	33.6	2.69	30.91	21.97	15.83	27.88	0	0	0	0	0	0	0	1.09	0	0	0	0	2.37	0	0	0	0	None
TRINITY_DN59209_c1_g1	0.00568059	-7.45974	1.08e-14	5.01e-12	yes	down	2.785	0.0188235	1.55	3.53	3.96	2.01	1.34	4.32	0.14	0.13	0	0	0	0	0	0	0	0	0.05	0	0	0	0	0	0	XP_022824519.1(pancreatic lipase-related protein 2-like [Spodoptera litura])
TRINITY_DN50242_c0_g1	0.00726459	-7.1049	1.13e-14	5.26e-12	yes	down	70.7317	0.737647	49.85	109.2	43.9	78.83	72.38	70.23	0.21	0.43	0.93	0.22	0.39	0.13	0.64	0.39	0.38	0.7	0.39	0.36	0.26	0.07	0.4	5.51	1.13	XP_022828101.1(histidine-rich glycoprotein-like [Spodoptera litura])
TRINITY_DN60513_c0_g2	0.0022901	-8.77037	1.18e-14	5.47e-12	yes	down	5.50833	0.0164706	7.02	3.56	0.66	7.81	6.83	7.17	0	0.02	0.03	0.1	0.07	0	0	0	0.01	0	0.02	0.03	0	0	0	0	0	XP_022824677.1(uncharacterized protein LOC111355150 [Spodoptera litura])
TRINITY_DN56593_c0_g1	0.000941228	-10.0532	1.19e-14	5.49e-12	yes	down	206.093	0.248824	148.28	237.09	200.37	192.58	117.01	341.23	0	0.15	0	0.05	0.14	0.26	0.75	0.72	0	0.05	0	0	0	0	0.58	0.84	0.69	PCG75018.1(hypothetical protein B5V51_12400 [Heliothis virescens])
TRINITY_DN61993_c1_g2	0.00558011	-7.48549	1.19e-14	5.49e-12	yes	down	3.23667	0.0288235	2.68	2.8	2.7	2.33	5.88	3.03	0	0.06	0	0	0	0	0	0	0	0	0	0.27	0	0	0.16	0	0	XP_022816375.1(cytochrome P450 4C1-like [Spodoptera litura])
TRINITY_DN53389_c0_g1	0.00529987	-7.55983	1.26e-14	5.82e-12	yes	down	3.285	0.0164706	3.16	3.52	2.25	2.97	2.61	5.2	0	0	0	0	0.05	0	0	0.14	0	0	0	0.09	0	0	0	0	0	PCG62852.1(hypothetical protein B5V51_13501, partial [Heliothis virescens])
TRINITY_DN55701_c0_g1	0.0311957	-5.00251	1.33e-14	6.08e-12	yes	down	276.887	11.85	263.12	198.4	315.81	375.94	254.58	253.47	3.84	4.32	5.71	8.73	8.37	7.29	17.65	23.12	4.98	4.02	5.12	9.63	7.56	6.79	24.61	26.16	33.55	XP_022817843.1(insecticyanin-B-like [Spodoptera litura])
TRINITY_DN63703_c5_g1	0.0640798	-3.96399	1.33e-14	6.1e-12	yes	down	17.16	1.88353	22.83	17.25	22.36	20.87	9.29	10.36	3.41	5.9	3.15	1.06	1.28	1	1.61	1.66	1.68	0.79	0.91	0.58	0.71	1.47	3.32	1.89	1.6	XP_022837490.1(uncharacterized protein LOC111364713 [Spodoptera litura])
TRINITY_DN60162_c9_g1	0.00969381	-6.68872	1.44e-14	6.57e-12	yes	down	6.70833	0.0288235	5.53	7.31	1.8	8.47	11.25	5.89	0	0	0	0	0	0	0	0	0	0	0	0	0	0.49	0	0	0	None
TRINITY_DN56661_c0_g1	0.00522736	-7.5797	1.45e-14	6.62e-12	yes	down	36.5633	0.260588	37.2	35.73	58.71	38.72	11.79	37.23	0	0.1	0.06	0.54	0.6	0.51	0.06	0.03	0.03	0.07	0.03	0.6	0.73	0.42	0.15	0.15	0.35	XP_022831609.1(peptidoglycan-recognition protein LB-like [Spodoptera litura])
TRINITY_DN59079_c1_g4	0.00492933	-7.66439	1.46e-14	6.62e-12	yes	down	4.22333	0.0188235	4.18	2.52	1.98	4	8.73	3.93	0	0	0	0	0	0	0	0.15	0	0	0	0.17	0	0	0	0	0	XP_022819084.1(galectin-4-like [Spodoptera litura])
TRINITY_DN7490_c0_g1	0.0081585	-6.93748	1.46e-14	6.62e-12	yes	down	1.82667	0.00705882	2.25	2.68	0.71	0.3	1.92	3.1	0	0	0.12	0	0	0	0	0	0	0	0	0	0	0	0	0	0	None
TRINITY_DN57493_c0_g1	0.00946063	-6.72385	1.62e-14	7.34e-12	yes	down	9.19667	0.111765	8.57	10.94	7.96	14.07	4.45	9.19	0.15	0.07	0.03	0.05	0.02	0.12	0.42	0.17	0.09	0.03	0.09	0.02	0.07	0	0.15	0.2	0.22	XP_022828072.1(organic cation transporter protein-like [Spodoptera litura])
TRINITY_DN56930_c0_g1	0.0868938	-3.5246	1.63e-14	7.38e-12	yes	down	13.7983	2.78765	12.91	12.73	10.71	13.14	17.02	16.28	7.46	3.5	2.9	1.57	1.29	1.71	2.38	1.29	2.04	2.6	2.31	0.62	0.74	4.98	7.58	2.13	2.29	XP_022837571.1(kynurenine/alpha-aminoadipate aminotransferase, mitochondrial [Spodoptera litura])
TRINITY_DN60737_c2_g1	0.0281506	-5.15069	1.67e-14	7.53e-12	yes	down	218.018	8.40176	294	343.4	90.03	166.23	163.09	251.36	1.08	2.19	4.36	7.22	8.27	6.93	18.73	10.26	3.06	3.87	3.5	11.48	14.96	9.95	11.59	12.46	12.92	XP_022827201.1(lactase-phlorizin hydrolase-like [Spodoptera litura])
TRINITY_DN62195_c0_g2	0.0208221	-5.58574	1.71e-14	7.69e-12	yes	down	17.03	0.515882	16.01	10.32	23.09	16.46	18	18.3	0.97	0.41	0.1	0.55	0.46	0.59	0.91	0.09	0.4	0.22	0.52	0.5	1.15	0.48	0.29	0.94	0.19	None
TRINITY_DN63801_c0_g1	0.125221	-2.99745	1.72e-14	7.71e-12	yes	down	2382.27	489.465	1874.53	2063.07	2821.6	2349.02	2009.64	3175.76	383.88	313.77	442	814.39	788.39	762.51	300.52	197.96	520.4	424.55	453.7	788.46	647.88	786.47	223.25	249.22	223.56	XP_022829031.1(troponin I isoform X14 [Spodoptera litura])
TRINITY_DN53150_c1_g1	0.00119186	-9.71257	1.8e-14	8.05e-12	yes	down	545.278	0.805882	526.63	432.27	688.08	439.97	631.74	552.98	0	0	0	0.17	0	0.25	2.38	2.73	0	0.32	0.31	0	0	0	0.57	5.61	1.36	None
TRINITY_DN60773_c1_g2	0.104052	-3.26462	1.81e-14	8.08e-12	yes	down	15.4567	2.32059	17.27	13	22.44	12.96	12.95	14.12	2.09	1.7	2.35	2.37	3.18	2.21	1.35	1.58	3.02	2.63	2.54	2.8	2.96	2.86	1.23	1.64	2.94	XP_022815828.1(solute carrier family 22 member 13-like [Spodoptera litura])
TRINITY_DN60064_c1_g1	536.714	9.06801	1.81e-14	8.08e-12	yes	up	0.441667	275.692	0.25	0.55	0.45	0.62	0.38	0.4	204.87	200.69	173.63	569.56	659.3	409.18	50.72	37.31	244.33	179.28	212.24	468.25	504.44	472.38	50.39	130.8	119.39	XP_022835470.1(uncharacterized protein LOC111362929 [Spodoptera litura])
TRINITY_DN57178_c2_g2	0.119546	-3.06436	1.85e-14	8.22e-12	yes	down	57.145	12.4406	59.76	37.76	63.2	58.86	62.8	60.49	18.93	11.92	16.64	9.47	9.17	11.96	4.34	8.74	13.49	15.68	10.7	12.61	13.53	11.01	17.26	11.32	14.72	XP_022817293.1(uncharacterized protein LOC111350093 [Spodoptera litura])
TRINITY_DN42997_c0_g1	0.00713863	-7.13014	1.86e-14	8.25e-12	yes	down	1.22167	0.00294118	0.25	0.45	0.4	4.28	0.62	1.33	0	0	0	0	0	0	0	0	0	0	0.05	0	0	0	0	0	0	YP_184865.1(hypothetical protein CcBV_25.3 [Cotesia congregata bracovirus])
TRINITY_DN57139_c0_g1	0.00771649	-7.01784	1.87e-14	8.29e-12	yes	down	9.17667	0.110588	8.14	9.34	9.24	11.64	8.09	8.61	0.26	0.01	0.44	0.1	0.06	0.23	0.08	0.3	0	0	0	0.04	0.04	0.02	0.06	0.11	0.13	XP_022820140.1(15-hydroxyprostaglandin dehydrogenase [NAD(+)]-like [Spodoptera litura])
TRINITY_DN43676_c0_g1	0.0538517	-4.21486	1.93e-14	8.55e-12	yes	down	29.6783	2.23706	25.66	22.13	21.5	18.08	55.88	34.82	2.31	2.63	2.6	1.73	2.08	2.3	3.37	1.2	1.39	3.09	3.38	1.58	3.17	2.22	3.25	0.42	1.31	XP_022814955.1(uncharacterized protein LOC111348537 [Spodoptera litura])
TRINITY_DN61534_c0_g1	0.00443778	-7.81594	1.97e-14	8.7e-12	yes	down	6740.83	37.76	5835.04	10827	4178.56	7625.68	6848.49	5130.25	20.69	4.12	9.99	8.39	6.33	9.08	96.82	119.27	3.99	3.32	19.91	32.37	28.45	28.54	84.25	85.31	81.09	None
TRINITY_DN46340_c0_g1	0.0661667	-3.91775	2.18e-14	9.61e-12	yes	down	28.3717	2.70235	29.26	23	24.44	28.34	38.69	26.5	1.86	1.16	1.9	4.54	4.7	4.32	1.24	3.03	2.26	1.61	2.11	3.62	4.17	4.07	1.3	2.15	1.9	XP_022824644.1(probable alpha-glucosidase Os06g0675700 [Spodoptera litura])
TRINITY_DN56899_c0_g1	0.0460129	-4.44182	2.19e-14	9.63e-12	yes	down	28.9183	1.84412	32.48	30.11	25.78	26.52	31.89	26.73	0.69	0.54	0.61	2.14	1.44	1.18	2.02	3.2	1.19	1.01	1.43	1.84	2.62	1.49	2.29	4.02	3.64	XP_022829783.1(cholinesterase 1-like [Spodoptera litura])
TRINITY_DN53338_c0_g1	0.0922507	-3.4383	2.21e-14	9.68e-12	yes	down	37.1633	4.84647	39.19	35.74	31.93	26.08	47.23	42.81	3.1	1.69	3.07	5.79	3.69	3.99	6.32	5.1	6.42	3.81	4.45	3.87	5.57	5.52	5.01	6.79	8.2	XP_022830845.1(glucose dehydrogenase [FAD, quinone]-like isoform X1 [Spodoptera litura])
TRINITY_DN58919_c0_g1	0.00952989	-6.71332	2.45e-14	1.07e-11	yes	down	221.05	2.71765	209.56	322.4	159.67	186.08	198.47	250.12	0.48	0.73	0.92	1.75	1.3	0.87	6.05	10.93	0.91	0.6	0.92	1.71	1.63	2.33	3.42	8.36	3.29	CAR92522.1(putative dsRNase [Spodoptera littoralis])
TRINITY_DN61600_c1_g6	0.00250083	-8.64338	2.46e-14	1.08e-11	yes	down	33.185	0.101176	34.1	20.66	50.84	41.29	35.42	16.8	0	0	0	0	0	0	0.16	0.61	0	0	0	0	0.09	0	0.51	0.09	0.26	None
TRINITY_DN61720_c2_g1	0.00757481	-7.04457	2.51e-14	1.1e-11	yes	down	21.105	0.100588	15.03	18.83	13.33	15.41	26.15	37.88	0	0	0	0	0	0	1.71	0	0	0	0	0	0	0	0	0	0	XP_022818112.1(esterase FE4-like [Spodoptera litura])
TRINITY_DN62689_c2_g2	11.8823	3.57074	2.55e-14	1.11e-11	yes	up	2.61667	43.7882	2.45	2.05	1.97	4.07	2.88	2.28	32.04	28.59	32.28	39.17	42.47	49.95	33.63	60.75	43.77	35.27	32.94	43.01	35.54	46.11	65.53	65.99	57.36	XP_022814086.1(transcription factor sem-2-like [Spodoptera litura])
TRINITY_DN38682_c0_g1	0.00797079	-6.97106	2.56e-14	1.11e-11	yes	down	15.1067	0.158824	13.12	15.65	12.81	26.06	12.25	10.75	0	0	0.28	0	0.81	0	0	0.5	0.28	0	0	0.39	0	0.22	0	0	0.22	None
TRINITY_DN55162_c2_g1	0.00196778	-8.98921	2.58e-14	1.12e-11	yes	down	54.46	0.162941	48.03	69.13	60.79	51.51	46.47	50.83	0	0	0	0	0.12	0	0.76	0.05	0.12	0	0.14	0.11	0	0.25	0	0.93	0.29	XP_022827545.1(transmembrane protease serine 9-like isoform X2 [Spodoptera litura])
TRINITY_DN57986_c3_g2	0.00450164	-7.79533	2.63e-14	1.14e-11	yes	down	51.7683	0.308824	58.02	71.6	48.16	36.22	41.87	54.74	0.18	0.07	0	0	0.23	0.36	0.9	1.55	0.16	0	0.17	0.14	0	0.07	0.46	0.72	0.24	XP_022824512.1(pancreatic triacylglycerol lipase-like [Spodoptera litura])
TRINITY_DN61609_c0_g1	0.046607	-4.42331	2.68e-14	1.16e-11	yes	down	9.74167	0.675294	12.51	6.89	8.14	10.3	11.05	9.56	1.02	0.32	0.38	1.69	0.71	1.35	0.28	0.32	0.4	0.58	0.65	1.06	1.19	0.84	0.26	0.17	0.26	XP_022817996.1(proton-coupled folate transporter-like [Spodoptera litura])
TRINITY_DN56822_c0_g1	0.00962112	-6.69958	2.68e-14	1.15e-11	yes	down	40.61	0.508235	35.67	25	40.61	36.24	53.89	52.25	0.19	0.3	0.2	0.86	0.94	0.78	0.03	0.25	0.16	0.11	0.2	1.42	1.25	1.48	0.1	0.09	0.28	XP_022834390.1(tyrosine aminotransferase-like [Spodoptera litura])
TRINITY_DN53332_c0_g1	0.0661074	-3.91904	2.74e-14	1.18e-11	yes	down	440.462	42.0288	520.47	345.95	291.85	505.18	512.53	466.79	46.98	31.93	41.06	32.93	35.54	31.7	3.32	83.72	37.26	54.9	25.97	35.45	33.29	33.88	73.86	48.5	64.2	None
TRINITY_DN159843_c0_g1	0.00866288	-6.85094	2.81e-14	1.2e-11	yes	down	3.97	0.0482353	5.66	2.24	5.74	3.01	3.54	3.63	0	0.04	0.1	0.03	0.02	0.1	0.01	0	0.04	0.03	0.02	0.04	0.11	0.17	0.01	0.1	0	XP_022834551.1(uncharacterized protein LOC111362209 [Spodoptera litura])
TRINITY_DN62823_c0_g3	0.0147345	-6.08466	2.81e-14	1.2e-11	yes	down	5.52167	0.111176	5.51	8.14	3.87	5.51	2.84	7.26	0.02	0.27	0.16	0.17	0.31	0.15	0.08	0.02	0.13	0.12	0.07	0.18	0.11	0.04	0	0.04	0.02	XP_022828317.1(organic cation transporter protein-like [Spodoptera litura])
TRINITY_DN7523_c0_g1	0.00497853	-7.65006	2.91e-14	1.24e-11	yes	down	5.565	0.0317647	4.58	2.09	2.48	4.49	13.97	5.78	0	0	0	0	0	0	0	0.07	0.08	0	0.32	0	0	0	0.07	0	0	XP_022816754.1(endocuticle structural glycoprotein SgAbd-5-like [Spodoptera litura])
TRINITY_DN60709_c0_g1	0.00765866	-7.02869	2.95e-14	1.26e-11	yes	down	3.2	0.0252941	3.87	2.18	2.1	2.03	6.82	2.2	0	0	0	0	0	0	0	0	0	0	0	0	0	0.43	0	0	0	None
TRINITY_DN63252_c5_g1	0.00372939	-8.06684	3.04e-14	1.29e-11	yes	down	8.86833	0.0147059	9.47	12.03	22.92	3.81	0	4.98	0	0	0	0	0	0	0	0	0	0	0	0	0.25	0	0	0	0	None
TRINITY_DN62584_c0_g1	0.00268079	-8.54313	3.1e-14	1.32e-11	yes	down	54.515	0.118824	72.36	35.31	99.35	89.81	30.26	0	0	0	0	0	0	0	0	1.27	0	0	0.75	0	0	0	0	0	0	None
TRINITY_DN49365_c0_g1	0.000398544	-11.293	3.37e-14	1.43e-11	yes	down	176.092	0	205.97	257.34	103.53	155.88	170.34	163.49	0	0	0	0	0	0	0	0	0	0	0	0	0	0	0	0	0	XP_022819165.1(TATA-binding protein-associated factor 2N-like [Spodoptera litura])
TRINITY_DN39877_c1_g1	0.0037153	-8.07231	3.5e-14	1.48e-11	yes	down	0.958333	0.00294118	0.32	2.45	0.67	2.05	0.14	0.12	0	0	0	0	0	0	0	0	0	0	0.05	0	0	0	0	0	0	XP_022835292.1(cholinesterase 2-like [Spodoptera litura])
TRINITY_DN877_c0_g1	0.12154	-3.0405	3.5e-14	1.48e-11	yes	down	32.62	5.63412	34.89	30.88	43.08	27.94	28.6	30.33	8.47	6.13	6.66	5	5.25	4.82	8.64	4.97	4.99	6.11	3.85	4.06	5.39	5.19	4.89	4.69	6.67	None
TRINITY_DN25631_c0_g1	0.00838212	-6.89847	3.59e-14	1.51e-11	yes	down	13.025	0.143529	10.21	10.75	13.35	12.05	16.87	14.92	0.12	0	0	0.52	0.05	0	0.21	0.29	0.33	0.12	0.11	0	0.11	0.05	0.21	0.27	0.05	XP_022817725.1(isopentenyl-diphosphate Delta-isomerase 1-like [Spodoptera litura])
TRINITY_DN63981_c4_g1	0.157052	-2.67069	3.7e-14	1.55e-11	yes	down	570.855	127.619	504.08	551.73	621.81	530.75	481.86	734.9	115.66	97.91	127.01	206.53	190.94	190.69	80.03	61.11	139.16	121.39	133.57	177.14	149.99	182.08	67.66	67.85	60.81	XP_022829251.1(coatomer subunit beta [Spodoptera litura])
TRINITY_DN45108_c0_g1	0.0106714	-6.55011	3.8e-14	1.59e-11	yes	down	8.76833	0.138824	4.88	7.65	7.64	5.93	15.87	10.64	0.07	0.38	0.22	0.19	0.06	0.32	0.06	0.05	0.19	0	0.31	0.05	0.06	0.4	0	0	0	XP_022818471.1(probable sodium-coupled neutral amino acid transporter 6 [Spodoptera litura])
TRINITY_DN57792_c0_g1	0.143875	-2.79711	4e-14	1.68e-11	yes	down	134.003	28.1988	147.18	92.43	106.69	142.41	132.72	182.59	33.75	31.14	34.22	32.32	27.85	27.77	7.75	14.88	41.63	38.01	40.91	34.24	31.47	34	14.22	22.62	12.6	XP_021194278.1(zinc transporter ZIP1-like [Helicoverpa armigera])
TRINITY_DN40380_c1_g1	0.00549977	-7.50641	4.12e-14	1.72e-11	yes	down	8.60833	0.0594118	6.15	12.87	18.49	5.96	3.12	5.06	0	0.09	0	0	0.08	0	0.08	0	0	0	0.36	0.07	0	0	0.08	0	0.25	None
TRINITY_DN48379_c1_g1	0.00617657	-7.33898	4.13e-14	1.72e-11	yes	down	7.01833	0.0482353	5.98	5.39	5.83	9.57	5.76	9.58	0.66	0.16	0	0	0	0	0	0	0	0	0	0	0	0	0	0	0	None
TRINITY_DN59600_c1_g1	0.1427	-2.80895	4.2e-14	1.75e-11	yes	down	174.89	36.61	116.01	228.4	198.21	210.51	145.75	150.46	33.59	33.99	35.44	44.31	52.77	38.89	14.14	27.39	44.81	35.17	33.95	42.93	42.95	48.64	19.34	42.2	31.86	XP_022820091.1(HIG1 domain family member 1A, mitochondrial-like [Spodoptera litura])
TRINITY_DN48419_c0_g1	0.00334032	-8.2258	4.23e-14	1.75e-11	yes	down	1.75333	0.00705882	0.65	0.95	3.59	5.03	0.19	0.11	0	0.02	0.04	0.02	0	0	0	0	0	0	0.02	0	0	0.02	0	0	0	XP_022816321.1(peroxidase-like [Spodoptera litura])
TRINITY_DN59573_c8_g3	0.054954	-4.18563	4.26e-14	1.77e-11	yes	down	19.3967	1.48118	19.92	21.13	16.92	17.14	23.59	17.68	1.28	0.59	0.6	0.93	1.22	2.07	2.26	2.54	0.82	0.55	1.02	1.78	0.94	1.41	1.75	3.66	1.76	XP_022820468.1(uncharacterized protein LOC111352270 isoform X2 [Spodoptera litura])
TRINITY_DN3222_c0_g1	0.00135922	-9.52301	4.3e-14	1.78e-11	yes	down	121.592	0.215294	124.55	124.52	75.12	123.11	153.35	128.9	0	0	0	0	0	0	0.16	0.15	0	0	0	0	0	0	0	2.54	0.81	XP_022816902.1(uncharacterized protein LOC111349853 isoform X14 [Spodoptera litura])
TRINITY_DN43939_c0_g1	0.0543516	-4.20153	4.46e-14	1.84e-11	yes	down	14.6733	1.23647	18.1	9.91	11.32	20.97	17.96	9.78	0.66	0.59	0.74	1.07	1.06	1.06	1.05	1.87	0.74	0.49	1.02	1.45	1.11	1.5	1.78	2.65	2.18	None
TRINITY_DN58732_c0_g1	0.00763854	-7.03249	4.59e-14	1.89e-11	yes	down	1.625	0.0158824	1.32	2.66	0.75	0.88	0.41	3.73	0.02	0.07	0.04	0	0.02	0	0.02	0.02	0	0	0.02	0	0	0	0.04	0	0.02	XP_022826306.1(cholinesterase 1-like [Spodoptera litura])
TRINITY_DN55008_c1_g1	0.0128225	-6.28518	4.63e-14	1.9e-11	yes	down	9.37167	0.26	6.41	8.01	7.2	5.51	18.06	11.04	0.21	0.3	0.16	0.28	0.15	1.04	0.07	0.02	0.64	0.45	0.03	0.4	0.23	0.39	0.05	0	0	XP_022818471.1(probable sodium-coupled neutral amino acid transporter 6 [Spodoptera litura])
TRINITY_DN129118_c0_g1	0.012625	-6.30757	4.83e-14	1.98e-11	yes	down	1.49	0.00882353	0.7	1.52	1.39	2.34	1.8	1.19	0	0	0.15	0	0	0	0	0	0	0	0	0	0	0	0	0	0	None
TRINITY_DN39640_c0_g2	0.00724098	-7.1096	4.85e-14	1.99e-11	yes	down	11.3633	0.111176	11	12.59	9.97	12.25	12.28	10.09	0	0	0.1	0	0.09	0	0.05	0.46	0.1	0.16	0	0.12	0.05	0.05	0.09	0.14	0.48	XP_022815502.1(trypsin, alkaline C-like [Spodoptera litura])
TRINITY_DN57562_c0_g1	0.0675593	-3.8877	4.95e-14	2.02e-11	yes	down	19.0017	1.79471	18.26	18.91	18.62	18.74	21.23	18.25	0.74	1.48	1.11	1.2	1.48	1.19	2.67	1.82	1.45	1.47	1.47	1.98	1.32	0.91	2.55	3.99	3.68	XP_022821344.1(uncharacterized protein LOC111352888 [Spodoptera litura])
TRINITY_DN57643_c2_g1	0.00935738	-6.73968	4.96e-14	2.02e-11	yes	down	1.16667	0.00941177	1.08	0.92	1.01	0.82	1.86	1.31	0	0	0	0.11	0	0	0	0	0	0	0	0	0	0.05	0	0	0	None
TRINITY_DN39363_c0_g1	0.0101517	-6.62214	5.12e-14	2.08e-11	yes	down	2.45333	0.0117647	3.52	0.19	2.1	3.54	3.12	2.25	0	0	0.2	0	0	0	0	0	0	0	0	0	0	0	0	0	0	None
TRINITY_DN52551_c0_g1	0.033316	-4.90764	5.31e-14	2.16e-11	yes	down	31.2633	1.49588	23.97	20.26	31.5	49.91	35.17	26.77	1.23	0.61	1.43	0.77	3.37	1.41	0.55	0.97	3.61	1.7	3.28	2.29	1.09	1.88	0.58	0.44	0.22	XP_022816770.1(cuticle protein 19-like [Spodoptera litura])
TRINITY_DN63575_c7_g2	0.0369822	-4.75702	5.43e-14	2.2e-11	yes	down	3.385	0.179412	3.02	2.49	3.48	5.83	2.68	2.81	0.12	0.15	0.06	0.11	0.07	0.1	0.06	0.47	0.3	0.26	0.15	0.18	0.06	0.13	0.18	0.22	0.43	PCG77029.1(hypothetical protein B5V51_8207 [Heliothis virescens])
TRINITY_DN43903_c0_g1	0.00498894	-7.64705	5.5e-14	2.23e-11	yes	down	9.16333	0.0611765	7.08	5.07	2.92	16.75	11.76	11.4	0.17	0.24	0.06	0	0	0	0.03	0.08	0.03	0.16	0.15	0	0	0	0.03	0	0.09	None
TRINITY_DN49612_c0_g1	0.0405176	-4.62531	5.52e-14	2.23e-11	yes	down	37.78	2.19059	38.76	41.63	30.7	33.8	40.39	41.4	3.03	1.52	2.37	4.79	2.8	3.42	1.14	1.09	2.3	1.54	2.38	2.25	2.94	4.1	0.55	0.29	0.73	XP_021183812.1(LOW QUALITY PROTEIN: signal peptidase complex subunit 3 [Helicoverpa armigera])
TRINITY_DN62000_c0_g2	0.133789	-2.90197	5.57e-14	2.25e-11	yes	down	252.295	47.9106	269.57	272.96	245.2	200.43	319.38	206.23	48.61	51.28	56.42	21.97	22.79	25.62	51.59	71.18	59.24	51.56	55.93	24.36	21.78	25.58	87.62	67.33	71.62	XP_022832802.1(basement membrane-specific heparan sulfate proteoglycan core protein-like isoform X3 [Spodoptera litura])
TRINITY_DN120684_c0_g1	0.0991352	-3.33446	5.57e-14	2.24e-11	yes	down	8.89833	1.28412	10.36	7.14	5.23	8.21	10.83	11.62	1.24	1.32	1.62	0.78	1.03	0.96	0.64	1.31	1.63	1.22	0.91	0.83	0.87	0.9	1.89	2.09	2.59	XP_022815603.1(transient receptor potential channel pyrexia-like [Spodoptera litura])
TRINITY_DN58553_c3_g2	0.00718144	-7.12151	5.78e-14	2.32e-11	yes	down	207.153	1.57294	163.38	157.87	249.97	257.83	199.1	214.77	0	0	0	8.25	0	0	0	4.39	0	0	14.1	0	0	0	0	0	0	None
TRINITY_DN31231_c0_g1	0.0224527	-5.47697	5.84e-14	2.34e-11	yes	down	9.19833	0.294706	8.91	8.06	6.87	2.83	15.25	13.27	0.26	0.36	0.44	0.3	0.46	0.35	0.05	0.1	0.35	0.22	0.24	0.45	0.51	0.6	0	0.09	0.23	XP_022816240.1(multiple inositol polyphosphate phosphatase 1-like [Spodoptera litura])
TRINITY_DN53784_c0_g1	0.00243976	-8.67905	5.93e-14	2.37e-11	yes	down	141.703	0.526471	149.15	79.37	337.55	203.91	39.55	40.69	0.16	0.08	0	0	0.28	0	1.1	1.46	0.31	0.33	0.62	0.32	0	0.14	2.14	0.83	1.18	XP_022816666.1(larval cuticle protein LCP-17-like [Spodoptera litura])
TRINITY_DN60294_c0_g1	0.230385	-2.11788	6.17e-14	2.46e-11	yes	down	341.318	112.562	274.25	319.74	237.1	279.07	531.41	406.34	121.48	127.84	110.62	135.3	141.75	152.02	40.58	85.08	108.38	102.84	112.81	136.34	111.57	121.6	92.86	78.99	133.49	ACW82828.1(ornithine decarboxylase [Spodoptera litura])
TRINITY_DN59081_c1_g1	0.151199	-2.72548	6.26e-14	2.49e-11	yes	down	57.105	12.7076	77.51	53.42	58.66	53.93	47.62	51.49	15.06	13.24	17.53	14.54	11.92	13.32	4.21	8.96	18.22	15.92	16.12	15.39	14.08	14.16	6.6	8.74	8.02	XP_022819667.1(SEC14-like protein 2 [Spodoptera litura])
TRINITY_DN60459_c9_g3	0.00352172	-8.1495	6.27e-14	2.49e-11	yes	down	39.785	0.216471	44.53	28.23	33.39	52.15	41.92	38.49	0.43	0.49	0.16	0	0	0	0.36	0.81	0	0	0.25	0	0	0.05	0.21	0.49	0.43	XP_022828602.1(pro-resilin-like isoform X1 [Spodoptera litura])
TRINITY_DN7002_c0_g1	0.00447279	-7.80461	6.73e-14	2.67e-11	yes	down	2.09667	0.00941177	2.83	1.74	4.23	0.17	1.22	2.39	0	0	0	0	0	0	0	0.05	0	0	0	0	0	0.08	0	0.03	0	XP_021204843.1(cAMP-dependent protein kinase catalytic subunit alpha [Bombyx mori])
TRINITY_DN52285_c0_g1	0.00330538	-8.24097	6.73e-14	2.67e-11	yes	down	12.5433	0.0388235	4.56	14.15	9.67	25.13	14.76	6.99	0	0	0	0	0	0	0.16	0	0	0	0	0	0	0	0	0.25	0.25	AKT26503.1(odorant binding protein 26 [Spodoptera exigua])
TRINITY_DN49585_c0_g1	0.00811802	-6.94466	6.96e-14	2.75e-11	yes	down	5.94833	0.06	4.64	5.37	7.56	1.71	9.79	6.62	0	0	0.22	0	0	0.09	0	0	0	0.24	0	0.17	0.11	0	0	0	0.19	None
TRINITY_DN40840_c0_g1	0.007629	-7.03429	7.05e-14	2.78e-11	yes	down	8.685	0.0805882	8.57	10.09	4.87	8.2	9.71	10.67	0	0.17	0	0.16	0.48	0	0.22	0	0.17	0	0	0	0.17	0	0	0	0	None
TRINITY_DN102815_c0_g1	0.0118276	-6.4017	7.49e-14	2.95e-11	yes	down	1.36667	0.00647059	1.83	1.94	0.44	0.75	2.08	1.16	0	0	0	0	0	0	0	0	0	0	0	0.11	0	0	0	0	0	XP_022835294.1(uncharacterized protein LOC111362778 [Spodoptera litura])
TRINITY_DN63699_c11_g1	0.0405851	-4.6229	7.65e-14	3.01e-11	yes	down	19.4667	2.04294	16.53	28.74	19.62	9.53	22.71	19.67	4.16	0.19	1.69	2.13	2.79	1.62	1.04	2.97	1.21	1.86	2.18	1.07	1.56	1.13	1.77	3.77	3.59	None
TRINITY_DN120622_c0_g1	0.0728758	-3.77842	7.79e-14	3.06e-11	yes	down	15.8717	1.61059	12.87	9.96	14.74	14.59	20.59	22.48	1.35	0.93	0.95	1.22	0.9	1.12	1.35	3.16	1.43	0.9	0.98	1.54	1.48	1.36	3.16	3.39	2.16	XP_022824222.1(fatty acyl-CoA reductase 1 [Spodoptera litura])
TRINITY_DN54129_c4_g2	0.011569	-6.4336	7.93e-14	3.11e-11	yes	down	4.77333	0.0352941	8.16	3.97	4.49	4.02	4.56	3.44	0	0	0	0.3	0	0	0.3	0	0	0	0	0	0	0	0	0	0	None
TRINITY_DN54888_c3_g1	0.0024618	-8.66607	7.97e-14	3.12e-11	yes	down	158.82	0.528235	113.34	419.69	126.6	160.72	56.22	76.35	0	0.38	0.12	0.11	0	0.11	0.92	3.22	0.12	0.4	0.26	0.1	0	0	0.95	2.05	0.24	None
TRINITY_DN37260_c0_g1	0.00991383	-6.65634	8.14e-14	3.18e-11	yes	down	50.9333	0.214706	10.17	101.66	18.3	57.2	36.38	81.89	0	0	0	0	0	0	0	0	0	0	0	3.65	0	0	0	0	0	None
TRINITY_DN52532_c0_g1	0.0275722	-5.18064	8.21e-14	3.2e-11	yes	down	184.692	6.81471	166.93	169.46	144.93	180.2	240.53	206.1	2.81	2.57	4.1	3.93	3.31	2.82	18.74	14.31	2.83	3.52	2.69	4.17	2.74	3.03	12.84	17.11	14.33	XP_022820774.1(alpha-tocopherol transfer protein-like [Spodoptera litura])
TRINITY_DN21519_c0_g1	0.00977367	-6.67688	8.25e-14	3.21e-11	yes	down	78.5667	0.897059	94.95	45.9	99.03	82.66	74.9	73.96	0	1.3	1.2	2.3	0	5.55	1.15	0	0	0	1.37	1.09	1.29	0	0	0	0	None
TRINITY_DN54788_c0_g3	0.0046861	-7.7374	8.51e-14	3.31e-11	yes	down	16.3533	0.0788235	12.53	1.49	37.25	25	8.17	13.68	0	0	0	0	0	0	0	0.61	0	0.5	0	0	0.23	0	0	0	0	XP_022816373.1(larval cuticle protein 1-like [Spodoptera litura])
TRINITY_DN57493_c1_g3	0.0135111	-6.20971	8.65e-14	3.35e-11	yes	down	6.06833	0.0941176	5.21	9.84	5.03	7.13	3.47	5.73	0.07	0	0.44	0.13	0.06	0.06	0	0.03	0.1	0.11	0.18	0.15	0.13	0.07	0	0.07	0	XP_022828317.1(organic cation transporter protein-like [Spodoptera litura])
TRINITY_DN56217_c1_g2	19.2337	4.26557	8.85e-14	3.42e-11	yes	up	1.755	50.27	1.4	1.36	1.6	2.16	1.71	2.3	97.62	85.79	95.09	29.92	30.71	32.69	34.87	22.59	73.15	74.04	75.48	29.54	25.32	28.29	36.41	38.11	44.97	AGH12217.1(delta 11 desaturase [Spodoptera litura])
TRINITY_DN58563_c2_g1	0.0249293	-5.32601	9.51e-14	3.67e-11	yes	down	4.66667	0.165882	3.6	3.72	1.09	5.02	6.53	8.04	0.09	0.28	0.3	0.18	0.08	0.07	0	0.14	0.11	0.15	0.06	0.23	0.21	0.08	0.31	0.32	0.21	XP_022823363.1(uncharacterized protein LOC111354256 [Spodoptera litura])
TRINITY_DN57426_c1_g1	0.0126782	-6.3015	9.54e-14	3.68e-11	yes	down	19.5633	0.45	14.63	22.08	28.08	26.58	12.73	13.28	0.15	0.05	0.04	0.39	0.28	0.33	0.8	1.43	0.07	0.06	0.06	0.3	0.24	0.18	0.76	1.63	0.88	XP_022826080.1(chymotrypsin-1-like [Spodoptera litura])
TRINITY_DN50788_c1_g1	0.0022139	-8.8192	9.57e-14	3.68e-11	yes	down	5.54833	0.0129412	6.48	6.22	10.21	0.58	2.31	7.49	0	0.02	0.02	0	0.01	0	0	0.14	0	0	0	0	0	0	0	0	0.03	XP_022814756.1(O-acyltransferase like protein-like [Spodoptera litura])
TRINITY_DN57119_c1_g4	0.00410083	-7.92987	9.59e-14	3.68e-11	yes	down	12.1783	0.0623529	10.59	11.28	14.3	13.18	12.24	11.48	0.07	0	0.12	0	0	0	0.28	0	0	0	0	0	0	0	0.23	0.3	0.06	None
TRINITY_DN59172_c0_g3	0.090109	-3.47218	9.7e-14	3.72e-11	yes	down	803.37	113.256	1068.08	752.76	767.36	811.54	788.75	631.73	107.35	150.88	68.6	124.26	135.95	163.92	25.98	63.52	164.44	104.6	161.18	153.78	155.04	167.92	71.04	53.42	53.47	None
TRINITY_DN62907_c2_g1	0.116756	-3.09843	9.86e-14	3.77e-11	yes	down	345.602	72.9147	289.37	391.3	270.9	285.4	522.89	313.75	88.12	61.97	44.25	61.82	89.18	97.74	116.64	27.1	62.31	66.45	88.11	82.11	58.6	68.04	90.41	83.36	53.34	XP_022825873.1(SPARC [Spodoptera litura])
TRINITY_DN83755_c0_g1	0.000384496	-11.3447	9.96e-14	3.8e-11	yes	down	16.0717	0	15.05	33.3	15.44	8.67	8.9	15.07	0	0	0	0	0	0	0	0	0	0	0	0	0	0	0	0	0	XP_022815738.1(trypsin, alkaline C-like [Spodoptera litura])
TRINITY_DN30317_c0_g1	0.00293966	-8.41013	1.02e-13	3.89e-11	yes	down	13.445	0.0482353	12.27	11.6	13.89	12.07	15.7	15.14	0	0	0.04	0	0	0	0.26	0.17	0	0	0	0	0	0	0.04	0.27	0.04	XP_022818053.1(acetylcholinesterase-like [Spodoptera litura])
TRINITY_DN51764_c0_g1	0.00181926	-9.10243	1.04e-13	3.94e-11	yes	down	318.265	0.751765	294.44	365.95	424.6	269.98	181.77	372.85	0.3	0	0	0.13	0.13	0.12	2.52	3.84	0	0	0	0.12	0.4	0.4	2.13	1.9	0.79	OXJ64470.1(hypothetical protein CDL32_26650, partial [Escherichia coli])
TRINITY_DN23162_c0_g1	0.0114012	-6.45467	1.07e-13	4.05e-11	yes	down	2.11833	0.0217647	2.29	1.37	2.58	2.85	1.43	2.19	0	0.1	0	0	0	0	0	0.17	0	0	0	0	0	0	0	0	0.1	None
TRINITY_DN53560_c0_g1	0.0049837	-7.64857	1.11e-13	4.21e-11	yes	down	2.265	0.0111765	1.44	2.14	2.67	2.01	2.37	2.96	0	0	0	0	0.02	0	0	0	0	0	0.02	0	0.13	0.02	0	0	0	PCG62852.1(hypothetical protein B5V51_13501, partial [Heliothis virescens])
TRINITY_DN99882_c0_g1	0.00990669	-6.65738	1.12e-13	4.23e-11	yes	down	17.9483	0.124118	9.73	17.03	16.83	34.42	18.64	11.04	0	0	0	0	2.11	0	0	0	0	0	0	0	0	0	0	0	0	None
TRINITY_DN61264_c0_g1	0.119858	-3.06061	1.14e-13	4.29e-11	yes	down	20.4583	3.17294	25.04	21.71	13.25	21.38	25.79	15.58	4.09	3.35	4.84	1.9	1.85	1.91	3.38	3.15	3.49	3.4	3.76	1.76	1.56	2.19	4.25	4.53	4.53	XP_022821186.1(MPN domain-containing protein CG4751 [Spodoptera litura])
TRINITY_DN59172_c1_g1	0.0924997	-3.43441	1.15e-13	4.34e-11	yes	down	76.3283	10.3494	94.37	59.79	70.06	83.44	82.82	67.49	9.91	11.21	9.31	10.64	9.49	18.49	1.73	5.39	16.1	10.59	15.17	14.9	10.76	14.5	6.5	4.72	6.53	XP_022816574.1(uncharacterized PE-PGRS family protein PE_PGRS54-like isoform X8 [Spodoptera litura])
TRINITY_DN54888_c4_g4	0.0052796	-7.56536	1.17e-13	4.42e-11	yes	down	14.26	0.06	19.24	17.81	26.1	5.8	7.28	9.33	0.4	0	0	0	0	0	0	0.11	0	0	0.06	0.15	0	0	0.17	0.13	0	XP_022826690.1(uncharacterized protein LOC111356522 [Spodoptera litura])
TRINITY_DN60751_c1_g1	40.5469	5.34152	1.24e-13	4.66e-11	yes	up	0.17	9.92294	0.22	0.17	0.32	0.16	0.07	0.08	8.19	7.91	9.91	12.34	12.61	11.25	11.66	7.58	10.44	7.52	10.99	12.14	9.2	10.28	9.92	9.12	7.63	None
TRINITY_DN38330_c0_g1	0.0103808	-6.58994	1.27e-13	4.77e-11	yes	down	0.648333	0.00352941	0.65	0.46	0.05	1.26	0.8	0.67	0	0.06	0	0	0	0	0	0	0	0	0	0	0	0	0	0	0	None
TRINITY_DN40380_c0_g1	0.00877443	-6.83248	1.29e-13	4.81e-11	yes	down	11.2	0.132353	9.75	16.22	17.02	9.67	6.35	8.19	0.14	0	0.07	0	0.42	0.22	0.3	0	0.06	0.42	0.07	0.05	0	0.06	0	0.25	0.19	XP_022816301.1(uncharacterized protein LOC111349430 [Spodoptera litura])
TRINITY_DN54720_c1_g1	0.0736403	-3.76336	1.29e-13	4.81e-11	yes	down	38.475	3.94	38.52	25.97	34.32	47.73	45.32	38.99	2.56	2.66	2.48	2.24	2.69	2.16	4.6	9.82	3.85	3.35	3.41	2.36	1.96	1.93	7.07	6.76	7.08	ARD71192.1(fatty acyl reductase [Spodoptera exigua])
TRINITY_DN44088_c0_g1	0.00768064	-7.02456	1.32e-13	4.93e-11	yes	down	2.48833	0.0252941	1.78	1.98	1.87	2.24	4.12	2.94	0.13	0.02	0.02	0.02	0.07	0	0	0	0.06	0.06	0	0.03	0	0	0	0.02	0	XP_022829420.1(carbohydrate sulfotransferase 4-like [Spodoptera litura])
TRINITY_DN62584_c1_g2	0.00112811	-9.79188	1.37e-13	5.08e-11	yes	down	4661.23	6.83941	5297.09	4444.79	7146.99	5998.94	3167.09	1912.51	1.14	0.62	4.6	0.86	0.86	0.68	29.2	13.18	0.98	0.53	0.76	0.47	1.01	1.12	25.9	12.36	22	XP_022814059.1(larval cuticle protein LCP-17-like [Spodoptera litura])
TRINITY_DN39787_c1_g1	0.0069766	-7.16326	1.38e-13	5.14e-11	yes	down	6.19	0.0705882	3.41	6.58	9.62	6.37	6.76	4.4	0	0	0.41	0	0	0.12	0	0.31	0	0.08	0	0	0	0	0	0.07	0.21	XP_022827725.1(cytochrome P450 4C1-like isoform X1 [Spodoptera litura])
TRINITY_DN748_c0_g1	0.00924972	-6.75637	1.41e-13	5.22e-11	yes	down	11.7617	0.15	9.93	12.7	3.92	12.29	19.63	12.1	0.11	0.2	0	0	0	0	0	0.34	0.58	0.21	0.2	0.16	0	0	0.37	0.19	0.19	None
TRINITY_DN58635_c0_g3	0.143101	-2.8049	1.44e-13	5.32e-11	yes	down	50.625	9.92824	41.95	36.35	50.88	64.32	50.97	59.28	6.36	6.83	7.16	11.74	9.1	9.84	11.64	13.87	9.03	9.29	10.38	8.16	6.79	10.62	13.09	12.84	12.04	XP_022833647.1(DNA ligase 1-like [Spodoptera litura])
TRINITY_DN49535_c1_g1	0.00525264	-7.57274	1.47e-13	5.45e-11	yes	down	1998.44	15.3129	2274	2265.4	1772.28	1687.18	2214.88	1776.91	0	1.35	33.05	0	9.14	2.82	12.98	43.93	3.92	9.06	7.1	2.79	0	12.16	20.22	82.07	19.73	None
TRINITY_DN63840_c4_g1	0.00799675	-6.96637	1.48e-13	5.45e-11	yes	down	7.145	0.0411765	5.36	1.5	4.08	19.16	2.4	10.37	0.36	0.17	0.17	0	0	0	0	0	0	0	0	0	0	0	0	0	0	None
TRINITY_DN25201_c0_g1	0.0526936	-4.24623	1.63e-13	6e-11	yes	down	5.83667	0.443529	6.26	6.18	4.09	8.16	6.36	3.97	0.83	0.27	0.35	0.61	0.46	0.24	0.6	0.84	0.37	0.28	0.38	0.22	0.06	0.3	0.61	0.58	0.54	XP_022817021.1(uncharacterized protein LOC111349912 [Spodoptera litura])
TRINITY_DN44523_c1_g1	0.000663214	-10.5582	1.63e-13	6.01e-11	yes	down	159.607	0	285.67	139.01	75.51	140.53	208.88	108.04	0	0	0	0	0	0	0	0	0	0	0	0	0	0	0	0	0	None
TRINITY_DN61993_c1_g1	0.0185453	-5.7528	1.66e-13	6.08e-11	yes	down	8.445	4.44529	4.23	24.59	4.13	3.5	9.66	4.56	0.04	4.2	7.55	10.87	10.16	1.76	0.35	0	12.1	6.54	0.04	10.32	2.15	7.28	2.1	0.11	0	XP_022816375.1(cytochrome P450 4C1-like [Spodoptera litura])
TRINITY_DN61601_c0_g1	0.11771	-3.08669	1.72e-13	6.29e-11	yes	down	1791.62	296.966	1588.83	1646.01	2052.02	1664.14	1595.64	2203.07	215.96	200.18	239.21	499.52	489.47	498.09	194.96	145.96	271.49	247.86	271.45	455.42	361.53	542.82	131.33	154.1	129.08	AHW40461.1(actin, partial [Zygaena filipendulae])
TRINITY_DN63389_c3_g1	206.872	7.69259	1.74e-13	6.35e-11	yes	up	1.325	402.303	1.1	1.02	1.22	1.3	1.96	1.35	274.91	354.8	336.5	859.69	994.29	626.09	88.97	56.61	338.08	374.89	311.61	541.34	596.76	709.45	80.6	164.95	129.61	XP_022816388.1(maltase A1-like isoform X1 [Spodoptera litura])
TRINITY_DN32366_c0_g1	0.0421062	-4.56982	1.77e-13	6.46e-11	yes	down	31.915	1.88412	25.75	33.09	25.55	31.42	44.65	31.03	1.16	1.62	0.63	2.31	2.88	2.87	1.61	0.99	1.93	1.86	2.34	3.71	3.17	3.35	0.18	0.57	0.85	XP_022824736.1(pro-resilin [Spodoptera litura])
TRINITY_DN60894_c1_g1	0.0229915	-5.44275	1.88e-13	6.86e-11	yes	down	22.8933	0.605294	22.75	22.22	38.72	28.04	7.65	17.98	0.38	0	0.43	0.27	0.26	0.23	0.61	0.38	0.29	1.67	1.59	0.93	2.05	0.59	0.12	0.04	0.45	XP_022826751.1(uncharacterized protein LOC111356576 [Spodoptera litura])
TRINITY_DN63411_c2_g1	0.203167	-2.29926	1.93e-13	7.03e-11	yes	down	47.3067	14.6971	48.25	63.08	38.98	38	40.05	55.48	14.53	14.15	14.87	16.21	15.37	13.94	13.85	7.28	15.43	23.51	16.94	15.6	15.81	16.7	9.18	16.27	10.21	XP_022813848.1(myosin-IB isoform X1 [Spodoptera litura])
TRINITY_DN57818_c3_g2	0.00293104	-8.41437	1.96e-13	7.12e-11	yes	down	3.45167	0.00882353	2.36	1.81	10.21	1.99	0	4.34	0	0	0.15	0	0	0	0	0	0	0	0	0	0	0	0	0	0	XP_022827108.1(fatty acyl-CoA reductase wat-like [Spodoptera litura])
TRINITY_DN59940_c2_g2	0.0910513	-3.45718	1.98e-13	7.16e-11	yes	down	14.4233	1.86118	17.69	18.07	8.78	10.19	17.69	14.12	1.27	0.76	1	1.71	1.76	1.53	1.89	1.95	1.68	1.19	1.74	2.3	2.55	2.42	2.18	3.33	2.38	XP_022821780.1(uncharacterized protein LOC111353128 [Spodoptera litura])
TRINITY_DN59164_c1_g2	0.115822	-3.11002	2.09e-13	7.58e-11	yes	down	11.365	1.95059	10.99	8.84	13.85	11.34	9.05	14.12	1.23	2	1.46	2.93	2.82	2.32	1.17	1.39	1.75	1.33	1.88	2.9	2.38	3.11	1.62	1.54	1.33	None
TRINITY_DN59920_c0_g1	0.0184869	-5.75735	2.1e-13	7.6e-11	yes	down	24.8733	0.719412	29.75	23.88	12.37	27.47	29.17	26.6	1.39	2.1	1.12	0.75	0	0.45	0.15	0.42	2.1	0.88	0.85	0.82	0.16	0.62	0.16	0	0.26	XP_022830993.1(sodium-dependent nutrient amino acid transporter 1-like [Spodoptera litura])
TRINITY_DN52571_c0_g1	0.00313303	-8.31822	2.12e-13	7.64e-11	yes	down	6.56833	0.0211765	8.73	7.82	11.26	0.24	4.58	6.78	0	0	0	0	0	0	0	0.3	0	0	0	0	0	0	0.06	0	0	XP_022816712.1(UPF0728 protein v1g117062-like [Spodoptera litura])
TRINITY_DN58072_c10_g1	0.012366	-6.33748	2.21e-13	7.95e-11	yes	down	0.351667	0.00352941	0.36	0.42	0.31	0.37	0.39	0.26	0.06	0	0	0	0	0	0	0	0	0	0	0	0	0	0	0	0	None
TRINITY_DN55549_c0_g1	0.0534158	-4.22659	2.36e-13	8.48e-11	yes	down	12.5883	0.965294	11.42	12.16	13.51	15.46	10.64	12.34	0.68	0.79	1.25	1.46	1.52	1.85	0.11	0.4	0.89	0.96	1.04	1.15	0.86	1.91	0.67	0.53	0.34	XP_022814210.1(allatostatin [Spodoptera litura])
TRINITY_DN57269_c0_g1	0.00863988	-6.85477	2.44e-13	8.74e-11	yes	down	129.572	1.33824	116.3	50.75	108.17	228.95	134.16	139.1	5.21	0	0	0	0.04	0	0	0.06	4.51	0	1.07	0.04	0.05	0	11.68	0.07	0.02	XP_022834103.1(uncharacterized protein LOC111361894 [Spodoptera litura])
TRINITY_DN45894_c0_g2	0.00414848	-7.9132	2.48e-13	8.89e-11	yes	down	1.71667	0.00764706	2.82	0.77	0.08	4.13	0.54	1.96	0	0	0.06	0	0	0	0	0.03	0	0	0	0	0	0	0	0	0.04	XP_022828848.1(glucose dehydrogenase [FAD, quinone]-like [Spodoptera litura])
TRINITY_DN46045_c0_g1	0.120151	-3.05708	2.52e-13	9.01e-11	yes	down	8.87667	1.51882	8.09	9.41	8.26	10.65	9.75	7.1	1.18	1.25	1.63	1.42	1.37	1.32	1.48	2.56	1.36	1	1.43	1.45	1.07	1.31	1.8	1.98	2.21	None
TRINITY_DN47048_c0_g1	0.122777	-3.02588	2.57e-13	9.17e-11	yes	down	435.878	77.7876	559.85	447.71	402.51	431.46	434.81	338.93	83.21	83.62	70.56	83.31	95.27	103.83	22.44	42.7	118.49	86.78	111.75	98	69.35	89.39	67.86	47.06	48.77	None
TRINITY_DN54118_c0_g1	0.0602445	-4.05303	2.75e-13	9.8e-11	yes	down	5.195	0.437059	4.29	2.73	4.24	6.47	7.32	6.12	0.5	0.17	0.59	0.35	0.19	0.28	0.31	0.61	0.25	0.36	0.61	0.46	0.24	0.28	0.86	0.59	0.78	XP_022835589.1(alpha-tocopherol transfer protein-like [Spodoptera litura])
TRINITY_DN63060_c1_g2	0.145777	-2.77817	2.76e-13	9.81e-11	yes	down	32.755	6.64647	28.51	16.5	53.07	40.94	20.31	37.2	5.95	3.93	6.93	7.76	8.04	11.73	2.54	4.29	8.27	5.82	7.78	7.42	4.72	8.93	7.55	5.77	5.56	XP_022834668.1(filamin-A isoform X1 [Spodoptera litura])
TRINITY_DN63511_c3_g3	0.0106258	-6.55628	2.79e-13	9.93e-11	yes	down	68.5783	0.758824	83.33	62.31	43.28	38.38	85.01	99.16	0	1.56	0	0	3.89	1.33	0	0	0	0	0	2.23	0	1.19	0	0	2.7	None
TRINITY_DN62457_c5_g1	0.0153401	-6.02655	2.8e-13	9.94e-11	yes	down	5.06333	0.0811765	5.34	5.83	2.86	5.8	6.39	4.16	0.04	0.14	0.06	0.04	0.14	0.16	0.06	0.14	0	0.04	0	0	0.04	0.07	0.17	0.19	0.09	XP_022821406.1(cytochrome P450 4g1-like [Spodoptera litura])
TRINITY_DN58710_c2_g1	0.128921	-2.95544	2.8e-13	9.93e-11	yes	down	3.92	0.785882	4.78	3.86	3.4	2.93	4.98	3.57	0.84	0.47	0.7	0.78	0.68	0.84	0.55	0.33	1.19	0.93	1.24	0.96	0.88	0.92	0.64	0.84	0.57	XP_021192992.1(pituitary homeobox homolog Ptx1 [Helicoverpa armigera])
TRINITY_DN60081_c0_g1	0.292099	-1.77547	2.81e-13	9.93e-11	yes	down	843.99	356.728	895.49	808.12	837.12	834.07	876.1	813.04	380.97	378.43	391.67	433.39	431.49	397.56	187.73	229.29	434.34	399.58	439.96	400.4	408.02	431.33	223.81	256.33	240.07	XP_021182666.1(V-type proton ATPase 16 kDa proteolipid subunit [Helicoverpa armigera])
TRINITY_DN63605_c1_g3	0.215999	-2.21091	2.83e-13	9.97e-11	yes	down	69.6283	21.8306	67.66	68.25	51.07	89.24	78.17	63.38	18.4	18.34	18.35	15.16	17.76	17.81	17.31	23.27	32.09	24.31	29.23	19.9	16.75	20.17	27.75	17.82	36.7	APD13884.1(putative carboxylesterase CXE30 [Spodoptera litura])
TRINITY_DN48777_c0_g1	0.00771322	-7.01845	2.91e-13	1.03e-10	yes	down	6.935	0.0735294	7.28	6.24	7.36	10.69	5.04	5	0.04	0.08	0	0	0.09	0	0.08	0.08	0.22	0	0.03	0.42	0	0.06	0.09	0	0.06	XP_022836124.1(collagenase-like [Spodoptera litura])
TRINITY_DN59367_c0_g1	0.262888	-1.92748	3.08e-13	1.08e-10	yes	down	194.485	74.2765	191.5	169.38	185.16	200.67	209.17	211.03	80.78	80.16	88.62	86.42	81.12	76.98	31.53	58.52	90.03	88.29	91.9	78.68	75.54	75.15	56.5	62.24	60.24	XP_021184096.1(V-type proton ATPase subunit d [Helicoverpa armigera])
TRINITY_DN59719_c2_g2	0.00965025	-6.69522	3.14e-13	1.1e-10	yes	down	2.895	0.0347059	3.16	2.58	4.11	3.18	1.31	3.03	0	0	0	0	0	0	0	0	0	0	0	0	0	0	0	0	0.59	None
TRINITY_DN60630_c0_g2	0.0742741	-3.751	3.19e-13	1.12e-10	yes	down	42.93	4.50765	35.74	44.52	42.91	55.2	25.71	53.5	5.32	3.95	5.1	1.54	1.39	1.87	11.94	1.84	7.14	4.65	5.3	2.98	2.73	4.05	6.48	4.96	5.39	XP_022817724.1(elongation of very long chain fatty acids protein 7-like [Spodoptera litura])
TRINITY_DN60252_c0_g1	0.120714	-3.05034	3.27e-13	1.15e-10	yes	down	27.4017	4.68412	34.76	29.01	19.88	38.58	21.33	20.85	3.29	2.75	3.48	5.45	6.61	6.66	4.42	5.97	3.28	2.6	3.28	5.6	4.72	4.76	5.07	5.26	6.43	XP_021183723.1(uncharacterized protein CG3556 isoform X1 [Helicoverpa armigera])
TRINITY_DN59301_c0_g1	0.00454057	-7.78291	3.46e-13	1.21e-10	yes	down	8.355	0.0505882	6.41	20.22	13.38	2.46	5.38	2.28	0	0.08	0	0	0	0	0	0	0.17	0.09	0.52	0	0	0	0	0	0	XP_022835059.1(vitellogenin-like [Spodoptera litura])
TRINITY_DN63049_c0_g1	0.0360862	-4.79241	3.46e-13	1.21e-10	yes	down	1.86833	0.0952941	2.69	0.9	1.09	2.14	1.86	2.53	0.02	0.08	0.08	0.04	0.04	0.09	0.06	0.15	0.07	0.03	0.03	0.1	0.09	0.06	0.25	0.15	0.28	XP_022828570.1(protein stum [Spodoptera litura])
TRINITY_DN60291_c3_g1	0.00541408	-7.52907	3.47e-13	1.21e-10	yes	down	300.268	1.87529	330.05	252.84	87.09	261.23	420.97	449.43	0	3.48	0	0	0	0	9.28	16.18	0	0	0	0	0	0	0	0	2.94	None
TRINITY_DN60826_c5_g5	0.139296	-2.84377	3.52e-13	1.22e-10	yes	down	96.2167	19.0747	104.59	129.31	57.66	80.84	113.74	91.16	16.71	14.28	13.86	17.28	18.78	14.36	25.72	19.03	19.07	17.34	18.63	17.93	17.86	17.54	21.21	34.65	20.02	XP_022829234.1(tetraspanin-2A [Spodoptera litura])
TRINITY_DN61602_c1_g3	0.0129881	-6.26667	3.53e-13	1.23e-10	yes	down	0.653333	0.00647059	1.08	0.58	0.62	0.43	0.56	0.65	0	0	0.11	0	0	0	0	0	0	0	0	0	0	0	0	0	0	None
TRINITY_DN54716_c1_g1	13.2739	3.73052	3.65e-13	1.26e-10	yes	up	2.01833	38.2841	2.41	2.07	2.79	1.24	2.3	1.3	37.78	33.06	56.06	40.62	41.1	48.05	19.66	31.96	43.68	47.81	52.22	40.48	48.28	39.69	25.71	30.35	14.32	ASO98028.1(cytochrome p450 CYP304F1 [Spodoptera exigua])
TRINITY_DN60808_c1_g1	0.15901	-2.65281	3.91e-13	1.35e-10	yes	down	93.6733	22.0565	110.56	108.71	73.41	86.95	99.45	82.96	21.39	20.87	19.53	24.51	25.79	27.09	6.5	12.79	24.54	25.95	24.9	29.74	24.49	32.58	15.75	22.8	15.74	XP_022813848.1(myosin-IB isoform X1 [Spodoptera litura])
TRINITY_DN58798_c2_g1	0.0104481	-6.58061	3.99e-13	1.38e-10	yes	down	1617.01	25.1859	1815.64	1314.07	1824.33	1456.57	2042.62	1248.85	27.16	17.56	19.15	38.99	42.81	38.89	5.41	1.12	39.02	30.94	44.59	38.7	36.21	42.69	0.87	2.85	1.2	XP_022816173.1(larval cuticle protein LCP-30-like [Spodoptera litura])
TRINITY_DN62146_c0_g1	0.0758348	-3.721	4e-13	1.38e-10	yes	down	110.8	10.9241	116.69	90.86	105.66	107.75	153.69	90.15	18.23	30.2	24.84	4.49	3.32	3.98	6.97	16.85	9.4	11.57	11.77	4.44	3.02	3.16	10.37	13.14	9.96	XP_022826874.1(cholinesterase 1-like [Spodoptera litura])
TRINITY_DN52262_c0_g1	0.00535766	-7.54418	4.1e-13	1.41e-10	yes	down	4.52833	0.03	4.92	4.64	5.92	3.8	2.34	5.55	0.19	0	0.03	0	0	0	0.03	0	0	0	0	0	0	0	0.06	0	0.2	XP_022823641.1(carboxypeptidase B-like [Spodoptera litura])
TRINITY_DN61782_c1_g1	0.110816	-3.17377	4.17e-13	1.43e-10	yes	down	208.657	31.1859	214.47	120.58	191.08	194.08	286.38	245.35	40.89	8.89	20.36	25.43	37.25	58	30.11	64.45	18.76	7.69	21.77	27.9	53.68	11.12	43.96	30.18	29.72	XP_022826744.1(dopamine N-acetyltransferase-like [Spodoptera litura])
TRINITY_DN44290_c0_g1	0.0100866	-6.63142	4.28e-13	1.47e-10	yes	down	2.945	0.0382353	3.05	4.11	1.57	3.44	3.88	1.62	0	0.13	0	0	0	0	0.06	0	0	0.19	0.06	0.15	0	0	0	0.06	0	None
TRINITY_DN56224_c0_g1	0.00438994	-7.83158	4.34e-13	1.49e-10	yes	down	5.855	0.0347059	4.59	10.69	2.24	6.7	4.81	6.1	0	0.06	0	0	0.17	0.03	0	0.03	0	0	0	0.27	0	0	0.03	0	0	XP_022814428.1(phospholipase A1-like [Spodoptera litura])
TRINITY_DN61076_c0_g2	0.0319752	-4.9669	4.42e-13	1.51e-10	yes	down	13.2	0.598235	12.43	11.42	6.31	10.35	20.36	18.33	0.19	0.7	0.43	1.05	1.14	0.87	0.26	0.39	1.08	1.01	0.82	1.16	0.55	0.22	0.11	0.08	0.11	XP_022816339.1(cuticle protein 3-like [Spodoptera litura])
TRINITY_DN41206_c0_g2	0.0239758	-5.38228	4.43e-13	1.51e-10	yes	down	27.5383	0.994706	34.16	61.71	6.38	15.34	17.98	29.66	0.8	1.3	1.26	1.93	1.55	1.56	0.15	0.19	1.42	1.28	1.4	1.2	1.31	1.1	0.16	0.22	0.08	XP_022830560.1(myrosinase 1-like [Spodoptera litura])
TRINITY_DN62664_c4_g3	0.00223903	-8.80291	4.67e-13	1.59e-10	yes	down	84.1117	0.159412	128.59	109.84	96.18	82.1	45.63	42.33	0.04	0.02	0.02	0	0.02	0.03	0.59	0.57	0	0.1	0.04	0	0	0.03	0.74	0.34	0.17	XP_022837525.1(serpin-Z4-like [Spodoptera litura])
TRINITY_DN60709_c2_g7	0.00994114	-6.65237	4.71e-13	1.6e-10	yes	down	12.7767	0.187059	8.18	12.31	12.9	19.61	10.6	13.06	0.33	0.49	0.12	0	0.06	0.15	0.06	0	0.18	0.71	0.69	0.1	0.17	0	0	0.12	0	XP_022816385.1(elongation of very long chain fatty acids protein AAEL008004-like [Spodoptera litura])
TRINITY_DN162737_c0_g1	0.0107104	-6.54484	4.71e-13	1.6e-10	yes	down	1.6	0.0182353	1	0.41	1.51	1.18	3.89	1.61	0	0	0	0	0.04	0	0	0.06	0	0	0	0.03	0.04	0	0.07	0.07	0	None
TRINITY_DN62148_c0_g2	0.180168	-2.47258	4.73e-13	1.6e-10	yes	down	48.09	13.5553	40.18	40.35	33.22	57.18	63.49	54.12	10.86	10.76	9.75	15.74	16.31	17.32	6.24	9.91	19.35	15.63	11.3	17.07	16.71	19.88	14.39	11.43	7.79	KOB76123.1(Inwardly rectifying k+ channel [Operophtera brumata])
TRINITY_DN63936_c2_g1	0.0147957	-6.07868	4.79e-13	1.62e-10	yes	down	787.748	35.9894	957.57	1399.18	867.63	455.65	489.8	556.66	21.01	24.3	39.62	70.26	77.62	97.99	7.57	1.88	45.72	22.87	18.69	61.65	47.45	65.92	0.46	0.41	8.4	XP_022814128.1(alpha-amylase 2-like [Spodoptera litura])
TRINITY_DN85908_c0_g1	0.00120148	-9.70097	4.8e-13	1.62e-10	yes	down	18.2783	0	19.66	17.65	22.13	19.44	15.9	14.89	0	0	0	0	0	0	0	0	0	0	0	0	0	0	0	0	0	XP_022829288.1(dentin sialophosphoprotein-like [Spodoptera litura])
TRINITY_DN61864_c0_g1	0.0896137	-3.48014	4.84e-13	1.63e-10	yes	down	16.6567	2.51059	16.69	16.11	15.12	17.02	18.1	16.9	2.38	4.05	2.48	0.88	1.59	1.19	0.97	7.13	2.32	3.21	2.22	0.91	2.06	1.03	1.9	5.76	2.6	XP_022818362.1(transient receptor potential channel pyrexia-like isoform X1 [Spodoptera litura])
TRINITY_DN45285_c0_g1	0.170641	-2.55096	4.98e-13	1.68e-10	yes	down	63.3183	15.8641	63.24	56.63	74.12	60.39	68.05	57.48	22.81	21.57	23.01	12.18	12.34	12.58	13.48	8.8	23.1	21.72	23.13	12.67	12.49	13.83	10.8	14.03	11.15	XP_022832318.1(3-hydroxyacyl-CoA dehydrogenase type-2 [Spodoptera litura])
TRINITY_DN56477_c0_g1	0.0456171	-4.45428	5.59e-13	1.88e-10	yes	down	5.98667	0.396471	4.11	4.7	5.03	7.3	8.89	5.89	0.44	0.7	0.64	0.59	0.11	0.05	0.11	0.15	0.72	0.31	0.38	0.22	0.36	0.25	0.47	0.96	0.28	XP_022830327.1(three prime repair exonuclease 2-like [Spodoptera litura])
TRINITY_DN58662_c0_g1	0.0132851	-6.23405	5.63e-13	1.89e-10	yes	down	0.836667	0.00941177	0.78	0.93	0.58	1.44	0.63	0.66	0	0	0.04	0.04	0	0	0	0	0.04	0.02	0	0.02	0	0	0	0	0	XP_022821386.1(esterase B1-like [Spodoptera litura])
TRINITY_DN61314_c10_g2	0.0151145	-6.04793	5.89e-13	1.98e-10	yes	down	1.82	0.0182353	1.71	1.56	2.42	0.55	2.9	1.78	0	0	0.17	0	0	0.14	0	0	0	0	0	0	0	0	0	0	0	None
TRINITY_DN62895_c2_g2	0.012784	-6.28952	5.95e-13	1.99e-10	yes	down	0.286667	0.00411765	0.4	0.19	0.6	0.14	0.19	0.2	0	0.03	0	0	0	0	0	0	0.02	0.02	0	0	0	0	0	0	0	None
TRINITY_DN147786_c0_g1	0.0105528	-6.56623	6e-13	2e-10	yes	down	6.49	0.0317647	5.35	0.51	0.94	8.86	10.97	12.31	0	0	0	0	0	0	0	0	0.54	0	0	0	0	0	0	0	0	None
TRINITY_DN50679_c0_g1	0.0165258	-5.91914	6.08e-13	2.03e-10	yes	down	10.2017	0.205294	4.08	12.35	12.34	17.22	6.98	8.24	0.34	0	0	0.15	0.15	0.54	0.69	0	0.25	0.2	0.33	0.24	0.15	0.18	0	0.18	0.09	XP_022827033.1(uncharacterized protein LOC111356782 [Spodoptera litura])
TRINITY_DN60925_c3_g1	17.7166	4.14703	6.19e-13	2.06e-10	yes	up	11.985	83.4806	17.59	7.48	17.44	6.39	15.86	7.15	95.35	81.26	92.31	110.3	112.32	99.63	59.23	38.43	76.22	95	90.38	108.8	120.63	87.45	61.21	39.4	51.25	XP_022829275.1(uncharacterized protein LOC111358385 [Spodoptera litura])
TRINITY_DN60734_c3_g2	0.0185562	-5.75196	6.54e-13	2.17e-10	yes	down	3.55667	0.232941	4.43	3.04	1.47	2.73	4.35	5.32	0.53	0	0.77	0.82	0.39	0.34	0	0	0	0.44	0.1	0	0	0.09	0.39	0	0.09	XP_022830966.1(uncharacterized protein LOC111359604 [Spodoptera litura])
TRINITY_DN14799_c0_g1	0.0160626	-5.96015	6.59e-13	2.19e-10	yes	down	2.33167	0.0176471	1.43	2.49	1.78	3.89	2.84	1.56	0	0	0	0	0	0	0	0	0	0	0	0	0	0	0	0.3	0	None
TRINITY_DN51657_c0_g1	0.146683	-2.76922	6.62e-13	2.2e-10	yes	down	15.385	3.23059	11.92	9.68	20.47	18.15	16.31	15.78	4.82	4.28	3.59	3.13	2.68	2.79	2.88	2.49	4.43	3.46	4.09	2.48	3.31	2.44	2.94	2.94	2.17	XP_022837585.1(cytochrome c oxidase assembly factor 7 homolog [Spodoptera litura])
TRINITY_DN56389_c5_g2	0.00550559	-7.50489	6.66e-13	2.21e-10	yes	down	23.3667	0.171765	15.56	40.02	47.09	11.23	10.6	15.7	0.06	0.21	0.05	0	0	0	0.43	0.22	0.15	0	0.21	0	0.05	0	0.54	0.45	0.55	XP_022831368.1(protein D2-like [Spodoptera litura])
TRINITY_DN57475_c0_g3	0.113203	-3.14302	6.89e-13	2.28e-10	yes	down	13.5417	2.14412	11.79	8.4	14.63	16.61	18.39	11.43	1.36	1.3	1.46	3.29	1.99	1.88	1.38	2.09	3.42	2.26	2.46	1.89	3.57	3.11	1.4	1.16	2.43	XP_022819142.1(serine hydrolase-like protein 2 [Spodoptera litura])
TRINITY_DN60765_c2_g1	0.00127197	-9.61872	7.34e-13	2.42e-10	yes	down	4.79667	0	4.79	4.55	2.82	5.33	7.5	3.79	0	0	0	0	0	0	0	0	0	0	0	0	0	0	0	0	0	None
TRINITY_DN19919_c0_g1	0.20377	-2.29499	7.65e-13	2.52e-10	yes	down	23.0583	6.83059	26.15	21.97	17.49	24.11	28.92	19.71	6.46	7.05	7.38	5.41	5.13	6.97	3.21	7.51	7.77	7.23	7.23	6.74	5.99	7.96	7.92	8.07	8.09	XP_022821152.1(MARVEL domain-containing protein 1-like [Spodoptera litura])
TRINITY_DN56755_c0_g2	0.193629	-2.36863	7.7e-13	2.53e-10	yes	down	76.05	21.3524	75.77	62.06	115.2	79.65	72.81	50.81	27.49	27.97	25.92	17.86	18.49	18.53	18.97	16.09	24.43	25.96	29.77	20.76	21.55	16.64	17.18	15.41	19.97	XP_022819819.1(fatty acid-binding protein, liver-like [Spodoptera litura])
TRINITY_DN50339_c1_g1	0.00611565	-7.35328	7.71e-13	2.53e-10	yes	down	50.8183	0.418235	18.26	11.85	186.34	39.39	24.22	24.85	0.18	0	0.5	0	0	0.28	0.47	1.99	0.68	0.74	0.36	0.58	1	0.33	0	0	0	None
TRINITY_DN43549_c0_g1	0.00576371	-7.43879	7.77e-13	2.55e-10	yes	down	16.9767	0.110588	13.1	14.58	7.04	12.34	36.81	17.99	0	0	0	0	1.25	0	0	0	0.22	0	0	0	0	0	0	0	0.41	XP_022815942.1(cuticle protein 7-like [Spodoptera litura])
TRINITY_DN41054_c0_g1	0.0533272	-4.22898	8.29e-13	2.71e-10	yes	down	23.1617	1.66882	19.25	19.35	21.4	25.74	30.27	22.96	1.04	0.64	0.45	1.75	2.15	0.91	2.96	2.02	1.27	1	1.15	1.36	2.36	1.76	0.98	4.87	1.7	XP_022821949.1(protein rolling stone-like [Spodoptera litura])
TRINITY_DN51708_c0_g1	0.00899682	-6.79637	8.75e-13	2.86e-10	yes	down	17.0033	0.203529	13.55	6.87	8.99	10.52	21.93	40.16	0.08	0.16	0	0	0	0	0.43	0.2	0	0.58	0.08	0.07	0.45	0.15	0.44	0.15	0.67	XP_021185703.1(uncharacterized protein LOC110372977 [Helicoverpa armigera])
TRINITY_DN53811_c0_g2	0.00150728	-9.37383	8.82e-13	2.88e-10	yes	down	9.30167	0	6.62	9.61	10.67	9.97	10.08	8.86	0	0	0	0	0	0	0	0	0	0	0	0	0	0	0	0	0	None
TRINITY_DN55079_c0_g1	0.064424	-3.95626	9.11e-13	2.97e-10	yes	down	4.945	0.444118	4.76	4.78	2.84	3.8	6.95	6.54	0.2	0.35	0.14	0.49	0.62	0.77	0.53	0.16	0.3	0.41	0.81	0.38	0.54	0.37	0.35	0.75	0.38	None
TRINITY_DN61510_c0_g1	0.198961	-2.32944	9.46e-13	3.08e-10	yes	down	146.487	40.52	173.78	127.9	116.71	269.98	82.71	107.84	48.25	43.65	54.14	33.8	35.23	38.57	19.16	38.21	51	56.64	51.45	27.94	36.96	30.73	25.72	35.12	62.27	XP_022814265.1(acyl-CoA Delta(11) desaturase-like [Spodoptera litura])
TRINITY_DN60005_c0_g3	0.159844	-2.64526	1.03e-12	3.36e-10	yes	down	85.3333	20.1347	108.89	84.84	64.97	81.58	90.96	80.76	17.45	19.21	20.87	22.72	22.82	23.54	4.16	12.22	23.29	22.97	24.98	24.86	22.76	29.38	14.03	22.07	14.96	XP_022813848.1(myosin-IB isoform X1 [Spodoptera litura])
TRINITY_DN58434_c0_g1	0.0015711	-9.31401	1.04e-12	3.37e-10	yes	down	75.8883	0	73.15	76.42	103.32	86.06	58.19	58.19	0	0	0	0	0	0	0	0	0	0	0	0	0	0	0	0	0	WP_059362666.1(hypothetical protein [Lechevalieria aerocolonigenes])
TRINITY_DN63561_c0_g1	0.0894169	-3.48331	1.04e-12	3.37e-10	yes	down	5.48667	25.6447	4.84	2.39	5	3.96	8.59	8.14	50.43	168.49	131.18	0.92	1.18	1.21	0.15	0.38	10.44	61.45	5.79	1.05	1.16	0.77	0.37	0.39	0.6	XP_022819179.1(uncharacterized protein LOC111351480 isoform X1 [Spodoptera litura])
TRINITY_DN59147_c1_g2	0.105011	-3.25139	1.04e-12	3.37e-10	yes	down	9.43167	1.39059	8.26	8.11	12.34	8.12	11.57	8.19	0.81	0.68	1.07	1.93	1.42	1.8	0.93	1.31	1.22	1.09	1.3	1.79	1.85	2.07	1.73	1.45	1.19	PCG73912.1(hypothetical protein B5V51_14142 [Heliothis virescens])
TRINITY_DN56385_c0_g3	0.0532457	-4.23119	1.09e-12	3.53e-10	yes	down	62.7267	30.4271	35.16	63.02	21.84	113.25	109.62	33.47	81.09	102.62	46.31	66.36	35.12	0.56	12.95	23.43	13.44	13.64	12.51	21.82	50.79	11.19	13.43	0.81	11.19	None
TRINITY_DN54494_c0_g1	0.00968452	-6.6901	1.12e-12	3.62e-10	yes	down	2.34167	0.0152941	0.52	0.49	1.46	0.99	8.95	1.64	0	0	0	0	0.13	0	0	0	0	0	0	0	0	0.13	0	0	0	None
TRINITY_DN57881_c1_g1	17.7471	4.14951	1.18e-12	3.81e-10	yes	up	1.10167	28.3641	0.92	1.42	1.49	0.57	0.78	1.43	23.06	39.54	25.68	47.45	38.2	28.9	11.15	21.19	36.24	30.75	26.19	28.34	41.32	32.19	13.72	16.74	21.53	XP_022816751.1(uncharacterized protein LOC111349752 [Spodoptera litura])
TRINITY_DN57101_c1_g2	0.00836261	-6.90183	1.22e-12	3.93e-10	yes	down	29.815	0.332941	26.95	31.51	19.83	37.79	34.76	28.05	0.16	0.1	0	0.62	1.11	0.25	0.07	1.34	0.17	0.14	0.1	0.15	0.38	0.93	0.07	0	0.07	PCG67373.1(hypothetical protein B5V51_6477, partial [Heliothis virescens])
TRINITY_DN61017_c10_g3	0.118178	-3.08097	1.24e-12	3.98e-10	yes	down	6035.37	994.285	5583.95	5792.07	7212.06	5457.53	5148.68	7017.94	709.68	568.01	715.94	1591.58	1739.51	1750.12	903.48	499.41	898.31	815.31	910.09	1456.64	1158.16	1733.67	421.11	550.29	481.54	AHA43765.1(actin [Chrysopa septempunctata])
TRINITY_DN56850_c5_g2	0.183669	-2.44482	1.32e-12	4.24e-10	yes	down	102.048	26.8506	86.96	114.97	105.39	117.72	94.15	93.1	22.72	18.9	22.89	39.6	36.31	35.49	11.57	34.37	27.17	21.7	21.06	30.09	27.34	28.67	28.34	35.58	14.66	XP_022820135.1(23 kDa integral membrane protein-like [Spodoptera litura])
TRINITY_DN9080_c0_g1	0.0175889	-5.82919	1.33e-12	4.25e-10	yes	down	2.25833	0.0476471	2.57	2.61	1.96	2.08	2.54	1.79	0.11	0.1	0	0	0	0	0	0	0.3	0.11	0	0.09	0.1	0	0	0	0	None
TRINITY_DN63410_c0_g1	0.173017	-2.53101	1.41e-12	4.51e-10	yes	down	82.6883	21.3547	91.99	61.94	80.48	93.5	91.9	76.32	12.98	11.35	12.15	22.02	24.25	30.26	5.72	23.65	25.04	15.04	19.48	25.34	22.6	26.84	24.21	32.44	29.66	XP_022824038.1(uncharacterized protein LOC111354734 [Spodoptera litura])
TRINITY_DN93733_c0_g1	0.00175128	-9.15737	1.41e-12	4.51e-10	yes	down	10.0033	0	11.48	8.89	12.02	6.88	11.46	9.29	0	0	0	0	0	0	0	0	0	0	0	0	0	0	0	0	0	None
TRINITY_DN53445_c0_g1	0.0166759	-5.90609	1.45e-12	4.62e-10	yes	down	3.23	0.0717647	4.9	2.95	3.65	2.02	2.86	3	0	0.04	0.08	0.11	0.04	0.13	0	0.1	0.04	0	0	0.06	0.07	0	0.33	0.07	0.15	PCG75187.1(hypothetical protein B5V51_12087 [Heliothis virescens])
TRINITY_DN51558_c0_g1	0.110203	-3.18176	1.62e-12	5.16e-10	yes	down	94.165	14.35	100.76	116.4	89.49	79.37	98.25	80.72	6.29	7.1	8.55	16.13	17.19	12.06	24.81	16.88	11.8	8.52	8.23	15.98	14.44	17.01	16.68	23.84	18.44	AFK11562.1(beta-actin [Callorhinchus milii])
TRINITY_DN53045_c0_g1	0.022653	-5.46416	1.78e-12	5.65e-10	yes	down	5.74833	0.194118	5.97	4.2	4.2	4.73	9.69	5.7	0.58	0.56	0.2	0.18	0.13	0.05	0.03	0.28	0.36	0.45	0.17	0.02	0	0.05	0.05	0.14	0.05	XP_022817114.1(guanine nucleotide-binding protein G(f) subunit alpha-like [Spodoptera litura])
TRINITY_DN44382_c0_g1	0.0150202	-6.05695	1.79e-12	5.67e-10	yes	down	1.60333	0.0270588	1.07	2.08	1.73	1.92	0.87	1.95	0	0	0	0	0	0	0	0.06	0	0.21	0	0	0.06	0	0	0.07	0.06	XP_022836510.1(uncharacterized protein LOC111363874, partial [Spodoptera litura])
TRINITY_DN51633_c0_g1	0.213405	-2.22834	1.83e-12	5.81e-10	yes	down	229.105	69.8953	196.78	244.46	155.69	173.67	330.72	273.31	72.94	88.7	75.8	81.69	95.01	82.19	56.71	53.79	57.16	56.36	60.46	64.53	69.48	64.79	56.63	53.38	98.6	None
TRINITY_DN54052_c0_g1	0.0121836	-6.35891	1.85e-12	5.84e-10	yes	down	0.596667	0.00588235	0.61	0.59	1	0.19	0.68	0.51	0	0	0	0	0	0	0	0	0	0	0	0	0	0	0	0.1	0	XP_004922399.1(uncharacterized protein LOC101735446 [Bombyx mori])
TRINITY_DN57450_c0_g1	0.056732	-4.13969	1.89e-12	5.96e-10	yes	down	12.4	0.972941	11.06	11.74	10.1	15.81	13.58	12.11	0.48	0.58	0.34	1.72	1.57	1.64	0.44	0.96	0.3	0.34	0.41	2.23	1.47	1.62	0.61	0.64	1.19	XP_022828278.1(organic cation transporter protein-like [Spodoptera litura])
TRINITY_DN53617_c0_g1	0.195778	-2.35271	1.89e-12	5.97e-10	yes	down	215.908	59.2559	172.15	148.72	185.22	223.62	226.34	339.4	39.95	36.55	45.52	87.92	74.43	66.58	49.81	60.98	61.04	50.76	66.23	82.75	52.5	77.78	52.21	53.72	48.62	XP_021182292.1(muscle-specific protein 20-like [Helicoverpa armigera])
TRINITY_DN24829_c0_g1	0.00848729	-6.88048	1.93e-12	6.07e-10	yes	down	0.951667	0.00882353	1.06	0.98	0.69	0.64	1.57	0.77	0	0	0	0	0	0.07	0	0.06	0	0	0	0	0	0	0	0.02	0	None
TRINITY_DN57318_c3_g1	0.268516	-1.89692	1.96e-12	6.17e-10	yes	down	175.818	68.2535	157.52	175.64	205.94	193.48	150.73	171.6	93.85	92.02	90.89	61.31	53.94	56.16	79	48.03	82.12	78.6	82.85	53.67	72.51	52.9	55.83	48.27	58.36	XP_022830659.1(probable enoyl-CoA hydratase, mitochondrial [Spodoptera litura])
TRINITY_DN62907_c2_g2	0.192621	-2.37616	2.01e-12	6.3e-10	yes	down	581.428	158.62	513.22	706.53	525.07	424.87	793.4	525.48	138.56	153.97	143.22	128.72	147.88	145.66	280.36	67.47	183.38	180.79	185.37	121.83	127.14	132.65	209.14	209.27	141.13	XP_022825873.1(SPARC [Spodoptera litura])
TRINITY_DN53491_c0_g1	0.0276854	-5.17473	2.14e-12	6.71e-10	yes	down	20.31	0.79	22.15	14.56	26.43	27.78	16.45	14.49	0.81	0.78	0.42	0	0.24	0.65	1.31	2.01	0.67	0.69	1.16	0.11	0.25	0.28	1.19	1.41	1.45	None
TRINITY_DN57557_c5_g1	0.00194968	-9.00255	2.17e-12	6.77e-10	yes	down	90.405	0.225882	91.52	127.07	90.23	32.99	96.01	104.61	0.03	0.08	0.06	0.04	0.02	0	0.66	1.87	0.02	0	0.11	0.05	0	0.02	0.4	0.08	0.4	XP_022813839.1(actin cytoskeleton-regulatory complex protein PAN1-like [Spodoptera litura])
TRINITY_DN43369_c0_g2	0.00763336	-7.03347	2.21e-12	6.9e-10	yes	down	3.71667	0.0317647	3.9	3.23	4.24	3.21	3.99	3.73	0	0	0	0.04	0	0	0.2	0.18	0	0	0	0	0	0	0	0.04	0.08	None
TRINITY_DN51850_c1_g1	0.00769597	-7.02168	2.24e-12	6.98e-10	yes	down	52.3817	0.547647	45.01	43.4	52.03	47.36	71.62	54.87	0	0	0.12	0.22	0.16	0.09	0.97	2.01	0.16	0.13	0.18	0.2	0.5	0.15	1.61	0.46	2.35	XP_022830919.1(fatty acid-binding protein, liver-like [Spodoptera litura])
TRINITY_DN61300_c1_g1	9.91559	3.3097	2.26e-12	7.05e-10	yes	up	3.06833	40.7359	3.83	1.72	3.04	2.93	4.5	2.39	31.44	30.39	37.73	35.47	34.78	42.41	11.59	51.02	44.07	37.01	43.23	42.27	36.91	56.09	53.14	56.6	48.36	XP_022828242.1(kelch-like protein 5 isoform X1 [Spodoptera litura])
TRINITY_DN87298_c0_g1	0.016578	-5.91458	2.29e-12	7.11e-10	yes	down	4.83167	0.0841176	4.76	3.72	4.68	4.91	3.7	7.22	0	0	0	0	0.24	0	0	0	0.5	0	0	0.21	0	0.48	0	0	0	None
TRINITY_DN59920_c1_g5	0.0140304	-6.1553	2.3e-12	7.15e-10	yes	down	0.575	0.00823529	0.94	0.16	0.31	0.21	1.12	0.71	0	0	0	0.03	0	0	0	0	0.03	0	0	0.05	0.03	0	0	0	0	None
TRINITY_DN61629_c0_g1	0.0741008	-3.75437	2.37e-12	7.33e-10	yes	down	20.39	2.32	21.69	12.71	30.33	20.43	18.2	18.98	1.49	2.08	2.5	2.36	3.19	3.64	0.96	0.59	4.42	3.49	4.87	2.18	3.18	2.6	0.41	0.65	0.83	XP_022827201.1(lactase-phlorizin hydrolase-like [Spodoptera litura])
TRINITY_DN61319_c0_g1	21.0948	4.39881	2.4e-12	7.42e-10	yes	up	1.57667	24.1012	2.38	1.88	1.99	0.45	1.56	1.2	16.56	18.15	16.59	19.98	20.04	31.41	2.78	26.02	24.74	21.62	24.27	28.53	26.24	32.76	36.99	32.22	30.82	XP_022827204.1(mushroom body large-type Kenyon cell-specific protein 1 [Spodoptera litura])
TRINITY_DN51742_c0_g1	0.0110787	-6.49607	2.44e-12	7.55e-10	yes	down	2.79667	0.0376471	2.15	2.68	4.06	2.94	2.75	2.2	0.12	0	0	0	0	0	0.05	0.09	0	0	0	0	0	0	0	0.11	0.27	XP_022823598.1(uncharacterized protein LOC111354388 [Spodoptera litura])
TRINITY_DN46559_c0_g1	0.0183272	-5.76987	2.51e-12	7.73e-10	yes	down	1.31333	0.0123529	0.9	1.42	2.43	1.41	0.71	1.01	0.21	0	0	0	0	0	0	0	0	0	0	0	0	0	0	0	0	None
TRINITY_DN63640_c1_g3	0.0211493	-5.56324	2.51e-12	7.75e-10	yes	down	2.59667	0.0911765	2.84	3.2	1.47	0.75	3.31	4.01	0	0.02	0.02	0.07	0.06	0.08	0.06	0.35	0.06	0.04	0.03	0.11	0.11	0.1	0.13	0.19	0.12	XP_022814717.1(brachyurin-like [Spodoptera litura])
TRINITY_DN62533_c1_g1	0.081092	-3.6243	2.54e-12	7.82e-10	yes	down	4.04833	0.509412	5.88	2.71	3.5	2.71	5.66	3.83	0.43	0.58	0.66	0.73	0.23	0.31	0.26	0.72	0.81	0.26	0.27	0.31	0.39	0.21	0.28	0.94	1.27	XP_022822172.1(adenylate cyclase type 2-like isoform X1 [Spodoptera litura])
TRINITY_DN44580_c0_g1	0.0175632	-5.8313	2.56e-12	7.87e-10	yes	down	7.94	0.0652941	9.3	12.63	3.92	5.41	5.47	10.91	0	0	0	0	1.11	0	0	0	0	0	0	0	0	0	0	0	0	None
TRINITY_DN62146_c0_g4	0.0120784	-6.37143	2.67e-12	8.18e-10	yes	down	1.41667	0.0217647	2.08	1.44	0.75	1.16	2.32	0.75	0	0.05	0	0	0	0	0.04	0.08	0.1	0.03	0	0	0	0	0	0.02	0.05	XP_022825988.1(uncharacterized protein LOC111356021 [Spodoptera litura])
TRINITY_DN59885_c1_g3	0.06223	-4.00625	2.71e-12	8.3e-10	yes	down	45.7667	3.68588	35.76	67.88	23.43	51.63	50.06	45.84	1.77	1.14	2.07	2.73	2.68	2.53	5.12	7.7	2.2	1.17	1.66	3.53	1.97	2.53	6.11	8.08	9.67	XP_022820255.1(23 kDa integral membrane protein-like [Spodoptera litura])
TRINITY_DN58085_c0_g2	0.00171494	-9.18762	2.73e-12	8.36e-10	yes	down	25.19	0	37.78	27.21	27.23	14.03	31.17	13.72	0	0	0	0	0	0	0	0	0	0	0	0	0	0	0	0	0	None
TRINITY_DN57153_c2_g1	0.0184903	-5.75708	2.76e-12	8.43e-10	yes	down	4.79333	0.0376471	4.08	3.31	5.53	2.29	8.04	5.51	0	0	0	0	0	0	0	0	0	0	0	0	0	0	0	0	0.64	XP_013177579.1(PREDICTED: uncharacterized protein LOC106125039 [Papilio xuthus])
TRINITY_DN18188_c0_g1	0.0152405	-6.03594	2.76e-12	8.43e-10	yes	down	0.876667	0.0129412	1.08	0.39	0.79	1.21	0.91	0.88	0	0	0	0	0	0	0	0.12	0.05	0	0	0	0	0.05	0	0	0	None
TRINITY_DN61266_c2_g1	0.14423	-2.79356	2.8e-12	8.54e-10	yes	down	25.4083	5.08824	25.34	17.63	20.89	29.85	33.73	25.01	3.98	3.96	3.56	3.72	3.73	3.4	8.11	8.52	4.97	3.75	4.13	4.12	4.41	3.27	7.08	8.13	7.66	XP_022832964.1(venom carboxylesterase-6-like [Spodoptera litura])
TRINITY_DN50029_c0_g2	0.0846921	-3.56163	2.83e-12	8.6e-10	yes	down	92.7383	10.8818	81.23	110.75	71.03	81.99	115.66	95.77	4.64	4.5	4.54	12.23	12.47	8.73	12.62	18.6	5.93	5.92	5.04	8.09	9.29	9.36	15.93	32.12	14.98	XP_021184237.1(LOW QUALITY PROTEIN: uncharacterized protein LOC110372047 [Helicoverpa armigera])
TRINITY_DN58955_c2_g3	0.00296774	-8.39642	2.89e-12	8.79e-10	yes	down	13.8267	0.0305882	33.14	16.79	0	27.43	5.6	0	0	0	0	0	0	0	0	0	0	0	0	0	0	0	0.52	0	0	None
TRINITY_DN51525_c0_g1	0.0126986	-6.29918	2.92e-12	8.85e-10	yes	down	8.24167	0.407647	6.61	16.49	3.03	9.66	6.95	6.71	0	0	0	0.27	0	0	0	0	0	0	0	1.18	0	0	2.78	0	2.7	None
TRINITY_DN57388_c1_g1	0.00228447	-8.77392	3.02e-12	9.14e-10	yes	down	3.625	0	3.5	3.58	2.71	3.43	4.76	3.77	0	0	0	0	0	0	0	0	0	0	0	0	0	0	0	0	0	None
TRINITY_DN60742_c1_g4	0.0150581	-6.05332	3.02e-12	9.14e-10	yes	down	0.628333	0.00941177	1.6	0.32	0.53	0.13	0.67	0.52	0	0	0.04	0	0.04	0	0	0	0	0	0	0	0.04	0	0.04	0	0	None
TRINITY_DN50578_c1_g1	0.00678261	-7.20394	3.07e-12	9.28e-10	yes	down	33.1817	0.310588	26.4	32.59	36.56	49.99	22.72	30.83	0.12	0	0.42	0.98	0.54	0.36	0	0	0.42	0.23	0.06	0.84	0.36	0.95	0	0	0	None
TRINITY_DN60709_c2_g5	0.0121715	-6.36035	3.16e-12	9.52e-10	yes	down	48.0167	0.972941	35.97	37.85	58.82	69.2	33.65	52.61	2.44	1.86	0.96	0.18	0.29	0.08	0	0.83	2.47	5.09	0.8	0.24	0.37	0.18	0.37	0.38	0	XP_022816385.1(elongation of very long chain fatty acids protein AAEL008004-like [Spodoptera litura])
TRINITY_DN33629_c0_g2	0.0205861	-5.60218	3.29e-12	9.89e-10	yes	down	4.475	0.108824	2.16	5.95	9.28	2.82	2.67	3.97	0.94	0.16	0	0	0	0.13	0	0.14	0	0	0.33	0	0	0.15	0	0	0	XP_022822284.1(pancreatic triacylglycerol lipase-like [Spodoptera litura])
TRINITY_DN61510_c0_g2	0.186963	-2.41917	3.37e-12	1.01e-09	yes	down	52.7967	14.3406	53.97	44.71	66.18	75.53	35.43	40.96	19.48	12.81	17.85	10.75	12.05	14.6	12.65	12.86	21.78	17.45	17.67	9.97	12.14	11.28	9.56	11.25	19.64	None
TRINITY_DN68840_c0_g1	0.0147417	-6.08395	3.5e-12	1.05e-09	yes	down	0.953333	0.00882353	0.59	0.95	0.36	0.43	2.17	1.22	0	0	0	0	0	0.15	0	0	0	0	0	0	0	0	0	0	0	None
TRINITY_DN52487_c0_g2	91.6842	6.5186	3.57e-12	1.07e-09	yes	up	3.05	388.304	3.21	2.71	0.97	4.28	2.54	4.59	306.13	265	280.08	680.88	684.85	674.98	156.12	98.53	373.23	306.15	363.16	688.56	718.26	663.04	126.09	104.08	112.03	None
TRINITY_DN58083_c0_g1	0.0423338	-4.56205	3.7e-12	1.11e-09	yes	down	9.17	0.547647	9.46	10.74	7.49	4.41	7.26	15.66	0.12	0.48	0.29	0.82	0.97	0.53	0.21	0.15	0.62	0.29	0.5	1.06	1.27	1.31	0.13	0.17	0.39	XP_022830767.1(putative inorganic phosphate cotransporter [Spodoptera litura])
TRINITY_DN60344_c1_g4	0.0580509	-4.10654	3.72e-12	1.11e-09	yes	down	43.3117	3.48706	46.7	47.15	41.08	33.5	54.41	37.03	1.02	2.11	0.85	2.12	2.56	3.34	8.36	6.17	2.87	3.44	1.22	2.27	1.97	2.89	5.64	9.07	3.38	XP_014365284.1(PREDICTED: transcription factor GATA-6-like isoform X2 [Papilio machaon])
TRINITY_DN56786_c0_g1	0.0565611	-4.14405	3.72e-12	1.11e-09	yes	down	1.715	0.215294	1.08	1.12	3.14	1.29	1.66	2	0.11	0.18	0.1	0.3	0.25	0.31	0.09	0.2	0.37	0.16	0.04	0.13	0.51	0.25	0.04	0.19	0.43	XP_022816507.1(peroxidase-like [Spodoptera litura])
TRINITY_DN52864_c0_g1	0.012571	-6.31376	3.8e-12	1.13e-09	yes	down	4.08	0.0529412	3.76	3.96	5.75	5.45	3.41	2.15	0	0	0	0	0	0	0.45	0	0	0	0	0	0	0	0	0.14	0.31	XP_022816824.1(uncharacterized protein LOC111349806 [Spodoptera litura])
TRINITY_DN13226_c0_g1	0.0174791	-5.83823	3.86e-12	1.15e-09	yes	down	0.865	0.00764706	1.59	0.67	1.63	0.4	0.37	0.53	0.13	0	0	0	0	0	0	0	0	0	0	0	0	0	0	0	0	KLV34200.1(hypothetical protein AB894_15325, partial [Piscirickettsia salmonis])
TRINITY_DN46459_c1_g1	0.130294	-2.94015	3.86e-12	1.15e-09	yes	down	582.737	107.866	708.95	514.73	623.93	609.99	504.13	534.69	80.91	100.16	105.63	89.62	119.67	181.59	50	58.58	106.39	102.4	180.03	111.25	95.77	189.35	98.71	91.73	71.94	None
TRINITY_DN55225_c2_g1	0.0167948	-5.89584	3.97e-12	1.18e-09	yes	down	0.635	0.00705882	0.44	0.59	0.48	0.26	0.68	1.36	0	0	0	0	0	0	0.06	0	0	0	0	0	0	0	0	0.06	0	None
TRINITY_DN56132_c0_g1	0.0187272	-5.73872	4.09e-12	1.21e-09	yes	down	0.341667	0.00294118	0.34	0.09	0.46	0.41	0.35	0.4	0	0	0	0.05	0	0	0	0	0	0	0	0	0	0	0	0	0	None
TRINITY_DN63965_c3_g1	0.0643137	-3.95873	4.3e-12	1.27e-09	yes	down	3.785	0.394118	2.07	2.15	0.47	6.74	6.49	4.79	0.43	0.72	0.31	0.28	0.38	0.34	0.24	0.21	0.73	0.57	0.43	0.18	0.21	0.1	0.38	0.56	0.63	XP_022830289.1(three-prime repair exonuclease 1-like [Spodoptera litura])
TRINITY_DN52256_c0_g1	0.00669532	-7.22263	4.32e-12	1.28e-09	yes	down	19.1517	0.204118	14.38	10.93	19.92	20.52	26.8	22.36	0.17	0.14	0	0.6	0.25	0.53	0	0	0.13	0	0.07	0.45	0.39	0.74	0	0	0	XP_022837262.1(uncharacterized protein LOC111364586 [Spodoptera litura])
TRINITY_DN48604_c0_g1	0.0144317	-6.11462	4.53e-12	1.34e-09	yes	down	1.21667	0.0188235	1.58	0.78	1.31	1.01	1.45	1.17	0	0	0	0	0	0	0.09	0	0	0	0	0.04	0.14	0	0	0	0.05	ADI61810.1(endonuclease-reverse transcriptase [Bombyx mori])
TRINITY_DN59719_c2_g3	0.00224938	-8.79626	4.54e-12	1.34e-09	yes	down	2.74	0	2.87	1.31	4.3	3.16	2.26	2.54	0	0	0	0	0	0	0	0	0	0	0	0	0	0	0	0	0	None
TRINITY_DN61232_c0_g1	0.256546	-1.96271	4.91e-12	1.45e-09	yes	down	145.76	53.9982	127.94	126.65	171.13	151.76	140	157.08	68.74	74.25	72.64	64.37	64.65	51.73	36.57	39.1	52.49	55.31	57.11	49.41	58.16	53.71	35.27	42.51	41.95	None
TRINITY_DN35287_c0_g1	0.00266028	-8.5542	5.01e-12	1.47e-09	yes	down	64.2767	0.235294	61.58	78.48	55.12	73.34	58.58	58.56	0.11	0.03	0.12	0	0.03	0.04	0.33	0.84	0	0.14	0.03	0	0	0	0.5	1.25	0.58	XP_022824627.1(uncharacterized protein LOC111355121 [Spodoptera litura])
TRINITY_DN47751_c0_g1	0.0100808	-6.63224	5.09e-12	1.49e-09	yes	down	0.603333	0.00529412	1.1	0.63	1.05	0.02	0.42	0.4	0	0	0	0.03	0	0	0	0.06	0	0	0	0	0	0	0	0	0	XP_022829621.1(protein phosphatase 1 regulatory subunit 36-like [Spodoptera litura])
TRINITY_DN60769_c0_g2	0.0115114	-6.44079	5.28e-12	1.55e-09	yes	down	1.37	0.0164706	2.83	0.31	0.98	1.1	1.92	1.08	0	0	0	0	0	0	0	0	0	0.06	0	0	0	0	0	0	0.22	None
TRINITY_DN49727_c0_g1	0.143957	-2.79629	5.45e-12	1.6e-09	yes	down	152.528	30.7159	139.04	177.63	113.49	133.52	182.5	168.99	22.66	22.84	20.97	29.04	28.44	26.4	51.46	39.58	26.14	21.13	30.41	27.54	27.46	26.48	30.58	52.85	38.19	XP_022830676.1(uncharacterized protein LOC111359382 [Spodoptera litura])
TRINITY_DN160702_c0_g1	76.0115	6.24815	5.59e-12	1.63e-09	yes	up	0.125	13.9706	0	0.16	0.22	0.15	0.14	0.08	7	6.79	7.03	19.9	19.39	19.44	7.97	19.52	14.09	8.95	7.34	19.74	17.64	16.89	14.39	16.92	14.5	XP_022830424.1(putative inactive cysteine synthase 2 [Spodoptera litura])
TRINITY_DN45894_c0_g1	0.0127553	-6.29276	5.83e-12	1.7e-09	yes	down	0.495	0.00705882	1.03	0.2	0.3	0.76	0.57	0.11	0	0	0.04	0	0	0	0	0	0.06	0	0	0	0	0	0.02	0	0	XP_022828848.1(glucose dehydrogenase [FAD, quinone]-like [Spodoptera litura])
TRINITY_DN43788_c0_g1	0.0132239	-6.24071	5.9e-12	1.72e-09	yes	down	2.12333	0.06	1.82	1.88	1.46	2.42	3.09	2.07	0.09	0.23	0.04	0	0	0.2	0.08	0	0.02	0	0	0	0	0.04	0.1	0	0.22	XP_022814954.1(fatty acyl-CoA reductase 1-like [Spodoptera litura])
TRINITY_DN52058_c0_g1	0.00976736	-6.67782	5.91e-12	1.72e-09	yes	down	2.77	0.0494118	3.25	1.63	2.53	2.46	4.54	2.21	0.06	0	0.02	0	0.03	0.12	0	0	0	0.02	0.21	0.08	0.17	0.13	0	0	0	XP_022815682.1(solute carrier organic anion transporter family member 2A1-like [Spodoptera litura])
TRINITY_DN54848_c0_g1	0.0119902	-6.382	5.94e-12	1.73e-09	yes	down	0.566667	0.0111765	0.83	0.11	0.22	0.69	0.52	1.03	0	0	0	0	0	0	0	0	0	0	0	0	0	0	0.19	0	0	None
TRINITY_DN61250_c4_g1	0.0120835	-6.37081	6.08e-12	1.76e-09	yes	down	18.7933	0.191765	20.69	29.54	39.81	7.86	8.33	6.53	0	0	0	0	0	0	0	0	0	0	0	0	3.26	0	0	0	0	None
TRINITY_DN161696_c0_g1	0.0862876	-3.5347	6.1e-12	1.77e-09	yes	down	12.5817	1.61353	10.1	13.53	9.19	9.19	14.93	18.55	2.35	1.94	2.2	1.25	1.73	1.42	0.13	0.66	3.09	2.35	1.92	1.85	2.07	1.42	1.18	0.89	0.98	XP_022828600.1(spherulin-2A-like [Spodoptera litura])
TRINITY_DN56106_c0_g1	0.145596	-2.77996	6.29e-12	1.82e-09	yes	down	105.56	21.4706	126.31	117.98	78.33	74.56	126.33	109.85	15.72	8.75	15.18	19.56	25.43	18.28	32.67	28.4	18.98	16.6	15.09	18.78	19.34	23.43	24.48	44.04	20.27	XP_022827515.1(vegetative cell wall protein gp1-like [Spodoptera litura])
TRINITY_DN59697_c2_g1	0.00245061	-8.67264	6.43e-12	1.86e-09	yes	down	34.0833	0	30.37	21.19	49.23	55.38	26.43	21.9	0	0	0	0	0	0	0	0	0	0	0	0	0	0	0	0	0	None
TRINITY_DN62555_c2_g1	0.184482	-2.43845	6.46e-12	1.86e-09	yes	down	215.423	66.5324	174.09	175.39	228.13	264.54	262.01	188.38	68.16	37.98	72.26	93.3	86.06	75.5	30.98	65.98	68.36	83.07	68.39	80.7	78.99	78.02	51.39	51.82	40.09	XP_022830239.1(pyrimidodiazepine synthase-like [Spodoptera litura])
TRINITY_DN42724_c0_g1	0.00566577	-7.46351	6.49e-12	1.87e-09	yes	down	9.13333	0.0452941	5.76	0.46	0.64	0.2	36.79	10.95	0	0.25	0	0	0	0	0	0	0	0	0.27	0	0.25	0	0	0	0	XP_022817915.1(cuticle protein 19-like [Spodoptera litura])
TRINITY_DN52412_c0_g1	0.00607142	-7.36375	6.83e-12	1.97e-09	yes	down	177.027	1.71765	156.83	127.84	156.49	130.93	197.97	292.1	0.96	0.22	0.56	0.94	0.89	0.22	0.04	0.37	0.57	0.33	0.36	0.33	2.64	3.39	0.17	16.44	0.77	XP_022829695.1(lipopolysaccharide-induced tumor necrosis factor-alpha factor-like [Spodoptera litura])
TRINITY_DN56800_c1_g3	0.00919816	-6.76444	7.1e-12	2.04e-09	yes	down	6.44667	0.15	16.74	5.7	6.79	6.01	1.77	1.67	0	0.09	0	0.16	0	1.23	0	0.65	0	0	0.09	0	0	0.33	0	0	0	None
TRINITY_DN58837_c1_g1	0.0178913	-5.8046	7.25e-12	2.08e-09	yes	down	2.515	0.0288235	3.08	3.34	2.35	2.03	1.63	2.66	0	0	0	0	0	0	0	0.49	0	0	0	0	0	0	0	0	0	ADI61810.1(endonuclease-reverse transcriptase [Bombyx mori])
TRINITY_DN63503_c5_g3	0.0144224	-6.11555	7.27e-12	2.08e-09	yes	down	257.243	7.74882	275.42	283.09	2.59	1.76	367.34	613.26	14.43	24.88	14.55	1	2.32	4.81	4.63	2.55	7.22	11.58	18.07	4.93	5.41	2.94	4.65	4.39	3.37	None
TRINITY_DN59943_c2_g2	0.0258262	-5.27502	7.28e-12	2.08e-09	yes	down	30.9983	4.62647	42.74	34.9	31.62	24.24	30.8	21.69	0.62	0.29	14.74	6.4	4.76	6.19	0.13	0.5	10.13	12.74	0.3	0	4.98	1.98	14.48	0	0.41	None
TRINITY_DN39516_c0_g1	0.0126471	-6.30505	7.36e-12	2.1e-09	yes	down	52.1233	0.882353	28.21	19.63	134.04	63.19	39.12	28.55	0	0	0.15	0.85	0.29	0.65	0.43	2.37	1.26	0	1.92	1.16	2.52	2.63	0.15	0.47	0.15	None
TRINITY_DN51097_c0_g2	0.148152	-2.75485	7.62e-12	2.18e-09	yes	down	56.96	12.2559	58.6	64.78	56.93	43.12	67.9	50.43	10.52	10.65	12.22	14.86	15.72	17.68	4.83	3.84	16.49	16.99	16.35	16.8	17.37	14.39	8.3	5.82	5.52	XP_022821136.1(carbonyl reductase [NADPH] 3-like [Spodoptera litura])
TRINITY_DN46889_c1_g1	0.0493115	-4.34193	7.64e-12	2.18e-09	yes	down	78.9883	5.48059	74.77	76.78	43.75	51.1	139.95	87.58	3.73	3.81	5.24	9.87	12.31	7.33	0.49	4.85	1.61	6.99	1.38	11.05	5.66	6.48	2.59	7.77	2.01	None
TRINITY_DN60940_c1_g1	0.091186	-3.45504	7.68e-12	2.19e-09	yes	down	14.325	1.81765	12.65	9.36	17.49	16.54	18.06	11.85	1.38	1.14	1.18	2.56	2.27	2.35	0.49	1.02	2.08	2.01	1.76	2.83	3.34	4.32	0.68	0.64	0.85	XP_022819892.1(protein white [Spodoptera litura])
TRINITY_DN55192_c0_g1	0.108314	-3.2067	7.83e-12	2.23e-09	yes	down	25.93	4.30941	21.03	16.63	18.81	37.72	38.74	22.65	4.9	7.87	5.43	3.71	4.07	2.51	1.75	3.82	5.85	10.66	5.97	4.18	2.1	3.36	1.12	2.91	3.05	XP_022827867.1(MAPK-interacting and spindle-stabilizing protein-like [Spodoptera litura])
TRINITY_DN55807_c3_g1	0.013758	-6.18359	8.08e-12	2.3e-09	yes	down	3.26	0.0564706	2.97	3.33	0.57	3.02	6.62	3.05	0.11	0	0.05	0.23	0.23	0.08	0	0.04	0	0	0	0.08	0.09	0.05	0	0	0	None
TRINITY_DN59090_c3_g5	0.0168014	-5.89527	8.1e-12	2.3e-09	yes	down	19.3	0.441765	21.1	12.95	17.04	18.01	38.35	8.35	0.89	0.39	0	1.51	0.76	0.61	0.27	0.04	0.19	0	0.54	0.69	0.37	0.92	0.14	0.05	0.14	XP_022816668.1(larval cuticle protein LCP-17-like [Spodoptera litura])
TRINITY_DN158461_c0_g1	0.0543583	-4.20136	8.19e-12	2.32e-09	yes	down	2.77	0.207059	2.32	1.96	2.01	2.72	4.57	3.04	0.07	0.32	0.32	0.15	0.06	0.13	0.4	0.27	0.18	0.05	0.25	0.09	0.15	0.04	0.32	0.28	0.44	XP_022817343.1(decaprenyl-diphosphate synthase subunit 2-like [Spodoptera litura])
TRINITY_DN56482_c3_g1	0.024464	-5.35319	8.23e-12	2.33e-09	yes	down	109.89	4.09882	97.57	60.11	66.32	52.54	186.98	195.82	7.95	4.14	2.98	9.8	9.86	4.95	1.83	0.1	3.01	3.03	2.02	4.51	7.49	5.84	0.3	1.3	0.57	XP_022823982.1(leukocyte surface antigen CD53-like [Spodoptera litura])
TRINITY_DN52900_c0_g1	0.011938	-6.38829	8.35e-12	2.36e-09	yes	down	4.11333	0.0658824	4.53	3.07	0.9	4.38	6.47	5.33	0	0.03	0	0.21	0.03	0.1	0.05	0.03	0.09	0	0.04	0.16	0.12	0.23	0	0.03	0	XP_022826241.1(fatty acid 2-hydroxylase [Spodoptera litura])
TRINITY_DN63555_c0_g1	0.00312693	-8.32104	8.42e-12	2.37e-09	yes	down	3.36167	0	4.57	3.22	3.61	3.32	2.56	2.89	0	0	0	0	0	0	0	0	0	0	0	0	0	0	0	0	0	None
TRINITY_DN96862_c0_g1	0.0221482	-5.49667	8.45e-12	2.38e-09	yes	down	20.5933	0.58	20.98	7.42	38.11	15.9	19.25	21.9	0.29	0	0.52	0.74	0	0	2.18	0	0.8	0.87	0.28	1.35	0.52	0.76	0.52	0.53	0.5	XP_022818464.1(uncharacterized protein LOC111350961 isoform X3 [Spodoptera litura])
TRINITY_DN58563_c3_g3	0.00409879	-7.93059	8.55e-12	2.4e-09	yes	down	12.055	0.0941176	11.53	7.99	8.83	11.97	15.56	16.45	0	0	0	0	0	0	0	0.06	0	0	0	0	0	0	0.23	0.37	0.94	XP_022823920.1(uncharacterized protein LOC111354604 [Spodoptera litura])
TRINITY_DN58802_c2_g3	0.125882	-2.98986	9.22e-12	2.59e-09	yes	down	6.62167	1.33471	9.18	7.52	4.67	9.52	4.47	4.37	1.36	1.28	1.72	1.51	1.63	1.43	0.64	0.5	1.29	1.53	1.58	1.8	1.32	2.04	0.79	1.33	0.94	XP_022823639.1(uncharacterized protein LOC111354417 [Spodoptera litura])
TRINITY_DN85601_c0_g1	0.0179516	-5.79975	9.26e-12	2.6e-09	yes	down	20.6917	0.528235	18.3	22.85	26.58	26.39	15.22	14.81	1.13	1.07	0.26	0	0	0	0	0.94	0.79	0.58	1.13	0	0	0	1.81	0.53	0.74	None
TRINITY_DN9031_c0_g1	0.0193622	-5.69061	9.76e-12	2.73e-09	yes	down	1.28667	0.0105882	0.93	0.73	0.83	0.8	3.22	1.21	0	0	0	0.18	0	0	0	0	0	0	0	0	0	0	0	0	0	KPJ18926.1(hypothetical protein RR48_12437 [Papilio machaon])
TRINITY_DN44966_c0_g1	0.0116596	-6.42234	9.77e-12	2.73e-09	yes	down	10.7883	0.0970588	10.09	4.93	1.41	21.35	15.98	10.97	0	0	0	0	0.32	0	0	0	0	0	0	0	0	0	0	1.33	0	None
TRINITY_DN56620_c9_g1	0.0826615	-3.59664	1.02e-11	2.85e-09	yes	down	31.335	7.27235	30.63	24.94	16.55	45.49	50.52	19.88	11.35	3.16	6.59	7.41	7.78	7.02	5.64	9.21	7.31	6.16	10	9.5	5.97	9.08	8.29	6.09	3.07	PCG72152.1(hypothetical protein B5V51_1102 [Heliothis virescens])
TRINITY_DN57712_c7_g3	0.121704	-3.03855	1.03e-11	2.86e-09	yes	down	88.43	12.7453	82.66	148	70.86	57.63	110.26	61.17	16.28	25	13.02	17.2	15.46	12.17	7.14	12.04	12.47	14.99	11.93	8.18	14.95	7.97	7.62	6.87	13.38	XP_022826690.1(uncharacterized protein LOC111356522 [Spodoptera litura])
TRINITY_DN59875_c0_g1	0.0174899	-5.83734	1.03e-11	2.88e-09	yes	down	1.92	0.0441176	0.75	1.47	2.36	1.68	3.02	2.24	0.04	0.07	0.1	0.03	0	0.09	0	0.03	0	0.26	0.1	0.03	0	0	0	0	0	XP_022815155.1(farnesyl pyrophosphate synthase 2-like [Spodoptera litura])
TRINITY_DN16847_c0_g1	0.0089205	-6.80866	1.04e-11	2.88e-09	yes	down	1.83333	0.0147059	3.51	2.08	2.88	0	0.89	1.64	0	0	0	0	0	0	0	0.18	0	0	0	0	0	0	0	0	0.07	XP_022825489.1(LOW QUALITY PROTEIN: uncharacterized protein LOC111355690 [Spodoptera litura])
TRINITY_DN33185_c0_g1	0.00668165	-7.22558	1.05e-11	2.91e-09	yes	down	1.29	0.0105882	1.66	1.07	2.61	0.3	1.03	1.07	0	0	0	0	0	0.02	0	0.07	0.01	0	0	0.01	0	0	0	0	0.07	XP_022833256.1(uncharacterized protein LOC111361116 [Spodoptera litura])
TRINITY_DN60239_c8_g1	0.0514288	-4.28128	1.05e-11	2.91e-09	yes	down	161.197	10.4212	116.15	90.55	54.87	319.42	323.37	62.82	8.86	10	8.4	19.84	19.73	20.93	0.73	1.66	13.14	10.29	12.22	14.86	17.43	14.42	1.19	1.27	2.19	KPJ11409.1(Transposon Ty3-G Gag-Pol polyprotein [Papilio machaon])
TRINITY_DN52049_c1_g2	0.0172477	-5.85745	1.1e-11	3.04e-09	yes	down	4.65667	0.124118	4.25	6.4	6.39	9.35	1	0.55	0.34	0.24	0.48	0.13	0.04	0.06	0.09	0.06	0.04	0.07	0.18	0	0	0.03	0	0.22	0.13	XP_022831164.1(lipase member H-like [Spodoptera litura])
TRINITY_DN55433_c0_g1	0.0310608	-5.00876	1.1e-11	3.04e-09	yes	down	142.572	6.08294	116.89	105.33	206.19	171.56	151.36	104.1	0.27	1.22	2.14	6.73	9.01	4.7	4.36	25.19	1.25	2.78	1.97	7.64	8.17	3.22	4.16	13.79	6.81	XP_022828332.1(circadian clock-controlled protein-like [Spodoptera litura])
TRINITY_DN59017_c2_g1	0.0464458	-4.42831	1.1e-11	3.05e-09	yes	down	30.585	1.86059	33.63	29.13	25.11	28.44	41.39	25.81	0.85	0.3	0.86	1.73	1.44	1.66	6.87	1.62	0.99	1.15	0.77	1.7	1.5	0.96	1.61	1.35	6.27	XP_022835751.1(RING finger protein nhl-1-like [Spodoptera litura])
TRINITY_DN62729_c0_g3	0.0146251	-6.09541	1.14e-11	3.15e-09	yes	down	1.72833	0.0205882	0.47	1.65	1.75	2.97	1.48	2.05	0	0	0	0	0.35	0	0	0	0	0	0	0	0	0	0	0	0	None
TRINITY_DN43257_c0_g1	0.0208552	-5.58345	1.15e-11	3.17e-09	yes	down	1.32167	0.0152941	1.22	1.64	2.25	0.54	1.31	0.97	0.26	0	0	0	0	0	0	0	0	0	0	0	0	0	0	0	0	XP_022826781.1(general odorant-binding protein lush-like [Spodoptera litura])
TRINITY_DN61186_c1_g1	0.162481	-2.62166	1.15e-11	3.16e-09	yes	down	31.1033	7.71294	27.07	31.28	17.11	23.41	46.77	40.98	6.74	6.1	11.13	7.33	10.31	8.76	3.3	3.22	8.04	5.82	7.02	9.99	9.65	11.71	9.44	7.54	5.02	XP_022829108.1(uncharacterized protein LOC111358274 [Spodoptera litura])
TRINITY_DN62314_c2_g5	0.00322962	-8.27442	1.18e-11	3.23e-09	yes	down	1.285	0	1.55	1.09	1.91	0.78	1.28	1.1	0	0	0	0	0	0	0	0	0	0	0	0	0	0	0	0	0	None
TRINITY_DN42647_c0_g1	0.234411	-2.09289	1.19e-11	3.27e-09	yes	down	37.5467	12.6694	31.14	25.67	36.45	31.53	59.07	41.42	15.61	15.7	14.8	11.6	11.32	10.41	9.19	8.86	17.36	15.21	17.39	11.74	11.31	11.7	10.98	11.57	10.63	XP_021199072.1(S-methyl-5'-thioadenosine phosphorylase [Helicoverpa armigera])
TRINITY_DN58574_c1_g2	0.00289952	-8.42997	1.22e-11	3.36e-09	yes	down	3.475	0	1.53	5.16	3.34	3.83	3.18	3.81	0	0	0	0	0	0	0	0	0	0	0	0	0	0	0	0	0	XP_022837598.1(uncharacterized protein LOC111364789 [Spodoptera litura])
TRINITY_DN52360_c0_g1	0.0253861	-5.29982	1.27e-11	3.48e-09	yes	down	34.095	1.40882	32.06	38.34	18.77	46.33	38.27	30.8	0.12	0.77	0.66	3.45	2.88	1.72	1.23	0.05	1.65	0.56	0.11	2.75	3.69	2.97	0.19	0.69	0.46	XP_022826709.1(uncharacterized protein LOC111356539 [Spodoptera litura])
TRINITY_DN147846_c1_g1	0.00311636	-8.32592	1.27e-11	3.49e-09	yes	down	5.80167	0	6.68	4.79	6.14	3.05	5.08	9.07	0	0	0	0	0	0	0	0	0	0	0	0	0	0	0	0	0	None
TRINITY_DN59959_c1_g2	0.133791	-2.90195	1.29e-11	3.53e-09	yes	down	5.02	1.11882	5.39	4.49	4.96	3.73	5.78	5.77	0.42	0.84	3.13	1.68	0.9	0.96	0.66	0.89	1.22	1.18	1.02	1.63	0.88	0.82	1.04	1.19	0.56	XP_022826643.1(probable 4-coumarate--CoA ligase 3 [Spodoptera litura])
TRINITY_DN61961_c3_g1	0.0272591	-5.19712	1.32e-11	3.61e-09	yes	down	4.99667	0.232353	2.91	5.52	4.78	3.3	7.19	6.28	0.32	0.66	0.64	0.45	0	0.08	0.09	0	0	0.32	0.21	0.42	0.28	0.09	0	0.39	0	XP_022817250.1(cytochrome P450 6B7-like [Spodoptera litura])
TRINITY_DN64032_c0_g1	0.00321446	-8.28121	1.34e-11	3.66e-09	yes	down	1.78167	0	1.36	2.56	1.78	1.64	1.12	2.23	0	0	0	0	0	0	0	0	0	0	0	0	0	0	0	0	0	None
TRINITY_DN19107_c0_g1	0.0102418	-6.60939	1.43e-11	3.88e-09	yes	down	4.16833	0.0511765	4.02	2.69	3.39	4.67	5.7	4.54	0	0	0	0	0.05	0	0	0.44	0	0	0	0	0	0	0.16	0.11	0.11	None
TRINITY_DN14043_c0_g1	0.0029311	-8.41434	1.45e-11	3.95e-09	yes	down	8.58833	0	12.96	6.4	7.34	9.72	11.6	3.51	0	0	0	0	0	0	0	0	0	0	0	0	0	0	0	0	0	EPR81882.1(putative peptidoglycan bound protein [Acinetobacter gerneri MTCC 9824])
TRINITY_DN56605_c0_g4	0.00931577	-6.74611	1.48e-11	4.02e-09	yes	down	109.133	1.35765	32.83	17.49	433.79	77.99	49.29	43.41	0.21	0.81	0	0	0.38	1.02	0.36	5.41	1.79	0.86	1.05	2.35	3.5	3.6	1.54	0.2	0	None
TRINITY_DN63817_c4_g1	0.273807	-1.86877	1.49e-11	4.04e-09	yes	down	104.332	43.8682	97.38	110.3	98.47	126.76	70.87	122.21	40.55	33.9	46.75	32.88	30.35	31.56	82.79	53.33	44.3	48.01	44.62	33.64	24.87	31.78	51.76	59.25	55.42	XP_022831707.1(fatty acid synthase-like isoform X1 [Spodoptera litura])
TRINITY_DN47924_c0_g1	0.0182449	-5.77637	1.5e-11	4.07e-09	yes	down	1.71667	0.0247059	1.88	0.42	2.06	3.38	1.36	1.2	0	0	0	0	0	0	0	0	0	0	0	0.13	0	0.29	0	0	0	XP_022821391.1(uncharacterized protein LOC111352917 isoform X3 [Spodoptera litura])
TRINITY_DN52332_c0_g1	0.0381464	-4.71231	1.54e-11	4.15e-09	yes	down	33.0433	1.68059	16.56	27.55	65.4	22.76	38.43	27.56	0	1.22	0.64	1.29	1.49	0.62	0	0.53	2.4	0.65	0.68	1.78	2.17	1.47	12.22	0.95	0.46	XP_022814215.1(uncharacterized protein LOC111348002 [Spodoptera litura])
TRINITY_DN55565_c0_g1	0.0162565	-5.94284	1.54e-11	4.16e-09	yes	down	3.05	0.0670588	3.66	2.86	1.88	2.41	2.93	4.56	0	0.07	0.23	0.12	0.15	0.06	0	0	0.03	0	0	0.11	0.06	0.09	0	0.22	0	None
TRINITY_DN49717_c0_g1	0.0840659	-3.57233	1.57e-11	4.22e-09	yes	down	3.13833	0.431765	2.68	3.93	2.84	2.5	4.04	2.84	0.16	0.34	0.67	0.55	0.59	0.37	0.68	0.43	0.38	0.41	0.41	0.25	0.11	0.1	0.49	0.47	0.93	XP_022818116.1(glucose-dependent insulinotropic receptor-like isoform X1 [Spodoptera litura])
TRINITY_DN59592_c3_g1	6.91501	2.78973	1.59e-11	4.27e-09	yes	up	4.39333	42.9229	3.87	4	5.52	4.18	4.94	3.85	32.19	33.07	36.64	45.25	46.23	48.68	39.35	47.32	50.16	38.33	44.57	50.72	33.43	58.52	40.01	46.92	38.3	None
TRINITY_DN58887_c4_g1	0.0156428	-5.99836	1.59e-11	4.29e-09	yes	down	7.97833	0.122941	6.49	2.07	8.41	14.1	6.75	10.05	0	0	1.71	0	0	0	0	0	0	0	0	0.38	0	0	0	0	0	None
TRINITY_DN56591_c0_g2	0.0792005	-3.65835	1.6e-11	4.29e-09	yes	down	28.6933	3.85882	27.9	22.04	49.56	37.32	24.13	11.21	4.37	2.82	1	5.07	5.93	8.47	4.91	2.19	1.19	1.81	3.02	6.5	3.89	4.89	4	3.09	2.45	None
TRINITY_DN52259_c1_g1	0.0246397	-5.34287	1.6e-11	4.29e-09	yes	down	3.61833	0.0994118	4.36	2.87	2.73	1.03	5.22	5.5	0.16	0.12	0.13	0	0.12	0.03	0	0.03	0.28	0.1	0.54	0	0.09	0	0.03	0.06	0	None
TRINITY_DN49818_c0_g2	0.187774	-2.41293	1.6e-11	4.3e-09	yes	down	25.79	7.10471	24.02	16.05	14.02	24.51	57.5	18.64	9.75	8.14	8.03	5.96	4.73	6.05	3.34	6.02	9.63	8.17	7.03	5.96	7	7.95	9.94	5.03	8.05	XP_022824197.1(scavenger receptor class B member 1-like [Spodoptera litura])
TRINITY_DN54007_c0_g2	0.126154	-2.98674	1.61e-11	4.3e-09	yes	down	45.07	7.93824	38.17	28.77	31.01	57.67	66.33	48.47	3.44	3.93	5.16	10.51	10.71	10.48	3.83	8.77	8.44	5.55	8.32	11.5	11.15	11.09	7.75	6.6	7.72	XP_022816468.1(cuticle protein 7-like isoform X1 [Spodoptera litura])
TRINITY_DN109341_c0_g1	0.010178	-6.6184	1.66e-11	4.45e-09	yes	down	34.4017	0.458235	51.97	43.75	44.58	24.96	25.95	15.2	0	0	0	0.35	0	0	0	2.08	2.33	0	0	0	0.77	0	1.9	0	0.36	None
TRINITY_DN60709_c1_g1	0.00161331	-9.27576	1.67e-11	4.47e-09	yes	down	20.095	0	17.93	2.45	6.43	8.17	35.09	50.5	0	0	0	0	0	0	0	0	0	0	0	0	0	0	0	0	0	None
TRINITY_DN61607_c1_g3	0.0520699	-4.26341	1.69e-11	4.51e-09	yes	down	172.603	11.9882	106.41	85.81	93.87	420.54	273.11	55.88	12.3	9.29	11.34	24.48	25.98	25.43	1.39	2.91	13.88	10.46	11.5	15.37	14.5	14.28	5.4	3	2.29	XP_022819908.1(pro-cathepsin H-like isoform X2 [Spodoptera litura])
TRINITY_DN36331_c0_g1	0.0114478	-6.44878	1.71e-11	4.56e-09	yes	down	0.475	0.00352941	0.12	0.06	1.58	0.84	0.02	0.23	0	0.03	0	0	0	0	0	0	0	0	0	0	0	0.03	0	0	0	AGO62010.1(cytochrome P450 CYP340L1 [Spodoptera frugiperda])
TRINITY_DN51153_c0_g1	0.0152964	-6.03066	1.72e-11	4.58e-09	yes	down	5.71167	0.121176	5.25	2.41	3.55	3.79	11.22	8.05	0.08	0	0	0	0.26	0.45	0	0.03	0.1	0	0.32	0	0.51	0.17	0	0	0.14	None
TRINITY_DN104991_c0_g1	0.0183461	-5.76838	1.74e-11	4.61e-09	yes	down	2.64333	0.00705882	0.26	0.48	0.18	0.53	13.92	0.49	0	0	0.09	0	0	0	0	0	0.03	0	0	0	0	0	0	0	0	XP_021184774.1(uncharacterized protein LOC110372414 [Helicoverpa armigera])
TRINITY_DN59654_c3_g1	0.00933259	-6.74351	1.76e-11	4.67e-09	yes	down	1.52	0.0170588	1.07	1.59	1.32	1.51	2.07	1.56	0.03	0	0.01	0	0	0	0.01	0.14	0	0	0	0	0.01	0	0	0.08	0.01	XP_022836178.1(glucose dehydrogenase [FAD, quinone]-like [Spodoptera litura])
TRINITY_DN135039_c0_g1	0.0151073	-6.04861	1.77e-11	4.69e-09	yes	down	4.125	0.0452941	5.27	7.88	2.97	0.31	5.31	3.01	0	0	0	0	0	0	0	0	0	0	0	0	0	0	0	0.77	0	None
TRINITY_DN58585_c0_g1	0.106043	-3.23728	1.77e-11	4.69e-09	yes	down	19.1	2.71294	18.08	12.91	29.43	20.96	12.09	21.13	1.46	1.23	1.23	2.91	3.61	3.94	5.65	2.78	1.78	1.81	1.4	2.87	2.67	3.3	2.74	3.61	3.13	XP_022822845.1(protein msta [Spodoptera litura])
TRINITY_DN63291_c6_g1	325.462	8.34634	1.79e-11	4.72e-09	yes	up	0.00166667	1.54824	0	0	0	0.01	0	0	1.05	0.39	0.84	1.42	1.67	2.1	1.1	1.39	0.74	0.53	0.62	1.85	1.84	1.32	4.87	2.18	2.41	None
TRINITY_DN53265_c0_g1	17.4127	4.12207	1.79e-11	4.72e-09	yes	up	0.24	6.33471	0.15	0.31	0.19	0.25	0.27	0.27	9.33	10.07	10.26	3.96	4.26	5.06	3.14	2.92	12.93	10.1	10.49	4.97	4.59	4.29	3.62	4.48	3.22	None
TRINITY_DN52423_c0_g2	0.0112488	-6.47408	1.79e-11	4.72e-09	yes	down	10.8083	0.0852941	7.78	19.06	20.82	5.88	0	11.31	0	0	0	0	0	0	0	0	0	0	0	0	1.45	0	0	0	0	None
TRINITY_DN144371_c0_g1	0.00285768	-8.45094	1.81e-11	4.75e-09	yes	down	2.13667	0	1.18	2.45	2.12	1.73	1.18	4.16	0	0	0	0	0	0	0	0	0	0	0	0	0	0	0	0	0	XP_022824836.1(uncharacterized protein LOC111355285 [Spodoptera litura])
TRINITY_DN53519_c0_g1	0.0742454	-3.75156	1.82e-11	4.77e-09	yes	down	21.5217	1.09647	19.02	12.29	29.83	27.08	21.06	19.85	0.43	0.37	0.61	0.58	0.56	0.49	1.78	2.04	0.86	0.88	0.56	0.54	0.79	0.67	2.52	2.55	2.41	ANW09744.1(ABC transporter ok isoform B [Helicoverpa armigera])
TRINITY_DN29700_c0_g1	0.00277456	-8.49353	1.82e-11	4.78e-09	yes	down	92.1633	0	177.08	63.99	44.27	59.51	118.54	89.59	0	0	0	0	0	0	0	0	0	0	0	0	0	0	0	0	0	None
TRINITY_DN56308_c0_g1	72.0616	6.17116	1.82e-11	4.78e-09	yes	up	2.39833	192.016	1.61	4.13	3.02	1.02	3.82	0.79	59.86	73.94	39.23	220.51	186.7	152.64	469.32	96.43	132.27	130.93	134.79	267.29	184.42	216.37	349.94	312.21	237.43	XP_022835866.1(protein lethal(2)essential for life-like [Spodoptera litura])
TRINITY_DN58849_c0_g1	0.0121088	-6.3678	1.85e-11	4.85e-09	yes	down	511.963	8.45235	387.78	254.48	829.05	426.87	615.57	558.03	6.05	9.11	5.14	21.74	21.1	12.35	0.08	0.15	3.83	42.42	5.72	5.98	4.48	4.2	0.52	0.71	0.11	AKT26489.1(chemosensory protein 13 [Spodoptera exigua])
TRINITY_DN28611_c0_g1	0.00954631	-6.71084	1.86e-11	4.86e-09	yes	down	13.8	0.177647	10.67	13.71	10.48	26.7	11.79	9.45	0	0.16	0.1	0	0.05	0	0.1	0.71	0	0	0	0	0.15	0.25	0.44	0.66	0.4	ANI21986.1(UDP-glycosyltransferase 33B14 [Spodoptera exigua])
TRINITY_DN57787_c1_g2	0.0195783	-5.6746	1.88e-11	4.92e-09	yes	down	0.573333	0.00705882	0.6	0.21	0.73	0.74	0.61	0.55	0.12	0	0	0	0	0	0	0	0	0	0	0	0	0	0	0	0	None
TRINITY_DN41338_c0_g1	0.00366158	-8.09332	1.89e-11	4.92e-09	yes	down	28.86	0	38.75	17.27	18.75	27.4	52.92	18.07	0	0	0	0	0	0	0	0	0	0	0	0	0	0	0	0	0	None
TRINITY_DN45679_c1_g1	0.0362121	-4.78738	1.9e-11	4.96e-09	yes	down	6.13167	0.299412	4.21	2.98	9.59	2.93	5.19	11.89	0.08	0.46	0.45	1.06	0.28	0.26	0.14	0.06	0.3	0.24	0.16	0.38	0.58	0.43	0.14	0	0.07	None
TRINITY_DN60751_c2_g1	0.268919	-1.89476	1.91e-11	4.97e-09	yes	down	337.473	131.802	320.94	297.43	329.08	334.05	350.9	392.44	136.2	137.22	149.68	158.13	154.55	150.96	61.31	81.56	172.39	153.07	158.46	165.78	161.1	157	78.79	87.28	77.15	XP_022826791.1(V-type proton ATPase subunit D [Spodoptera litura])
TRINITY_DN120645_c0_g1	73.4028	6.19776	1.91e-11	4.97e-09	yes	up	0.085	9.52471	0.08	0.08	0.19	0.06	0.05	0.05	17.11	16.78	21.58	8.34	7.37	6.49	3.75	1.79	19.26	15.84	16.18	6.74	6.9	6.61	2.1	2.57	2.51	None
TRINITY_DN56493_c0_g1	0.0717578	-3.80072	1.93e-11	5.01e-09	yes	down	14.49	1.52059	17.27	16.94	8.38	10.61	15.79	17.95	0.43	0.52	0.47	1.98	1.41	1.28	0.92	2.87	1.32	0.53	0.46	2.33	2.58	1.82	2.5	2.28	2.15	XP_022821465.1(luciferin 4-monooxygenase-like [Spodoptera litura])
TRINITY_DN60079_c0_g1	0.243832	-2.03604	1.99e-11	5.16e-09	yes	down	194.152	69.9276	192.1	237.81	206.16	171.16	156.86	200.82	88.3	83.9	97.18	79.42	72.43	71.65	39.08	34.78	92.64	85.53	100.66	68.31	91	65.66	42.47	38.24	37.52	XP_022827910.1(short/branched chain specific acyl-CoA dehydrogenase, mitochondrial [Spodoptera litura])
TRINITY_DN54129_c1_g1	0.0250996	-5.31619	1.99e-11	5.16e-09	yes	down	1.34	0.0617647	1.07	1.79	1.53	1.2	1.21	1.24	0.02	0	0.31	0	0.09	0.02	0	0.03	0.08	0.09	0.1	0.03	0	0.19	0	0.09	0	XP_022832793.1(uncharacterized protein LOC111360808 isoform X4 [Spodoptera litura])
TRINITY_DN59795_c0_g2	0.2006	-2.31761	2.04e-11	5.28e-09	yes	down	22.2317	6.41059	23.79	21.88	14.77	21.58	29.51	21.86	6.5	4.99	5.35	8.39	7.28	6.39	2.86	6.86	8.12	5.97	7.48	5.76	6.42	6.5	5.53	9.28	5.3	XP_022827751.1(uncharacterized protein LOC111357351 [Spodoptera litura])
TRINITY_DN44336_c0_g1	0.0306343	-5.02871	2.11e-11	5.45e-09	yes	down	8.765	0.367059	8.23	3.63	8.41	6.82	14.09	11.41	0.21	0.29	0.58	1	0.63	0.65	0	0.08	0.1	0.42	0.61	0.08	0.66	0.65	0.09	0	0.19	XP_022814215.1(uncharacterized protein LOC111348002 [Spodoptera litura])
TRINITY_DN56002_c0_g1	0.019364	-5.69048	2.15e-11	5.55e-09	yes	down	12.8517	0.635882	15.29	17.68	6.59	9.37	9.9	18.28	0	0	0	0.32	0	0.46	0.37	0.31	0.4	0	0.43	0.34	2.55	2.44	1.69	0.48	1.02	None
TRINITY_DN13334_c0_g1	0.00285245	-8.45358	2.19e-11	5.64e-09	yes	down	5.81333	0	10.75	3.87	4.99	2.18	5.25	7.84	0	0	0	0	0	0	0	0	0	0	0	0	0	0	0	0	0	None
TRINITY_DN24674_c0_g1	0.0164361	-5.92699	2.23e-11	5.75e-09	yes	down	0.805	0.0141176	0.18	0.59	1.01	1.25	0.32	1.48	0	0	0	0	0	0	0	0.04	0	0.15	0.05	0	0	0	0	0	0	None
TRINITY_DN33640_c0_g1	0.0144039	-6.1174	2.25e-11	5.8e-09	yes	down	15.9567	0.261765	14.65	15.02	18.67	26.23	11.7	9.47	0	0	0	0.37	0	0	0.73	2.16	0	0	0	0	0	0	0.79	0.4	0	None
TRINITY_DN61099_c0_g1	41.5393	5.37641	2.31e-11	5.93e-09	yes	up	0.205	17.1465	0.18	0.07	0.21	0.27	0.29	0.21	26.39	22.6	27.28	11.19	10.28	12.95	3.8	2.3	50.9	41.97	23.06	20.21	12.57	13.22	4.17	4.26	4.34	XP_022827489.1(uncharacterized protein LOC111357139 [Spodoptera litura])
TRINITY_DN56345_c1_g1	0.104357	-3.2604	2.34e-11	6e-09	yes	down	16.7583	2.40588	15.54	18.63	20.05	21.91	12.11	12.31	0.94	1.07	1.37	1.87	1.92	2.04	3.88	3.73	1.61	1.41	1.76	2.04	2.38	2.38	4.59	4.8	3.11	XP_022814815.1(delta(24)-sterol reductase-like [Spodoptera litura])
TRINITY_DN26933_c0_g1	0.00385105	-8.02053	2.35e-11	6.03e-09	yes	down	1.22333	0	1.14	0.78	0.94	1.27	2.26	0.95	0	0	0	0	0	0	0	0	0	0	0	0	0	0	0	0	0	None
TRINITY_DN54713_c1_g1	0.00316082	-8.30549	2.4e-11	6.13e-09	yes	down	349.497	1.51412	340.06	248.8	383.86	383.63	395.77	344.86	0.09	0.25	0.17	0.12	0.15	0	1.07	4.92	0.33	0.09	0.21	0.11	0.24	0.12	6.4	7.71	3.76	XP_022822012.1(uncharacterized protein LOC111353286 [Spodoptera litura])
TRINITY_DN61491_c3_g1	0.0243416	-5.36043	2.42e-11	6.19e-09	yes	down	6.79	0.388235	3.89	9.23	5.72	5.8	7.83	8.27	0.08	0	0.71	0	0	0	0.14	0.68	0.74	2.44	0	0	0	0	0.07	0.84	0.9	XP_022831368.1(protein D2-like [Spodoptera litura])
TRINITY_DN52037_c1_g1	0.0165724	-5.91507	2.51e-11	6.41e-09	yes	down	555.8	4.60824	504.7	410.33	391.21	477.03	855.83	695.7	3.12	0.55	0.55	5.34	11.76	4.2	1.6	0	0.74	3.06	1.34	17.76	11.6	16.59	0	0	0.13	None
TRINITY_DN59648_c1_g1	0.0989057	-3.3378	2.53e-11	6.45e-09	yes	down	19.6383	2.75765	20.51	25.72	14.3	15.91	25.19	16.2	1.33	0.84	0.86	3.47	3.38	2.83	4.01	1.97	3.24	1.15	2.2	3.86	3.32	4.18	2.06	5.53	2.65	PCG77289.1(hypothetical protein B5V51_7650 [Heliothis virescens])
TRINITY_DN65706_c0_g1	0.068208	-3.87391	2.53e-11	6.44e-09	yes	down	8.99667	0.855882	9.76	8.82	6.75	9.92	9.51	9.22	0.48	0.62	0.26	0.53	0.4	0.39	1.49	0.74	0.74	0.87	0.68	0.37	0.51	0.39	1.89	2.51	1.68	XP_022820484.1(uncharacterized protein LOC111352285 [Spodoptera litura])
TRINITY_DN53302_c0_g2	0.00440595	-7.82633	2.53e-11	6.44e-09	yes	down	18.06	0.114706	21.52	15.07	16.58	11.83	21.39	21.97	0	0.16	0.04	0	0.03	0.03	0.18	0.73	0.05	0.02	0	0.01	0	0	0.09	0.44	0.17	XP_022829626.1(otopetrin-2-like [Spodoptera litura])
TRINITY_DN58232_c1_g1	0.0137268	-6.18686	2.54e-11	6.45e-09	yes	down	2.88	0.05	2.48	1.72	2.84	2.01	5.09	3.14	0	0	0.04	0.16	0.06	0.06	0	0.28	0.04	0	0	0.07	0.02	0.06	0	0	0.06	XP_022828712.1(glucose dehydrogenase [FAD, quinone]-like [Spodoptera litura])
TRINITY_DN64761_c1_g1	0.00291713	-8.42124	2.61e-11	6.63e-09	yes	down	2.93167	0	1.72	2.42	0.9	4.08	4.51	3.96	0	0	0	0	0	0	0	0	0	0	0	0	0	0	0	0	0	None
TRINITY_DN55699_c0_g2	0.00392555	-7.99289	2.61e-11	6.62e-09	yes	down	2.19833	0	0.51	0.45	10.41	0.32	0.79	0.71	0	0	0	0	0	0	0	0	0	0	0	0	0	0	0	0	0	None
TRINITY_DN26832_c1_g1	0.00358492	-8.12384	2.62e-11	6.62e-09	yes	down	5.90167	0	4.38	5.8	10.62	6.68	2.67	5.26	0	0	0	0	0	0	0	0	0	0	0	0	0	0	0	0	0	None
TRINITY_DN60917_c0_g1	6.56897	2.71567	2.63e-11	6.65e-09	yes	up	10.41	91.4582	9.96	8.89	8.62	11.53	13.17	10.29	47.31	53.28	55.91	100.54	94.69	100.38	88.51	100.74	79.99	66.81	79.71	109.1	94.36	129.58	136.55	120.4	96.93	XP_022825353.1(A disintegrin and metalloproteinase with thrombospondin motifs 3-like isoform X1 [Spodoptera litura])
TRINITY_DN62813_c0_g1	0.230735	-2.11569	2.73e-11	6.88e-09	yes	down	13.57	4.61647	13.78	12.38	14.06	14.07	15.66	11.47	5.57	6.25	5.81	2.97	4.15	3.67	1.89	4.16	5.78	5.68	5.46	3.79	2.96	4.21	5.97	5.49	4.67	XP_022820563.1(multidrug resistance protein 1-like isoform X1 [Spodoptera litura])
TRINITY_DN158747_c0_g1	0.0612627	-4.02885	2.78e-11	7e-09	yes	down	51.23	4.45235	39.22	36.9	39.54	53.56	51.22	86.94	5.09	1.26	1.81	5.52	1.97	1.79	8.16	1.9	8.3	6.38	11.84	1.45	1.11	1.47	3.76	8.44	5.44	XP_022820849.1(uncharacterized protein LOC111352537 [Spodoptera litura])
TRINITY_DN43584_c0_g3	0.00958587	-6.70488	2.81e-11	7.08e-09	yes	down	21.985	0.297647	33.76	25.95	13.88	20.47	20.96	16.89	0.1	0.1	0.08	0.1	0.01	0.04	0.2	2.31	0.2	0.02	0.09	0.01	0.07	0.09	0.66	0.71	0.27	XP_022815067.1(neutral ceramidase-like [Spodoptera litura])
TRINITY_DN62786_c0_g1	0.122108	-3.03377	2.87e-11	7.23e-09	yes	down	1094.69	190.266	1124.23	1081.01	1072.56	988.92	1171.45	1129.98	180.39	188.36	174.15	370.34	293.21	249.6	71.58	43.56	191.21	171.84	153.76	304.04	366.68	302.49	55.06	66.34	51.91	ARD71234.1(acyl-CoA binding protein [Spodoptera exigua])
TRINITY_DN42945_c0_g1	0.0187274	-5.73871	2.9e-11	7.29e-09	yes	down	22.61	0.00647059	36.4	32.97	0.85	24.43	6.66	34.35	0	0	0	0	0	0	0	0	0	0	0	0	0.11	0	0	0	0	XP_022817120.1(uncharacterized protein LOC111349980 isoform X1 [Spodoptera litura])
TRINITY_DN59525_c0_g1	0.0219093	-5.51232	2.91e-11	7.29e-09	yes	down	0.928333	0.0258824	0.73	1.99	0.51	0.5	0.62	1.22	0.04	0	0	0	0	0.07	0.04	0	0	0.09	0.08	0	0.08	0	0	0	0.04	XP_022822274.1(lipase member H-like [Spodoptera litura])
TRINITY_DN48665_c0_g1	0.0167786	-5.89723	2.91e-11	7.3e-09	yes	down	0.575	0.00294118	0.14	0.11	1.95	0.4	0.05	0.8	0	0	0	0	0	0	0	0	0	0	0	0.05	0	0	0	0	0	None
TRINITY_DN62060_c1_g1	0.143001	-2.80591	2.97e-11	7.42e-09	yes	down	85.995	17.0753	106.29	93.81	59.71	78.89	98.49	78.78	8.49	7.29	8.53	14.22	13.99	14.42	9.52	31.91	11.75	9.66	14.27	15.45	14.8	16.67	30.63	38.25	30.43	XP_022828930.1(venom dipeptidyl peptidase 4-like isoform X1 [Spodoptera litura])
TRINITY_DN43583_c0_g1	0.0441097	-4.50276	2.99e-11	7.46e-09	yes	down	9.57667	0.75	8.92	8.47	13.84	7.03	9.6	9.6	2.33	0.33	0.32	0.55	0.51	0	0.2	0.66	0.76	2.42	0.91	0.27	0.42	0.42	0.1	0.75	1.8	PCG77731.1(hypothetical protein B5V51_6420 [Heliothis virescens])
TRINITY_DN59090_c3_g6	0.0200702	-5.6388	3e-11	7.48e-09	yes	down	0.321667	0.00529412	0.22	0.08	0.51	0.4	0.24	0.48	0	0	0	0	0	0	0	0	0	0	0	0	0.02	0	0.02	0.05	0	None
TRINITY_DN57797_c0_g2	0.103498	-3.27232	3.11e-11	7.76e-09	yes	down	2.47833	0.322941	1.79	1.72	3.43	4.08	1.24	2.61	0.19	0.24	0.19	0.44	0.29	0.27	0.36	0.4	0.32	0.14	0.36	0.3	0.51	0.56	0.42	0.16	0.34	XP_022823098.1(uncharacterized protein LOC111354061 [Spodoptera litura])
TRINITY_DN62824_c6_g1	0.277246	-1.85076	3.15e-11	7.84e-09	yes	down	777.578	243.588	647.33	811.2	816.96	709.67	693.75	986.56	211.65	169.1	182.86	376.03	366.71	367.66	202.35	100.06	225.86	235.91	221.17	342.53	308.32	401.53	156.28	124.06	148.91	XP_013182993.1(PREDICTED: tropomyosin-2 isoform X12 [Amyelois transitella])
TRINITY_DN43797_c0_g1	0.0427737	-4.54713	3.2e-11	7.96e-09	yes	down	9.85167	0.590588	7.92	13.14	10.11	7.62	9.59	10.73	0.78	0.43	0.35	1.07	1.42	1.39	0.52	0.02	0.74	0.28	0.38	0.69	0.97	0.64	0.1	0.18	0.08	XP_022826845.1(uncharacterized protein LOC111356639 [Spodoptera litura])
TRINITY_DN58443_c8_g3	0.137357	-2.86399	3.42e-11	8.5e-09	yes	down	14.9467	3.00353	16.33	10.51	12.5	16.56	22.25	11.53	2.31	3.16	2.55	3.95	4.38	3.83	0.82	3.08	3.11	3.58	2.06	4.08	4.37	3.83	1.91	2.09	1.95	XP_022814180.1(UNC93-like protein [Spodoptera litura])
TRINITY_DN47995_c4_g2	0.0104364	-6.58224	3.45e-11	8.55e-09	yes	down	87.535	1.15059	23.93	13.62	353.54	57.58	40.73	35.81	0	0	0	1.31	0	0	0.65	1.32	0	1.58	4.69	3.08	2.17	4.04	0.72	0	0	None
TRINITY_DN57094_c0_g1	0.178084	-2.48937	3.49e-11	8.64e-09	yes	down	163.172	44.1941	173.25	202.83	151.63	135.73	157.13	158.46	90.78	76.48	77.29	29.49	32.37	30.29	23.1	26.49	68.27	70.13	69.37	29.11	31.9	29.33	18.58	27.71	20.61	XP_022827122.1(leukocyte surface antigen CD53-like [Spodoptera litura])
TRINITY_DN41537_c0_g1	0.0135462	-6.20597	3.49e-11	8.64e-09	yes	down	3.16833	0.0494118	3.12	1.68	1.26	1.37	4.44	7.14	0	0	0	0	0.08	0	0	0	0.17	0	0	0.35	0.24	0	0	0	0	BAG71410.1(cytochrome P450 9A9 [Spodoptera exigua])
TRINITY_DN63864_c4_g1	0.00453068	-7.78606	3.49e-11	8.64e-09	yes	down	102.205	0	97.89	131.89	66.43	111.88	83.39	121.75	0	0	0	0	0	0	0	0	0	0	0	0	0	0	0	0	0	XP_022821670.1(trypsin, alkaline C-like [Spodoptera litura])
TRINITY_DN60567_c1_g1	0.141149	-2.82471	3.51e-11	8.67e-09	yes	down	17.0983	3.72471	17.51	12.63	12.76	13.13	25.19	21.37	7.95	5.72	6.58	5.02	5.46	5.08	1.14	3.84	2.33	1.57	1.97	3.73	2.18	4.71	1.07	3.28	1.69	XP_022826154.1(saccharopine dehydrogenase-like oxidoreductase [Spodoptera litura])
TRINITY_DN56150_c5_g3	0.0184616	-5.75933	3.74e-11	9.23e-09	yes	down	9.08333	0.214118	3.55	8.14	18.77	10.67	7.63	5.74	0	0	0.22	0.31	0.63	0.38	0	0.29	0	0	0	0.19	0.54	0.65	0.32	0.11	0	None
TRINITY_DN57724_c1_g1	0.255012	-1.97136	3.91e-11	9.64e-09	yes	down	855.52	398.248	981.46	944.85	706.83	770.27	1044.62	685.09	240.93	302.41	284.02	399.72	392.3	393.08	157.08	138.24	495.57	448.9	499.02	624.22	649.37	728.53	227.72	467.31	321.79	XP_021186783.1(uncharacterized protein LOC110373762 [Helicoverpa armigera])
TRINITY_DN34288_c0_g1	0.0948278	-3.39855	4.08e-11	1e-08	yes	down	8.87667	1.24059	9	6.45	9	11.39	10.12	7.3	0.8	0.87	0.76	1.11	1.44	2.25	0.17	1.42	1.04	1.15	1.09	2.39	1.84	1.39	0.66	0.7	2.01	XP_022815495.1(tachykinins-like [Spodoptera litura])
TRINITY_DN38897_c1_g1	0.0118369	-6.40056	4.12e-11	1.01e-08	yes	down	0.603333	0.00823529	0.7	0.7	0.76	0.01	0.72	0.73	0	0	0	0	0	0	0	0.08	0	0	0	0.02	0	0	0	0	0.04	XP_022833197.1(potassium/sodium hyperpolarization-activated cyclic nucleotide-gated channel 1-like [Spodoptera litura])
TRINITY_DN57300_c4_g2	0.0923756	-3.43634	4.14e-11	1.02e-08	yes	down	111.587	14.2541	112.34	140.85	125.71	91.8	81.92	116.9	11.47	7.23	12.43	27.64	26.4	24.24	7.74	3.21	15.69	15.15	15.72	22.32	20.48	20.88	3.6	3.41	4.71	XP_022828002.1(regucalcin-like [Spodoptera litura])
TRINITY_DN60718_c1_g2	0.0207249	-5.59249	4.15e-11	1.02e-08	yes	down	0.741667	0.0123529	0.58	0.91	0.76	1.37	0.29	0.54	0	0	0	0	0	0	0	0	0	0	0	0.06	0	0	0	0.15	0	None
TRINITY_DN28956_c1_g2	0.0192189	-5.70133	4.25e-11	1.04e-08	yes	down	1.31167	0.0311765	1.16	0.96	1.6	2.23	1.18	0.74	0	0	0	0	0	0.03	0.1	0.03	0.1	0	0.07	0	0	0	0.03	0	0.17	None
TRINITY_DN62000_c0_g1	0.151901	-2.71879	4.52e-11	1.11e-08	yes	down	127.333	31.1535	141.89	78.11	87.69	132.98	216.06	107.27	35.24	39.76	42.21	10.22	10.74	18.09	5.62	41.78	46.05	39.38	43.63	17.29	15.44	20.13	58.59	44.25	41.19	XP_022832803.1(basement membrane-specific heparan sulfate proteoglycan core protein-like isoform X4 [Spodoptera litura])
TRINITY_DN63092_c5_g1	0.01712	-5.86817	4.55e-11	1.11e-08	yes	down	45.4333	1.03824	41.88	38.98	24.27	65.89	57.82	43.76	1.01	0.6	0.19	3.15	1.19	1.67	0.05	0.03	1.15	1.37	0.59	1.04	2.02	3.37	0.02	0.11	0.09	XP_022828344.1(juvenile hormone esterase-like [Spodoptera litura])
TRINITY_DN55718_c0_g1	0.11859	-3.07595	4.68e-11	1.14e-08	yes	down	12.5717	2.05	9.27	11.97	11.51	15.61	13.3	13.77	1.25	1.76	1.56	3.77	3.32	3.13	3.16	1.02	1.77	1.28	1.65	2.79	1.84	2.09	1.3	1.06	2.1	XP_022819439.1(uncharacterized protein LOC111351645 [Spodoptera litura])
TRINITY_DN51033_c0_g1	0.000915878	-10.0926	4.73e-11	1.15e-08	yes	down	11.355	0	15.25	34.36	3.09	4.33	2	9.1	0	0	0	0	0	0	0	0	0	0	0	0	0	0	0	0	0	XP_022823846.1(uncharacterized protein LOC111354551 [Spodoptera litura])
TRINITY_DN12553_c0_g2	42.6598	5.41481	4.96e-11	1.21e-08	yes	up	0.123333	7.45	0.17	0.04	0.04	0.22	0.03	0.24	3.2	4.35	5.29	10.43	9.26	8.82	6.67	11.04	5.73	4.88	4.19	8.83	8.27	7.45	8.01	12.71	7.52	XP_022830424.1(putative inactive cysteine synthase 2 [Spodoptera litura])
TRINITY_DN63206_c0_g2	0.149945	-2.73749	4.96e-11	1.21e-08	yes	down	20.17	7.05765	16.93	21.59	20.84	25.79	16.76	19.11	12.36	14.02	11.54	6.41	6.77	5.26	2.72	2.23	10.55	11.09	10.61	6.37	6.38	5.07	2.23	3.13	3.24	XP_022825104.1(sphingomyelin phosphodiesterase 1-like [Spodoptera litura])
TRINITY_DN48331_c0_g1	0.0266841	-5.22788	4.98e-11	1.21e-08	yes	down	9.76667	0.415294	15.45	7.32	2.26	11.27	12.16	10.14	2.08	1.08	0	0.65	0.34	0.3	0	0	0	0	0.38	1.2	0.7	0.33	0	0	0	XP_022818243.1(myrosinase 1-like isoform X2 [Spodoptera litura])
TRINITY_DN48875_c0_g1	0.022606	-5.46715	5.13e-11	1.25e-08	yes	down	1.445	0.0358824	1.46	1.61	0.94	1.49	1.69	1.48	0	0	0	0.08	0	0.25	0	0	0	0.1	0	0	0	0.18	0	0	0	None
TRINITY_DN59647_c0_g3	9.86339	3.30208	5.19e-11	1.26e-08	yes	up	2.69167	38.3206	2.55	3.8	1.69	1.72	2.23	4.16	36.34	28	40.23	40.83	44.33	44.44	32.81	26.71	37.1	47.2	44.06	54.51	61.45	46.03	20.43	22.56	24.42	XP_022835079.1(1-acyl-sn-glycerol-3-phosphate acyltransferase beta-like [Spodoptera litura])
TRINITY_DN60421_c2_g4	115.376	6.8502	5.22e-11	1.26e-08	yes	up	0.228333	39.0741	0	0.2	0.56	0.09	0.42	0.1	39.09	39.66	36.76	58.46	50.95	72.99	16.48	8.07	53.93	33.74	42.51	68.02	57.52	56.22	10.02	10.14	9.7	None
TRINITY_DN4851_c0_g1	0.0243093	-5.36235	5.29e-11	1.28e-08	yes	down	1.79	0.0523529	1.97	1.62	2.22	1.45	0.78	2.7	0.07	0	0	0	0.06	0	0.06	0.23	0	0.07	0	0	0.13	0	0	0.07	0.2	XP_021189795.1(uncharacterized protein LOC110375845 [Helicoverpa armigera])
TRINITY_DN49799_c3_g2	0.182267	-2.45588	5.62e-11	1.36e-08	yes	down	23.8033	6.08176	24.87	26.5	18.42	20.85	24.89	27.29	5.43	4.58	5.28	8.75	7.61	7.14	3.33	4.54	6.02	6.69	5.37	8.17	8.63	7.46	4.58	5.92	3.89	XP_022817254.1(uncharacterized protein LOC111350066 [Spodoptera litura])
TRINITY_DN62862_c0_g2	0.238416	-2.06845	5.84e-11	1.41e-08	yes	down	81.7433	30.0429	85.32	88.4	90.36	77.49	70.85	78.04	41.46	33.25	43.7	33.87	40.28	30.67	14.28	20.53	32.86	28.72	25.47	30.31	26.56	24.12	22.72	33.4	28.53	XP_022818893.1(uncharacterized protein LOC111351287 [Spodoptera litura])
TRINITY_DN51681_c0_g2	0.00335993	-8.21735	5.86e-11	1.41e-08	yes	down	1.41667	0	2.19	0.75	0.37	1.17	2.09	1.93	0	0	0	0	0	0	0	0	0	0	0	0	0	0	0	0	0	None
TRINITY_DN56639_c3_g1	0.0223055	-5.48645	5.96e-11	1.44e-08	yes	down	8.64333	0.243529	8.45	5.47	8.71	8.4	9.73	11.1	0	0.22	0	0.4	1.04	0	0	0.19	0	0	0.7	0.74	0	0.42	0	0.43	0	None
TRINITY_DN63775_c1_g1	0.142767	-2.80827	6.11e-11	1.47e-08	yes	down	92.4717	17.9994	108.46	68.37	98.87	88.19	123.12	67.82	8.94	10.09	9.41	19.99	21.48	17.89	15.5	46.85	13.72	9.86	12.77	13.37	13.37	10.31	26.93	27.34	28.17	XP_022816193.1(proline-rich extensin-like protein EPR1 [Spodoptera litura])
TRINITY_DN59380_c0_g2	0.0875574	-3.51363	6.17e-11	1.48e-08	yes	down	5.06333	3.11588	4.7	3.39	6.57	4.35	9.04	2.33	0.31	0.13	0.27	0.69	0.73	1.63	5.97	6.35	0.49	2.99	4.32	0.77	8.48	10.83	0.68	6.28	2.05	XP_022814427.1(uncharacterized protein LOC111348150 [Spodoptera litura])
TRINITY_DN58308_c6_g1	0.222518	-2.168	6.2e-11	1.49e-08	yes	down	56.3117	17.1771	39.79	51.06	51.01	38.69	51.47	105.85	17.26	10.25	10.62	13.03	12.09	11.15	19.06	16.95	22.09	22.32	29.44	16.01	12.55	14.9	25.69	19.08	19.52	XP_022832697.1(protein henna isoform X1 [Spodoptera litura])
TRINITY_DN18574_c0_g1	0.0153444	-6.02614	6.22e-11	1.49e-08	yes	down	18.5833	0.234706	29.76	16.85	32.34	26.17	1.56	4.82	0	0	0	0	0	0	2	0	0	0	0	0	0	0	0	0	1.99	None
TRINITY_DN61851_c0_g1	0.285529	-1.80829	6.29e-11	1.51e-08	yes	down	65.0317	26.3365	65.88	59.98	55.83	72.89	73.83	61.78	26.62	26.83	28.52	27.34	30.37	28.57	10.68	17.47	39.14	29.4	35.3	30.53	29.21	30.99	18.38	18.93	19.44	XP_022819419.1(sodium- and chloride-dependent GABA transporter ine isoform X2 [Spodoptera litura])
TRINITY_DN54783_c0_g1	0.28984	-1.78667	6.4e-11	1.53e-08	yes	down	265.445	111.426	231.43	305.58	282.89	212.79	268.15	291.83	140.65	146	146.26	110.62	131.62	122.32	90.91	63.59	122.31	127.6	125.65	116.62	119.55	119.63	78.5	68.29	64.12	XP_022823322.1(S-adenosylmethionine decarboxylase proenzyme [Spodoptera litura])
TRINITY_DN58586_c0_g1	441.78	8.78718	6.79e-11	1.62e-08	yes	up	0.618333	330.179	1.2	0.55	0.43	0.23	0.25	1.05	141.65	107	125.5	201.03	271.96	150.18	1122.38	26.75	140.52	152.66	183.24	130.23	154.53	153.77	364.73	706.59	1480.33	XP_022830990.1(collagenase-like [Spodoptera litura])
TRINITY_DN59874_c2_g2	0.00486078	-7.6846	7.04e-11	1.68e-08	yes	down	11.2267	0.0811765	7.72	9.04	1.51	3.96	28.64	16.49	0.03	0	0	0	0.05	0	0.06	0.31	0.05	0	0	0	0	0.03	0.36	0.2	0.29	XP_022837196.1(nose resistant to fluoxetine protein 6-like [Spodoptera litura])
TRINITY_DN51070_c0_g2	9.4368	3.2383	7.05e-11	1.68e-08	yes	up	0.78	10.2329	0.64	0.9	0.65	1.01	0.63	0.85	12.45	13.43	13.84	5.97	6.77	6.49	14.29	7.37	9.3	11.11	10.54	5.9	5.6	6.99	12.18	15.23	16.5	XP_021192556.1(multidrug resistance protein homolog 49-like [Helicoverpa armigera])
TRINITY_DN45487_c0_g1	0.0387763	-4.68868	7.55e-11	1.8e-08	yes	down	11.2867	0.596471	13.44	8.33	13	8.98	12.28	11.69	0.23	0.43	0.63	0.49	0.99	0.98	1.06	0.09	0.11	0.79	0.22	0.98	0.1	2.12	0	0.31	0.61	None
TRINITY_DN60002_c0_g4	0.0219452	-5.50995	7.58e-11	1.8e-08	yes	down	9.55333	0.0941176	14.36	13.8	1.52	2.78	10.69	14.17	0	0	1.6	0	0	0	0	0	0	0	0	0	0	0	0	0	0	None
TRINITY_DN52515_c0_g1	0.0260465	-5.26277	7.58e-11	1.8e-08	yes	down	2.40667	0.0847059	2.11	2.3	3.38	1.81	2.46	2.38	0.11	0.11	0.1	0	0	0	0.11	0	0.45	0.2	0.08	0.03	0.05	0	0.05	0	0.15	XP_022818819.1(uncharacterized protein LOC111351250 isoform X1 [Spodoptera litura])
TRINITY_DN35056_c0_g1	0.132005	-2.92134	7.65e-11	1.82e-08	yes	down	9.385	1.73529	10.66	5.33	6.67	12.36	12.96	8.33	1.29	1.29	1.59	1.27	1.2	2.45	0.17	2.92	1.48	1.48	1.75	1.62	1.29	1.81	2.29	2.66	2.94	XP_022823985.1(putative fatty acyl-CoA reductase CG5065 [Spodoptera litura])
TRINITY_DN51100_c0_g1	0.0237974	-5.39305	7.66e-11	1.82e-08	yes	down	1.22	0.0158824	1.25	0.85	2.26	0.88	1.37	0.71	0	0	0	0	0	0	0	0	0.13	0.14	0	0	0	0	0	0	0	None
TRINITY_DN60849_c6_g6	0.00492187	-7.66658	7.7e-11	1.82e-08	yes	down	2.37333	0	3.3	0.86	2.57	1.74	3.2	2.57	0	0	0	0	0	0	0	0	0	0	0	0	0	0	0	0	0	None
TRINITY_DN59465_c1_g1	0.143295	-2.80294	7.78e-11	1.84e-08	yes	down	16.5967	3.87176	24.96	24.82	12.03	15.35	10.93	11.49	2.53	3.06	3.4	5.13	5.37	5.5	0.77	2.13	4.17	3.2	4.65	4.3	6.57	7.23	1.67	3.24	2.9	PCG69528.1(hypothetical protein B5V51_3986 [Heliothis virescens])
TRINITY_DN61070_c0_g1	7.50574	2.90799	7.9e-11	1.87e-08	yes	up	1.665	17.4459	1.59	1.29	2.28	1.89	1.66	1.28	11.05	8.87	11.46	19	20.47	21.44	18.46	18.56	15.79	14.28	14.53	20.47	18.57	19.88	18.8	23.5	21.45	XP_022821323.1(division abnormally delayed protein [Spodoptera litura])
TRINITY_DN51634_c0_g1	0.259942	-1.94374	7.99e-11	1.89e-08	yes	down	49.3583	18.6218	43.77	30.82	57.29	59.58	53.48	51.21	27.24	28.44	29.53	13.73	13.09	11.42	10.72	15.13	26.65	24.47	26.74	13.57	13.71	11.87	15.31	16.8	18.15	XP_022825131.1(3-hydroxyisobutyryl-CoA hydrolase, mitochondrial [Spodoptera litura])
TRINITY_DN60950_c0_g1	0.00234164	-8.73826	8.03e-11	1.89e-08	yes	down	1708.24	5.19824	1791.52	2208.28	1164.22	2109.64	1601.27	1374.54	0.38	0.48	1.98	0.32	0.14	0.59	27.52	1.03	0.47	0.29	0.39	0.38	0.22	0.74	3.42	20.33	29.69	ABW98673.1(chitin-binding protein [Spodoptera exigua])
TRINITY_DN16088_c0_g1	0.00565975	-7.46505	8.09e-11	1.91e-08	yes	down	1.70167	0	1.27	1.62	2.13	2.37	1.75	1.07	0	0	0	0	0	0	0	0	0	0	0	0	0	0	0	0	0	None
TRINITY_DN56213_c9_g5	16.0505	4.00454	8.44e-11	1.98e-08	yes	up	1.97	39.8088	2.15	2.56	1.81	2.32	1.34	1.64	43.25	31.39	39.93	61.75	66.16	60.44	25.77	13.81	40.06	38.56	47.37	54.09	45.08	48.23	21.05	16.14	23.67	None
TRINITY_DN51977_c0_g1	0.0274072	-5.1893	8.47e-11	1.99e-08	yes	down	0.191667	0.00588235	0.33	0.12	0.28	0.18	0.12	0.12	0	0	0.03	0	0	0	0	0.02	0	0	0	0.02	0	0.03	0	0	0	None
TRINITY_DN58499_c0_g1	0.0117141	-6.41561	8.49e-11	1.99e-08	yes	down	10.3633	0.164118	6.66	13.4	8.97	12.7	11.94	8.51	0.17	0.27	0.16	0	0.05	0.04	0.34	0	0	0	0	0	0.05	0	1.05	0.46	0.2	ASO98043.1(cytochrome p450 CYP4M17 [Spodoptera exigua])
TRINITY_DN57199_c0_g1	0.0547216	-4.19175	8.5e-11	1.99e-08	yes	down	18.825	1.54824	12.87	14.28	21.01	22.88	16.56	25.35	2.46	1.09	3.56	1.46	0.74	1.9	0.22	0.2	4.71	1.87	1.78	2.33	1.67	1.58	0.37	0.14	0.24	XP_022816127.1(cytochrome P450 4V2-like [Spodoptera litura])
TRINITY_DN62768_c0_g1	0.290137	-1.78519	8.75e-11	2.05e-08	yes	down	725.43	306.325	821.22	782.26	657.66	668.73	761.9	660.81	344.68	337.35	363.89	391.39	388.7	371.45	140.2	164.54	407.66	363.4	408.38	324.14	322.23	378.31	161.13	174.87	165.2	XP_022826560.1(V-type proton ATPase catalytic subunit A [Spodoptera litura])
TRINITY_DN34229_c0_g1	0.0102983	-6.60145	8.83e-11	2.07e-08	yes	down	131.018	1.16824	147.51	118.63	94.73	119.22	151.57	154.45	0	0	3.75	0	0	0	5.46	10.65	0	0	0	0	0	0	0	0	0	XP_022825069.1(uncharacterized protein LOC111355420 [Spodoptera litura])
TRINITY_DN57194_c0_g1	0.0345064	-4.85699	8.96e-11	2.09e-08	yes	down	13.9033	0.682941	14.51	9.98	15.59	14.2	13.22	15.92	0.74	0.52	0.79	1.23	1.35	1.37	0.11	0.16	1.04	0.57	0.71	1.11	1.13	0.67	0.09	0	0.02	XP_022817236.1(apyrase-like isoform X1 [Spodoptera litura])
TRINITY_DN5793_c0_g1	0.0105983	-6.56003	8.97e-11	2.09e-08	yes	down	7.245	0.0935294	8.34	6.03	5.1	4.1	15.9	4	0	0	0	0.51	0.06	0.41	0.06	0	0	0	0	0.29	0.26	0	0	0	0	XP_022816425.1(proteoglycan 4-like [Spodoptera litura])
TRINITY_DN61847_c1_g1	0.142512	-2.81085	9e-11	2.1e-08	yes	down	20.5633	4.35235	20.36	27.25	20.34	21.44	21.36	12.63	4.25	4.68	4.32	7.08	5.93	6.32	6.18	2.65	2.94	2.42	3.41	4.64	5.39	5.3	3.01	2.87	2.6	XP_022814675.1(SID1 transmembrane family member 2-like [Spodoptera litura])
TRINITY_DN140986_c0_g1	0.017746	-5.81636	9.23e-11	2.15e-08	yes	down	299.412	7.05941	203.9	519.07	244.44	365.7	243.63	219.73	0.91	2.14	0.62	1.95	2	2.34	25.52	20.57	1.48	1.15	1.57	2.49	2.06	2.01	18.22	15.28	19.7	None
TRINITY_DN45238_c1_g1	0.0286394	-5.12586	9.27e-11	2.16e-08	yes	down	2.31667	0.0711765	2	2.86	3.39	1.19	1.9	2.56	0	0	0	0.17	0.35	0	0	0	0	0	0	0.15	0.18	0	0.18	0.18	0	None
TRINITY_DN44303_c0_g1	0.0196751	-5.66748	9.37e-11	2.18e-08	yes	down	0.326667	0.00235294	0.48	0.15	0	0.44	0.41	0.48	0	0.04	0	0	0	0	0	0	0	0	0	0	0	0	0	0	0	None
TRINITY_DN62446_c3_g3	0.108158	-3.20879	9.48e-11	2.2e-08	yes	down	55.8	8.89647	48.8	43.64	44.31	55.58	56.06	86.41	5.37	8.16	5.46	8.63	9.94	16.44	0.8	7.76	8.16	6.57	9.97	15.55	13.61	10.14	8.55	9.54	6.59	XP_022823201.1(uncharacterized protein LOC111354141 [Spodoptera litura])
TRINITY_DN51524_c0_g2	22.5224	4.49329	9.48e-11	2.2e-08	yes	up	0.533333	18.0188	0.5	0.6	0.78	0.34	0.19	0.79	22.24	22.15	24.12	12.35	13.65	27.13	11.21	7.67	21.04	26.53	26.81	26.18	21.35	21.43	9.4	6.25	6.81	None
TRINITY_DN59606_c0_g1	0.23818	-2.06988	9.52e-11	2.2e-08	yes	down	202.083	66.8694	188	150.68	230.12	227.85	205.33	210.52	119.14	126.74	125.92	36.31	36.9	36.86	32.31	54.77	101.61	92.64	90.63	38.5	35.5	34.6	59.15	58.62	56.58	XP_022827461.1(nucleolar protein 14 homolog [Spodoptera litura])
TRINITY_DN1029_c0_g1	0.00538858	-7.53588	9.68e-11	2.24e-08	yes	down	1.52167	0	1.65	1.12	1.34	2.77	1.42	0.83	0	0	0	0	0	0	0	0	0	0	0	0	0	0	0	0	0	XP_021194619.1(uncharacterized protein LOC110379324 isoform X7 [Helicoverpa armigera])
TRINITY_DN62626_c2_g1	7.1958	2.84716	9.77e-11	2.26e-08	yes	up	3.68	38.2353	3.6	1.65	3.88	4.96	4.93	3.06	28.61	32.43	31.56	35.99	34.72	48.47	6.32	38.22	49.36	41.19	46.48	47.77	35.1	63.84	37.59	40.37	31.98	XP_014371019.1(PREDICTED: serine/threonine-protein kinase NLK isoform X2 [Papilio machaon])
TRINITY_DN60362_c3_g1	0.0246636	-5.34147	9.81e-11	2.26e-08	yes	down	1.515	0.01	4.66	0.16	1.03	0.86	1.31	1.07	0	0	0	0	0	0	0	0	0	0	0	0	0	0	0	0.17	0	None
TRINITY_DN62501_c2_g2	0.106757	-3.2276	9.87e-11	2.27e-08	yes	down	13.7983	2.02529	11.35	11.09	11.78	11.05	22.77	14.75	0.84	0.57	0.83	2.93	1.7	1.37	2.12	2.9	1.38	0.96	1.5	2.7	2.04	2.53	2.28	4.73	3.05	XP_022818710.1(caspase-1-B-like [Spodoptera litura])
TRINITY_DN120063_c0_g1	0.00374169	-8.0621	9.94e-11	2.29e-08	yes	down	20.5367	0	23.79	48.92	14.1	14.51	9.49	12.41	0	0	0	0	0	0	0	0	0	0	0	0	0	0	0	0	0	None
TRINITY_DN52349_c0_g1	0.0130087	-6.26437	1.01e-10	2.33e-08	yes	down	12.4033	0.222353	14.7	24.6	8.66	5.32	8.73	12.41	0	0	0.14	0	0.52	0	0.39	0.3	0.07	0	0.15	0.06	0	0.07	0.19	1.13	0.76	XP_022824556.1(pancreatic triacylglycerol lipase-like [Spodoptera litura])
TRINITY_DN58019_c12_g3	0.0480573	-4.3791	1.04e-10	2.4e-08	yes	down	41.3533	2.84471	42.51	50.23	23.27	24.05	68.92	39.14	2.47	1.99	3.1	4.52	6.5	3.79	0.07	1.17	2.19	2.03	0.71	8.56	0.37	1.89	1.45	5.86	1.69	None
TRINITY_DN56534_c3_g2	193.282	7.59456	1.07e-10	2.45e-08	yes	up	0	15.1935	0	0	0	0	0	0	5.36	8.43	11.55	17.35	19.36	12.64	14.87	10.42	19.67	17.41	19.23	14.05	24.15	18.98	7.59	18.13	19.1	XP_022824786.1(uncharacterized family 31 glucosidase KIAA1161-like [Spodoptera litura])
TRINITY_DN61069_c1_g2	0.00559296	-7.48217	1.07e-10	2.46e-08	yes	down	52.3067	0.425882	59.55	45.02	42.13	47.9	60.01	59.23	0.02	0.01	0.07	0.08	0.09	0	0.37	0.95	0.1	0.04	0.1	0.08	0.03	0.01	0.48	2.81	2	XP_022814064.1(O-acyltransferase like protein-like [Spodoptera litura])
TRINITY_DN62644_c2_g1	0.073629	-3.76358	1.07e-10	2.46e-08	yes	down	27.5767	2.98647	24.59	36.95	25.93	22.25	38.71	17.03	6.48	3.84	6.65	4.97	3.61	4.96	0.96	1.78	3.78	2.47	0.81	2.77	1.73	2.16	1.89	0.25	1.66	None
TRINITY_DN58762_c0_g1	0.192738	-2.37528	1.09e-10	2.49e-08	yes	down	227.043	115.399	230.62	243.03	249.12	236.65	212.15	190.69	236.2	242.21	274.59	38.35	41.16	36.18	79.74	119	181.62	161.65	166.11	29.53	35.9	35.05	91.25	99.17	94.07	XP_022832389.1(uncharacterized protein LOC111360618 isoform X1 [Spodoptera litura])
TRINITY_DN80444_c0_g1	0.0147065	-6.0874	1.13e-10	2.57e-08	yes	down	5.25	0.0929412	3.15	4.34	2.79	1.88	9.13	10.21	0	0	0	0	0	0	0.12	0.22	0	0	0	0	0	0.12	0	1	0.12	None
TRINITY_DN60334_c0_g1	0.269966	-1.88915	1.14e-10	2.6e-08	yes	down	737.048	299.641	716.2	662.19	675.5	793.87	774.62	799.91	354.96	382.97	379.5	385.63	343.3	343.54	104.94	134.64	385.93	360.49	402.32	358.81	339.96	371.47	139.64	161.55	144.25	XP_022815239.1(V-type proton ATPase subunit E [Spodoptera litura])
TRINITY_DN62739_c1_g3	0.0164091	-5.92936	1.15e-10	2.63e-08	yes	down	4.11167	0.0564706	0.58	6.38	4.4	10.19	1.56	1.56	0	0	0	0	0	0	0	0.96	0	0	0	0	0	0	0	0	0	None
TRINITY_DN54284_c0_g3	0.0416826	-4.58441	1.17e-10	2.66e-08	yes	down	17.69	0.981176	14.23	14.21	28.05	14.5	15.31	19.84	0.34	0.18	0.13	2.21	1.41	1.74	1.03	1.91	0.27	0.14	0.05	1.5	1.63	1.2	0.59	1.26	1.09	None
TRINITY_DN59154_c2_g1	0.0168424	-5.89176	1.19e-10	2.7e-08	yes	down	5072.36	129.956	3878.07	3765.15	2736.1	2615.64	8317.86	9121.35	61.15	58.86	43.41	51.06	36.57	8.04	124.94	167.12	27.79	9.78	36.9	16.83	78.46	50.82	58.98	1264.26	114.28	XP_022834181.1(uncharacterized protein LOC111361950 isoform X3 [Spodoptera litura])
TRINITY_DN3706_c0_g1	0.0184746	-5.75832	1.19e-10	2.71e-08	yes	down	0.986667	0.0170588	1.04	1.25	1.4	1.37	0.46	0.4	0	0	0	0	0	0	0	0	0	0	0	0	0	0	0	0	0.29	None
TRINITY_DN59090_c3_g4	0.0498622	-4.32591	1.2e-10	2.72e-08	yes	down	237.823	16.6524	250	236.75	257.28	291.91	168.62	222.38	4.81	3.32	3.54	11.38	8.21	7.27	16.04	49.72	7.38	7.48	7.01	5.5	7.69	6.49	42.37	38.87	56.01	XP_022816544.1(endocuticle structural glycoprotein SgAbd-2-like [Spodoptera litura])
TRINITY_DN163302_c0_g1	0.0155841	-6.00379	1.21e-10	2.74e-08	yes	down	0.486667	0.00764706	0.28	0.63	0.05	1.54	0.39	0.03	0	0	0	0	0	0	0	0	0	0.07	0.03	0	0	0	0	0	0.03	None
TRINITY_DN48228_c1_g1	0.00656238	-7.25156	1.23e-10	2.78e-08	yes	down	1.27833	0	0.9	2.02	1.27	1.11	1.25	1.12	0	0	0	0	0	0	0	0	0	0	0	0	0	0	0	0	0	XP_022821658.1(trypsin, alkaline C-like [Spodoptera litura])
TRINITY_DN56113_c6_g1	0.273834	-1.86863	1.23e-10	2.79e-08	yes	down	100.602	39.3835	96.03	82.43	117.41	88.24	101.06	118.44	44.06	49.65	44.69	37.67	32.42	28	44.22	35.88	46.76	41.07	41.9	36.42	37.74	31.26	35.77	38.08	43.93	XP_022818264.1(transmembrane protein 14C [Spodoptera litura])
TRINITY_DN48837_c1_g2	0.0154678	-6.01459	1.25e-10	2.83e-08	yes	down	14.3117	0.0941176	12.19	8.64	0	1.47	41.54	22.03	0	0	0	0	0	0	0	0	0	0	0	0	0	0	0	0	1.6	None
TRINITY_DN51489_c0_g1	0.0865345	-3.53058	1.27e-10	2.86e-08	yes	down	147.227	18.7959	139.62	81.74	296.89	35.74	78.18	251.19	8.09	78.69	35.18	6.49	9.4	7.96	13.25	11.55	25.3	37.53	10.47	9.57	8.19	6.36	17.65	22.88	10.97	XP_022821062.1(cytochrome b5-like [Spodoptera litura])
TRINITY_DN65111_c0_g1	0.0179095	-5.80313	1.27e-10	2.86e-08	yes	down	4.715	0.1	3.74	4.45	10.95	3.41	2.32	3.42	0	0	0	0	0	0.11	0	0.12	0	0	0	0.68	0	0	0.39	0.4	0	None
TRINITY_DN60894_c1_g2	0.0253674	-5.30088	1.28e-10	2.88e-08	yes	down	0.481667	0.0135294	0.53	0.22	0.33	0.35	0.65	0.81	0	0	0	0	0	0	0	0.05	0	0.03	0	0	0	0.03	0.09	0	0.03	None
TRINITY_DN60205_c6_g1	0.0127093	-6.29797	1.29e-10	2.9e-08	yes	down	3.07333	0.0464706	2.14	4.06	0	2.44	5.82	3.98	0	0	0.18	0	0	0.08	0	0	0	0	0	0	0	0	0.35	0.18	0	None
TRINITY_DN50275_c1_g2	0.0665243	-3.90997	1.3e-10	2.93e-08	yes	down	26.145	2.42529	19.32	33.82	21.94	19.45	39.87	22.47	4.51	4.66	5.68	4.61	4.32	3.06	0.79	0.74	2.88	1.25	1.36	0.97	2.1	0.83	1.53	0.57	1.37	None
TRINITY_DN3310_c0_g1	0.0121074	-6.36796	1.32e-10	2.97e-08	yes	down	9.08833	0.139412	14.14	12.01	6.9	6.34	9.46	5.68	0	0	0	0	0	0	0.36	0.86	0.1	0	0	0	0	0.19	0.47	0.39	0	None
TRINITY_DN58982_c3_g4	0.00304417	-8.35973	1.34e-10	3.01e-08	yes	down	225.86	0.941765	221.33	240.87	179.69	189.35	309.06	214.86	0.14	0.04	0.13	0.15	0	0.2	0.79	1.59	0	0.07	0.06	0.17	0	0.06	1.96	8.34	2.31	XP_022825712.1(trypsin, alkaline C-like [Spodoptera litura])
TRINITY_DN60885_c1_g1	5.52735	2.46659	1.35e-10	3.03e-08	yes	up	20.965	160.411	23.19	16.24	15.43	20.1	30.11	20.72	182.91	157.73	242.92	154.65	170.4	155.9	29.31	89.35	220.3	241.97	259.08	194.38	153.48	185.95	96.53	96.65	95.48	XP_022826385.1(peroxidase-like [Spodoptera litura])
TRINITY_DN63993_c12_g1	0.0239893	-5.38146	1.42e-10	3.18e-08	yes	down	7.7	0.255882	13.18	7.79	8.54	3.49	4.16	9.04	0.02	0.01	0.04	0.35	0.34	0.59	0.06	0.96	0.01	0.07	0.05	0.44	0.33	0.43	0.22	0.11	0.32	XP_022815519.1(uncharacterized protein LOC111348841 [Spodoptera litura])
TRINITY_DN56114_c2_g1	0.00317611	-8.29852	1.43e-10	3.19e-08	yes	down	5.07833	0	12.25	6.09	1.43	4.62	1.62	4.46	0	0	0	0	0	0	0	0	0	0	0	0	0	0	0	0	0	None
TRINITY_DN59273_c7_g7	0.00230851	-8.75882	1.46e-10	3.25e-08	yes	down	330.21	0.972941	357.82	497.9	273.68	254.76	283.81	313.29	0.06	0.06	0.14	0	0.05	0	6.03	1.58	0.05	0	0.09	0.08	0.09	0.06	2.28	3.64	2.33	XP_022832027.1(collagenase-like [Spodoptera litura])
TRINITY_DN63560_c2_g1	0.252327	-1.98663	1.56e-10	3.48e-08	yes	down	8.76667	4.15353	8.69	8.96	7.03	7.88	10.77	9.27	5.73	4.81	6.21	3.15	2.82	3.6	1.28	2.31	8.03	4.89	6.81	4.25	3.2	3.43	3.65	3.52	2.92	XP_022830714.1(72 kDa inositol polyphosphate 5-phosphatase isoform X2 [Spodoptera litura])
TRINITY_DN58563_c0_g1	0.0150247	-6.05652	1.57e-10	3.5e-08	yes	down	52.6583	0.828824	16.22	8.98	231.19	31.6	20.16	7.8	0	0.61	0	2.72	0	1.55	0	2.84	0	0	0.65	0.51	2.39	2.23	0.59	0	0	None
TRINITY_DN55506_c0_g1	0.0731209	-3.77357	1.59e-10	3.54e-08	yes	down	41.2233	4.08	42.48	44.4	38.47	30.17	46.69	45.13	1.37	1.07	1.66	3.07	2.86	2.8	11.28	7.29	2.13	1.29	1.64	2.62	3.28	3.35	8.02	7.93	7.7	XP_022820785.1(caspase-1-like [Spodoptera litura])
TRINITY_DN23619_c0_g1	0.144318	-2.79268	1.61e-10	3.57e-08	yes	down	64.73	13.6224	67.14	62.25	53.48	74.51	64.6	66.4	17.26	15.67	17.86	11.18	12.32	20.61	3.68	13.04	12.87	12.89	15.12	13.78	16.63	22.57	7.59	8.5	10.01	None
TRINITY_DN57616_c6_g3	0.00599709	-7.38152	1.63e-10	3.63e-08	yes	down	0.68	0	0.77	0.21	0.62	0.76	0.86	0.86	0	0	0	0	0	0	0	0	0	0	0	0	0	0	0	0	0	None
TRINITY_DN55004_c0_g1	0.151178	-2.72568	1.66e-10	3.68e-08	yes	down	18.2017	3.84294	17.79	20.53	14.2	15.67	24.1	16.92	1.75	1.66	2.09	4.67	3.93	4.33	4.08	2.86	2.8	3.55	4.07	4.88	4.08	5.42	2.99	6	6.17	XP_022821893.1(phospholipid scramblase 1 [Spodoptera litura])
TRINITY_DN57301_c7_g2	40.4523	5.33815	1.68e-10	3.73e-08	yes	up	26.5967	1606.7	37.22	19.86	28.95	16.64	39.68	17.23	2141.13	2533.43	3131.96	542.16	293.34	314.74	678.06	560.56	4613.81	3778.31	4297.43	999.25	1169.01	694.79	428.24	429.5	708.23	XP_022826615.1(macrophage mannose receptor 1-like [Spodoptera litura])
TRINITY_DN20509_c0_g1	0.0262926	-5.2492	1.69e-10	3.75e-08	yes	down	33.8133	0.667059	47.97	25.36	56.94	13.19	36.26	23.16	0	0	0	0	0	0	0	0	0	0	0	0	0	0	5.64	5.7	0	XP_022814447.1(pupal cuticle protein 36-like [Spodoptera litura])
TRINITY_DN60291_c2_g3	0.00587126	-7.41211	1.71e-10	3.78e-08	yes	down	457.247	3.44765	397.95	475.93	309.05	489.88	433.61	637.06	0	0	0.62	0.29	0.92	0	16.39	8.47	0	1.04	0.68	0	0.94	0.6	8.7	10.49	9.47	XP_022826631.1(brachyurin-like [Spodoptera litura])
TRINITY_DN52588_c1_g1	5.94122	2.57076	1.72e-10	3.81e-08	yes	up	3.71667	31.2135	3.55	3.11	2.51	6.29	4.05	2.79	21.97	21.02	20.58	28.66	30.35	33.31	21.96	36.97	29.31	27.66	26.59	36.46	31.68	37.8	39.74	45.56	41.01	XP_022820804.1(integrin beta-PS-like [Spodoptera litura])
TRINITY_DN87175_c0_g1	0.0218646	-5.51526	1.76e-10	3.88e-08	yes	down	0.256667	0.00235294	0.3	0.16	0.82	0.07	0.07	0.12	0	0	0	0	0	0	0	0	0	0	0	0	0.04	0	0	0	0	None
TRINITY_DN56962_c0_g3	38.1896	5.25511	1.77e-10	3.91e-08	yes	up	0.02	1.21765	0.04	0.01	0.02	0.02	0.02	0.01	1.31	1.19	1.21	0.4	0.37	0.66	1.17	1.53	1.21	1.06	1.29	0.56	0.58	0.5	2.77	2.36	2.53	XP_022828784.1(irregular chiasm C-roughest protein-like [Spodoptera litura])
TRINITY_DN57807_c0_g1	0.164454	-2.60424	1.78e-10	3.92e-08	yes	down	8.92	2.16529	7.86	7.71	4.51	8.27	16.1	9.07	3.26	2.69	1.83	1.56	1.54	1.43	0.66	1.59	4.5	2.97	3.02	2.46	2.22	1.99	1.07	1.44	2.58	XP_022831091.1(uncharacterized protein LOC111359710 [Spodoptera litura])
TRINITY_DN62894_c13_g1	0.18648	-2.42291	1.79e-10	3.93e-08	yes	down	1077.57	287.264	1084.3	958.26	1280.85	914.75	893.94	1333.3	230.96	209.29	273.67	417.5	438.5	551.14	123.34	125.93	319.41	252.27	316.61	449.05	351.11	528.18	102.29	111.49	82.74	XP_022837919.1(myosin heavy chain, muscle isoform X18 [Spodoptera litura])
TRINITY_DN7069_c0_g1	0.0150849	-6.05075	1.79e-10	3.93e-08	yes	down	5.47833	0.115294	6.89	6.93	1.34	7.02	6.65	4.04	0.33	0.06	0	0	0.03	0	0.14	0.41	0.06	0	0.03	0.08	0	0	0.17	0.44	0.21	XP_022832024.1(microvitellogenin-like [Spodoptera litura])
TRINITY_DN62739_c1_g2	0.00545626	-7.51787	1.81e-10	3.98e-08	yes	down	2.945	0	4.62	1.53	1.56	1.81	5.08	3.07	0	0	0	0	0	0	0	0	0	0	0	0	0	0	0	0	0	None
TRINITY_DN54888_c4_g7	0.0257069	-5.2817	1.82e-10	4e-08	yes	down	0.423333	0.00470588	0.8	0.32	0.15	0.36	0.6	0.31	0	0	0	0	0	0	0	0	0	0	0	0	0.08	0	0	0	0	None
TRINITY_DN63334_c4_g1	3.10333	1.63382	1.85e-10	4.06e-08	yes	up	78.5583	408.285	75.09	84.27	45.65	88.97	108.22	69.15	406.14	380.71	459.55	266.29	268.27	340.64	233.8	328.89	524.51	627.75	654.33	388.62	367.98	448.22	428.8	476.81	339.54	XP_022814518.1(prosaposin [Spodoptera litura])
TRINITY_DN61232_c0_g2	0.26853	-1.89684	1.9e-10	4.15e-08	yes	down	231.805	90.8847	208.75	174.3	245.67	268.19	233.94	259.98	110.77	104.24	116.11	90.12	94.05	88.16	28.16	59.29	130.69	105.73	114.13	111.15	103.82	95.71	58.19	75.05	59.67	XP_022816341.1(V-type proton ATPase 21 kDa proteolipid subunit-like [Spodoptera litura])
TRINITY_DN29960_c0_g1	0.0240223	-5.37948	1.91e-10	4.17e-08	yes	down	6.16167	0.0676471	10.95	1.13	6.3	2.71	3.34	12.54	0	0	0	0	0	0	0	0	0	0	0	0	0	0	0	1.15	0	None
TRINITY_DN612_c0_g1	0.10373	-3.26909	1.91e-10	4.17e-08	yes	down	4.835	0.684706	3.93	3.2	6.36	5.7	5.03	4.79	0.41	0.31	0.33	0.42	0.67	0.58	0.95	1.26	0.33	0.23	0.37	0.58	0.69	0.64	1.19	0.94	1.74	XP_022814690.1(arrestin domain-containing protein 5-like [Spodoptera litura])
TRINITY_DN62823_c0_g2	0.165321	-2.59665	1.93e-10	4.21e-08	yes	down	12.2483	2.80588	14.58	17.43	6.5	8.82	15.14	11.02	3.7	3.46	2.92	2.17	1.99	1.92	4.69	3.25	2.66	2.16	1.7	2.05	1.89	2.42	3.58	3.51	3.63	XP_022828135.1(uncharacterized protein LOC111357604 [Spodoptera litura])
TRINITY_DN56893_c0_g1	0.131794	-2.92364	1.99e-10	4.34e-08	yes	down	13.8683	2.74824	14.74	13.89	13.79	10.58	14.31	15.9	2.51	2.34	2.94	3.61	3.09	3.74	1.36	1	7.55	3.56	3.04	2.9	3.22	3.36	0.64	1.11	0.75	XP_022829677.1(otopetrin-2-like isoform X1 [Spodoptera litura])
TRINITY_DN57689_c8_g4	0.0638172	-3.96991	2.01e-10	4.37e-08	yes	down	9.26	0.815294	8	11.89	3.21	9.07	11.67	11.72	0.16	0.36	0.55	0.63	0.51	0.38	2.34	0.68	0.45	0.58	0.46	0.49	0.73	0.75	0.45	1.55	2.79	None
TRINITY_DN58609_c0_g1	0.0201756	-5.63124	2.04e-10	4.43e-08	yes	down	1.075	0.0188235	1.15	0.1	0.45	1.05	0.49	3.21	0	0.11	0	0	0	0	0	0	0.21	0	0	0	0	0	0	0	0	XP_022826846.1(brachyurin-like [Spodoptera litura])
TRINITY_DN31759_c0_g1	0.00288295	-8.43824	2.04e-10	4.43e-08	yes	down	290.558	1.09353	283.85	372.05	196.43	304.59	318.01	268.42	0.16	0	0.37	0	0.07	0.06	3.44	5.46	0	0	0	0.06	0	0.07	2.62	4.54	1.74	PCG62835.1(hypothetical protein B5V51_13545 [Heliothis virescens])
TRINITY_DN26048_c0_g1	0.0234339	-5.41526	2.06e-10	4.46e-08	yes	down	0.683333	0.0117647	0.61	0.45	0.17	0.57	0.82	1.48	0	0	0	0	0	0	0	0	0.2	0	0	0	0	0	0	0	0	None
TRINITY_DN56977_c2_g1	0.10013	-3.32006	2.16e-10	4.68e-08	yes	down	1449.22	205.56	1491.47	1562.39	1245.42	1311.64	1756.86	1327.54	69.32	55.61	68.04	151.93	150.85	112.74	286.1	403.34	116.87	102.32	97.47	134.2	140.44	147.64	311.37	837.23	309.05	XP_022826025.1(uncharacterized protein LOC111356048 isoform X2 [Spodoptera litura])
TRINITY_DN60680_c2_g1	349.279	8.44824	2.17e-10	4.71e-08	yes	up	0.123333	54.7129	0.05	0.07	0.09	0.13	0.23	0.17	9.26	7.56	6.25	42.1	40.77	31.8	214.86	33.09	14.93	12.77	16.95	38.84	27.31	36.17	113.68	140.75	143.03	XP_022815022.1(glucose dehydrogenase [FAD, quinone]-like [Spodoptera litura])
TRINITY_DN119305_c0_g1	0.00696933	-7.16476	2.18e-10	4.71e-08	yes	down	73.92	0	96.81	96.09	63.43	63.93	76.76	46.5	0	0	0	0	0	0	0	0	0	0	0	0	0	0	0	0	0	None
TRINITY_DN161298_c0_g1	0.0238112	-5.39222	2.18e-10	4.71e-08	yes	down	0.26	0.00235294	0.04	0.09	0.12	0.4	0.3	0.61	0	0	0	0	0	0	0	0	0	0	0	0.04	0	0	0	0	0	None
TRINITY_DN40254_c0_g1	0.0307274	-5.02433	2.21e-10	4.78e-08	yes	down	156.192	6.75412	129.29	107.5	100.32	176.17	216.08	207.79	1.81	8.72	7.65	15.58	22.88	6.4	0.51	0	11.39	2.5	5.54	11.13	10.21	5.33	1.7	3.47	0	XP_022816339.1(cuticle protein 3-like [Spodoptera litura])
TRINITY_DN55942_c3_g1	0.0153858	-6.02226	2.22e-10	4.8e-08	yes	down	1.20833	0.0164706	0.72	2.45	2.5	0.13	0.06	1.39	0	0	0	0	0	0	0	0.2	0	0	0	0	0	0	0	0	0.08	None
TRINITY_DN64082_c33_g2	0.00584577	-7.41839	2.25e-10	4.85e-08	yes	down	28.7483	0	42.07	25.7	12.01	37.61	40.06	15.04	0	0	0	0	0	0	0	0	0	0	0	0	0	0	0	0	0	None
TRINITY_DN55481_c3_g2	0.0136958	-6.19012	2.26e-10	4.87e-08	yes	down	4.22	0.0776471	4.49	3.7	5.35	4.02	3.32	4.44	0	0.02	0.13	0	0.06	0	0.06	0.14	0	0	0	0.02	0.08	0	0.26	0.47	0.08	XP_022834587.1(peritrophin-1-like [Spodoptera litura])
TRINITY_DN52120_c1_g1	0.0263686	-5.24504	2.27e-10	4.87e-08	yes	down	5.68833	0.151765	6.25	2.8	6.71	6.51	3.95	7.91	0.36	0	0.35	0.14	0.07	0	0	0	0.04	0.38	0.58	0.26	0.4	0	0	0	0	None
TRINITY_DN62151_c2_g1	12.4549	3.63864	2.32e-10	4.99e-08	yes	up	17.9117	35.7176	11.56	20.53	12.49	10.49	28.89	23.51	30.59	24.51	35.91	52	63.05	43.01	16.44	24.99	37.44	42.19	45.73	40.7	43	61.16	12.09	12.7	21.69	XP_022830396.1(uncharacterized protein LOC111359169 [Spodoptera litura])
TRINITY_DN57655_c1_g2	0.0340512	-4.87615	2.36e-10	5.06e-08	yes	down	4.83333	0.207059	3.28	4.29	5.38	3.39	6.48	6.18	0.52	0	0	0.22	0	0.42	0	0	0	0.53	0	0.41	0.72	0.46	0.24	0	0	None
TRINITY_DN63718_c11_g2	0.272751	-1.87434	2.37e-10	5.08e-08	yes	down	273.7	169.219	259.37	278.7	278.19	266.67	303.91	255.36	177.02	172.57	221.44	177.87	164.19	184.74	112.92	182.99	227.4	165.28	216.21	190.07	159.4	175.16	154.83	91.28	103.36	XP_022837359.1(V-type proton ATPase subunit C [Spodoptera litura])
TRINITY_DN47269_c0_g1	0.0181079	-5.78723	2.38e-10	5.09e-08	yes	down	2.29	0.0464706	3.33	2.91	3.81	0.26	1.2	2.23	0	0	0	0	0	0	0	0.27	0	0.11	0	0	0	0	0	0	0.41	None
TRINITY_DN47985_c0_g1	0.0745512	-3.74562	2.39e-10	5.12e-08	yes	down	10.6983	0.971765	6.72	14.85	10.08	23.81	5.85	2.88	0.03	0.12	0.16	0.29	0.26	1.09	2.33	5.38	0.76	0.3	0.03	0.28	1.75	0.27	0.4	2.32	0.75	XP_022826141.1(allergen Api m 6-like [Spodoptera litura])
TRINITY_DN48299_c0_g1	0.0240731	-5.37643	2.42e-10	5.17e-08	yes	down	3.97	0.0947059	5.9	6.23	1.87	2.41	3.89	3.52	0	0	0	0	0.26	0	0	0	0.81	0	0	0	0	0	0	0.54	0	None
TRINITY_DN55838_c0_g2	0.183945	-2.44266	2.44e-10	5.2e-08	yes	down	7.55667	1.79882	7.22	5.32	7.13	7.86	11.17	6.64	2.27	2.42	2.43	1.35	1.18	1.69	1.76	1.83	2.14	2.08	2.32	1.1	1.14	1.11	2.14	1.7	1.92	XP_022830719.1(probable low-specificity L-threonine aldolase 2 isoform X2 [Spodoptera litura])
TRINITY_DN60573_c3_g2	88.0355	6.46001	2.47e-10	5.27e-08	yes	up	0.123333	11.8718	0.15	0.04	0.16	0.17	0.05	0.17	22.52	21.28	25.68	7.85	7.11	8.81	0.59	1.77	29.02	22.81	22.73	7.72	8.19	8.05	2.51	2.37	2.81	XP_022832970.1(neuronal PAS domain-containing protein 2-like isoform X2 [Spodoptera litura])
TRINITY_DN58943_c0_g1	0.282065	-1.8259	2.48e-10	5.28e-08	yes	down	64.2733	23.3094	49.56	57.38	62.86	67.72	78.17	69.95	21.43	17.21	16.55	23.59	20.75	21.81	28.15	27.87	24.1	21.13	24.3	28.71	24.65	26.16	22.84	22	25.01	XP_022821810.1(cytochrome b5-like [Spodoptera litura])
TRINITY_DN59173_c7_g2	0.140652	-2.82979	2.48e-10	5.28e-08	yes	down	7.45	3.35706	5.68	8.09	7.71	7.72	7.25	8.25	1.91	1.87	2.01	5.53	4.76	5.23	1.49	2.96	4.87	2.83	3.86	4.37	4.31	5.16	1.55	1.74	2.62	XP_022818246.1(myrosinase 1-like [Spodoptera litura])
TRINITY_DN11571_c0_g2	0.00550581	-7.50483	2.5e-10	5.32e-08	yes	down	1.34	0	0.89	0.32	1.56	1.46	1.2	2.61	0	0	0	0	0	0	0	0	0	0	0	0	0	0	0	0	0	None
TRINITY_DN141251_c0_g1	0.0147779	-6.08042	2.51e-10	5.34e-08	yes	down	0.97	0.0135294	0.79	0.75	0.15	2.96	1.07	0.1	0	0	0	0	0	0	0	0	0	0	0	0	0	0	0	0.23	0	None
TRINITY_DN57897_c0_g2	0.0136871	-6.19104	2.56e-10	5.42e-08	yes	down	1.11833	0.0182353	1.78	0.94	2.09	0.11	0.85	0.94	0	0	0	0	0	0	0.03	0.09	0	0	0	0	0	0	0.05	0.05	0.09	XP_022830987.1(uncharacterized protein LOC111359626 [Spodoptera litura])
TRINITY_DN54849_c0_g1	0.0063315	-7.30324	2.56e-10	5.43e-08	yes	down	1.4	0	1.24	0.65	1.95	0.91	1.07	2.58	0	0	0	0	0	0	0	0	0	0	0	0	0	0	0	0	0	None
TRINITY_DN51692_c0_g1	0.0127253	-6.29615	2.59e-10	5.48e-08	yes	down	93.1167	1.66235	93.92	69.69	89.24	98.3	96.7	110.85	0.19	0.04	0.14	4.02	5.2	4.52	1.3	0.21	0.37	0.3	0.04	3.14	3.81	3.93	0.29	0.68	0.08	XP_022825583.1(delta(7)-sterol 5(6)-desaturase erg32-like [Spodoptera litura])
TRINITY_DN57392_c1_g1	0.04521	-4.46721	2.59e-10	5.48e-08	yes	down	77.9867	6.50941	86.86	66.34	56.87	88.23	91.95	77.67	5.47	2.33	3.87	14.12	14.91	21.98	0	1.17	2.75	0.91	2.2	10.71	17.21	7.83	3.07	0.26	1.87	None
TRINITY_DN61963_c1_g2	0.0601686	-4.05484	2.6e-10	5.49e-08	yes	down	85.825	7.47529	55.31	102.03	62.76	119.94	54.85	120.06	5.96	8.97	8.41	6.85	17.88	12.49	0	1.71	9.4	7.56	7.46	10.67	11.29	11.72	2.5	1.92	2.29	None
TRINITY_DN47581_c0_g1	0.00351844	-8.15085	2.64e-10	5.57e-08	yes	down	454.737	2.82176	379.74	218.38	503.34	930.54	251.57	444.85	0.15	0.43	0.42	0.13	0	0	6.93	5.98	0	0.15	0.15	0	0.14	0	9.06	4.42	20.01	None
TRINITY_DN7622_c0_g1	0.0291539	-5.10017	2.65e-10	5.59e-08	yes	down	2.54667	0.0929412	2.14	2.56	2.62	3.01	2.69	2.26	0.12	0.11	0	0	0.21	0.19	0	0.48	0.11	0.36	0	0	0	0	0	0	0	None
TRINITY_DN33127_c0_g1	0.0225272	-5.47219	2.68e-10	5.64e-08	yes	down	30.0617	0.719412	35.14	66.64	22.86	14.74	36.95	4.04	0	3.58	0	0	0	0	0	0	4.6	0	0	4.05	0	0	0	0	0	None
TRINITY_DN22859_c0_g1	0.00573821	-7.44518	2.68e-10	5.64e-08	yes	down	6.92	0	6.84	12.95	9.27	6	3.54	2.92	0	0	0	0	0	0	0	0	0	0	0	0	0	0	0	0	0	None
TRINITY_DN69843_c0_g1	0.0399674	-4.64503	2.71e-10	5.71e-08	yes	down	4.52833	0.241765	5.09	3.23	4.17	6.45	5.8	2.43	0	0.15	0.58	0.54	0.69	0.25	0	0	0.15	0.63	0.15	0.12	0.43	0.28	0.14	0	0	None
TRINITY_DN48642_c0_g2	0.118611	-3.07569	2.76e-10	5.79e-08	yes	down	23.605	3.86471	22.38	16.79	27.19	20.96	19.1	35.21	1.21	1.59	1.22	4.29	2.6	3.55	4.24	8.73	2.89	2.87	4.02	4.44	3.92	3.8	4.49	5.68	6.16	XP_022829337.1(uncharacterized protein LOC111358433 [Spodoptera litura])
TRINITY_DN112388_c0_g1	0.0261446	-5.25735	2.78e-10	5.83e-08	yes	down	0.318333	0.00352941	0.25	0.12	0.89	0.16	0.2	0.29	0	0	0	0	0	0	0	0.06	0	0	0	0	0	0	0	0	0	None
TRINITY_DN3012_c0_g1	0.0335031	-4.89956	2.78e-10	5.84e-08	yes	down	1.675	0.0747059	1.38	0.94	1.78	2.16	1.94	1.85	0.03	0	0	0.04	0	0.02	0.11	0.16	0.05	0	0.12	0.04	0.05	0.16	0.24	0.14	0.11	None
TRINITY_DN57876_c3_g4	0.0183629	-5.76706	2.81e-10	5.88e-08	yes	down	9.75667	0.235294	5.51	7.22	16.93	13.03	6.46	9.39	0	0.04	0.04	0.57	0.4	0.21	0.03	0.34	0	0.04	0	0.72	0.72	0.62	0.17	0.03	0.07	XP_022836058.1(uncharacterized protein LOC111363464 [Spodoptera litura])
TRINITY_DN59205_c2_g1	0.0673123	-3.89299	2.85e-10	5.97e-08	yes	down	17.0433	1.69353	16.22	13.02	23.03	15.98	13.1	20.91	2.92	2.19	2.37	0.47	0.2	0.49	1.44	3.05	1.74	3.14	1.99	0.15	0.71	0.45	1.59	1.88	4.01	XP_022831976.1(luciferin 4-monooxygenase-like [Spodoptera litura])
TRINITY_DN56521_c0_g1	0.00628646	-7.31354	2.87e-10	6e-08	yes	down	30.9283	0	20.33	41.04	52.97	31.64	20.84	18.75	0	0	0	0	0	0	0	0	0	0	0	0	0	0	0	0	0	None
TRINITY_DN37173_c0_g1	0.028793	-5.11814	2.87e-10	6e-08	yes	down	0.438333	0.00588235	0.39	0.47	0.43	0.58	0.31	0.45	0	0	0	0	0	0	0	0	0	0	0	0	0	0	0	0	0.1	None
TRINITY_DN36809_c0_g1	11.0976	3.47218	2.91e-10	6.08e-08	yes	up	0.586667	9.62706	0.34	0.63	0.36	0.73	0.44	1.02	12.73	13.98	12.24	4.64	5.48	6.53	6.43	7.78	9.5	12.75	10.19	6.7	5.72	6.66	12.3	12.91	17.12	XP_022823989.1(multidrug resistance protein homolog 49-like [Spodoptera litura])
TRINITY_DN39557_c0_g1	0.0238662	-5.38889	2.94e-10	6.12e-08	yes	down	13.1033	0.133529	6.25	23.73	2.22	22.3	6.85	17.27	0	0	0	0	0	0	2.27	0	0	0	0	0	0	0	0	0	0	XP_022827203.1(lactase-phlorizin hydrolase-like [Spodoptera litura])
TRINITY_DN56289_c0_g5	0.0181025	-5.78767	2.94e-10	6.12e-08	yes	down	2.99	0.0235294	1.34	0.39	7.83	4.05	0	4.33	0	0	0	0	0.4	0	0	0	0	0	0	0	0	0	0	0	0	KJE32718.1(hypothetical protein LG49_4310 [Bacillus licheniformis])
TRINITY_DN55477_c0_g1	0.110715	-3.17508	2.94e-10	6.12e-08	yes	down	24.1433	3.77235	26.6	14.59	20.05	34.02	27.11	22.49	1.23	1.55	1.15	3.46	2.53	3.98	4.97	4.69	3.23	1.74	1.97	3.04	3.72	3.2	9.01	4.49	10.17	XP_022826110.1(uncharacterized protein LOC111356098 [Spodoptera litura])
TRINITY_DN62823_c0_g5	0.0247934	-5.3339	3.04e-10	6.32e-08	yes	down	6.44667	0.152941	4.23	8.32	7.65	10.36	3.05	5.07	0	0.22	0	0.2	0	0	1.4	0	0	0	0.42	0	0	0	0	0	0.36	XP_022828072.1(organic cation transporter protein-like [Spodoptera litura])
TRINITY_DN55821_c0_g1	0.036729	-4.76694	3.09e-10	6.42e-08	yes	down	2.28667	0.111765	2.02	2.87	2.08	1.72	1.63	3.4	0	0	0.07	0.16	0.04	0.06	0.31	0.1	0.14	0.03	0.02	0.26	0.05	0.02	0.23	0.25	0.16	XP_022815966.1(opsin-1-like [Spodoptera litura])
TRINITY_DN51271_c1_g1	0.0950659	-3.39493	3.15e-10	6.53e-08	yes	down	20.39	2.97824	19.91	27.36	15.87	20.11	22.55	16.54	3.28	2.78	1.83	5.26	5.62	6.18	1.56	0.98	1.55	2.09	2.24	3.79	4.45	5.72	1.47	1.16	0.67	XP_022814675.1(SID1 transmembrane family member 2-like [Spodoptera litura])
TRINITY_DN56598_c0_g1	0.290698	-1.78241	3.16e-10	6.54e-08	yes	down	467.48	205.859	473.53	425.74	437.02	441.54	502.61	524.44	195.23	201.32	220.94	273.87	274.27	234.5	94.17	160.08	254.36	232.13	240.94	257.26	244.42	228.64	112.49	121.97	153.02	XP_022825205.1(V-type proton ATPase subunit F [Spodoptera litura])
TRINITY_DN56113_c9_g4	0.099356	-3.33125	3.16e-10	6.55e-08	yes	down	0.92	0.131176	0.83	1.03	0.73	0.98	1.05	0.9	0.11	0.03	0.21	0.11	0.18	0.22	0.03	0.11	0.09	0.25	0.12	0.16	0.11	0.22	0.17	0.07	0.04	XP_022832170.1(uncharacterized serine-rich protein C215.13-like isoform X2 [Spodoptera litura])
TRINITY_DN59884_c0_g2	0.00580776	-7.4278	3.35e-10	6.93e-08	yes	down	0.725	0	0.76	0.18	0.52	0.79	0.62	1.48	0	0	0	0	0	0	0	0	0	0	0	0	0	0	0	0	0	None
TRINITY_DN49150_c0_g1	0.088989	-3.49023	3.38e-10	6.98e-08	yes	down	41.9983	5.30118	33.31	77.89	37.36	56.2	21.34	25.89	1.94	2.98	1.39	6.53	6.38	5.08	2.82	17.7	3.28	2.09	2.55	3.74	3.48	4.88	5.84	11.99	7.45	XP_014015140.1(PREDICTED: histone-lysine N-methyltransferase 2C-like isoform X7 [Salmo salar])
TRINITY_DN156316_c0_g1	0.00732467	-7.09302	3.42e-10	7.06e-08	yes	down	1.56333	0	1.11	0.84	1.86	2.77	1.66	1.14	0	0	0	0	0	0	0	0	0	0	0	0	0	0	0	0	0	None
TRINITY_DN162158_c0_g1	0.0154277	-6.01833	3.59e-10	7.4e-08	yes	down	0.62	0.00411765	0.9	1.16	0	1.36	0.3	0	0	0	0	0	0	0	0	0	0	0	0	0.07	0	0	0	0	0	None
TRINITY_DN110682_c0_g1	0.11813	-3.08155	3.6e-10	7.4e-08	yes	down	13.1433	2.12941	11.07	19.61	14.8	11.59	11.18	10.61	1.6	1.32	1.33	1.34	2.45	1.57	5.72	2.56	1.26	1.04	1.77	1.73	1.5	2	2.91	3.36	2.74	None
TRINITY_DN62123_c2_g2	0.00625581	-7.32059	3.73e-10	7.67e-08	yes	down	65.4033	0.491176	100.18	31.34	186.86	48.62	16.38	9.04	0	0	0.25	0	0	0	2.75	3.12	0	0	0	0	0	0	0	1.76	0.47	XP_022835059.1(vitellogenin-like [Spodoptera litura])
TRINITY_DN128592_c1_g1	0.0269737	-5.21231	3.87e-10	7.95e-08	yes	down	2.16167	0.0423529	0.84	0.65	2.68	4.54	1.53	2.73	0	0	0	0	0	0	0	0	0	0.38	0	0	0	0	0.34	0	0	None
TRINITY_DN48825_c0_g1	0.0499311	-4.32392	4.04e-10	8.3e-08	yes	down	10.2117	0.681176	10.81	8.1	8.65	14.03	11.21	8.47	0.12	0.11	0.65	0.5	1.7	0.78	0.84	1.09	0.53	0.23	0	0.47	0.21	0.42	0.33	1.91	1.69	None
TRINITY_DN63691_c0_g1	10.931	3.45035	4.14e-10	8.49e-08	yes	up	1.85167	26.89	1.89	2.02	2.4	1.2	1.91	1.69	21.04	16.44	24.06	20.52	21.93	23.05	57.54	37.45	24.51	22.57	17.85	21.2	17.67	24.76	34.93	36.94	34.67	None
TRINITY_DN165969_c0_g1	0.0399085	-4.64716	4.17e-10	8.54e-08	yes	down	0.561667	0.0282353	0.79	0.58	0.53	0.52	0.64	0.31	0.03	0.06	0	0.06	0	0.05	0	0	0	0	0.07	0.03	0.09	0.06	0	0.03	0	None
TRINITY_DN40901_c0_g1	0.0256355	-5.28571	4.17e-10	8.55e-08	yes	down	18.2533	0.601765	18.57	13.67	24.56	21.9	15.79	15.03	0.06	0	0.05	0.67	0.25	0.32	1.6	1.36	0.15	0	0.05	0.52	0.39	0.75	1.42	1.25	1.39	None
TRINITY_DN47141_c0_g1	0.0215132	-5.53864	4.18e-10	8.55e-08	yes	down	0.366667	0.00352941	0.24	0.47	0.11	0.94	0.44	0	0	0	0.06	0	0	0	0	0	0	0	0	0	0	0	0	0	0	None
TRINITY_DN67411_c0_g1	0.197433	-2.34057	4.24e-10	8.66e-08	yes	down	7.35	2.04824	5.84	5.47	9.76	7.99	8.62	6.42	2.07	1.39	1.73	1.93	2.09	2.28	2.29	1.88	2.93	2.83	1.98	2.05	1.79	1.96	1.51	2.12	1.99	None
TRINITY_DN60503_c0_g2	9.64897	3.27038	4.31e-10	8.79e-08	yes	up	26.895	347.928	30.29	27.67	39.62	28.63	16.45	18.71	419.14	403.71	386.57	197.16	177.88	188.37	629.59	357.59	346.54	433.72	435.22	169.24	142.15	128.61	468.43	583.57	447.29	XP_022820236.1(protein obstructor-E-like [Spodoptera litura])
TRINITY_DN17396_c0_g1	0.0389239	-4.6832	4.32e-10	8.8e-08	yes	down	2.86167	0.135294	2.7	1.31	1.75	5.67	3.52	2.22	0.07	0	0.25	0.23	0	0.07	0.24	0.07	0.25	0.09	0	0.22	0.32	0	0	0.41	0.08	None
TRINITY_DN58289_c11_g1	0.0254163	-5.2981	4.34e-10	8.84e-08	yes	down	3.505	0.0894118	2.31	3.87	3.28	4.18	5.16	2.23	0.68	0.84	0	0	0	0	0	0	0	0	0	0	0	0	0	0	0	None
TRINITY_DN63120_c2_g1	0.00789277	-6.98525	4.41e-10	8.97e-08	yes	down	0.726667	0	1	0.36	0.77	0.59	1.06	0.58	0	0	0	0	0	0	0	0	0	0	0	0	0	0	0	0	0	None
TRINITY_DN51716_c0_g1	0.0289574	-5.10992	4.43e-10	9.01e-08	yes	down	0.325	0.00882353	0.3	0.46	0.54	0.3	0.15	0.2	0	0	0	0.06	0	0.03	0.03	0	0	0	0	0	0	0.03	0	0	0	None
TRINITY_DN59586_c1_g3	0.287359	-1.79907	4.43e-10	9.01e-08	yes	down	153.942	63.8694	162.78	136.43	140.44	155.94	153.97	174.09	77.15	70.89	78.16	77.73	77.27	73.15	33.46	37.61	83.35	69.92	69.69	64.56	70.27	78.27	38.23	49.06	37.01	XP_022815609.1(ribonuclease kappa-like [Spodoptera litura])
TRINITY_DN43757_c0_g1	0.00591109	-7.40236	4.45e-10	9.03e-08	yes	down	23.5833	0.195294	9.08	79.77	3.8	25.51	10.38	12.96	0.05	0	0.02	0	0	0.06	0.26	1.1	0.02	0	0.07	0.04	0.02	0	0.98	0.13	0.57	XP_022814759.1(inactive pancreatic lipase-related protein 1-like [Spodoptera litura])
TRINITY_DN46885_c1_g1	0.0400176	-4.64322	4.46e-10	9.05e-08	yes	down	1.37667	0.0747059	1.23	1.63	1.49	0.49	2.56	0.86	0.29	0.16	0	0.1	0.1	0.05	0	0.05	0	0.17	0.06	0.14	0.1	0	0	0	0.05	None
TRINITY_DN55719_c10_g2	0.00768537	-7.02367	4.58e-10	9.27e-08	yes	down	0.778333	0	1.31	0.44	0.75	0.68	1	0.49	0	0	0	0	0	0	0	0	0	0	0	0	0	0	0	0	0	None
TRINITY_DN60127_c2_g1	0.20576	-2.28096	4.59e-10	9.28e-08	yes	down	69.7267	21.0359	69.11	79.83	45.15	43.9	56.72	123.65	22.23	14.32	26.19	28.47	28.07	25.79	7.83	26.58	30.1	23.48	15.43	25.72	24.77	22.93	9.95	17.5	8.25	XP_022831061.1(putative inorganic phosphate cotransporter [Spodoptera litura])
TRINITY_DN103631_c0_g1	0.0223743	-5.48201	4.64e-10	9.37e-08	yes	down	3.15167	0.09	1.71	2.92	4	3.39	5.3	1.59	0	0	0	0	0	0.09	0	0	0.11	0	0.55	0.27	0	0.51	0	0	0	None
TRINITY_DN60301_c1_g1	0.0499203	-4.32423	4.64e-10	9.37e-08	yes	down	9.75333	0.714118	12.65	9.01	8.04	8.8	10.57	9.45	0.23	0.15	0.07	0.34	0.24	0.32	2.61	1.85	0.22	0.04	0.33	0.9	0.53	0.43	1.33	1.54	1.01	XP_022832709.1(calcitonin gene-related peptide type 1 receptor-like isoform X2 [Spodoptera litura])
TRINITY_DN53924_c0_g3	0.135943	-2.87892	4.69e-10	9.47e-08	yes	down	25.255	4.66647	19.44	28.65	25.01	27.45	28.38	22.6	4.26	2.05	1.78	4.52	5.61	7.79	10.28	3.43	1.75	2.91	4.56	6.74	4.4	4.8	5.17	4.99	4.29	XP_022814960.1(syntaxin-1A-like isoform X1 [Spodoptera litura])
TRINITY_DN54614_c0_g2	0.0436251	-4.5187	4.74e-10	9.56e-08	yes	down	48.855	6.40647	38.06	39.7	28.61	23.29	102.2	61.27	9.09	2.8	3.57	2.97	4.79	0.59	0.63	0.58	23.08	20.36	19.29	5.32	6.26	8.5	0.43	0	0.65	None
TRINITY_DN49949_c0_g1	0.148981	-2.7468	4.97e-10	1e-07	yes	down	4.285	0.895294	3.4	5.77	5.42	3.04	4.01	4.07	0.48	0.61	0.63	0.6	1.11	1.18	1.22	1.22	0.8	0.4	1.01	1.18	1.18	1	0.89	0.7	1.01	None
TRINITY_DN62123_c2_g1	0.0266255	-5.23105	5.07e-10	1.02e-07	yes	down	1.69167	0.0658824	2.25	0.88	5.81	0.38	0.64	0.19	0.19	0.1	0.08	0	0	0.01	0.06	0.04	0.06	0.08	0.1	0	0.03	0.04	0.12	0.09	0.12	XP_022836900.1(vitellogenin-like [Spodoptera litura])
TRINITY_DN37173_c1_g2	0.0140535	-6.15293	5.11e-10	1.03e-07	yes	down	16.29	0.295882	13.83	12.63	17	13.69	13.5	27.09	0.33	0.1	0	0	0	0	1.21	0.7	0	0.11	0.11	0	0	0	0.39	1.2	0.88	XP_022829442.1(lipopolysaccharide-induced tumor necrosis factor-alpha factor homolog [Spodoptera litura])
TRINITY_DN8332_c0_g1	0.0273378	-5.19296	5.16e-10	1.04e-07	yes	down	0.408333	0.00705882	0.57	0.13	0.52	0.45	0.42	0.36	0	0	0	0	0	0	0	0	0	0	0	0.12	0	0	0	0	0	None
TRINITY_DN125308_c0_g1	0.00820191	-6.92982	5.18e-10	1.04e-07	yes	down	1.105	0	0.8	1.35	1.58	1.37	0.79	0.74	0	0	0	0	0	0	0	0	0	0	0	0	0	0	0	0	0	None
TRINITY_DN57655_c0_g1	0.036338	-4.78238	5.2e-10	1.04e-07	yes	down	10.9133	0.511765	10.27	11.67	10.15	8.8	16.52	8.07	0.81	1.58	1.47	0.7	0	0	0	0	0	0.85	2.51	0	0.78	0	0	0	0	None
TRINITY_DN50661_c0_g1	0.024019	-5.37968	5.25e-10	1.05e-07	yes	down	1.96167	0.0529412	1.96	2.92	0.8	2.09	2.41	1.59	0	0.11	0	0	0	0	0.39	0.18	0	0	0.22	0	0	0	0	0	0	None
TRINITY_DN56875_c0_g1	0.0321944	-4.95705	5.31e-10	1.06e-07	yes	down	22.5183	0.930588	17.06	9.65	18.51	21.12	23.89	44.88	0.68	0.52	0.66	1.76	1.63	2.37	0	0.85	0.4	0.46	0.36	2.18	1.96	1.04	0.04	0.14	0.77	XP_022829288.1(dentin sialophosphoprotein-like [Spodoptera litura])
TRINITY_DN42730_c0_g1	0.0139139	-6.16733	5.33e-10	1.06e-07	yes	down	14.9283	0.142941	12.53	6.04	14.42	16.88	21.78	17.92	0	0	0	0	0	0	0.7	0.47	0	0	0	0	0	0	0.1	0.32	0.84	XP_021200906.1(endocuticle structural glycoprotein SgAbd-5-like [Helicoverpa armigera])
TRINITY_DN61993_c0_g1	0.0321847	-4.95748	5.42e-10	1.08e-07	yes	down	9.33167	0.441176	8.56	7.65	10.35	7.42	11.16	10.85	0.88	0.94	0.87	0.54	0.63	0.17	0.06	0	0.49	0.65	0.63	0.22	0.83	0.5	0.09	0	0	XP_022816399.1(cytochrome P450 4d8-like [Spodoptera litura])
TRINITY_DN53247_c1_g1	0.0075014	-7.05863	5.49e-10	1.1e-07	yes	down	42.4267	0.334118	41.91	36.07	40.46	39.51	52.97	43.64	0	0	0.12	0	0	0	0.38	3.82	0	0	0	0	0	0	0.2	0.23	0.93	XP_022825069.1(uncharacterized protein LOC111355420 [Spodoptera litura])
TRINITY_DN55082_c8_g4	0.00754539	-7.05019	5.68e-10	1.13e-07	yes	down	209.332	2.03588	191.84	175.73	193.8	216.8	252.02	225.8	0.47	0.3	1.16	0	0.69	0.75	10.97	1.15	0.15	0	0.46	0	0.38	0	1.41	7.07	9.65	XP_022818446.1(uncharacterized protein LOC111350950 [Spodoptera litura])
TRINITY_DN60570_c2_g1	0.182161	-2.45672	5.72e-10	1.14e-07	yes	down	31.6383	5.87647	38.76	29.51	54.43	24.02	24.35	18.76	4.32	5.74	4	3.66	3.69	3.62	15.19	8.16	4.83	4.57	5.08	3.73	2.71	3.53	8.48	10.19	8.4	XP_022832147.1(fructose-bisphosphate aldolase isoform X2 [Spodoptera litura])
TRINITY_DN56383_c0_g1	0.104705	-3.2556	5.77e-10	1.15e-07	yes	down	4.415	0.660588	4.24	3.98	3.11	5.9	4.35	4.91	1.01	0.5	0.4	0.91	0.73	1.62	0.12	0.47	0.57	0.62	0.51	0.97	1.08	0.86	0.37	0.36	0.13	XP_022823599.1(helicostatins [Spodoptera litura])
TRINITY_DN105116_c0_g1	0.00610776	-7.35514	5.78e-10	1.15e-07	yes	down	6.69167	0	10.79	2.14	13.41	3.73	7.29	2.79	0	0	0	0	0	0	0	0	0	0	0	0	0	0	0	0	0	None
TRINITY_DN32107_c0_g2	0.238637	-2.06711	5.78e-10	1.15e-07	yes	down	24.465	8.15529	21.25	17.88	26.17	22.01	35.26	24.22	5.15	5.32	6.05	8.98	10.54	8.5	7.34	7.49	7.58	9.35	7.46	10.73	8.66	9.88	7.63	9.14	8.84	XP_022818415.1(retinaldehyde-binding protein 1-like [Spodoptera litura])
TRINITY_DN61516_c0_g3	0.00838905	-6.89728	5.8e-10	1.15e-07	yes	down	0.548333	0	0.52	0.24	0.57	0.86	0.64	0.46	0	0	0	0	0	0	0	0	0	0	0	0	0	0	0	0	0	None
TRINITY_DN117091_c0_g1	0.00955377	-6.70971	5.83e-10	1.16e-07	yes	down	9.08167	0.108235	6.47	6.06	0	14.92	9.76	17.28	0	0	0	0	0	0	0	0.21	0	0	0	0	0	0	0.58	0.94	0.11	XP_022823920.1(uncharacterized protein LOC111354604 [Spodoptera litura])
TRINITY_DN45268_c0_g1	0.00632088	-7.30566	5.83e-10	1.15e-07	yes	down	0.97	0	1.63	0.85	0.24	0.53	1.25	1.32	0	0	0	0	0	0	0	0	0	0	0	0	0	0	0	0	0	None
TRINITY_DN45843_c0_g1	0.0267059	-5.2267	5.9e-10	1.17e-07	yes	down	1.32833	0.0405882	1.13	1.01	0.28	1.48	3.3	0.77	0	0	0	0	0.24	0	0	0	0.11	0.12	0	0	0	0	0	0.22	0	None
TRINITY_DN57633_c2_g2	0.252864	-1.98356	5.93e-10	1.17e-07	yes	down	21.8967	8.18176	19.55	20.2	29.94	23.48	18.37	19.84	12.9	13.07	12.33	5.5	5.29	4.65	5.6	7.58	12.04	10.12	10.95	6.66	5.57	4.57	7.32	6.61	8.33	KOB76677.1(Uncharacterized protein OBRU01_05370 [Operophtera brumata])
TRINITY_DN60752_c0_g1	0.147131	-2.76483	5.96e-10	1.18e-07	yes	down	48.3367	9.36353	47.12	35.9	16.45	20.47	129.74	40.34	5.83	7.64	10.64	11.8	12.82	10.87	1.99	9.37	10.56	8.5	7.9	10.02	7.01	7.32	6.3	21.01	9.6	XP_022823884.1(lipase 1-like [Spodoptera litura])
TRINITY_DN52806_c0_g1	5.87809	2.55535	5.96e-10	1.18e-07	yes	up	1.155	9.68647	1.03	1.33	1.01	1.36	1.09	1.11	7.05	7.28	8	10.26	11.86	14.85	6.76	6.32	9.93	8.23	9.07	12.8	11.52	12.54	8.08	10.51	9.61	XP_022822469.1(uncharacterized protein LOC111353576 [Spodoptera litura])
TRINITY_DN761_c0_g1	0.0563148	-4.15034	6e-10	1.18e-07	yes	down	3.80833	0.302353	4.14	4.98	3.17	4.23	2.33	4	0.15	0.22	0.2	0.7	0.63	0.17	0	0	0.41	0.31	0.44	0.57	0.59	0.13	0.35	0.07	0.2	XP_022825545.1(von Willebrand factor D and EGF domain-containing protein-like [Spodoptera litura])
TRINITY_DN56960_c0_g2	11.7296	3.55208	6.1e-10	1.2e-07	yes	up	0.216667	3.15059	0.23	0.17	0.45	0.15	0.13	0.17	2.16	2.7	2.64	3.16	3.44	3.19	3.68	4.33	3.03	1.69	2.85	3.06	2.58	3.57	3.58	4.08	3.82	PCG63795.1(hypothetical protein B5V51_11702 [Heliothis virescens])
TRINITY_DN62408_c2_g2	0.20591	-2.27992	6.18e-10	1.21e-07	yes	down	253.925	78.6682	273.87	280.04	209.82	237.72	284.1	238	95.41	93.64	102.24	107.18	105.13	104.6	20.93	27.82	107.11	96.04	106.06	90.03	89.95	108.15	26.72	27.98	28.37	XP_021200675.1(V-type proton ATPase 116 kDa subunit a [Helicoverpa armigera])
TRINITY_DN62446_c3_g9	0.0320338	-4.96426	6.18e-10	1.21e-07	yes	down	89.4483	3.26882	99.59	30.7	109.04	69.65	109.73	117.98	0	0	0	5.92	6.49	0	0	0	6.46	6.91	6.59	0	0	23.2	0	0	0	None
TRINITY_DN59739_c0_g1	0.223215	-2.16349	6.32e-10	1.24e-07	yes	down	133.748	43.4441	127.6	108.56	129.82	138	152.7	145.81	23.8	27.38	33.25	68.04	69.52	57.48	17.78	36.2	45.12	33.39	36.92	64.51	63.21	62.55	28.86	32.42	38.12	XP_022829825.1(TPPP family protein CG45057 [Spodoptera litura])
TRINITY_DN62201_c0_g2	0.117062	-3.09465	6.38e-10	1.25e-07	yes	down	6.09833	1.00824	5.19	2.49	5.47	12.27	6.96	4.21	0.87	1.25	1.04	1.59	1.14	1.12	0.57	0.37	0.82	0.71	0.64	1.77	1.69	1.24	0.22	0.82	1.28	XP_022837957.1(WD repeat-containing protein 75-like [Spodoptera litura])
TRINITY_DN56421_c1_g1	0.0998681	-3.32383	6.39e-10	1.25e-07	yes	down	6.27833	0.874118	4.22	4.77	7.29	11.6	5.02	4.77	3.7	0.74	1.14	0.39	0.7	0.43	0.52	0.42	0.25	0.63	0.45	2.51	0.47	0.3	0.64	1.14	0.43	XP_022817424.1(esterase E4-like [Spodoptera litura])
TRINITY_DN60825_c1_g1	0.00516195	-7.59787	6.47e-10	1.27e-07	yes	down	3.13333	0	0.86	0.91	2.52	6.72	2.04	5.75	0	0	0	0	0	0	0	0	0	0	0	0	0	0	0	0	0	None
TRINITY_DN79969_c0_g1	0.0306595	-5.02752	6.54e-10	1.28e-07	yes	down	0.488333	0.00764706	0.56	0.45	0.41	0.6	0.27	0.64	0	0	0	0	0	0	0	0	0	0	0.13	0	0	0	0	0	0	None
TRINITY_DN21848_c0_g1	0.0207112	-5.59345	6.55e-10	1.28e-07	yes	down	3.24667	0.0435294	5.86	2.63	4.15	0	4.39	2.45	0	0	0	0.74	0	0	0	0	0	0	0	0	0	0	0	0	0	None
TRINITY_DN52317_c1_g3	0.211952	-2.23819	6.63e-10	1.29e-07	yes	down	265.948	79.0565	301.1	221.93	249.59	261.6	313.4	248.07	41.41	41.82	48.36	80.05	86.99	79.9	56.77	158.61	57.12	51.07	53	83.8	67.22	88.77	105.66	134.16	109.25	XP_022831811.1(cuticle protein 16.8-like [Spodoptera litura])
TRINITY_DN57691_c2_g1	0.246917	-2.0179	6.63e-10	1.29e-07	yes	down	52.41	16.4965	57.86	41.09	63.13	51.76	50.3	50.32	20.56	12.14	13.02	26.89	12.82	13.34	15.63	39.19	14.19	19.24	9.74	10.55	11.99	13.96	15.46	15.52	16.2	PCG67239.1(hypothetical protein B5V51_6674 [Heliothis virescens])
TRINITY_DN52787_c0_g1	0.0372405	-4.74698	6.64e-10	1.29e-07	yes	down	5.46833	0.275294	3.95	3.68	5.48	5.56	6.87	7.27	0.34	0.04	0	0.19	0.16	0.18	0.93	0.55	0	0.07	0.28	0.32	0.1	0.13	0.66	0.46	0.27	XP_022829676.1(uncharacterized protein LOC111358671 [Spodoptera litura])
TRINITY_DN58631_c0_g1	0.127082	-2.97617	6.73e-10	1.31e-07	yes	down	26.8717	4.04118	32.94	22.28	19.84	13.07	38	35.1	7.33	4.97	8.47	0.78	2.68	7.9	0.54	2.6	5.42	3.02	3.35	4.13	3.56	2.54	1.66	2.98	6.77	XP_022831387.1(multiple coagulation factor deficiency protein 2 homolog isoform X2 [Spodoptera litura])
TRINITY_DN62662_c3_g1	0.356191	-1.48928	6.93e-10	1.35e-07	yes	down	183.287	106.902	222.23	164.32	206.92	143.54	187.65	175.06	127.62	105.41	121.85	101.55	104.93	102.7	52.7	129.28	137.6	132.96	147.75	111.68	113.75	109.53	56.64	50.19	111.2	XP_022826632.1(fumarate hydratase, mitochondrial-like [Spodoptera litura])
TRINITY_DN61133_c0_g1	0.00697406	-7.16379	6.97e-10	1.35e-07	yes	down	0.43	0	0.16	0.47	0.17	0.7	0.71	0.37	0	0	0	0	0	0	0	0	0	0	0	0	0	0	0	0	0	None
TRINITY_DN53159_c0_g1	0.0142599	-6.13189	7.04e-10	1.37e-07	yes	down	7.91167	0.150588	10.65	10.25	5.2	7.29	11.43	2.65	0.02	0	0	0.07	0.25	0	0.22	0.69	0	0	0.04	0.11	0.18	0.04	0.47	0.34	0.13	XP_022831026.1(glucose dehydrogenase [FAD, quinone]-like [Spodoptera litura])
TRINITY_DN50765_c1_g1	0.0516648	-4.27467	7.18e-10	1.39e-07	yes	down	16.8767	1.18118	19.06	14.27	18.39	23.61	12.74	13.19	1.39	2.02	1.26	0	0	0	2.37	1.81	1.98	2.89	1.43	0.56	0	0.62	0	1.35	2.4	None
TRINITY_DN44438_c0_g1	0.149167	-2.745	7.21e-10	1.4e-07	yes	down	1.83667	0.384118	2.06	1.38	1.52	1.61	2.89	1.56	0.23	0.31	0.56	0.44	0.43	0.2	0.52	0.39	0.35	0.66	0.27	0.3	0.25	0.32	0.4	0.41	0.49	XP_022816762.1(T-related protein [Spodoptera litura])
TRINITY_DN52496_c5_g1	1163.66	10.1845	7.23e-10	1.4e-07	yes	up	0.266667	224.82	0.6	0.34	0.31	0.14	0.18	0.03	283.61	204.92	232.34	360.77	463.01	256.73	4.82	1.08	293.59	295.49	356.72	304.9	285.64	356.31	2.13	110.52	9.36	XP_022829620.1(collagenase-like isoform X2 [Spodoptera litura])
TRINITY_DN167251_c0_g1	0.00875594	-6.83552	7.26e-10	1.4e-07	yes	down	0.301667	0	0.21	0.33	0.33	0.45	0.33	0.16	0	0	0	0	0	0	0	0	0	0	0	0	0	0	0	0	0	XP_022831046.1(glucose dehydrogenase [FAD, quinone]-like [Spodoptera litura])
TRINITY_DN43029_c0_g1	0.00347909	-8.16707	7.51e-10	1.45e-07	yes	down	23.735	0	21.45	0.6	33.43	29.53	38.72	18.68	0	0	0	0	0	0	0	0	0	0	0	0	0	0	0	0	0	None
TRINITY_DN61890_c0_g2	0.211845	-2.23892	7.56e-10	1.46e-07	yes	down	95.1433	29.5353	104.2	105.22	76.21	78.44	108.95	97.84	23.23	22.81	25.03	41.04	43.06	43.85	9.61	16	30.16	28.03	37.11	38.99	38.77	42.17	13.58	33.79	14.87	XP_022819979.1(CD63 antigen-like [Spodoptera litura])
TRINITY_DN59433_c8_g1	0.168679	-2.56765	7.66e-10	1.48e-07	yes	down	3.16	0.752941	1.74	1.69	4.03	4.05	3.2	4.25	0.59	0.38	0.68	0.5	0.66	0.89	0.58	0.79	0.72	0.62	0.89	1.39	0.69	0.64	0.83	1.31	0.64	XP_022816181.1(elongation of very long chain fatty acids protein 7-like [Spodoptera litura])
TRINITY_DN63147_c3_g2	0.0581815	-4.10329	7.8e-10	1.5e-07	yes	down	271.263	33.8282	292.01	315.06	49.09	2.5	410.16	558.76	81.35	36.51	41.29	23.62	34.24	17.87	35.72	28.86	47.12	29.27	34.99	67.82	27.72	11.32	27.4	13.01	16.97	None
TRINITY_DN49583_c0_g1	0.0280703	-5.15481	7.8e-10	1.5e-07	yes	down	0.408333	0.00764706	0.15	0.26	0.93	0.74	0.25	0.12	0	0	0	0	0	0	0	0	0	0	0.07	0	0	0	0	0.06	0	None
TRINITY_DN54888_c4_g2	0.0276784	-5.1751	7.85e-10	1.51e-07	yes	down	113.85	8.14882	108.87	81.05	58.47	81.53	271.28	81.9	30.84	26.5	3.13	13.08	11.44	1.72	0	0	14.71	3.52	10.49	5.58	11.64	5.88	0	0	0	XP_022826690.1(uncharacterized protein LOC111356522 [Spodoptera litura])
TRINITY_DN57493_c1_g5	0.0482147	-4.37438	8.08e-10	1.55e-07	yes	down	41.9533	2.72882	46.68	63.63	35.6	23.03	47.85	34.93	0.54	0.52	3.46	5.63	2.01	0.89	5.56	3.72	2.06	2.82	0	4.8	0	1.45	5.6	2.61	4.72	XP_022828133.1(organic cation transporter protein-like [Spodoptera litura])
TRINITY_DN42417_c0_g1	0.0273	-5.19496	8.15e-10	1.56e-07	yes	down	5.13833	0.172941	4.88	5.45	4.41	1.78	8.68	5.63	0	0	0.25	0	0.12	0.11	0.82	0.22	0	0	0	0.32	0.12	0	0	0.25	0.73	None
TRINITY_DN62043_c0_g4	0.0049379	-7.66189	8.26e-10	1.58e-07	yes	down	1.31667	0	1.56	1.6	0.06	1.61	1.67	1.4	0	0	0	0	0	0	0	0	0	0	0	0	0	0	0	0	0	None
TRINITY_DN59356_c0_g1	16.3814	4.03399	8.55e-10	1.64e-07	yes	up	0.54	12.2635	0.66	0.5	0.6	0.41	0.54	0.53	10.25	7.57	10.28	16.16	14.97	17.75	1.54	5.78	18.33	15.11	19.53	18.96	14.73	21.69	5.85	6.11	3.87	XP_022834032.1(solute carrier family 22 member 5-like isoform X2 [Spodoptera litura])
TRINITY_DN39702_c0_g1	133.127	7.05666	8.64e-10	1.65e-07	yes	up	0.0516667	14.7459	0.16	0.15	0	0	0	0	23.26	36.36	23.63	15.48	10.95	9.19	2.01	4.08	28.72	24.77	23.52	12.81	12.23	11.28	3.43	3.01	5.95	None
TRINITY_DN52643_c1_g2	383.991	8.58493	8.69e-10	1.66e-07	yes	up	0.0316667	18.7671	0.05	0.03	0	0.06	0.05	0	4.6	5.3	6.86	8.12	8.25	5.79	61.3	51.22	4.99	5.86	4.38	8.7	8.34	9.17	41.69	28.92	55.55	PNF41072.1(hypothetical protein B7P43_G06245 [Cryptotermes secundus])
TRINITY_DN60492_c0_g1	0.031281	-4.99857	8.72e-10	1.67e-07	yes	down	2.035	0.0664706	1.87	0.7	4.49	1.65	1.56	1.94	0.1	0	0	0.1	0.17	0	0	0.22	0	0.04	0.05	0	0.17	0.06	0	0.13	0.09	PCG77537.1(hypothetical protein B5V51_7107, partial [Heliothis virescens])
TRINITY_DN20508_c0_g1	0.0191719	-5.70486	8.83e-10	1.69e-07	yes	down	3.315	0.0911765	3.16	3.03	2.46	4.39	3.72	3.13	0	0.11	0.13	0	0	0.04	0.1	0.07	0	0.64	0.03	0	0	0.05	0.1	0.28	0	XP_022832495.1(uncharacterized protein LOC111360656 [Spodoptera litura])
TRINITY_DN50423_c1_g1	0.0136518	-6.19477	8.83e-10	1.68e-07	yes	down	4.39333	0.0605882	13.62	6.68	0.19	2.68	0.32	2.87	0	0	0	0	0	0	0	0	0	0	0	0	0	0	0	0	1.03	None
TRINITY_DN57696_c0_g1	0.0429716	-4.54047	8.88e-10	1.69e-07	yes	down	4.61167	0.265882	5.14	8.81	3.99	4.39	2.27	3.07	0.06	0.08	0.16	0.55	0.64	0.22	0.51	0.38	0.11	0.06	0.05	0.51	0.64	0.2	0.2	0.15	0	XP_022837726.1(putative inorganic phosphate cotransporter [Spodoptera litura])
TRINITY_DN57835_c5_g1	0.103718	-3.26926	9.01e-10	1.72e-07	yes	down	3.27167	0.475882	3.49	2.13	5.63	2.66	2.7	3.02	0.25	0.36	0.78	0.33	0.18	0.49	0.96	0.11	0.42	0.8	0.86	0.63	0.62	0.41	0.25	0.16	0.48	None
TRINITY_DN44063_c0_g1	0.0227759	-5.45635	9.14e-10	1.74e-07	yes	down	0.83	0.0217647	1.05	0.9	1.63	0.03	0.61	0.76	0	0	0	0.06	0.03	0.05	0.03	0.08	0	0	0	0	0	0	0	0.12	0	XP_022814931.1(uncharacterized protein LOC111348521 [Spodoptera litura])
TRINITY_DN3338_c0_g1	0.0356181	-4.81124	9.4e-10	1.79e-07	yes	down	8.48167	0.408824	7.85	7.49	7.55	10.7	10.03	7.27	0	0.24	0.24	0.78	0.79	0.51	0	0	0	0.52	0.38	0.71	1.28	1.03	0	0.24	0.23	None
TRINITY_DN58937_c0_g1	0.0306256	-5.02912	9.42e-10	1.79e-07	yes	down	10.115	0.505294	1.05	3.65	3.86	42.77	1.59	7.77	0.53	1.47	1.46	0.15	0.22	0.21	0.06	0.11	1.12	1.36	0.92	0.14	0.16	0.18	0.06	0.14	0.3	XP_022827207.1(facilitated trehalose transporter Tret1-like [Spodoptera litura])
TRINITY_DN61269_c1_g1	0.00843567	-6.88928	9.59e-10	1.82e-07	yes	down	1384.87	1.61647	1688.99	1911.25	949.39	1039.69	1287.99	1431.89	0	0	0	0.81	0.81	0.66	3.83	4.42	0	0.04	0.5	0.69	0.2	1.61	2.78	7.16	3.97	XP_022830240.1(uncharacterized protein LOC111359044 [Spodoptera litura])
TRINITY_DN61025_c1_g1	6.9415	2.79525	9.65e-10	1.83e-07	yes	up	0.765	7.51353	0.67	0.73	0.87	0.66	0.87	0.79	7.65	7.09	7.47	9.38	10.45	10.3	7.31	4.01	7.89	6.54	7.62	9.25	8.31	9.9	4.98	4.77	4.81	XP_021189394.1(serine/threonine-protein kinase SMG1 [Helicoverpa armigera])
TRINITY_DN64065_c1_g1	0.368396	-1.44067	9.7e-10	1.84e-07	yes	down	26.175	13.6294	24.38	21.43	28.5	21.85	28.79	32.1	11.17	11.63	13.04	13.99	14.74	19.22	7.21	13.72	16.65	12.12	13.76	17.37	14.78	12.25	11.99	11.81	16.25	XP_022814764.1(LOW QUALITY PROTEIN: uncharacterized protein LOC111348402 [Spodoptera litura])
TRINITY_DN51471_c0_g1	0.0450421	-4.47258	9.76e-10	1.85e-07	yes	down	2.56333	0.157059	2.14	1.76	2.32	1.76	4.74	2.66	0.33	0	0.04	0.36	0.4	0.25	0	0.11	0.34	0.05	0.13	0.25	0.21	0.12	0.04	0	0.04	XP_022816758.1(retinol dehydrogenase 11-like [Spodoptera litura])
TRINITY_DN57174_c11_g2	0.0504838	-4.30804	9.88e-10	1.87e-07	yes	down	56.5367	3.97882	70.29	61.86	24.8	32.59	89.19	60.49	3.65	3.58	3.26	9.42	0	4.58	0	0	5.18	1.9	3.73	6.04	5.34	4.75	0	14.67	1.54	None
TRINITY_DN158418_c0_g1	0.00899791	-6.79619	9.91e-10	1.87e-07	yes	down	6.47333	0	9.38	4.4	2.91	7.06	8.12	6.97	0	0	0	0	0	0	0	0	0	0	0	0	0	0	0	0	0	None
TRINITY_DN52320_c0_g1	0.0182138	-5.77882	9.94e-10	1.87e-07	yes	down	1.27333	0.0223529	0.69	0.26	0.23	0.23	5.92	0.31	0	0	0	0	0	0	0.06	0.18	0	0	0.07	0	0	0	0	0	0.07	XP_022814866.1(histidine-rich glycoprotein-like [Spodoptera litura])
TRINITY_DN61672_c0_g1	18.0283	4.17219	9.99e-10	1.88e-07	yes	up	13.0117	306.784	16.25	11.65	12.06	10.24	13.7	14.17	163.93	160.76	170.36	163.61	147.15	152.34	657.97	656.93	148.67	163.55	146.86	143.37	130.2	155.83	628.79	790.7	634.3	XP_022820520.1(stathmin-4 isoform X3 [Spodoptera litura])
TRINITY_DN58614_c0_g2	0.110683	-3.17549	1e-09	1.88e-07	yes	down	6.78667	1.12	6.67	4.64	9.97	8.15	4.51	6.78	0.88	0.37	0.5	0.81	0.57	0.78	1.99	2.35	0.77	0.35	0.65	0.95	0.9	0.53	3.16	1.86	1.62	XP_022824840.1(SET and MYND domain-containing protein 4 [Spodoptera litura])
TRINITY_DN62514_c0_g3	0.270938	-1.88397	1.03e-09	1.94e-07	yes	down	260.312	104.585	239.08	271.63	276.27	279.83	219.28	275.78	154.33	149.4	165.26	118.81	116.2	103.79	60.74	33.48	141.1	141.78	155.29	94.84	92.48	110.23	49.73	45.09	45.39	XP_022826202.1(glutamate dehydrogenase, mitochondrial [Spodoptera litura])
TRINITY_DN60886_c1_g2	0.298238	-1.74546	1.03e-09	1.94e-07	yes	down	169.285	80.4982	145.92	145.84	182.82	185.83	167.34	187.96	104.49	94.43	109.78	96.39	97.32	89	26.64	49.54	107.41	90.44	98.12	105.51	86.21	90.67	32.64	52.64	37.24	XP_022825943.1(renin receptor [Spodoptera litura])
TRINITY_DN59271_c0_g1	0.0102216	-6.61223	1.04e-09	1.95e-07	yes	down	20.1067	0.267647	19.84	17.37	21.08	20.67	20.91	20.77	0.02	0	0.04	0.02	0.02	0.03	1.09	0.24	0.06	0.04	0	0.02	0.04	0.08	0.68	1.49	0.68	XP_022817164.1(esterase E4-like [Spodoptera litura])
TRINITY_DN60532_c0_g1	0.0614583	-4.02425	1.08e-09	2.03e-07	yes	down	0.698333	0.184706	0.35	0.46	0.79	0.58	1.07	0.94	0.07	0	0.02	0.02	0	0.06	0.05	0.12	0.06	0.09	0.05	2.34	0.13	0.06	0	0.03	0.04	XP_022825908.1(peroxidase-like [Spodoptera litura])
TRINITY_DN52490_c0_g1	0.00564585	-7.46859	1.09e-09	2.05e-07	yes	down	53.1467	0.348235	50.88	45.4	65.55	59.45	43.66	53.94	0	0	0	0.07	0	0	3.82	0.2	0	0.08	0	0	0.07	0	0.94	0.15	0.59	ATU07282.1(takeout [Spodoptera litura])
TRINITY_DN58563_c3_g2	0.0275226	-5.18324	1.09e-09	2.05e-07	yes	down	0.568333	0.0123529	0.35	0.42	0.26	0.57	0.24	1.57	0	0	0	0	0	0	0	0.13	0	0	0	0	0	0	0	0.08	0	XP_022823598.1(uncharacterized protein LOC111354388 [Spodoptera litura])
TRINITY_DN58698_c1_g1	0.105541	-3.24412	1.1e-09	2.05e-07	yes	down	7.86667	1.17176	7.47	5.21	6.42	7.39	10.3	10.41	0.86	0.68	0.85	0.65	0.53	0.62	0.39	3	0.69	0.84	0.65	0.87	0.76	0.73	2.56	2.75	2.49	XP_022831497.1(uncharacterized protein LOC111359975 isoform X4 [Spodoptera litura])
TRINITY_DN55578_c1_g1	0.00968497	-6.69004	1.12e-09	2.09e-07	yes	down	1.37333	0	1.91	0.99	1.42	0.88	1.15	1.89	0	0	0	0	0	0	0	0	0	0	0	0	0	0	0	0	0	None
TRINITY_DN37211_c0_g1	0.157729	-2.66448	1.12e-09	2.09e-07	yes	down	24.87	5.81588	22.47	20.2	23.18	22.05	30.01	31.31	8.16	8.97	11.26	4.79	5.21	4.29	1.04	4.81	5.26	10.73	6.34	3.3	3.59	2.47	6.62	6.88	5.15	None
TRINITY_DN57101_c1_g1	0.0055359	-7.49697	1.13e-09	2.11e-07	yes	down	158.853	1.62176	151.96	163.91	109.72	180.38	185.82	161.33	0	0	0	0.18	0	0.17	5.61	3	0	0	0.09	0	0.39	0	5.88	9.25	3	PCG67375.1(hypothetical protein B5V51_6478 [Heliothis virescens])
TRINITY_DN55953_c4_g4	0.075532	-3.72677	1.13e-09	2.11e-07	yes	down	3.13	0.334706	3.24	3.32	1.62	2.84	4.52	3.24	0.17	0.04	0.04	0.22	0.37	0.23	0.29	0.17	0.47	0.5	0.85	0.63	0.53	0.68	0.07	0.12	0.31	None
TRINITY_DN61218_c0_g2	0.262279	-1.93083	1.15e-09	2.14e-07	yes	down	295.575	111.078	250.81	286.3	328.51	255.57	222.52	429.74	140.03	138.57	131.48	153.13	183.44	138.16	76.49	52.59	84.91	73.81	89.03	162.95	104.22	88.79	77.02	112.51	81.19	PCG64500.1(hypothetical protein B5V51_10559 [Heliothis virescens])
TRINITY_DN59409_c0_g1	0.200468	-2.31855	1.16e-09	2.15e-07	yes	down	29.6767	8.44529	29.99	19.29	21.68	32.5	37.99	36.61	13.99	14.57	13.32	5.85	5.21	6.62	0.91	6.86	13.87	11.38	11.46	5.23	6.01	6.21	7.28	7.84	6.96	XP_022816998.1(zinc transporter foi [Spodoptera litura])
TRINITY_DN56049_c0_g1	0.0324788	-4.94436	1.16e-09	2.15e-07	yes	down	3.18333	0.102353	2.11	3.14	2.24	1.52	7.9	2.19	0.4	0	0	0	0	0	0	0.67	0	0	0	0.32	0	0.35	0	0	0	None
TRINITY_DN53747_c2_g1	0.0655987	-3.93019	1.16e-09	2.16e-07	yes	down	19.1233	1.94059	22.67	25.26	13.18	25.75	13.49	14.39	4.13	2.25	3.04	1.33	0	1.91	1.44	2.4	0	3.36	0	3.47	1.61	0.68	0.73	1.64	5	None
TRINITY_DN63864_c0_g1	0.0247987	-5.33359	1.18e-09	2.19e-07	yes	down	68.9683	1.38647	71.72	84.69	28.76	115.34	49.64	63.66	0	0	0	0	0	0	23.57	0	0	0	0	0	0	0	0	0	0	XP_022821650.1(trypsin CFT-1-like isoform X4 [Spodoptera litura])
TRINITY_DN34121_c0_g1	0.0789268	-3.66334	1.2e-09	2.23e-07	yes	down	26.5233	2.81941	18.14	22.43	18.62	27.29	43.9	28.76	1.94	0	1.17	3.9	3.01	1.06	6.61	1.67	2.45	3.35	3.31	5.2	1.22	4	4.87	2.49	1.68	None
TRINITY_DN59031_c2_g1	0.214466	-2.22118	1.22e-09	2.26e-07	yes	down	33.6783	11.6582	26.85	15.32	27.44	44.62	53.65	34.19	13.3	16.6	14.19	6.38	4.85	10.35	2.91	12.31	19.94	15.24	23.54	8.16	10.34	12.85	9.05	7.59	10.59	XP_022819059.1(pyrimidodiazepine synthase-like [Spodoptera litura])
TRINITY_DN61286_c1_g2	0.0341939	-4.87012	1.23e-09	2.28e-07	yes	down	0.71	0.0429412	0.78	0.19	0.43	0.19	1.93	0.74	0	0.06	0	0.06	0.07	0.05	0	0.16	0.03	0.02	0.07	0.11	0.03	0	0	0.07	0	None
TRINITY_DN52298_c0_g1	0.0368375	-4.76268	1.25e-09	2.31e-07	yes	down	3.92	0.201176	4.88	3.44	0.21	3.12	7.51	4.36	0	0.1	0.31	0.14	0.09	0.39	0	0.13	0.25	0.11	0.05	0.51	0.54	0.05	0	0.4	0.35	XP_022818242.1(myrosinase 1-like isoform X1 [Spodoptera litura])
TRINITY_DN64076_c13_g1	19.8621	4.31194	1.27e-09	2.35e-07	yes	up	32.4167	1032.05	33.05	68.69	24.51	32.59	26.96	8.7	1812.1	1860.79	2231.59	457.33	479.5	561.23	234.9	349.81	2215.1	2371.72	2347.99	516.94	405.46	491.35	478.19	451.53	279.37	XP_022837131.1(apolipophorins isoform X2 [Spodoptera litura])
TRINITY_DN59988_c2_g2	0.211183	-2.24343	1.27e-09	2.35e-07	yes	down	29.65	9.32118	31.92	24.09	24.75	22.3	42.39	32.45	14.57	13.94	14.58	9.68	9.16	8.27	2.08	4.58	13.27	11.8	11.72	9.72	10.75	11.61	3.37	5.22	4.14	PCG73451.1(hypothetical protein B5V51_14790 [Heliothis virescens])
TRINITY_DN56026_c1_g1	0.213301	-2.22904	1.28e-09	2.37e-07	yes	down	12.695	3.94353	14.63	13.49	12.26	14.18	10.58	11.03	3.65	6.11	4.04	3.57	3.02	2.43	3.99	2.47	5.83	6.43	6.16	3.74	3.76	3.11	2.19	2.78	3.76	XP_022820089.1(uncharacterized protein LOC111352027 isoform X1 [Spodoptera litura])
TRINITY_DN37098_c0_g1	0.0294638	-5.08491	1.28e-09	2.37e-07	yes	down	1.12333	0.0335294	0.88	0.38	1.03	1.15	1.19	2.11	0	0	0	0	0	0.28	0.15	0.07	0	0	0	0.07	0	0	0	0	0	None
TRINITY_DN23380_c0_g1	0.0310522	-5.00916	1.3e-09	2.39e-07	yes	down	0.231667	0.00470588	0.15	0.04	0.54	0.18	0.15	0.33	0	0	0	0.02	0	0	0	0	0	0	0.04	0	0.02	0	0	0	0	None
TRINITY_DN60415_c0_g8	6.80401	2.76639	1.3e-09	2.4e-07	yes	up	3.81333	36.0129	3.71	3.86	4.21	3.8	3.52	3.78	20.6	18.06	23.15	52.35	45.69	44.87	51.19	20.69	35.09	26.84	28.8	43.39	46.56	46.11	33.07	32.36	43.4	XP_022814707.1(aldehyde dehydrogenase X, mitochondrial-like [Spodoptera litura])
TRINITY_DN60695_c1_g1	0.00838906	-6.89727	1.33e-09	2.44e-07	yes	down	3.40833	0	4.09	4.95	2.15	1.52	3.67	4.07	0	0	0	0	0	0	0	0	0	0	0	0	0	0	0	0	0
TRINITY_DN82587_c0_g1	0.0267725	-5.22311	1.34e-09	2.46e-07	yes	down	6.82333	0.0794118	6.05	5.48	11.5	12.88	5.03	0	0	0	1.35	0	0	0	0	0	0	0	0	0	0	0	0	0	0	None
TRINITY_DN61326_c1_g1	0.00822798	-6.92525	1.35e-09	2.48e-07	yes	down	691.525	7.98765	662.3	705.99	575.41	789.53	676.81	739.11	0.32	0.82	1.25	0.7	0.53	0.76	9.88	19.99	0.8	0.55	1.08	1.49	0.74	0.85	38.69	11.35	45.99	XP_022830129.1(larval/pupal cuticle protein H1C-like [Spodoptera litura])
TRINITY_DN62945_c0_g1	0.312834	-1.67653	1.36e-09	2.49e-07	yes	down	1015.62	471.568	1205.83	936.67	860.16	985.26	1100.4	1005.41	505.15	575.9	547.77	633.38	574.86	596.12	153.84	224.45	640.75	567.23	657.51	496.11	524.81	601.69	216.83	264.61	235.65	AQQ72786.1(V-ATPase subunit B [Spodoptera exigua])
TRINITY_DN60739_c0_g1	0.30456	-1.7152	1.36e-09	2.49e-07	yes	down	244.367	111.335	216.98	254.33	247.04	275.45	203.31	269.09	188.32	170.47	187.21	77.56	77.52	71.24	81.65	79.65	168.78	165.42	180.2	68.85	73.37	66.06	74.79	80.96	80.65	XP_022819284.1(isocitrate dehydrogenase [NADP] cytoplasmic [Spodoptera litura])
TRINITY_DN20521_c0_g1	0.199287	-2.32708	1.36e-09	2.49e-07	yes	down	20.2117	5.72294	16.52	10.74	26.02	26.46	24.77	16.76	5.73	5.22	5.37	8.28	7.61	5.77	2.32	3.11	9.33	5.92	5.54	8.06	6.34	6.83	2.36	3.29	6.21	XP_022816237.1(uncharacterized protein LOC111349366 [Spodoptera litura])
TRINITY_DN59406_c0_g2	0.161853	-2.62724	1.36e-09	2.49e-07	yes	down	8.385	1.86235	7.27	6.38	10.06	9.49	5.55	11.56	1.42	1.63	1.11	2.96	2.97	2.41	2.25	1.49	0.88	1.15	0.94	2.14	2.47	1.37	1.9	2.09	2.48	AFO38465.1(delta-9 desaturase 14-26 [Spodoptera exigua])
TRINITY_DN49997_c0_g1	0.0984692	-3.34418	1.37e-09	2.5e-07	yes	down	1.26333	0.179412	1.65	1.21	1.24	0.86	1.28	1.34	0.22	0.14	0.12	0.04	0.04	0.07	0.26	0.03	0.24	0.21	0.24	0.2	0.21	0.23	0.15	0.15	0.5	XP_022825268.1(cytochrome b5-related protein-like [Spodoptera litura])
TRINITY_DN26733_c0_g1	0.0458286	-4.44761	1.39e-09	2.54e-07	yes	down	24.8267	1.53353	26.96	30.65	18.57	19.78	20.46	32.54	0.17	0.25	0.22	0.9	0.64	0.67	4.54	3.01	0.49	0.48	0.37	0.88	0.95	1.03	3.48	4.08	3.91	XP_022817997.1(uncharacterized protein LOC111350597 [Spodoptera litura])
TRINITY_DN36703_c0_g2	0.0286174	-5.12697	1.4e-09	2.55e-07	yes	down	4.43667	0.178235	1.87	1.78	4.75	9.75	2.12	6.35	0.16	0.37	0.11	0.23	0.32	0.15	0	0	0.43	0.05	0.13	0.37	0.52	0.17	0.02	0	0	XP_022821636.1(monocarboxylate transporter 6-like isoform X1 [Spodoptera litura])
TRINITY_DN31836_c0_g1	0.0100366	-6.63859	1.42e-09	2.59e-07	yes	down	25.2283	0.301765	20.51	23.68	24.87	36.87	17.75	27.69	0.1	0.07	0.07	1.05	0.64	0.72	0.02	0	0	0.09	0	0.58	1.19	0.54	0	0	0.06	XP_022831711.1(facilitated trehalose transporter Tret1-2 homolog [Spodoptera litura])
TRINITY_DN60088_c1_g1	5.35674	2.42136	1.43e-09	2.61e-07	yes	up	13.1933	63.1471	10.37	8.01	18.62	8.79	17.88	15.49	53.48	50.67	52.76	80.77	84.72	82.82	22.15	39.29	71.53	69.84	73.52	92.25	81.48	100.26	40.25	40.66	37.05	XP_022834943.1(protein fem-1 homolog CG6966 isoform X1 [Spodoptera litura])
TRINITY_DN56766_c0_g1	0.208501	-2.26187	1.49e-09	2.7e-07	yes	down	6.825	2.01294	6.96	5.92	4.64	5.41	10.06	7.96	1.37	1.45	1.54	1.91	2.23	2.7	1.62	2.15	1.92	1.71	2.43	2.51	2.29	2.39	1.8	2.48	1.72	XP_022819791.1(sex peptide receptor-like [Spodoptera litura])
TRINITY_DN61993_c1_g3	0.0448566	-4.47854	1.51e-09	2.75e-07	yes	down	16.015	1.34765	12.13	14.03	18.84	17.68	13.34	20.07	1.17	0.42	3.48	1.27	1.22	0.88	0.12	0.12	2.63	1.43	3.9	2.77	1.17	2.11	0.13	0.09	0	XP_022816127.1(cytochrome P450 4V2-like [Spodoptera litura])
TRINITY_DN45343_c0_g2	0.00713971	-7.12992	1.54e-09	2.79e-07	yes	down	125.197	1.19118	135.96	101.69	144.28	135.61	112.03	121.61	0.08	0.07	0.14	0.06	0.19	0	3.18	2.91	0.07	0.07	0.14	0	0	0.13	4.55	2.5	6.16	XP_022816237.1(uncharacterized protein LOC111349366 [Spodoptera litura])
TRINITY_DN59000_c0_g2	0.269929	-1.88935	1.55e-09	2.81e-07	yes	down	272.472	115.726	287.28	268.46	276.02	267.81	263.9	271.36	127.4	131.71	138.7	127.68	123.28	133.68	29.85	57.09	174.58	144.57	179.86	141.4	139.75	145.55	49.88	63.61	58.75	XP_022837359.1(V-type proton ATPase subunit C [Spodoptera litura])
TRINITY_DN54364_c0_g1	0.0148721	-6.07125	1.56e-09	2.83e-07	yes	down	458.507	8.14235	526.65	462.01	375.11	255.14	931.85	200.28	3.22	3.16	2.92	14.44	22.82	36.17	8.4	0	0.08	0.17	0	14.91	18.41	13.72	0	0	0	XP_016116186.1(PREDICTED: glycine-rich cell wall structural protein-like, partial [Sinocyclocheilus grahami])
TRINITY_DN49978_c0_g1	209.856	7.71326	1.58e-09	2.87e-07	yes	up	0.0466667	16.2418	0.03	0	0.04	0.14	0.03	0.04	38.45	43.09	39.35	2.26	1.57	1.98	16.66	10.29	27.09	23.97	22.85	1.79	2.33	1.7	11	14.39	17.34	XP_022828096.1(uncharacterized protein LOC111357574 [Spodoptera litura])
TRINITY_DN59077_c3_g1	0.0263967	-5.2435	1.59e-09	2.88e-07	yes	down	1.36833	0.0494118	2.46	1.51	1.82	0.2	1.33	0.89	0	0.04	0.21	0	0	0.07	0	0.24	0.16	0	0	0	0	0.04	0	0	0.08	XP_022824527.1(V-type proton ATPase subunit D-like [Spodoptera litura])
TRINITY_DN52115_c0_g2	0.0096735	-6.69175	1.6e-09	2.89e-07	yes	down	0.376667	0	0.52	0.27	0.5	0.52	0.29	0.16	0	0	0	0	0	0	0	0	0	0	0	0	0	0	0	0	0	XP_022831314.1(facilitated trehalose transporter Tret1-like [Spodoptera litura])
TRINITY_DN140184_c0_g1	0.00762027	-7.03594	1.66e-09	2.99e-07	yes	down	1.07833	0	1.62	1.32	1.13	0.16	0.8	1.44	0	0	0	0	0	0	0	0	0	0	0	0	0	0	0	0	0	None
TRINITY_DN61545_c6_g3	0.117663	-3.08726	1.66e-09	2.99e-07	yes	down	22.5783	24.9476	17.18	34.48	40.89	7.56	24.62	10.74	3.34	0.2	14.57	26.44	0.74	34.42	22.02	90.59	1.66	0.56	14.37	0.39	44.21	27.44	51.88	37.16	54.12	KPJ09732.1(X-linked retinitis pigmentosa GTPase regulator-like [Papilio machaon])
TRINITY_DN63504_c0_g1	4.00491	2.00177	1.67e-09	3.01e-07	yes	up	18.2017	119.579	22.43	25.3	13.44	14.65	18.46	14.93	150.88	119.35	157.05	147.68	124.63	122.28	48.32	38.71	156.9	184.5	148.51	157.22	148.25	163.43	45.55	70.27	49.32	XP_021192331.1(6-phosphofructo-2-kinase/fructose-2,6-bisphosphatase-like isoform X1 [Helicoverpa armigera])
TRINITY_DN60421_c2_g2	66.9305	6.06459	1.68e-09	3.03e-07	yes	up	0.12	13.3218	0	0	0.36	0.29	0.03	0.04	8.92	10.17	10.35	14.43	13.65	15.17	7.62	4.21	18.75	16.34	16.75	25.87	22.67	24.78	5.91	5.5	5.38	None
TRINITY_DN61918_c3_g1	0.0457606	-4.44975	1.69e-09	3.04e-07	yes	down	56.065	1.32353	70.37	47.33	71.24	50.14	28.47	68.84	0	0	1.38	0.78	1.08	0.97	4.38	1.21	0.91	0.92	0.55	0.24	1.79	0.54	5.24	1.98	0.53	None
TRINITY_DN43348_c0_g1	0.183902	-2.44299	1.69e-09	3.04e-07	yes	down	9.55333	2.35	7.01	10.52	10.93	7.72	10.99	10.15	1.93	1.76	1.99	1.14	1.15	2.16	5.93	3.48	1.76	1.58	2.07	1.42	1.61	1.69	2.26	4.12	3.9	None
TRINITY_DN113772_c0_g1	46.8484	5.54993	1.69e-09	3.04e-07	yes	up	0.543333	38.4124	0.66	1.51	0.13	0.52	0.3	0.14	33.88	29.46	36.29	53.84	62.78	70.05	12.87	7.72	43.33	40.29	43.26	66.35	58.82	64.34	9.47	9.77	10.49	None
TRINITY_DN55599_c0_g1	0.257953	-1.95482	1.7e-09	3.05e-07	yes	down	73.5317	28.0947	60.08	50.31	84.68	80.04	84.82	81.26	46.49	40.93	42.46	16.28	16.55	15.41	21.16	19.63	46.18	39.02	45.69	25.92	20.11	23.03	17.93	19.51	21.31	XP_022822255.1(peptidyl-prolyl cis-trans isomerase-like [Spodoptera litura])
TRINITY_DN55953_c4_g1	0.0397235	-4.65386	1.7e-09	3.05e-07	yes	down	17.9617	1.03294	17.98	38.77	12.86	10.17	19.79	8.2	0.62	0.32	0.28	0.73	1.29	3.73	0.99	0.26	0.47	0.79	2.06	2.42	2.02	1.33	0.2	0	0.05	XP_022820243.1(lens fiber major intrinsic protein-like [Spodoptera litura])
TRINITY_DN59555_c4_g2	0.00252562	-8.62914	1.71e-09	3.06e-07	yes	down	8.98833	0	22.82	7.55	16.25	3.26	0.53	3.52	0	0	0	0	0	0	0	0	0	0	0	0	0	0	0	0	0	None
TRINITY_DN47543_c0_g1	0.00517279	-7.59484	1.71e-09	3.06e-07	yes	down	55.56	0.385294	76.07	57.86	34.49	77.43	46.29	41.22	0	0	0.26	0	0	0	0.68	2.15	0	0	0.03	0.1	0	0.03	1.34	1.43	0.53	XP_022837528.1(serpin-Z10-like [Spodoptera litura])
TRINITY_DN56645_c0_g1	0.126596	-2.9817	1.71e-09	3.06e-07	yes	down	25.7783	10.2741	33.04	31.01	30.25	14.69	27.41	18.27	9.01	11.86	13.27	2.7	5.21	19.21	6.56	8.7	7.58	11.12	7.24	1.86	3.67	45.33	8.47	5.9	6.97	None
TRINITY_DN62692_c0_g1	3.43966	1.78226	1.74e-09	3.11e-07	yes	up	11.9283	64.8435	13.78	10.44	11.78	10.8	11.77	13	57.35	46.71	57.93	68.6	76.31	77.84	31.1	57.95	68.1	65.29	72.12	72.79	64.13	89.16	65.6	78.77	52.59	OWR47627.1(hypothetical protein KGM_211802 [Danaus plexippus plexippus])
TRINITY_DN54718_c0_g2	0.166394	-2.58732	1.77e-09	3.15e-07	yes	down	3.125	0.734706	3.76	2.21	3.21	2.59	3.98	3	0.64	0.53	0.51	0.7	0.82	1.2	0.07	0.94	0.76	0.64	1.11	0.9	0.78	0.87	0.8	0.64	0.58	XP_022820488.1(zinc finger protein chinmo isoform X1 [Spodoptera litura])
TRINITY_DN54599_c0_g1	0.00381313	-8.03481	1.77e-09	3.16e-07	yes	down	365.355	1.70765	399.78	509.17	291.81	245.68	353.98	391.71	0.17	0.05	0.27	0.07	0.02	0.04	13.31	5.98	0.08	0.06	0.08	0.07	0.2	0.05	2.76	2.58	3.24	XP_022826475.1(collagenase-like [Spodoptera litura])
TRINITY_DN30346_c0_g1	0.0223377	-5.48438	1.77e-09	3.16e-07	yes	down	50.8717	1.54529	48.14	39.19	44.74	56.71	67.51	48.94	0.33	0.23	0.19	0.48	0.28	0.33	2.23	4.09	0.3	0.3	0.09	0.57	0.22	0.16	2.7	8.85	4.92	XP_022829517.1(lipopolysaccharide-induced tumor necrosis factor-alpha factor homolog [Spodoptera litura])
TRINITY_DN50381_c0_g2	0.0180761	-5.78977	1.79e-09	3.18e-07	yes	down	4.015	0.107059	10.26	6.56	5.03	1.86	0.19	0.19	0.06	0.09	0.1	0	0.01	0.01	0.1	0.24	0.03	0.03	0.05	0.03	0.03	0.02	0.28	0.51	0.23	XP_022831709.1(fatty acid synthase-like isoform X2 [Spodoptera litura])
TRINITY_DN44383_c0_g1	0.0250012	-5.32186	1.79e-09	3.18e-07	yes	down	1.685	0.0147059	0	1.31	0.4	3.75	2.41	2.24	0	0	0	0	0	0	0	0	0	0	0.25	0	0	0	0	0	0	None
TRINITY_DN52947_c0_g2	0.245699	-2.02504	1.82e-09	3.24e-07	yes	down	21.1717	7.59353	16.24	17.95	23.64	25.1	17.36	26.74	10.89	11.93	12.55	4.47	3.89	4.2	8.17	7.18	9.92	8.82	8.23	4.72	4.06	4.34	7.57	8.74	9.41	XP_022825515.1(cytochrome b5-related protein-like [Spodoptera litura])
TRINITY_DN57345_c1_g3	0.146733	-2.76874	1.84e-09	3.27e-07	yes	down	73.12	14.3129	80.59	61.39	70.66	90.83	69.77	65.48	8.1	7.16	5.84	15.23	11.77	11.98	17.88	33.49	7.34	6.71	8.65	8.54	7.54	8.53	29.57	29.09	25.9	XP_022832112.1(aldo-keto reductase AKR2E4-like [Spodoptera litura])
TRINITY_DN63429_c1_g2	0.00283765	-8.46109	1.85e-09	3.29e-07	yes	down	2.505	0	3.66	8.47	0.66	1.07	0.4	0.77	0	0	0	0	0	0	0	0	0	0	0	0	0	0	0	0	0	XP_022825082.1(uncharacterized protein LOC111355430 [Spodoptera litura])
TRINITY_DN55719_c11_g1	0.0319103	-4.96984	1.87e-09	3.31e-07	yes	down	1.68833	0.0458824	2.58	1	0.92	0.88	2.39	2.36	0	0.55	0	0	0	0.23	0	0	0	0	0	0	0	0	0	0	0	None
TRINITY_DN56802_c0_g1	0.221845	-2.17237	1.94e-09	3.44e-07	yes	down	7.295	2.29059	7.71	8.05	5.05	5.68	11.19	6.09	1.94	1.61	2.15	2.8	2.18	1.94	1.99	2.92	2.02	2.21	1.51	2.3	2.17	2.18	2.81	3.5	2.71	XP_022821116.1(uncharacterized protein LOC111352727 [Spodoptera litura])
TRINITY_DN55539_c0_g1	5.51468	2.46328	1.95e-09	3.46e-07	yes	up	6.595	52.0012	4.44	5.45	7.16	7.29	7.2	8.03	66.02	68.63	71.13	66.47	61.72	60.41	27.31	23.37	64.98	60.84	62.65	58.89	52.46	58.05	27.19	27.02	26.88	XP_022831790.1(short-chain specific acyl-CoA dehydrogenase, mitochondrial [Spodoptera litura])
TRINITY_DN61929_c0_g1	0.00880428	-6.82758	1.96e-09	3.48e-07	yes	down	1.63	0	1.52	0.45	2.64	1.75	2.23	1.19	0	0	0	0	0	0	0	0	0	0	0	0	0	0	0	0	0	None
TRINITY_DN47996_c0_g1	0.136934	-2.86845	1.97e-09	3.48e-07	yes	down	12.1983	2.27882	10.36	5.36	10.88	19.39	15.79	11.41	1.53	1.44	0.94	3.79	3.06	3.16	2.61	2.68	2.51	2.48	2.31	3	1.35	3.21	1.94	1.25	1.48	None
TRINITY_DN62098_c0_g1	0.304121	-1.71728	2.02e-09	3.57e-07	yes	down	301.433	129.127	320.59	321.81	306.83	255.53	302.74	301.1	151.21	155.18	164.89	165.77	163.62	153.85	54.74	71.22	169.02	159.01	172.21	139.23	134.81	154.06	55.44	64.9	66	XP_022822596.1(tRNA-splicing endonuclease subunit Sen2 [Spodoptera litura])
TRINITY_DN49389_c2_g1	0.0342974	-4.86576	2.07e-09	3.66e-07	yes	down	0.505	0.02	1.02	0.2	0.36	0.36	0.7	0.39	0.1	0	0	0.12	0	0	0	0	0.04	0	0.04	0.04	0	0	0	0	0	None
TRINITY_DN58950_c0_g1	0.210459	-2.24839	2.1e-09	3.7e-07	yes	down	34.36	10.76	39.57	19.39	39.03	38.2	37.16	32.81	15.13	14.07	16.23	4.92	5.34	6.78	1.2	10.21	16.13	15.28	18.25	6.22	6.52	7.83	13.83	13.1	11.88	PCG80066.1(hypothetical protein B5V51_11628 [Heliothis virescens])
TRINITY_DN53082_c0_g1	0.0459548	-4.44364	2.11e-09	3.72e-07	yes	down	26.7317	1.82824	19.97	15.84	39.71	14.11	26.49	44.27	0.07	0	0.06	3.32	3.25	1.62	4.06	0	1.13	4.36	2.46	1.14	4.1	4.02	0.77	0.12	0.6	XP_009523605.1(hypothetical protein PHYSODRAFT_384849, partial [Phytophthora sojae])
TRINITY_DN56458_c0_g1	52.2069	5.70617	2.14e-09	3.77e-07	yes	up	0.0516667	4.10529	0	0	0	0.25	0.06	0	3.04	2.75	2.63	3.02	3.59	5.31	6.8	5.06	2.33	3.4	4.29	5.47	4.51	4.76	4.32	4.28	4.23	None
TRINITY_DN59277_c1_g1	0.0102627	-6.60645	2.18e-09	3.83e-07	yes	down	0.47	0	0.47	0.67	0.24	0.28	0.56	0.6	0	0	0	0	0	0	0	0	0	0	0	0	0	0	0	0	0	None
TRINITY_DN62862_c0_g3	0.278168	-1.84597	2.19e-09	3.85e-07	yes	down	282.033	121.756	290.86	216.26	258.46	324.95	327.82	273.85	138.26	138.06	166.41	110.54	126.96	121.27	20.71	88.92	188.03	162.47	174.38	129.48	135.66	155.7	69.64	74.45	68.92	XP_022818893.1(uncharacterized protein LOC111351287 [Spodoptera litura])
TRINITY_DN161365_c0_g1	0.151642	-2.72126	2.2e-09	3.86e-07	yes	down	2.915	0.615882	2.51	2.03	3.25	2.97	2.75	3.98	0.46	0.51	0.2	0.58	0.78	0.71	0.6	0.26	0.61	0.57	0.6	0.76	0.57	0.94	0.96	0.87	0.49	XP_022821010.1(uncharacterized protein LOC111352646 [Spodoptera litura])
TRINITY_DN62639_c2_g1	0.280398	-1.83445	2.24e-09	3.93e-07	yes	down	16.535	6.76824	17.04	12.62	17.6	16.42	18.75	16.78	9.18	8.84	9.32	4.52	4.28	3.76	3.71	7.37	10.11	9.38	8.98	4.11	4.5	4.82	7.34	7.06	7.78	ADI61812.1(endonuclease-reverse transcriptase [Bombyx mori])
TRINITY_DN50809_c0_g1	0.0580809	-4.10579	2.25e-09	3.94e-07	yes	down	17.845	1.01824	19.54	21.98	6.36	13.17	13.47	32.55	0.65	0	0.29	1.08	0.88	0.64	2.06	1.17	1.07	0.68	1.33	0.76	0.17	0.77	2.43	3.16	0.17	XP_022834068.1(ejaculatory bulb-specific protein 3-like [Spodoptera litura])
TRINITY_DN63195_c1_g1	0.18541	-2.43121	2.29e-09	4.01e-07	yes	down	2783.85	761.737	2106.1	2404.63	3146.82	2644.77	2208.57	4192.22	528.78	526.77	630.56	1398.8	1395.26	1318.74	370.31	244.93	745.25	656.41	661.19	1268.73	1099.55	1330.35	266.66	264.49	242.75	XP_021195474.1(myosin light chain alkali isoform X2 [Helicoverpa armigera])
TRINITY_DN50307_c2_g1	0.0454578	-4.45933	2.29e-09	4.02e-07	yes	down	35.1983	2.16176	33.76	21.82	45.11	34.75	33.97	41.78	0.25	0.05	0.29	4.72	3.73	3.72	1.12	3.39	0.38	0.23	0.26	4.17	3.57	3.57	1.76	3.83	1.71	XP_022832987.1(sodium/potassium/calcium exchanger 4-like [Spodoptera litura])
TRINITY_DN133501_c0_g1	0.00885278	-6.81965	2.31e-09	4.04e-07	yes	down	1.21333	0	1.25	1.03	0.31	1.12	0.94	2.63	0	0	0	0	0	0	0	0	0	0	0	0	0	0	0	0	0	None
TRINITY_DN62631_c0_g1	4.43136	2.14775	2.31e-09	4.04e-07	yes	up	1.64333	10.9606	1.38	0.92	1.98	2.16	1.67	1.75	14.7	11.56	12.41	6.93	8.29	9.01	7	6.03	17.45	14.89	14.69	11.25	10.13	10.46	10.56	10.99	9.98	XP_022816453.1(ATP-binding cassette sub-family G member 8 [Spodoptera litura])
TRINITY_DN58496_c0_g2	0.151128	-2.72616	2.31e-09	4.04e-07	yes	down	56.2883	11.7488	39.95	58.62	64.06	38.84	55.42	80.84	7.07	7.32	6.04	8.61	7.85	7.81	25.44	15.56	6.72	7.81	7.72	7.81	10.22	8.06	13.27	28.02	24.4	XP_022828047.1(zinc finger protein GLIS2-like [Spodoptera litura])
TRINITY_DN53967_c0_g1	0.124694	-3.00354	2.32e-09	4.05e-07	yes	down	7.26167	1.26235	6.41	5.57	5.87	7.14	9.6	8.98	1.11	0.66	1.13	0.51	0.61	0.46	1.88	2.72	0.66	0.83	1.03	0.82	1.12	0.39	2.34	2.44	2.75	XP_022831497.1(uncharacterized protein LOC111359975 isoform X4 [Spodoptera litura])
TRINITY_DN54473_c0_g1	0.462954	-1.11106	2.34e-09	4.07e-07	yes	down	1115.04	748.873	965.35	1165.29	1049.53	1208.52	1089.73	1211.81	862.1	837.77	891.4	802.46	766.89	703.27	468.41	497.63	880.44	835.63	883.03	788.77	822.99	745.62	679.48	549.99	714.96	XP_022828547.1(thioredoxin-2 [Spodoptera litura])
TRINITY_DN72534_c0_g1	0.0109568	-6.51203	2.35e-09	4.09e-07	yes	down	1.37	0	0.94	1.27	2.33	1.55	0.77	1.36	0	0	0	0	0	0	0	0	0	0	0	0	0	0	0	0	0	None
TRINITY_DN54703_c0_g1	15.4376	3.94837	2.36e-09	4.1e-07	yes	up	0.166667	3.81706	0.1	0.12	0.25	0.11	0.27	0.15	4.58	5.08	4.99	4.36	3.89	2.36	3.46	1.94	8.12	6.11	5.56	2.28	3.61	1.68	2.45	1.53	2.89	XP_012545869.1(uncharacterized protein LOC101742783 [Bombyx mori])
TRINITY_DN51421_c0_g1	0.0362548	-4.78568	2.38e-09	4.14e-07	yes	down	7.24167	0.355882	10.1	3.68	5.55	5.74	11	7.38	0.12	0.45	0.22	0.31	1.05	0.38	0	0	0.22	0	0.58	0.47	1.5	0.64	0	0	0.11	None
TRINITY_DN59903_c0_g1	0.00554681	-7.49413	2.42e-09	4.21e-07	yes	down	61.74	0	59.61	38.95	208.61	15.19	12.67	35.41	0	0	0	0	0	0	0	0	0	0	0	0	0	0	0	0	0	None
TRINITY_DN61102_c6_g1	44.8645	5.4875	2.47e-09	4.28e-07	yes	up	2.2	115.841	3.62	0.98	0.21	2.42	3.74	2.23	94.28	105.92	114.57	282.03	274.71	217.59	30.31	124.46	145.81	38.91	90.43	131.72	170.7	50.66	46.09	8.58	42.53	XP_022826919.1(trans-1,2-dihydrobenzene-1,2-diol dehydrogenase-like [Spodoptera litura])
TRINITY_DN63668_c1_g2	0.191401	-2.38533	2.5e-09	4.34e-07	yes	down	2061.69	552.706	1666.49	2102.1	2343.25	1911.71	1732.75	2613.82	371.03	300.23	371.38	930.5	998.94	1027.9	411.08	209.73	409.81	388.8	412.3	1018.28	802.21	1023.8	235.83	252.56	231.62	XP_022827247.1(myosin regulatory light chain 2 [Spodoptera litura])
TRINITY_DN57614_c1_g3	0.166231	-2.58874	2.54e-09	4.4e-07	yes	down	33.71	8.19647	33.65	31.2	51.67	30.22	28.93	26.59	9.48	6.48	9.76	8.34	7.7	10.17	1.07	6.5	9.23	13.73	9.4	15.9	10.51	11.25	3.42	1.67	4.73	XP_022830191.1(peptide methionine sulfoxide reductase [Spodoptera litura])
TRINITY_DN59196_c0_g2	0.0104865	-6.57533	2.55e-09	4.42e-07	yes	down	0.53	0	0.34	0.35	0.48	1.13	0.54	0.34	0	0	0	0	0	0	0	0	0	0	0	0	0	0	0	0	0	None
TRINITY_DN109284_c0_g1	0.00893008	-6.80711	2.59e-09	4.48e-07	yes	down	3.89333	0	4.15	4.42	9.16	1.61	2.3	1.72	0	0	0	0	0	0	0	0	0	0	0	0	0	0	0	0	0	None
TRINITY_DN58920_c0_g2	0.115271	-3.1169	2.63e-09	4.54e-07	yes	down	30.6217	5.29529	28.23	25.57	35.5	26.17	33.17	35.09	11.17	11.59	10.78	1.42	1.22	2.24	2.86	1.1	9.79	11.44	10.25	3.36	3.6	3.04	2.17	1.56	2.43	XP_022821406.1(cytochrome P450 4g1-like [Spodoptera litura])
TRINITY_DN56816_c6_g1	67.7493	6.08213	2.7e-09	4.66e-07	yes	up	0.678333	40.6759	0.41	0.53	0.68	1.53	0.42	0.5	50.83	51.62	60.43	2.46	4.84	4.3	83.08	53.78	48.6	45.67	45.92	7.06	6.26	5.59	76.76	85.21	59.08	PCG70802.1(hypothetical protein B5V51_2565 [Heliothis virescens])
TRINITY_DN28330_c0_g1	0.0270928	-5.20595	2.73e-09	4.71e-07	yes	down	12.7367	0.451176	13.62	3.81	23.54	16.02	13.13	6.3	0	0.36	0	0.5	1.87	0.61	0	0.16	0.18	0	0	1.21	1.58	0.86	0	0	0.34	XP_022816499.1(endocuticle structural protein SgAbd-6-like [Spodoptera litura])
TRINITY_DN23946_c0_g1	0.0281266	-5.15192	2.74e-09	4.72e-07	yes	down	9.94333	0.230588	14	9.25	21.66	6.78	1.94	6.03	0	0	3.92	0	0	0	0	0	0	0	0	0	0	0	0	0	0	None
TRINITY_DN121284_c0_g1	0.0368193	-4.76339	2.74e-09	4.72e-07	yes	down	1.35833	0.0676471	1.64	0.93	1.96	1.92	0.92	0.78	0.14	0.04	0	0	0.04	0.04	0	0	0	0.24	0.27	0.22	0.08	0.08	0	0	0	None
TRINITY_DN18055_c0_g1	0.0912852	-3.45348	2.76e-09	4.75e-07	yes	down	14.4283	1.86647	11.32	23.52	11.67	21.23	9.96	8.87	1.07	1.25	0.66	2.3	2.23	1.82	0.23	4.82	0.66	0.35	1.11	2.01	1.99	1.74	2.91	3.64	2.94	XP_022825189.1(proline-rich protein 4-like [Spodoptera litura])
TRINITY_DN36815_c2_g1	0.0245094	-5.35052	2.78e-09	4.78e-07	yes	down	1.84333	0.0376471	4.87	3.81	0.58	0.19	1.01	0.6	0	0	0.22	0.42	0	0	0	0	0	0	0	0	0	0	0	0	0	None
TRINITY_DN58948_c8_g1	0.0114718	-6.44576	2.81e-09	4.83e-07	yes	down	1.35667	0	1.13	1.33	1.07	1.03	1.21	2.37	0	0	0	0	0	0	0	0	0	0	0	0	0	0	0	0	0	None
TRINITY_DN49663_c0_g5	0.0304909	-5.03548	2.82e-09	4.84e-07	yes	down	0.4	0.00882353	0.76	0.42	0.26	0.13	0.29	0.54	0	0.15	0	0	0	0	0	0	0	0	0	0	0	0	0	0	0	None
TRINITY_DN6868_c0_g1	0.00969075	-6.68918	2.86e-09	4.9e-07	yes	down	1.00167	0	1.02	0.41	0.56	0.55	2.1	1.37	0	0	0	0	0	0	0	0	0	0	0	0	0	0	0	0	0	XP_022816596.1(inducible metalloproteinase inhibitor protein-like [Spodoptera litura])
TRINITY_DN33059_c0_g1	0.0609879	-4.03533	2.86e-09	4.9e-07	yes	down	11.25	0.851176	10.33	4.88	20.61	16.95	10.98	3.75	0.53	2.03	0.96	0	0.97	0.86	1.35	1.35	1.08	0.17	1.24	0	0	0	0.38	3.02	0.53	None
TRINITY_DN59772_c0_g3	0.340019	-1.55631	2.87e-09	4.92e-07	yes	down	41.395	33.3912	39.89	38.83	44.92	47.28	41.15	36.3	28.87	32.48	30.43	31.36	32.37	28.26	21.17	58.9	28.3	31.43	29.12	36.43	29.57	25.67	30.36	38.48	54.45	XP_022817592.1(luciferin 4-monooxygenase-like [Spodoptera litura])
TRINITY_DN57101_c0_g1	0.0346623	-4.85049	2.91e-09	4.99e-07	yes	down	0.291667	0.00470588	0.18	0.21	0.28	0.19	0.44	0.45	0.08	0	0	0	0	0	0	0	0	0	0	0	0	0	0	0	0	None
TRINITY_DN57803_c0_g1	29.6365	4.8893	3.01e-09	5.15e-07	yes	up	1.86333	74.9129	1.67	1.77	0.8	3.35	2.03	1.56	34.67	24.46	31.59	102.75	118.42	119.07	14.96	16.79	77.7	61.24	105.74	189.11	147.41	164.35	21.56	21.35	22.35	XP_022816365.1(transcriptional activator MN1-like [Spodoptera litura])
TRINITY_DN56739_c6_g2	0.0262998	-5.2488	3.01e-09	5.15e-07	yes	down	3.44833	0.0547059	0.81	0.47	6.88	4.08	5.35	3.1	0	0.93	0	0	0	0	0	0	0	0	0	0	0	0	0	0	0	XP_013162491.1(PREDICTED: uncharacterized protein LOC106113978 [Papilio xuthus])
TRINITY_DN56609_c0_g1	0.0176413	-5.8249	3.01e-09	5.14e-07	yes	down	1.205	0.02	3.51	1.65	1.36	0.37	0.34	0	0	0	0	0	0	0	0	0	0	0	0	0	0	0	0.34	0	0	None
TRINITY_DN62782_c0_g1	15.2098	3.92693	3.06e-09	5.22e-07	yes	up	0.163333	4.15588	0.2	0.1	0.1	0.14	0.25	0.19	1.79	1.8	1.32	2	2.39	4.8	1.4	7.15	3.69	1.94	2.97	5.04	4.6	5	9.41	8.9	6.45	XP_021188697.1(zinc finger protein 628-like isoform X8 [Helicoverpa armigera])
TRINITY_DN54619_c2_g1	31.6207	4.9828	3.07e-09	5.23e-07	yes	up	0.7	35.17	1.09	0.39	1.06	0.62	0.36	0.68	12.04	16.28	14.42	22.97	21.8	16.9	51.44	61.65	15.8	12.83	15.13	23.38	24.41	24.12	67.56	108.61	88.55	XP_022829000.1(uncharacterized protein LOC111358225 [Spodoptera litura])
TRINITY_DN61621_c1_g1	0.359581	-1.47561	3.09e-09	5.26e-07	yes	down	421.927	242.459	355.29	378.93	316.69	324.41	575.11	581.13	385.29	374.59	394.3	171.96	181.12	207.5	122.21	124.7	310.56	322.73	353.1	237.75	233.49	233.48	169.17	141.41	158.44	XP_022825035.1(S-adenosylmethionine synthase isoform X1 [Spodoptera litura])
TRINITY_DN61335_c1_g1	7.62272	2.93031	3.16e-09	5.37e-07	yes	up	0.346667	4.50765	0.44	0.27	0.25	0.25	0.56	0.31	2.99	1.72	2.67	4.57	4.31	5.44	2.77	3.61	4.49	2.53	3.89	7.27	6.53	14.54	3.54	2.8	2.96	XP_022829704.1(spondin-1-like isoform X2 [Spodoptera litura])
TRINITY_DN54944_c6_g1	0.0295257	-5.08188	3.21e-09	5.45e-07	yes	down	2.84	0.358824	0.71	6.29	5.82	1.09	2.39	0.74	0	0	0	0	0	0	0	0	6.1	0	0	0	0	0	0	0	0	None
TRINITY_DN67459_c0_g1	0.192941	-2.37377	3.23e-09	5.49e-07	yes	down	14.6333	4.09647	12.68	10.3	18.36	16.07	18.34	12.05	5.49	3.05	4.49	3.7	2.32	3.94	1.68	4.29	6.88	3.48	5.17	5.18	2.61	3.51	3.41	4.44	6	None
TRINITY_DN62531_c2_g1	4.78004	2.25702	3.23e-09	5.49e-07	yes	up	10.5517	82.68	9.36	14.37	4.67	13.4	11.47	10.04	68.01	63.86	75.63	56.01	71.09	62.42	95.78	73.83	90.17	97.12	102.97	77.49	75.12	82.12	119.48	110.17	84.29	PCG77573.1(hypothetical protein B5V51_6927 [Heliothis virescens])
TRINITY_DN36616_c0_g1	0.125543	-2.99375	3.26e-09	5.53e-07	yes	down	5.49	1.01471	4.41	2.67	10.97	6.65	4.41	3.83	3.1	3.4	1	0.64	0.52	0.35	0.79	0.59	1.33	0.64	0.57	0.84	0.49	0.61	0.93	0.97	0.48	XP_022825662.1(allantoicase-like [Spodoptera litura])
TRINITY_DN55772_c0_g2	0.169647	-2.5594	3.27e-09	5.55e-07	yes	down	24.4433	6.21235	30.94	26.3	23.63	19.94	20.26	25.59	8.35	4.62	2.26	3.07	6.59	2.39	11.59	2.41	6.7	5.59	8.05	3.57	9.91	3.93	15.84	5.62	5.12	XP_022814008.1(vitamin K epoxide reductase complex subunit 1 [Spodoptera litura])
TRINITY_DN45886_c0_g1	0.0105942	-6.56058	3.28e-09	5.55e-07	yes	down	13.37	0	14.63	30.58	5.63	12.66	6.89	9.83	0	0	0	0	0	0	0	0	0	0	0	0	0	0	0	0	0
TRINITY_DN58790_c0_g1	0.0355015	-4.81598	3.28e-09	5.56e-07	yes	down	112.268	5.62118	101.32	90.08	97.29	127.23	170.75	86.94	4.18	3.73	4.88	11.08	12.86	11.18	0.24	0.28	6.43	5.65	6.7	9.84	9.2	8.93	0.12	0.11	0.15	XP_022833324.1(nose resistant to fluoxetine protein 6-like [Spodoptera litura])
TRINITY_DN61930_c2_g4	0.0212533	-5.55617	3.29e-09	5.57e-07	yes	down	11.8967	0.328824	12.25	8.22	8.42	10.3	17.09	15.1	0	0.27	0.13	0.13	0	0	0.74	1.06	0	0	0	0	0	0	1.3	0.8	1.16	None
TRINITY_DN61258_c0_g1	0.307151	-1.70298	3.38e-09	5.72e-07	yes	down	18.5467	8.79176	15.8	12.25	21.89	23.72	20.14	17.48	12.36	11.78	13.26	4.84	5.36	7.42	4.26	7.52	14.05	10.99	12.27	6.69	7.11	7.04	7.72	7.66	9.13	XP_022814416.1(leucine-rich PPR motif-containing protein, mitochondrial [Spodoptera litura])
TRINITY_DN57493_c1_g4	0.0308898	-5.01673	3.4e-09	5.75e-07	yes	down	5.655	0.132353	6.09	5.27	6.42	11.84	1.6	2.71	0	0	0	0	0	0	0	0	0	0	2.25	0	0	0	0	0	0	XP_022828072.1(organic cation transporter protein-like [Spodoptera litura])
TRINITY_DN57119_c1_g8	7.53124	2.91289	3.41e-09	5.75e-07	yes	up	0.9	9.64706	1.09	0.71	0.82	1.2	0.87	0.71	7.51	4.35	6.03	8.98	8.55	11.31	4.9	11.73	8.62	8.51	7.96	12.41	10.02	12.9	14.15	13.69	12.38	None
TRINITY_DN59696_c0_g1	14.5133	3.85931	3.46e-09	5.83e-07	yes	up	1.76333	34.3612	1.3	1.24	0.61	2.32	4.35	0.76	36.86	23.5	44.07	51.45	50.56	40.79	11.49	18.14	39.7	44.09	49.05	42.18	42.13	55.12	9.99	11.5	13.52	XP_022816313.1(pancreatic triacylglycerol lipase-like [Spodoptera litura])
TRINITY_DN60734_c1_g1	0.00967766	-6.69113	3.56e-09	5.99e-07	yes	down	0.77	0	1.6	0.8	0.81	0.21	0.74	0.46	0	0	0	0	0	0	0	0	0	0	0	0	0	0	0	0	0	None
TRINITY_DN15716_c0_g1	7.79788	2.96308	3.57e-09	6.01e-07	yes	up	0.69	7.65647	0.53	0.55	0.67	0.56	0.83	1	5.59	6.61	7.05	10.83	10.34	8.97	3.99	4.07	10.52	8.1	8.04	10.55	8.93	10.11	3.98	8.48	4	XP_022826702.1(homeobox protein Nkx-2.2-like isoform X1 [Spodoptera litura])
TRINITY_DN63223_c1_g2	0.0554132	-4.17363	3.57e-09	6.01e-07	yes	down	1.28167	0.0958824	1.57	1.79	0.71	0.57	1.5	1.55	0.13	0	0.04	0.11	0.15	0.14	0.19	0	0.12	0.17	0.04	0.03	0.16	0.27	0	0	0.08	None
TRINITY_DN59452_c4_g5	7.66093	2.93752	3.57e-09	6e-07	yes	up	1.70833	19.9553	1.81	1.68	2.22	1.36	1.59	1.59	29.11	34.72	27.93	22.03	20.11	19.12	6.44	10.18	32.65	25.16	28	17.31	24.1	20.1	6.72	8.18	7.38	XP_022814277.1(aminoacylase-1-like isoform X2 [Spodoptera litura])
TRINITY_DN52304_c1_g1	0.0205164	-5.60708	3.58e-09	6.01e-07	yes	down	47.83	1.33059	38.08	44.47	44.69	48.88	70.02	40.84	0.45	0.48	0.48	0	0	0.41	2.58	3.92	0.27	0.07	0.07	0.17	0.46	0.38	3.78	4.87	4.23	XP_022818774.1(adhesive plaque matrix protein-like [Spodoptera litura])
TRINITY_DN13876_c0_g1	0.0133816	-6.22361	3.59e-09	6.03e-07	yes	down	86.2133	1.08235	69.48	100.26	0	0	132.02	215.52	0	0	0	0	0	0	0	0	0	0	0	0	0	0	0	0	18.4	XP_022822012.1(uncharacterized protein LOC111353286 [Spodoptera litura])
TRINITY_DN55061_c0_g1	0.00459287	-7.76639	3.62e-09	6.06e-07	yes	down	2.52667	0	2.34	2.3	7.85	0.43	0.27	1.97	0	0	0	0	0	0	0	0	0	0	0	0	0	0	0	0	0	None
TRINITY_DN55055_c5_g1	5.5538	2.47348	3.64e-09	6.09e-07	yes	up	8.455	63.0929	9.34	8.32	5.25	9.5	10.21	8.11	56.46	52.01	54.59	43.47	41.48	39.6	102.4	94.87	66.53	75.65	60.41	46.95	41.38	48.85	85.91	65.31	96.71	XP_022822830.1(uncharacterized protein LOC111353864 [Spodoptera litura])
TRINITY_DN51332_c0_g1	0.0113943	-6.45554	3.64e-09	6.09e-07	yes	down	0.826667	0	0.49	0.39	1.17	0.88	1.46	0.57	0	0	0	0	0	0	0	0	0	0	0	0	0	0	0	0	0	None
TRINITY_DN58915_c0_g1	0.034154	-4.8718	3.65e-09	6.1e-07	yes	down	1.28167	0.0505882	2.24	1.79	1.26	1.16	0.54	0.7	0	0	0	0	0	0.08	0	0.15	0	0	0	0.37	0	0	0	0.09	0.17	None
TRINITY_DN61391_c4_g1	4.48208	2.16417	3.69e-09	6.16e-07	yes	up	3.05167	13.9459	2.24	1.89	1.92	2.22	2.74	7.3	11.34	11.1	12.36	14.55	14.41	27.17	4.65	11	13.25	12.62	14.19	16.87	26.99	17.34	9.41	10.82	9.01	XP_022821797.1(toll-like receptor 4 [Spodoptera litura])
TRINITY_DN16881_c0_g1	0.157892	-2.66299	3.72e-09	6.21e-07	yes	down	31.3333	6.04941	29.18	23.7	26.95	30.4	40.72	37.05	4.3	5.07	2.62	6.62	4.4	10.91	4.9	8.74	4.93	4.96	10.7	7.28	5.84	7.73	6.26	5.08	2.5	XP_021200330.1(ras-related protein Rab-32 isoform X8 [Helicoverpa armigera])
TRINITY_DN59154_c4_g1	0.189898	-2.3967	3.72e-09	6.21e-07	yes	down	955.857	376.051	800.01	756.44	615.35	601.06	1570.89	1391.39	242.05	201.73	170.1	366.97	499.89	316	149.55	628.23	273.16	202.8	247.22	366.38	445.18	485.89	478.78	807.74	511.19	XP_022834159.1(uncharacterized protein LOC111361932 [Spodoptera litura])
TRINITY_DN49939_c0_g1	0.0368394	-4.76261	3.77e-09	6.29e-07	yes	down	0.24	0.01	0.04	0.1	0.34	0.13	0.42	0.41	0	0.03	0	0.03	0	0.05	0	0	0	0	0	0	0.03	0	0	0	0.03	None
TRINITY_DN7223_c0_g1	0.0260828	-5.26076	3.8e-09	6.32e-07	yes	down	59.8033	2.03706	64.45	60.65	61.74	48.6	72.95	50.43	0	0	0	0.8	1.75	0	4.75	3.25	0	0	0.95	0.75	0	0	6.19	9.06	7.13	None
TRINITY_DN36896_c0_g1	5.81104	2.5388	3.87e-09	6.45e-07	yes	up	0.916667	7.23294	0.88	0.67	1.24	1.06	0.87	0.78	4.38	3.79	4.15	8.04	7.86	9.93	6.54	6.89	5.78	4.72	6.21	8.75	7.34	10.01	9.55	10.23	8.79	XP_022814114.1(uncharacterized protein LOC111347940 isoform X1 [Spodoptera litura])
TRINITY_DN57910_c0_g1	4.34889	2.12065	3.89e-09	6.46e-07	yes	up	5.845	39.5659	5.64	6	5.55	6.79	5.92	5.17	35.88	33.27	39.93	45.56	44.42	41.7	30.94	28.85	45.04	44.01	44.84	50.96	40.55	50.88	30.73	36.76	28.3	XP_022815506.1(cysteine-rich hydrophobic domain-containing protein 2 [Spodoptera litura])
TRINITY_DN53720_c0_g1	0.0459545	-4.44365	3.9e-09	6.48e-07	yes	down	1.465	0.09	1.06	1.38	1.47	2.04	1.11	1.73	0.05	0.02	0.02	0.18	0.06	0.13	0.02	0.22	0	0	0	0.26	0.27	0.1	0.04	0.04	0.12	XP_022820123.1(uncharacterized protein LOC111352042 [Spodoptera litura])
TRINITY_DN60444_c0_g1	0.0121469	-6.36326	3.9e-09	6.48e-07	yes	down	0.385	0	0.41	0.35	0.41	0.27	0.25	0.62	0	0	0	0	0	0	0	0	0	0	0	0	0	0	0	0	0	XP_022817050.1(histidine decarboxylase isoform X3 [Spodoptera litura])
TRINITY_DN24525_c0_g1	0.0105199	-6.57073	3.91e-09	6.49e-07	yes	down	1.30333	0	0.85	0.43	1.44	1.18	1.05	2.87	0	0	0	0	0	0	0	0	0	0	0	0	0	0	0	0	0	None
TRINITY_DN32766_c0_g2	0.0443497	-4.49493	3.93e-09	6.51e-07	yes	down	37.135	2.13529	33.85	21.36	32.6	30.98	65.03	38.99	0.85	0.73	0.95	0.46	0.51	0.46	9.13	2.68	1.03	1.04	0.62	0.39	0.3	0.58	5.14	6.08	5.35	XP_022822062.1(apolipoprotein D-like [Spodoptera litura])
TRINITY_DN50040_c0_g1	642.399	9.32733	3.93e-09	6.51e-07	yes	up	0.00333333	4.18941	0	0	0	0	0.02	0	0.74	0.37	0.44	3.08	3.68	2.78	13.89	8.14	0.73	0.86	0.86	3.18	2.61	2.33	13.89	7.55	6.09	XP_022826090.1(4-coumarate--CoA ligase 1-like [Spodoptera litura])
TRINITY_DN59391_c1_g1	0.203525	-2.29672	3.96e-09	6.56e-07	yes	down	1678.34	405.235	1531.27	1759.56	1859.04	1493.47	1358.79	2067.89	300.36	263.78	321.02	724.51	693.56	690.57	314.28	157.23	355.84	318.33	345.92	610.18	535.22	709.2	186.42	191.51	171.07	ABF51445.1(tropomyosin isoform 5 [Bombyx mori])
TRINITY_DN32395_c0_g1	0.150425	-2.73289	4e-09	6.62e-07	yes	down	22.6467	4.96176	25.19	19.88	30.99	21.35	19.51	18.96	6.7	5.4	6.27	2.87	1.4	1.59	3.75	8.45	5.06	4.77	6.21	1.64	2.36	2.23	8.44	8.26	8.95	None
TRINITY_DN64108_c9_g2	0.160932	-2.63547	4.01e-09	6.63e-07	yes	down	6.44833	1.47706	4.85	3.58	3.93	10.77	8.35	7.21	1.22	0.92	0.9	1.27	1.12	2.69	0.34	1.13	1.69	1.2	1.33	2.56	2.27	1.69	1.7	1.6	1.48	XP_022819092.1(uncharacterized protein LOC111351402 [Spodoptera litura])
TRINITY_DN57253_c0_g1	0.0257583	-5.27882	4.06e-09	6.71e-07	yes	down	6.35	0.221176	4.52	5.09	6.54	6.52	8.64	6.79	0	0.17	0	0.02	0.07	0	0.29	0.74	0.12	0.19	0.03	0.11	0.05	0.05	0.17	1.29	0.46	XP_021184774.1(uncharacterized protein LOC110372414 [Helicoverpa armigera])
TRINITY_DN62229_c1_g1	0.337274	-1.56801	4.2e-09	6.92e-07	yes	down	97.4633	34.4229	93.17	95.32	61.48	112.09	109.3	113.42	35.21	30.45	30.31	51.03	46.35	41.18	12.83	19.21	31.34	37.59	37.38	37.39	27.37	35.93	26.96	20.21	64.45	XP_022820831.1(MKRN2 opposite strand protein [Spodoptera litura])
TRINITY_DN59779_c10_g1	0.0494206	-4.33874	4.23e-09	6.97e-07	yes	down	91.7183	4.62824	108.47	102.4	64.54	61.2	136.01	77.69	6.44	0.8	21.72	10.87	0	7.21	0	6.66	7.49	0	0	3.34	0	0	1.57	0	12.58	None
TRINITY_DN36674_c0_g1	0.0337948	-4.88706	4.3e-09	7.08e-07	yes	down	2.815	0.0982353	0.99	3.22	4.44	2.34	4.16	1.74	0	0	0	0	0	0	0.14	0.14	0	0	0	0	0	0	0.46	0.63	0.3	None
TRINITY_DN52177_c0_g1	0.228183	-2.13173	4.31e-09	7.09e-07	yes	down	176.748	20.77	104.55	160.02	141.72	203.59	121.72	328.89	3.11	25.21	3.16	63.82	58.04	17.54	2.19	3.78	27.44	4.25	15.79	58.36	16.82	27.34	4.76	14.83	6.65	OWR45148.1(Troponin I [Danaus plexippus plexippus])
TRINITY_DN53086_c0_g1	0.269954	-1.88922	4.35e-09	7.15e-07	yes	down	35.245	14.0776	27.53	20.7	47.67	46.78	37.85	30.94	24.24	22.87	23.49	11.33	11.12	10.97	6.62	7.53	20.97	17.31	18.03	12.35	14.7	14.22	6.98	7.78	8.81	XP_022832468.1(ATPase family AAA domain-containing protein 3A homolog [Spodoptera litura])
TRINITY_DN61455_c1_g1	0.0128437	-6.28279	4.43e-09	7.28e-07	yes	down	5.13833	0	4.43	5.03	4	4.34	7.06	5.97	0	0	0	0	0	0	0	0	0	0	0	0	0	0	0	0	0	None
TRINITY_DN59387_c3_g4	0.0348753	-4.84165	4.53e-09	7.43e-07	yes	down	0.518333	0.0247059	0.5	0.24	0.7	0.38	0.61	0.68	0	0	0	0	0	0	0	0.04	0	0.05	0.04	0	0	0	0.14	0.08	0.07	PCG62823.1(hypothetical protein B5V51_13569 [Heliothis virescens])
TRINITY_DN62630_c1_g1	13.5289	3.75797	4.54e-09	7.45e-07	yes	up	0.3	5.86824	0.29	0.4	0.49	0.29	0.09	0.24	5.69	7.66	4.13	9.23	10.51	9.81	1.61	2.51	6.74	5.71	4.75	8	7.81	9.04	2.81	2.1	1.65	XP_022827870.1(solute carrier family 22 member 1-like [Spodoptera litura])
TRINITY_DN158641_c0_g1	0.0454955	-4.45813	4.55e-09	7.45e-07	yes	down	19.56	1.20765	37.57	0	21.79	25.19	25.39	7.42	0.34	0.64	0.92	0.58	2.72	1.08	0.29	0.84	2.52	0.34	0	2.93	0.31	2.39	1.23	2.52	0.88	None
TRINITY_DN57983_c0_g4	0.0070295	-7.15236	4.57e-09	7.49e-07	yes	down	22.8467	0.228235	30.46	28.87	29.85	18.49	10.14	19.27	0	0	0.04	0.24	0.19	0.1	0	1.42	0.03	0.02	0.01	0.07	0.05	0.02	0.01	0.01	1.67	XP_022830297.1(lipase 3-like [Spodoptera litura])
TRINITY_DN62777_c0_g2	0.262228	-1.93111	4.57e-09	7.49e-07	yes	down	30.6167	11.7112	24.14	31.19	33.07	35.92	33.26	26.12	16.39	16.97	13.6	6.64	9.78	10.32	15.6	11.44	11.67	9.39	12.92	10.94	10.42	10.66	13.49	9.6	9.26	XP_022827214.1(diamine acetyltransferase 2-like [Spodoptera litura])
TRINITY_DN56472_c0_g1	0.0258347	-5.27455	4.59e-09	7.5e-07	yes	down	1.49667	0.0582353	1.3	0.68	0.07	1.4	3.35	2.18	0.05	0	0	0.22	0	0	0.1	0	0.16	0.05	0.05	0.13	0	0.19	0.04	0	0	XP_022814021.1(UDP-glucuronosyltransferase-like isoform X1 [Spodoptera litura])
TRINITY_DN63255_c3_g1	7.89256	2.98049	4.6e-09	7.52e-07	yes	up	46.2333	509.037	48.45	31.71	30.29	64.99	62.53	39.43	536.2	469.74	511.68	238.83	239.78	275.51	413.52	771.87	440.32	479.95	488.54	255.66	225.3	255.06	1113.4	1157.23	781.04	XP_022817682.1(synaptic vesicle membrane protein VAT-1 homolog-like isoform X1 [Spodoptera litura])
TRINITY_DN58593_c1_g2	0.10456	-3.2576	4.6e-09	7.51e-07	yes	down	712.29	105.172	619.99	493.96	831.22	1022.9	815.31	490.36	59.3	64.5	80.09	232.45	224.25	166.39	12.11	30.86	82.01	78.82	61.04	234.72	188.66	166.29	21.81	30.7	53.93	AKT26502.1(odorant binding protein 25 [Spodoptera exigua])
TRINITY_DN57352_c5_g1	0.0211754	-5.56147	4.61e-09	7.52e-07	yes	down	9.94	0.360588	10.68	8.87	9.98	12.19	8.04	9.88	0.67	0.85	0.81	0	0	0	0.08	0.24	1.06	0.69	0.92	0	0	0	0.21	0.47	0.13	XP_022831363.1(protein D3-like [Spodoptera litura])
TRINITY_DN63806_c1_g1	0.141183	-2.82436	4.62e-09	7.53e-07	yes	down	1.075	0.211176	0.81	0.95	0.95	1.01	1.52	1.21	0.1	0.15	0.11	0.16	0.2	0.17	0.22	0.1	0.22	0.17	0.41	0.06	0.2	0.34	0.3	0.4	0.28	None
TRINITY_DN58828_c0_g1	0.0077192	-7.01733	4.73e-09	7.71e-07	yes	down	112.562	1.15353	104.61	126.61	113.53	107.58	118.22	104.82	0.02	0.36	0.16	0.03	0.02	0	3.22	3.86	0.06	0.2	0.13	0.11	0	0.08	2.85	6.14	2.37	XP_022815006.1(retinoid-inducible serine carboxypeptidase-like [Spodoptera litura])
TRINITY_DN58399_c3_g1	0.245845	-2.02418	4.73e-09	7.71e-07	yes	down	38.21	9.85118	29.32	41.52	35.96	36.54	47.95	37.97	6.27	6.38	6.93	9.84	8.92	9.42	8.03	13.43	9.33	8.12	8.09	11.61	13.39	11.12	10.61	11.74	14.24	XP_022834091.1(probable G-protein coupled receptor Mth-like 3 isoform X1 [Spodoptera litura])
TRINITY_DN19074_c0_g1	0.0293405	-5.09096	4.76e-09	7.75e-07	yes	down	3.845	0.0905882	1.37	6.27	0.97	3.17	1.6	9.69	0	0	0	0	0	0	0.5	0	0	0	0	0	0	1.04	0	0	0	None
TRINITY_DN7981_c0_g1	0.0333711	-4.90526	4.86e-09	7.9e-07	yes	down	0.526667	0.0164706	0.72	0.17	0.32	1.09	0.19	0.67	0	0	0	0	0	0	0	0	0	0	0	0.16	0	0	0.06	0	0.06	None
TRINITY_DN62744_c0_g1	0.123192	-3.02102	4.87e-09	7.9e-07	yes	down	28.1667	3.54706	15.72	25.18	37.45	9.17	44.57	36.91	0.15	2.72	4.98	4.79	5.39	2.42	4.76	0.04	0.15	2.86	5.54	7.09	0.15	16.64	0.15	0.09	2.38	None
TRINITY_DN42531_c0_g1	66.5532	6.05644	4.88e-09	7.92e-07	yes	up	0.745	71.67	0.6	0.61	0.93	0.64	0.42	1.27	65.4	56.58	70.11	126.62	140.33	128.87	11.23	7.9	72.11	69.27	83.92	116.69	129.25	119.21	7.7	6.89	6.31	None
TRINITY_DN45567_c0_g1	0.0340017	-4.87825	4.92e-09	7.98e-07	yes	down	1.92333	0.0741176	1.27	1.51	2.07	1.79	2.98	1.92	0	0	0	0	0	0	0.13	0.59	0.27	0	0	0	0	0	0	0.27	0	XP_022820407.1(collagen alpha-1(XXVII) chain-like [Spodoptera litura])
TRINITY_DN59985_c0_g2	4.71341	2.23677	5.02e-09	8.13e-07	yes	up	10.29	59.6076	7.05	11.4	16.36	10.75	7.56	8.62	64.43	63.06	68.4	79.71	65.27	64.46	35.97	27.2	69.45	82.53	68.69	68.93	69.32	70.1	40.44	42.81	32.56	XP_022830268.1(selenium-binding protein 1-A [Spodoptera litura])
TRINITY_DN62053_c2_g1	8.11253	3.02015	5.09e-09	8.24e-07	yes	up	1.43833	17.7094	1.93	1.14	1.14	1.13	2.09	1.2	7.78	6.95	9.74	15.83	14.12	18.56	13.35	25.95	17.29	14.03	15.06	17.97	14.18	22.22	26.45	27.14	34.44	XP_022814176.1(uncharacterized protein LOC111347982 isoform X3 [Spodoptera litura])
TRINITY_DN47516_c0_g1	0.00714223	-7.12941	5.22e-09	8.45e-07	yes	down	118.302	0	119.13	217.46	45.45	8.69	135.89	183.19	0	0	0	0	0	0	0	0	0	0	0	0	0	0	0	0	0	XP_022821647.1(trypsin CFT-1-like isoform X1 [Spodoptera litura])
TRINITY_DN61017_c9_g1	0.111522	-3.1646	5.24e-09	8.47e-07	yes	down	300.302	43.49	289.25	273.28	272.29	260.73	260.1	446.16	22.4	14.18	57.55	56.97	116.21	41.86	52.1	26.03	20.53	88.11	34.88	30.92	57.98	60.84	22.13	36.44	0.2	OBS57962.1(hypothetical protein A6R68_10896, partial [Neotoma lepida])
TRINITY_DN63522_c3_g1	0.188632	-2.40635	5.26e-09	8.5e-07	yes	down	2.95333	1.63471	3.93	2.28	4.77	2.21	2.32	2.21	3.1	0.49	0.71	0.38	0.3	0.38	0.52	1.16	2.03	0.41	0.59	2.29	2.63	0.51	0.8	3.03	8.46	PCG76539.1(hypothetical protein B5V51_9240 [Heliothis virescens])
TRINITY_DN58499_c0_g3	0.0342629	-4.86721	5.26e-09	8.5e-07	yes	down	1.505	0.0523529	2.34	0.74	1.01	1.63	1.9	1.41	0	0.12	0	0	0	0.07	0.11	0	0	0.08	0	0	0	0	0.04	0.26	0.21	XP_022821406.1(cytochrome P450 4g1-like [Spodoptera litura])
TRINITY_DN62159_c0_g2	0.289645	-1.78764	5.29e-09	8.53e-07	yes	down	25.3383	10.1847	27.6	21.26	24.62	20.73	37.5	20.32	10.44	9.37	10.35	12.9	11.3	13.39	4.62	5.61	11.87	11.18	13.62	14.13	14.61	10.7	6.05	6.38	6.62	XP_022823307.1(methylcrotonoyl-CoA carboxylase subunit alpha, mitochondrial [Spodoptera litura])
TRINITY_DN6599_c0_g1	0.00316004	-8.30584	5.41e-09	8.72e-07	yes	down	5.785	0	9.35	1.54	3	0	13.16	7.66	0	0	0	0	0	0	0	0	0	0	0	0	0	0	0	0	0	None
TRINITY_DN45256_c1_g1	0.0095538	-6.70971	5.42e-09	8.73e-07	yes	down	3.78667	0	1.47	7.51	2.52	5.93	3.17	2.12	0	0	0	0	0	0	0	0	0	0	0	0	0	0	0	0	0	None
TRINITY_DN63575_c5_g2	0.0121422	-6.36383	5.42e-09	8.72e-07	yes	down	18.9033	0	13.06	19.85	32.51	23.33	17.9	6.77	0	0	0	0	0	0	0	0	0	0	0	0	0	0	0	0	0	None
TRINITY_DN52234_c0_g1	0.0457964	-4.44862	5.49e-09	8.82e-07	yes	down	0.791667	0.0464706	0.67	0.83	1.59	0.35	0.72	0.59	0.16	0	0.05	0.05	0.13	0	0	0.2	0	0.05	0.05	0	0.05	0	0	0.05	0	OWR40668.1(e3 ubiquitin-protein ligase CCNB1IP1 [Danaus plexippus plexippus])
TRINITY_DN19232_c0_g1	0.147941	-2.7569	5.58e-09	8.97e-07	yes	down	46.5217	9.59588	57.24	34.15	41.33	47.82	65.94	32.65	4.46	4.84	4.02	10.52	10.48	9.13	4.98	26.99	6.6	5.5	6.96	5.76	7.78	6.76	16.67	15.6	16.08	None
TRINITY_DN63797_c1_g1	0.197184	-2.34238	5.65e-09	9.08e-07	yes	down	56.4867	16.5959	51.76	45	69.42	64.09	57.68	50.97	18.22	17.55	20.81	18.03	17.19	18.1	2.5	6.79	26.41	23.4	23.53	21.21	23.31	20.91	5.14	12.54	6.49	XP_022834789.1(ganglioside-induced differentiation-associated protein 1-like [Spodoptera litura])
TRINITY_DN50426_c0_g1	0.0415617	-4.5886	5.67e-09	9.09e-07	yes	down	1.07333	0.0917647	3.15	0.21	0.4	0.51	1.12	1.05	0	0.25	0.52	0	0.02	0	0	0.02	0	0.06	0.02	0	0.28	0.05	0.06	0	0.28	XP_022814860.1(nuclear receptor subfamily 2 group E member 1 [Spodoptera litura])
TRINITY_DN59006_c5_g3	0.0369729	-4.75739	5.71e-09	9.16e-07	yes	down	0.628333	0.237647	0.28	0.8	0.55	0.42	0.5	1.22	0	0	0	0	0	0	0	0	0	0	0	0	0	0.21	2.03	0.07	1.73	None
TRINITY_DN62787_c0_g1	0.18258	-2.4534	5.76e-09	9.23e-07	yes	down	19.5667	5.38529	29.89	14.61	15.5	14.1	27.75	15.55	7.25	7.73	7.01	10.68	4.24	5.34	0.45	2.24	8.7	6.46	8.2	5.54	5.62	6.32	1.64	2.09	2.04	XP_022819471.1(peroxisomal acyl-coenzyme A oxidase 3 [Spodoptera litura])
TRINITY_DN61817_c3_g1	0.121835	-3.037	5.78e-09	9.25e-07	yes	down	20.6917	3.61647	15.8	21.53	13.32	13.72	31.23	28.55	1.24	1.39	3.6	1.18	0.81	1.08	2.54	8.34	6.32	5.88	4.59	1.22	1.56	1.88	4.28	5.6	9.97	XP_022823577.1(hemicentin-2-like isoform X2 [Spodoptera litura])
TRINITY_DN28832_c0_g1	0.0326078	-4.93864	5.83e-09	9.33e-07	yes	down	1.08	0.0341176	0.22	0.67	1.95	0.83	1.41	1.4	0	0.44	0	0	0	0	0	0	0	0	0	0	0	0	0	0.14	0	None
TRINITY_DN131524_c0_g1	0.0359042	-4.7997	5.91e-09	9.44e-07	yes	down	0.405	0.00647059	0.27	0.21	0.39	0.48	0.26	0.82	0	0	0	0	0	0	0	0	0	0	0	0	0	0	0	0.11	0	None
TRINITY_DN49285_c0_g1	0.0115862	-6.43145	6.01e-09	9.59e-07	yes	down	0.803333	0	1.68	0.8	0.37	0.89	0.5	0.58	0	0	0	0	0	0	0	0	0	0	0	0	0	0	0	0	0	XP_022824830.1(mucin-2-like [Spodoptera litura])
TRINITY_DN63128_c1_g1	0.210454	-2.24842	6.09e-09	9.73e-07	yes	down	248.01	73.7976	247.54	319.83	211.75	273.65	213.17	222.12	44.41	38.64	40.57	130.23	114.92	109.97	56.86	21.93	56.93	47.48	60.99	116.49	118.03	114.3	59.07	32.48	91.26	XP_022814996.1(mitochondrial basic amino acids transporter-like [Spodoptera litura])
TRINITY_DN5552_c0_g1	0.0178486	-5.80804	6.13e-09	9.77e-07	yes	down	4.10167	0.1	7.2	4.83	5.84	0.24	3.14	3.36	0	0	0	0	0	0.08	0	0.63	0.1	0.26	0	0	0.05	0	0	0.05	0.53	XP_022831149.1(uncharacterized protein LOC111359753 isoform X1 [Spodoptera litura])
TRINITY_DN52325_c0_g1	0.230189	-2.11911	6.13e-09	9.77e-07	yes	down	31.8133	10.6571	32.95	30.8	28.31	28.86	31.95	38.01	8.48	8.46	9.77	12.35	13.59	15.51	3.96	7.8	11.96	8.91	13.29	17.44	15.92	15.09	5.26	4.78	8.6	XP_022827621.1(fumarylacetoacetate hydrolase domain-containing protein 2-like [Spodoptera litura])
TRINITY_DN61419_c1_g5	0.0272572	-5.19722	6.2e-09	9.87e-07	yes	down	0.618333	0.0123529	0.24	0.87	0	1.89	0.16	0.55	0	0.11	0.1	0	0	0	0	0	0	0	0	0	0	0	0	0	0	None
TRINITY_DN61578_c0_g1	0.0568926	-4.13561	6.3e-09	1e-06	yes	down	0.778333	0.0594118	0.67	0.29	1.39	0.64	1.15	0.53	0.12	0	0.11	0.03	0.17	0.09	0	0	0.04	0	0.15	0.06	0.07	0.1	0	0.07	0	None
TRINITY_DN60988_c0_g1	0.112744	-3.14888	6.41e-09	1.02e-06	yes	down	220.367	26.6341	166.83	163.11	259.59	221.08	319.63	191.96	15.32	10.96	12	11.82	17.21	21.92	24.76	44.08	27.14	18.25	11.77	15.24	26.53	12.06	62.23	56.99	64.5	XP_022818774.1(adhesive plaque matrix protein-like [Spodoptera litura])
TRINITY_DN68282_c0_g1	0.0104991	-6.57358	6.41e-09	1.02e-06	yes	down	1.05667	0	1.27	0.12	1.17	0.72	1.62	1.44	0	0	0	0	0	0	0	0	0	0	0	0	0	0	0	0	0	None
TRINITY_DN28999_c0_g1	393.673	8.62085	6.52e-09	1.04e-06	yes	up	0.265	148.552	0.21	0.41	0.44	0.17	0.25	0.11	58.91	65.17	60.29	314.45	319.28	255.39	3.45	12.31	156.36	95.88	115.7	349.93	372.36	323.33	14.04	5.59	2.94	XP_022817087.1(uncharacterized protein LOC111349957 [Spodoptera litura])
TRINITY_DN60008_c1_g1	0.249702	-2.00172	6.53e-09	1.04e-06	yes	down	51.9033	17.0106	51.18	26.55	57.1	69.7	61.83	45.06	27.04	20.27	20.09	17.19	22.03	22.42	6.51	8.16	21.25	25.76	16.93	15.18	17.4	18.75	11.5	9.27	9.43	XP_022827935.1(organic cation transporter protein-like isoform X1 [Spodoptera litura])
TRINITY_DN61175_c1_g1	0.0862898	-3.53467	6.65e-09	1.05e-06	yes	down	7.41833	1.10118	6.84	4.95	14.87	4.91	4.91	8.03	1.06	1.31	1.25	0.52	0.38	0.35	0	0	1.4	0.94	1.35	0.48	0.69	1.47	0	0.36	7.16	PCG78349.1(hypothetical protein B5V51_4526 [Heliothis virescens])
TRINITY_DN45884_c0_g1	0.260941	-1.93821	6.65e-09	1.05e-06	yes	down	124.945	48.0094	104.44	90.83	145.54	133.4	146.69	128.77	83.8	84.22	86.82	30.4	30.91	32.05	40.03	27.47	65.91	71.56	61.42	31.98	41.94	30.38	31.6	34.41	31.26	AAK72378.1(60S ribosomal protein L7/L12 precursor [Spodoptera frugiperda])
TRINITY_DN49306_c2_g1	0.012292	-6.34613	6.69e-09	1.06e-06	yes	down	7.10167	0	5.06	12.41	6.22	8.19	2.85	7.88	0	0	0	0	0	0	0	0	0	0	0	0	0	0	0	0	0	None
TRINITY_DN55686_c0_g1	0.143986	-2.796	6.73e-09	1.06e-06	yes	down	1.785	0.352941	1.5	1.73	0.46	1.83	2.69	2.5	0.22	0.19	0.26	0.59	0.25	0.12	0.38	0.29	0.34	0.81	0.65	0.27	0.28	0.4	0.27	0.41	0.27	XP_022822262.1(pancreatic lipase-related protein 2-like [Spodoptera litura])
TRINITY_DN82691_c0_g1	0.0512188	-4.28718	6.77e-09	1.07e-06	yes	down	4.41667	0.334706	5.13	3.29	4.02	5.6	4.28	4.18	0.58	0.59	0.74	0.03	0.05	0.06	0.27	0.52	0.34	0.36	0.31	0.01	0	0.02	0.74	0.59	0.48	XP_022828596.1(pro-resilin-like [Spodoptera litura])
TRINITY_DN43425_c0_g2	0.00996601	-6.64877	6.89e-09	1.09e-06	yes	down	11.5983	0	12.38	6.37	3.56	4.36	20.65	22.27	0	0	0	0	0	0	0	0	0	0	0	0	0	0	0	0	0	None
TRINITY_DN60423_c0_g1	29.5615	4.88565	6.9e-09	1.09e-06	yes	up	0.216667	10.3465	0.13	0.25	0.21	0.23	0.23	0.25	14.04	11.11	15.29	15.32	13.53	15.08	1.77	1.08	13.91	14.6	17.59	13.42	12.63	11.93	1.28	1.8	1.51	XP_022818096.1(uncharacterized protein LOC111350682 [Spodoptera litura])
TRINITY_DN47827_c1_g1	0.032126	-4.96011	7e-09	1.1e-06	yes	down	0.205	0.00529412	0	0.09	0.29	0.24	0.44	0.17	0	0	0	0	0	0.03	0	0	0	0	0	0.03	0	0	0	0.03	0	None
TRINITY_DN54888_c4_g5	0.0514742	-4.28001	7.01e-09	1.1e-06	yes	down	61.94	4.42353	78.09	62.2	35.32	43.62	122.1	30.31	7.33	11.99	2.17	4.19	9.39	8.17	0	0	0	5.05	2.47	4.06	11.97	8.41	0	0	0	XP_022826690.1(uncharacterized protein LOC111356522 [Spodoptera litura])
TRINITY_DN64108_c9_g1	0.162148	-2.62462	7.17e-09	1.13e-06	yes	down	27.1067	4.90588	16.12	11.11	14.23	50.32	21.1	49.76	22.07	1.57	1.77	2.13	3.8	9.08	0.28	1.94	2.22	1.62	3.14	2.95	3.8	8.82	10.6	1.74	5.87	XP_022819092.1(uncharacterized protein LOC111351402 [Spodoptera litura])
TRINITY_DN60433_c3_g1	0.0102207	-6.61236	7.19e-09	1.13e-06	yes	down	4.02667	0	3.13	7.92	1.84	7.21	1.87	2.19	0	0	0	0	0	0	0	0	0	0	0	0	0	0	0	0	0	None
TRINITY_DN64084_c12_g1	0.0388526	-4.68584	7.38e-09	1.16e-06	yes	down	99.0283	5.32176	84.13	78.19	117.14	113.77	129.96	70.98	5.23	4.96	4.21	9.26	12.45	8.56	0.74	0.35	6.16	3.85	8.72	8.48	8.19	9.18	0	0.13	0	XP_022833324.1(nose resistant to fluoxetine protein 6-like [Spodoptera litura])
TRINITY_DN52000_c0_g1	0.313745	-1.67234	7.47e-09	1.17e-06	yes	down	822.482	361.814	671.19	785.13	790.83	1010.48	713.38	963.88	339.4	317.44	370.76	280.94	287.8	251.7	523.25	387.95	412.46	443.99	386.26	314.4	296.3	275.17	526.1	308.34	428.57	XP_022824210.1(uncharacterized protein LOC111354828 [Spodoptera litura])
TRINITY_DN26813_c0_g1	0.0288755	-5.11401	7.56e-09	1.19e-06	yes	down	1.09833	0.0158824	0.2	0.72	0	1.26	1.51	2.9	0.27	0	0	0	0	0	0	0	0	0	0	0	0	0	0	0	0	None
TRINITY_DN58229_c3_g1	28.708	4.84338	7.64e-09	1.2e-06	yes	up	0.143333	5.95941	0.12	0.1	0.2	0.07	0.09	0.28	10.54	8.99	8.97	2.36	3.29	5.84	0.2	2.23	10.89	11.88	12.38	4.83	3.95	4.88	3.37	4.26	2.45	XP_022817435.1(protein doublesex [Spodoptera litura])
TRINITY_DN60111_c2_g1	0.0304472	-5.03755	7.65e-09	1.2e-06	yes	down	10.7183	0.447647	11.28	11.14	9.27	7.08	15.96	9.58	0.15	0.21	0.07	1.15	1.12	1.25	0	0	0.07	0.11	0.25	0.91	1.23	0.76	0.09	0	0.24	XP_022819758.1(estrogen sulfotransferase-like [Spodoptera litura])
TRINITY_DN61376_c2_g1	0.0313777	-4.99412	7.66e-09	1.2e-06	yes	down	14.7167	0.574118	11.87	4.34	5.78	6.28	21.52	38.51	0	0	0	0	0	0	1.85	0.93	0	0	0.56	0	0	0.96	1.02	2.08	2.36	None
TRINITY_DN53305_c0_g1	0.0325531	-4.94106	7.7e-09	1.2e-06	yes	down	0.211667	0.00588235	0.08	0.28	0.67	0.11	0.1	0.03	0	0	0	0	0.03	0	0	0	0	0.04	0	0	0	0	0	0.03	0	XP_022814980.1(acyl-CoA Delta(11) desaturase-like [Spodoptera litura])
TRINITY_DN63747_c1_g1	3.55817	1.83114	7.7e-09	1.2e-06	yes	up	18.3083	92.5353	15.56	26.22	9.41	14.46	25.14	19.06	63.09	59.76	66.18	100.21	103	99.09	101	61.02	106.16	88.43	105.29	116.95	106.53	120.98	93.2	87.81	94.4	XP_022837839.1(uncharacterized protein LOC111364988 isoform X4 [Spodoptera litura])
TRINITY_DN4460_c0_g1	26.9418	4.75177	7.79e-09	1.22e-06	yes	up	0.0333333	1.39176	0	0.03	0.03	0.09	0	0.05	1.42	0.94	1.13	1.9	1.51	2.04	0.49	0.65	1.9	1.06	1.08	1.9	1.87	1.82	1.46	1.25	1.24	XP_022819265.1(branchpoint-bridging protein-like [Spodoptera litura])
TRINITY_DN4781_c0_g1	0.0124022	-6.33326	7.82e-09	1.22e-06	yes	down	5.77167	0	4.14	9.4	4.24	9.44	2.36	5.05	0	0	0	0	0	0	0	0	0	0	0	0	0	0	0	0	0	None
TRINITY_DN63507_c16_g2	0.0355666	-4.81333	7.88e-09	1.23e-06	yes	down	9.60167	1.97235	8.73	0.58	5.94	22.6	16.21	3.55	0	0	0	0	0	0	0	0	5.45	0	0	0	0	0	17.41	5.86	4.81	None
TRINITY_DN49520_c0_g1	92.8412	6.53669	7.91e-09	1.23e-06	yes	up	0	3.37235	0	0	0	0	0	0	4.11	6.42	2.87	6.12	3.39	6.63	1.59	2.88	3.32	2.12	5.56	3.64	2.23	1.83	1.88	1.76	0.98	None
TRINITY_DN63252_c6_g11	12.5441	3.64893	7.97e-09	1.24e-06	yes	up	0.216667	3.81529	0.17	0.09	0.45	0.16	0.21	0.22	2.9	2.75	3.01	5.25	6.68	7.59	2.44	2.21	3.49	2.37	3.23	5.79	4.12	5.44	2.02	2.4	3.17	AQU42768.1(VP1 [Morris orbivirus])
TRINITY_DN35084_c0_g1	8.87225	3.1493	8.14e-09	1.27e-06	yes	up	0.675	8.01765	0.6	0.85	0.92	0.68	0.56	0.44	8.06	3.84	6.72	6.42	6.34	8.03	18.7	12.17	7.85	6.47	6.66	6.77	5.14	5.25	10.11	9.33	8.44	None
TRINITY_DN55888_c0_g1	0.155401	-2.68593	8.39e-09	1.31e-06	yes	down	138.92	30.1788	150.18	182.44	118.45	106.2	145.66	130.59	20.34	33.39	22.77	92.64	56.91	48.19	15.87	11.15	15.04	12.28	8.9	30.96	44.82	41.62	22	21.01	15.15	XP_022837655.1(serine protease inhibitor 2.1-like [Spodoptera litura])
TRINITY_DN35748_c0_g1	0.00378153	-8.04681	8.41e-09	1.31e-06	yes	down	3.89833	0	3.34	1.52	10.15	7.15	1.23	0	0	0	0	0	0	0	0	0	0	0	0	0	0	0	0	0	0	None
TRINITY_DN56339_c0_g2	0.0310407	-5.0097	8.45e-09	1.31e-06	yes	down	41.955	1.75471	42.69	40.25	35.54	42.06	45.82	45.37	0.12	0.02	0.3	0.55	1.04	0.62	3.66	3.45	0.62	0.24	0.16	0.88	0.42	0.21	4.23	7.92	5.39	XP_022816644.1(esterase E4-like [Spodoptera litura])
TRINITY_DN134757_c0_g1	0.1314	-2.92796	8.45e-09	1.31e-06	yes	down	2.225	0.414118	2.21	2.24	2.36	2.05	2.11	2.38	0.1	0.58	0.67	0.27	0.62	0.46	0.18	0.37	0.43	0.31	0.1	0.69	0.69	0.55	0.09	0.42	0.51	None
TRINITY_DN59374_c0_g2	462.85	8.8544	8.46e-09	1.31e-06	yes	up	0.005	4.23529	0	0.03	0	0	0	0	4.56	1.67	3.23	7.34	10.3	12.48	0.03	0.67	4.99	2.93	3.38	6.81	6.08	5.68	0.5	0.87	0.48	XP_022835129.1(acetylcholinesterase-like [Spodoptera litura])
TRINITY_DN58893_c3_g2	0.20931	-2.25629	8.63e-09	1.34e-06	yes	down	6.355	1.86824	8.21	5.52	9.68	2.96	5.75	6.01	0.93	1.15	1.32	2.11	2.15	2.27	1.1	4.34	2.54	1.91	1.84	1.98	1.25	2.22	0.95	0.97	2.73	XP_022836019.1(muscle calcium channel subunit alpha-1-like isoform X3 [Spodoptera litura])
TRINITY_DN52391_c0_g1	0.0598145	-4.06336	8.67e-09	1.34e-06	yes	down	57.3767	6.82824	50.97	56.12	80.82	80.03	29.11	47.21	3.71	3.9	2.57	16.09	10.46	10.68	0.4	0.75	7.39	4.53	9.37	12.99	18.41	11.27	0.19	2.75	0.62	XP_022830858.1(15-hydroxyprostaglandin dehydrogenase [NAD(+)]-like [Spodoptera litura])
TRINITY_DN61746_c1_g1	0.0766467	-3.70563	8.69e-09	1.34e-06	yes	down	0.93	0.214706	2.13	0.86	0.91	0.64	0.45	0.59	0.2	0.11	0.17	0.12	0.29	0.11	0.1	0.04	0.14	0	0.41	0.73	0.74	0.07	0.08	0.07	0.27	XP_021200730.1(short transient receptor potential channel 4-like [Helicoverpa armigera])
TRINITY_DN53423_c2_g1	0.00328476	-8.25	8.69e-09	1.34e-06	yes	down	7.9	0	3.66	0	15.89	17.57	9.28	1	0	0	0	0	0	0	0	0	0	0	0	0	0	0	0	0	0	None
TRINITY_DN52539_c0_g1	5.81466	2.5397	8.71e-09	1.35e-06	yes	up	2.20333	18.7924	2.24	2.13	1.57	2.02	2.96	2.3	20	18.58	23.25	10.06	12.74	10.56	14.12	12.59	25.62	28.55	26.14	15.88	15.27	16.68	25.83	24.1	19.5	XP_021194433.1(uncharacterized protein LOC110379212 isoform X2 [Helicoverpa armigera])
TRINITY_DN70016_c0_g1	0.0111928	-6.48128	8.73e-09	1.35e-06	yes	down	257.177	3.51647	262.56	246.69	216.1	207.75	344.53	265.43	0	0	0.73	0	0	0.66	26.08	10.5	0	0	0	0	0	0	6.11	10.17	5.53	XP_011557260.1(PREDICTED: uncharacterized protein LOC105388109 [Plutella xylostella])
TRINITY_DN54849_c1_g2	0.0302161	-5.04854	8.76e-09	1.35e-06	yes	down	1.12	0.06	1	0.92	0.75	1.07	1.18	1.8	0	0	0	0.03	0.27	0.25	0	0	0	0.03	0	0.04	0.28	0.12	0	0	0	XP_022818121.1(bile salt-activated lipase-like [Spodoptera litura])
TRINITY_DN42848_c1_g1	0.0122933	-6.34598	8.78e-09	1.35e-06	yes	down	4.15333	0	5.36	4.36	6.43	1.88	1.28	5.61	0	0	0	0	0	0	0	0	0	0	0	0	0	0	0	0	0	None
TRINITY_DN46932_c0_g1	15.0558	3.91225	8.81e-09	1.36e-06	yes	up	0.238333	5.20176	0.2	0.2	0.43	0.14	0.27	0.19	8.2	7.21	7.26	4.05	3.83	2.72	10.65	1.71	8.07	8.03	7.8	3.44	3.63	3.59	3.67	2.37	2.2	None
TRINITY_DN91008_c0_g1	0.0129463	-6.27131	8.99e-09	1.38e-06	yes	down	0.296667	0	0.37	0.29	0.26	0.44	0.34	0.08	0	0	0	0	0	0	0	0	0	0	0	0	0	0	0	0	0	None
TRINITY_DN24925_c0_g1	0.038658	-4.69309	9.16e-09	1.41e-06	yes	down	0.31	0.0141176	0.24	0.24	0.39	0.46	0.17	0.36	0	0	0	0	0	0.02	0.03	0.08	0	0	0	0	0	0	0.07	0.02	0.02	None
TRINITY_DN62635_c1_g1	17.4203	4.1227	9.18e-09	1.41e-06	yes	up	0.06	1.53588	0.12	0.01	0.02	0.05	0.09	0.07	1.23	1.21	0.95	1.07	0.98	2.01	0.24	1.06	2.25	1.7	2.53	2.07	2.2	2.61	1.87	0.99	1.14	None
TRINITY_DN58817_c4_g1	0.0762035	-3.714	9.19e-09	1.41e-06	yes	down	94.33	8.33353	124.63	141.94	61.51	60.16	95.63	82.11	2.79	2.58	2.67	3.07	3.17	2.49	18.59	21.54	2.57	2.74	3.16	2.88	2.29	3.03	12.56	38.12	17.42	XP_022832512.1(uncharacterized protein LOC111360669 [Spodoptera litura])
TRINITY_DN39768_c0_g1	0.0794288	-3.65419	9.23e-09	1.42e-06	yes	down	0.383333	0.0423529	0.39	0.48	0.27	0.38	0.55	0.23	0	0	0.06	0.06	0.05	0.03	0	0.06	0.08	0.01	0.04	0.04	0.04	0.02	0.08	0.04	0.11	XP_022832771.1(probable 3',5'-cyclic phosphodiesterase pde-5 [Spodoptera litura])
TRINITY_DN5242_c0_g1	0.0113094	-6.46633	9.29e-09	1.43e-06	yes	down	27.2067	0	37.38	39.65	10.89	47.03	6.88	21.41	0	0	0	0	0	0	0	0	0	0	0	0	0	0	0	0	0	None
TRINITY_DN36287_c0_g1	0.215229	-2.21606	9.31e-09	1.43e-06	yes	down	81.0367	24.1035	86.78	77.19	82.67	72.37	94.66	72.55	12.12	11.15	11.86	27.16	24.65	21.28	32.28	46.97	15.13	16.27	17.45	25.09	18.79	28.48	31.42	38.02	31.64	None
TRINITY_DN63952_c0_g1	0.191472	-2.38479	9.38e-09	1.44e-06	yes	down	114.647	31.3288	102.61	126.51	65.26	116.67	112.48	164.35	60.19	57.82	57.01	14.84	15.21	13.86	26.64	11.5	46.68	56.74	46.43	15.67	13.01	22.36	24.17	19.1	31.36	XP_022824220.1(putative fatty acyl-CoA reductase CG5065 [Spodoptera litura])
TRINITY_DN56270_c0_g1	0.129007	-2.95448	9.46e-09	1.45e-06	yes	down	2.79667	0.568235	9.52	1.41	0.79	0.96	1.31	2.79	0.17	0.09	0.15	0.2	3.32	0.37	0.28	0.07	0.06	0.09	0.16	0.19	0.19	0.19	0.35	3.61	0.17	XP_022835052.1(putative fatty acyl-CoA reductase CG5065 [Spodoptera litura])
TRINITY_DN54151_c0_g1	6.48379	2.69684	9.46e-09	1.45e-06	yes	up	1.49	14.7253	1.48	1.59	1.11	1.49	1.33	1.94	27.99	29.11	26.58	11.07	10.65	9.19	6.53	8.13	22.27	20.65	22.84	9.89	9.62	9.32	6.95	8.5	11.04	XP_022829687.1(tetraspanin-9-like isoform X1 [Spodoptera litura])
TRINITY_DN63078_c9_g2	6.97674	2.80255	9.53e-09	1.46e-06	yes	up	4.52167	44.7065	5.1	4.12	4.21	2	5.01	6.69	21.49	17	22.32	46.26	40.29	51.14	35.05	64.46	47.57	34.36	39.06	49.77	46.65	63.16	57	64.87	59.56	None
TRINITY_DN61624_c0_g1	0.263285	-1.9253	9.56e-09	1.46e-06	yes	down	38.01	15.0894	42.28	34.25	29.09	31.1	61.73	29.61	28.35	25.47	27.3	8.88	8.64	7.8	7.51	8.39	22.98	25.82	22.98	9.46	8.21	9.25	10.53	13.74	11.21	XP_022826628.1(uncharacterized protein LOC111356486 [Spodoptera litura])
TRINITY_DN34628_c0_g1	0.00450038	-7.79574	9.58e-09	1.46e-06	yes	down	1.26333	0	1.11	2.32	2.84	0.6	0	0.71	0	0	0	0	0	0	0	0	0	0	0	0	0	0	0	0	0	None
TRINITY_DN49428_c0_g1	0.00567913	-7.46011	9.65e-09	1.47e-06	yes	down	9.73833	0	11.74	11.07	22.09	7.06	0	6.47	0	0	0	0	0	0	0	0	0	0	0	0	0	0	0	0	0	None
TRINITY_DN61631_c1_g2	5.99256	2.58317	9.72e-09	1.48e-06	yes	up	35.2967	300.204	30.03	38.99	32.88	42.46	28.17	39.25	237.38	146.15	190.58	502.71	467.57	435.02	94.46	146.09	334.23	268.7	317.09	463.57	457.31	498.37	201.79	167.9	174.55	XP_022820694.1(clavesin-1 [Spodoptera litura])
TRINITY_DN55694_c5_g1	0.155768	-2.68253	9.87e-09	1.5e-06	yes	down	1.12	0.232353	0.72	1.3	0.99	1.98	1.17	0.56	0.26	0.23	0.2	0.06	0.17	0.32	0.09	0.22	0.19	0.22	0.17	0.34	0.23	0.11	0.35	0.26	0.53	XP_022833956.1(uncharacterized protein LOC111361788 [Spodoptera litura])
TRINITY_DN55987_c2_g1	0.0350662	-4.83377	9.89e-09	1.5e-06	yes	down	4.79	0.192941	8.83	4.33	2.98	4.04	4.49	4.07	0	0	0	0	0	0	1.32	0.52	0.29	0	0	0	0	0	0.28	0.87	0	XP_022825106.1(seminal metalloprotease 1-like [Spodoptera litura])
TRINITY_DN61797_c2_g1	0.408065	-1.29313	9.99e-09	1.52e-06	yes	down	385.228	229.631	323.28	507.57	366.39	421.34	224.54	468.25	254.13	211.38	280.07	191.3	170.36	166.73	232.15	264.16	330.79	287.69	295.55	176.97	158.77	168.15	248.64	241.04	225.84	ASO98034.1(cytochrome p450 CYP4G74 [Spodoptera exigua])
TRINITY_DN61452_c1_g1	0.151482	-2.72278	1e-08	1.52e-06	yes	down	17.9983	4.38235	22.97	16.21	15.32	20.26	19.48	13.75	7.53	5.99	9.93	3.06	6.45	4.84	0.29	1.57	6.1	8.22	6.98	3.69	2.77	3.17	1.61	0.89	1.41	XP_022828169.1(organic cation transporter protein-like [Spodoptera litura])
TRINITY_DN52135_c0_g1	0.0523019	-4.25699	1e-08	1.52e-06	yes	down	0.636667	0.0417647	0.51	0.28	0.04	1.88	0.66	0.45	0.03	0.05	0	0.07	0.04	0.08	0	0.02	0.02	0.03	0.05	0.1	0.02	0	0.13	0	0.07	XP_022826955.1(gustatory receptor for sugar taste 64f-like [Spodoptera litura])
TRINITY_DN60362_c2_g1	0.0125214	-6.31947	1.01e-08	1.53e-06	yes	down	1.69333	0	1.72	1.1	2.31	2.73	0.36	1.94	0	0	0	0	0	0	0	0	0	0	0	0	0	0	0	0	0	None
TRINITY_DN54914_c0_g1	0.0705566	-3.82508	1.01e-08	1.53e-06	yes	down	1.23	0.301176	1.14	0.84	0.91	1.04	1.1	2.35	0	0.29	0.88	0.56	0.35	0	0	0.16	0.37	0	0.19	0.29	0.51	0	0.03	0.36	1.13	None
TRINITY_DN146936_c0_g1	0.0133036	-6.23204	1.02e-08	1.54e-06	yes	down	0.246667	0	0.19	0.1	0.2	0.15	0.4	0.44	0	0	0	0	0	0	0	0	0	0	0	0	0	0	0	0	0	None
TRINITY_DN40639_c0_g1	0.00804062	-6.95848	1.02e-08	1.55e-06	yes	down	5.335	0	14.83	1.75	9.75	3.04	1.01	1.63	0	0	0	0	0	0	0	0	0	0	0	0	0	0	0	0	0	None
TRINITY_DN138639_c0_g1	0.0188772	-5.72721	1.03e-08	1.55e-06	yes	down	2.79833	0.07	3.17	2.51	2.23	2.91	2.77	3.2	0.04	0	0.02	0	0	0	0.19	0.09	0	0.02	0	0	0	0	0.27	0.44	0.12	XP_022824135.1(slit homolog 2 protein-like [Spodoptera litura])
TRINITY_DN62723_c1_g6	0.0124535	-6.3273	1.03e-08	1.56e-06	yes	down	1.37167	0	0.31	2.02	1.01	1.79	1.18	1.92	0	0	0	0	0	0	0	0	0	0	0	0	0	0	0	0	0	None
TRINITY_DN54828_c0_g1	0.288253	-1.79459	1.04e-08	1.58e-06	yes	down	9	3.85647	9.28	9.15	8.54	7.9	10.44	8.69	6.12	6.45	5.8	2.97	3.29	3.65	1.75	2.75	4.68	4.8	5.44	3.38	3.06	3.96	2.33	2.62	2.51	PCG74200.1(hypothetical protein B5V51_13672 [Heliothis virescens])
TRINITY_DN58093_c0_g1	0.032777	-4.93117	1.04e-08	1.58e-06	yes	down	1.43833	0.0570588	1.45	0.85	1.46	1.05	2.27	1.55	0.02	0	0.08	0	0	0.03	0	0.07	0.04	0.02	0	0.05	0	0	0.38	0.14	0.14	XP_022817196.1(homeobox protein Hox-A2 [Spodoptera litura])
TRINITY_DN59625_c0_g1	0.0710108	-3.81582	1.05e-08	1.58e-06	yes	down	2.12667	0.200588	1.47	1.14	2.35	2.51	2.53	2.76	0.14	0.25	0	0.64	0.12	0.63	0.11	0.11	0.06	0	0.19	0.32	0.06	0.42	0.06	0.24	0.06	None
TRINITY_DN57714_c0_g1	0.0252419	-5.30804	1.06e-08	1.59e-06	yes	down	1228.62	41.7406	1504.23	1763.6	947.08	1186.77	952.61	1017.44	22.99	18.94	12.03	71.02	61.56	75.48	0.87	0.47	56.59	30.37	38.81	101.25	79.61	137.18	0.43	1	0.99	ABR28478.2(beta-1,3-glucanase [Spodoptera frugiperda])
TRINITY_DN44063_c0_g2	0.0319727	-4.96701	1.09e-08	1.64e-06	yes	down	2.035	0.0282353	4.73	2.47	1.82	0	2.27	0.92	0	0	0	0	0	0	0	0.48	0	0	0	0	0	0	0	0	0	XP_022814931.1(uncharacterized protein LOC111348521 [Spodoptera litura])
TRINITY_DN157095_c0_g1	0.0676414	-3.88595	1.09e-08	1.64e-06	yes	down	1.345	0.124118	1.56	0.73	1.66	1.43	1.65	1.04	0	0.09	0.09	0.23	0.12	0.15	0	0.08	0.15	0.05	0.05	0.22	0.21	0.23	0.27	0.17	0	None
TRINITY_DN54569_c4_g1	0.0133576	-6.2262	1.1e-08	1.66e-06	yes	down	2.26	0	3.01	1.33	0.86	2.5	1.75	4.11	0	0	0	0	0	0	0	0	0	0	0	0	0	0	0	0	0	None
TRINITY_DN57979_c1_g1	3.95875	1.98504	1.1e-08	1.66e-06	yes	up	14.05	70.3365	14.91	15.25	13.26	11.96	15.22	13.7	94.47	94.04	108.01	50.22	58.84	48.68	65.78	44.14	87.82	101.19	93.99	62.31	66.39	63.27	48.34	51.86	56.37	XP_021185628.1(proteasome inhibitor PI31 subunit [Helicoverpa armigera])
TRINITY_DN61732_c0_g1	0.0506514	-4.30325	1.1e-08	1.66e-06	yes	down	2.325	0.169412	1.63	1.65	2.72	1.22	4.5	2.23	0.08	0.29	0.28	0.07	0.3	0	0	0	0.6	0.15	0.18	0.15	0.31	0.37	0	0.03	0.07	None
TRINITY_DN61610_c1_g1	0.082908	-3.59235	1.11e-08	1.67e-06	yes	down	9.36833	1.10647	10.71	7.36	22.98	1.41	5.2	8.55	3.33	0.4	0.19	0.4	0.09	0.54	0.38	4.43	1.17	0.66	0.78	0.51	3.13	0.18	1.25	0.23	1.14	None
TRINITY_DN53212_c0_g1	3.72343	1.89663	1.12e-08	1.68e-06	yes	up	2.12667	12.0206	2.12	1.53	1.9	1.94	2.45	2.82	14.67	14.14	14.98	9.47	10.06	12.72	6.41	9.83	16.11	13.45	15.27	12.71	10.61	13.83	9.71	10.41	9.97	XP_022814674.1(uncharacterized protein LOC111348327 isoform X2 [Spodoptera litura])
TRINITY_DN46619_c0_g1	0.040851	-4.61349	1.14e-08	1.71e-06	yes	down	0.696667	0.0335294	0.53	0.16	1.55	1.1	0.53	0.31	0	0	0	0	0	0	0.05	0	0.17	0	0	0	0.06	0	0.06	0.17	0.06	XP_022822011.1(fibroin heavy chain-like [Spodoptera litura])
TRINITY_DN22489_c0_g1	0.0122515	-6.3509	1.15e-08	1.73e-06	yes	down	1.345	0	1.03	0.35	1.27	1.69	3.07	0.66	0	0	0	0	0	0	0	0	0	0	0	0	0	0	0	0	0	None
TRINITY_DN61678_c3_g1	2.94323	1.5574	1.16e-08	1.73e-06	yes	up	25.41	103.411	25.19	20.43	24.28	30.39	29.24	22.93	102.03	90.4	133.93	112.1	96.82	98.5	39.89	108.8	111.99	106.67	115.99	109.78	103.31	110.63	103.99	116.14	97.02	XP_022815313.1(LIM domain only protein 7 isoform X1 [Spodoptera litura])
TRINITY_DN28248_c0_g1	0.130071	-2.94263	1.17e-08	1.74e-06	yes	down	48.8533	9.02059	38.95	38.54	61.84	63.3	54.21	36.28	9.46	3.47	6.4	13.27	9.02	13.79	1.02	10.53	20.22	9.89	8.53	10.66	13.79	12.47	3.43	2.35	5.05	WP_081103543.1(hypothetical protein [Streptococcus oralis])
TRINITY_DN61311_c1_g1	0.057316	-4.12492	1.19e-08	1.77e-06	yes	down	36.4933	2.91529	24.39	7.01	29.71	35.46	91.28	31.11	0.99	1.11	0.33	2.47	4.53	3.09	0.84	3.5	4.22	0.4	3.1	4.73	5.91	11.89	1.24	0.69	0.52	None
TRINITY_DN55092_c0_g1	0.0290604	-5.1048	1.2e-08	1.79e-06	yes	down	9.09833	0.998824	11.84	6.59	6.3	6.63	11.87	11.36	0.83	2.07	0.42	0	0	0.16	0.21	4.79	3	1.43	0.97	0.02	0	0.08	0.18	1.26	1.56	XP_022815130.1(spidroin-1-like [Spodoptera litura])
TRINITY_DN59090_c2_g1	0.0454006	-4.46115	1.21e-08	1.8e-06	yes	down	11446.4	718.445	11984.1	8597.89	11944.1	13776.8	12815.8	9559.7	629.4	672.97	640.77	1568.84	1338.15	1241.05	21.01	35.66	981.73	617.83	1007.4	1087.37	1364.58	963.92	10.15	17.78	14.95	XP_022825649.1(flexible cuticle protein 12-like [Spodoptera litura])
TRINITY_DN81626_c0_g1	0.0376726	-4.73034	1.21e-08	1.8e-06	yes	down	2.39833	0.0894118	1.29	3.3	0.55	1.05	5.67	2.53	0	0	0	0.3	0.62	0.28	0	0	0	0	0	0	0.32	0	0	0	0	None
TRINITY_DN51604_c4_g1	0.0407169	-4.61823	1.21e-08	1.81e-06	yes	down	0.555	0.0258824	0.47	0.8	0.47	0.97	0.39	0.23	0	0	0	0.1	0.05	0	0	0	0	0	0	0.09	0.15	0.05	0	0	0	None
TRINITY_DN61014_c1_g1	0.0357313	-4.80667	1.22e-08	1.81e-06	yes	down	3.43167	0.135294	3.24	3.45	5.76	3.29	2.21	2.64	0	0	0	0	0	0	0	0.3	0	0	0	0	0	0	0	1.69	0.31	None
TRINITY_DN49005_c0_g1	6.93345	2.79357	1.23e-08	1.83e-06	yes	up	3.61333	34.5788	2.71	3.66	4.37	3.84	4.38	2.72	24.89	22.25	28.48	35.99	37.5	39.02	72.28	35.44	33.52	30.34	31.49	37.97	19.56	46.55	28.12	34.21	30.23	None
TRINITY_DN157308_c0_g1	0.0358099	-4.8035	1.23e-08	1.83e-06	yes	down	0.515	0.0123529	0.26	0.51	0.56	0.46	0.42	0.88	0	0	0	0	0.21	0	0	0	0	0	0	0	0	0	0	0	0	None
TRINITY_DN108668_c0_g1	0.0131855	-6.2449	1.23e-08	1.83e-06	yes	down	1.12167	0	0.93	0.95	1.01	0.56	2.68	0.6	0	0	0	0	0	0	0	0	0	0	0	0	0	0	0	0	0	None
TRINITY_DN52829_c0_g1	0.0137487	-6.18456	1.26e-08	1.87e-06	yes	down	0.341667	0	0.47	0.43	0.44	0.41	0.12	0.18	0	0	0	0	0	0	0	0	0	0	0	0	0	0	0	0	0	None
TRINITY_DN59679_c3_g1	0.0261394	-5.25763	1.26e-08	1.87e-06	yes	down	45.7	1.59471	45.07	46.87	47.28	44.75	53.03	37.2	0.3	0.42	0.97	1.04	1.05	0.71	4.22	3.04	0	0	0.44	0.24	0	0	1.62	8.26	4.8	None
TRINITY_DN60695_c1_g2	0.0138147	-6.17765	1.27e-08	1.88e-06	yes	down	1.035	0	0.76	0.3	1.1	1.47	0.86	1.72	0	0	0	0	0	0	0	0	0	0	0	0	0	0	0	0	0	None
TRINITY_DN62262_c0_g1	0.024714	-5.33853	1.28e-08	1.89e-06	yes	down	1.005	0.0323529	1.29	0.79	2.55	0.03	0.62	0.75	0	0.04	0	0.02	0	0.03	0	0.26	0	0.02	0	0	0	0	0.04	0.02	0.12	XP_022816073.1(uncharacterized protein LOC111349261 [Spodoptera litura])
TRINITY_DN54872_c0_g1	13.763	3.78272	1.29e-08	1.91e-06	yes	up	0.101667	2.19471	0.11	0.16	0.2	0.06	0.05	0.03	1.84	1.3	1.88	1.86	2.82	2.19	3.4	1.89	2.46	2.34	2.31	2.11	1.63	2.22	3.09	1.63	2.34	None
TRINITY_DN71239_c0_g1	0.0135952	-6.20076	1.3e-08	1.93e-06	yes	down	0.935	0	1.61	0.68	0.62	1.33	0.33	1.04	0	0	0	0	0	0	0	0	0	0	0	0	0	0	0	0	0	None
TRINITY_DN57802_c0_g1	0.184006	-2.44217	1.32e-08	1.96e-06	yes	down	1.51	0.402353	1.19	1.2	1.86	1.42	2.06	1.33	0.44	0.39	0.69	0.2	0.3	0.56	0.21	0.2	0.48	0.63	0.68	0.35	0.57	0.38	0.31	0.24	0.21	XP_022823391.1(probable cytochrome P450 49a1 [Spodoptera litura])
TRINITY_DN57782_c0_g1	0.0196877	-5.66656	1.32e-08	1.96e-06	yes	down	6.2	0.165882	3.54	5.89	4.75	9.16	6.16	7.7	0	0	0.06	0.02	0.04	0	0.24	0.52	0.1	0.09	0.04	0	0	0	0.52	0.79	0.4	XP_022836509.1(glucose dehydrogenase [FAD, quinone]-like [Spodoptera litura])
TRINITY_DN53360_c1_g1	11.6739	3.54522	1.33e-08	1.96e-06	yes	up	1372.59	22581.9	1248.65	1424.74	1377.52	1150.82	1625.52	1408.26	12543.6	13784.3	16481.4	41045.7	39781	37732.6	5738.13	6094.08	16786.2	20669.7	23101.9	39972	49556.5	42490.6	7195.37	5472.96	5445.69	ADK46942.1(apolipophorin-III [Spodoptera exigua])
TRINITY_DN56951_c0_g2	0.011195	-6.481	1.34e-08	1.98e-06	yes	down	1.91	0	2.96	2.08	0.42	3	2.57	0.43	0	0	0	0	0	0	0	0	0	0	0	0	0	0	0	0	0	None
TRINITY_DN88103_c0_g1	0.0108935	-6.52039	1.35e-08	1.98e-06	yes	down	1.95	0	1.53	1.12	3.48	3.94	1.42	0.21	0	0	0	0	0	0	0	0	0	0	0	0	0	0	0	0	0	None
TRINITY_DN62076_c5_g1	0.0321819	-4.95761	1.35e-08	1.98e-06	yes	down	0.468333	0.0105882	0.42	0	0.23	0.15	1.12	0.89	0.1	0	0	0	0	0.08	0	0	0	0	0	0	0	0	0	0	0	KGQ12725.1(5-aminolevulinate synthase [Beauveria bassiana D1-5])
TRINITY_DN61525_c2_g1	6.45837	2.69117	1.35e-08	1.99e-06	yes	up	0.396667	4.70176	0.38	0.24	0.58	0.39	0.4	0.39	4.25	9.53	2.62	4.05	6.36	5.58	3.79	1.49	6.32	2.86	10.93	4.5	4.71	4.01	2.57	3.17	3.19	XP_023935384.1(protein turtle isoform X1 [Bicyclus anynana])
TRINITY_DN61469_c1_g2	0.363704	-1.45916	1.36e-08	2.01e-06	yes	down	41.75	22.1676	38.16	43.54	30.45	34.55	57	46.8	20.4	18.6	25.78	21.17	22.41	19.08	18.79	23.46	30.01	21.95	24.02	20.77	22.1	16.03	26.61	23.65	22.02	XP_022821622.1(poly(U)-specific endoribonuclease homolog [Spodoptera litura])
TRINITY_DN54807_c0_g1	0.10541	-3.24592	1.37e-08	2.01e-06	yes	down	2.07833	0.315882	2.09	1.06	1.29	2.37	3.17	2.49	0.13	0.32	0.3	0.31	0.34	0.71	0	0.04	0.41	0.23	0.45	0.4	0.61	0.38	0.1	0.36	0.28	XP_022837345.1(multiple C2 and transmembrane domain-containing protein isoform X1 [Spodoptera litura])
TRINITY_DN53368_c0_g1	79.2053	6.30752	1.37e-08	2.01e-06	yes	up	0.983333	115.474	1.17	1.65	0.34	0.69	0.8	1.25	93.5	111.8	87.19	212.81	207.32	194.94	35.41	1.95	138.76	108.99	97.87	268.03	175.93	199.72	8.68	3.5	16.66	None
TRINITY_DN53497_c1_g1	0.260498	-1.94066	1.42e-08	2.09e-06	yes	down	32.1017	11.9124	30.84	26.41	32.76	40.23	32.94	29.43	9.8	9.94	10.31	16.21	14.47	16.55	3.96	6.09	14.94	11.96	15.39	17.25	17.69	18.46	6.32	5.94	7.23	XP_022815888.1(uncharacterized protein LOC111349142 [Spodoptera litura])
TRINITY_DN67614_c0_g1	0.024225	-5.36736	1.44e-08	2.11e-06	yes	down	1.62667	0.0158824	1.23	1.43	6.56	0	0	0.54	0	0	0	0	0	0	0	0.27	0	0	0	0	0	0	0	0	0	None
TRINITY_DN61653_c2_g1	0.0961452	-3.37864	1.45e-08	2.12e-06	yes	down	36.0467	3.84588	34.71	33.84	30.9	36.97	48.82	31.04	1.9	1.34	2.45	2.38	2.67	2.01	17.51	4.36	1.44	2.5	1.43	2.96	2.08	2.52	5.26	2.7	9.87	XP_022835751.1(RING finger protein nhl-1-like [Spodoptera litura])
TRINITY_DN47675_c0_g1	0.211922	-2.2384	1.48e-08	2.16e-06	yes	down	25.7	7.78588	22.76	21.15	14.22	21.25	43.99	30.83	9	6.68	9.31	7.14	6.28	6.16	2.6	17.53	9.39	5.08	7.43	4.76	4.17	4.39	7.37	13.6	11.47	XP_022816316.1(multiple inositol polyphosphate phosphatase 1-like [Spodoptera litura])
TRINITY_DN73973_c0_g1	0.0373982	-4.74089	1.49e-08	2.17e-06	yes	down	0.858333	0.0317647	0.73	1.37	0.8	0.89	0.41	0.95	0	0.41	0	0.13	0	0	0	0	0	0	0	0	0	0	0	0	0	None
TRINITY_DN58826_c5_g1	0.0301133	-5.05345	1.49e-08	2.19e-06	yes	down	7.305	0.268824	4.47	2.61	16.85	8.25	0.62	11.03	0	0	0	0.52	0.81	0	0	0	0	0.31	0	0	0	0.27	0	0.56	2.1	KPC97162.1(Cell wall-associated hydrolase [Geobacillus sp. BCO2])
TRINITY_DN41803_c0_g1	0.0421692	-4.56767	1.51e-08	2.21e-06	yes	down	27.75	1.98235	30.33	33	17.52	18.97	48.14	18.54	0	0	2.35	5.34	1.25	0.7	0	0	0	4.42	0	12.27	0	4.94	2.43	0	0	None
TRINITY_DN63575_c5_g1	0.0140377	-6.15455	1.52e-08	2.22e-06	yes	down	0.34	0	0.63	0.11	0.39	0.42	0.31	0.18	0	0	0	0	0	0	0	0	0	0	0	0	0	0	0	0	0	None
TRINITY_DN61012_c0_g1	0.213301	-2.22904	1.53e-08	2.24e-06	yes	down	11.9117	3.68294	9.95	8.08	12.78	12.22	16.95	11.49	2.4	1.63	1.79	4.01	3.37	2.85	1.75	4.48	3.34	2.85	3.37	3.13	4.15	4.4	4.92	9.65	4.52	XP_022815915.1(D-aspartate oxidase [Spodoptera litura])
TRINITY_DN46842_c0_g1	0.0134685	-6.21427	1.56e-08	2.28e-06	yes	down	1.89333	0	0.88	0.3	1.72	4.72	1.9	1.84	0	0	0	0	0	0	0	0	0	0	0	0	0	0	0	0	0	XP_022827024.1(uncharacterized protein LOC111356772 [Spodoptera litura])
TRINITY_DN63436_c5_g3	9.89278	3.30638	1.58e-08	2.3e-06	yes	up	1.43167	11.1647	0.69	0.54	1.91	1.47	2.05	1.93	14.89	15.97	15.36	8.22	5.91	12.99	5.43	5.4	16.74	14.08	15.23	14.6	11.17	12.63	8.6	7.23	5.35	PCG66527.1(hypothetical protein B5V51_7598 [Heliothis virescens])
TRINITY_DN59747_c6_g1	0.205634	-2.28185	1.58e-08	2.3e-06	yes	down	10.845	2.68824	14.68	7.18	9.25	10.15	11.51	12.3	1.13	1.41	2.04	2.13	2.74	2.82	2.68	3.58	2.01	1.75	2.41	3.48	2.25	2.71	4.73	2.91	4.92	XP_022826301.1(transmembrane protein 135-like [Spodoptera litura])
TRINITY_DN61037_c0_g1	0.255338	-1.96952	1.61e-08	2.34e-06	yes	down	2.83333	1.04294	2.13	1.51	1.69	1.67	7.96	2.04	0.55	0.76	0.55	0.52	0.5	3.82	0.33	0.96	1.1	0.6	0.74	3.9	0.63	0.66	0.52	0.77	0.82	XP_022825970.1(fibril-forming collagen alpha chain-like [Spodoptera litura])
TRINITY_DN55062_c1_g2	0.0144853	-6.10927	1.61e-08	2.34e-06	yes	down	0.878333	0	0.34	0.4	1.22	0.83	1.2	1.28	0	0	0	0	0	0	0	0	0	0	0	0	0	0	0	0	0	ADF18552.1(endonuclease-reverse transcriptase [Bombyx mori])
TRINITY_DN55708_c6_g1	36.7592	5.20004	1.61e-08	2.34e-06	yes	up	3.03333	122.299	3.47	2.78	6.49	3.28	0.75	1.43	98.63	116.47	91.07	202.52	192.69	149.59	18.77	18.98	174.31	132.75	206.3	172.63	214.61	197.45	36.99	13.36	41.97	None
TRINITY_DN60091_c0_g1	4.30322	2.10542	1.61e-08	2.34e-06	yes	up	20.67	118.915	16.92	19.28	21.37	23.33	20.7	22.42	120.18	125.9	125.93	155.46	151.66	145.47	156.63	29.61	100.6	130.87	108.4	139.45	148.78	144.55	69.33	83.07	85.67	XP_022825182.1(angiotensin-converting enzyme-like isoform X1 [Spodoptera litura])
TRINITY_DN63339_c0_g3	0.34052	-1.55419	1.61e-08	2.34e-06	yes	down	23.3767	8.96059	20.98	20.21	28.38	24.78	25.32	20.59	7.86	7.46	6.55	8.18	10.56	15.03	2.27	7.19	9.8	8.91	12.7	15.06	9.13	13.75	4.75	5.88	7.25	XP_014365992.1(PREDICTED: plasma membrane calcium-transporting ATPase 3 isoform X6 [Papilio machaon])
TRINITY_DN21004_c0_g1	0.0151755	-6.04211	1.62e-08	2.35e-06	yes	down	0.321667	0	0.43	0.21	0.19	0.23	0.52	0.35	0	0	0	0	0	0	0	0	0	0	0	0	0	0	0	0	0	None
TRINITY_DN61659_c0_g1	9.14462	3.19292	1.62e-08	2.35e-06	yes	up	0.161667	2.53765	0.27	0.2	0.14	0.21	0.05	0.1	2.31	2.64	2.55	1.67	2.29	2.09	2.5	2.25	3.34	2.24	2.69	2.62	2.09	2.47	2.83	4.02	2.54	None
TRINITY_DN58285_c0_g1	4.19967	2.07028	1.63e-08	2.36e-06	yes	up	6.405	37.42	5.91	6.18	5.8	7.49	7.27	5.78	24.7	27.87	28.91	40.57	38.58	38.53	49.22	41.61	31.16	30.62	33.77	34.74	29.28	35.97	52.79	58	39.82	None
TRINITY_DN56389_c6_g1	0.0606361	-4.04368	1.65e-08	2.39e-06	yes	down	1.38167	0.12	1.24	1.3	1.69	1.75	1.25	1.06	0.24	0.28	0.16	0	0	0	0.15	0.05	0.16	0.35	0.28	0	0.16	0	0	0.05	0.16	None
TRINITY_DN61558_c1_g3	5.26008	2.39508	1.65e-08	2.39e-06	yes	up	1.76	13.3312	1.64	1.09	1.87	2.21	1.75	2	11.75	9.49	13.21	12.19	10.85	19.12	2.94	9.5	14.57	14.3	15.42	18	19.81	20.75	12.67	10.65	11.41	XP_022822539.1(MOXD1 homolog 1-like [Spodoptera litura])
TRINITY_DN142854_c0_g1	0.207759	-2.26702	1.67e-08	2.41e-06	yes	down	19.4217	5.95294	23.74	19.73	24.02	12.34	21.42	15.28	9.06	6.98	6.4	7.26	3.98	4.93	3.41	3.44	9.49	8.49	9.89	7.49	4.82	6.35	2.68	3.82	2.71	None
TRINITY_DN63993_c14_g1	0.0607178	-4.04174	1.67e-08	2.41e-06	yes	down	102.018	9.17294	76.26	76.07	71.15	73.46	212.72	102.45	26.3	2.35	10.61	8.21	4.59	2	0	0	20.28	19.77	14.38	15.73	14.05	8.23	9.44	0	0	None
TRINITY_DN31864_c0_g1	0.352822	-1.50299	1.68e-08	2.42e-06	yes	down	76.1033	38.2759	68.93	71.24	86.81	77.63	86.38	65.63	37.19	32.06	38.13	35.51	40.39	34.57	34.68	42.93	40.58	36.46	45.37	34.6	31.77	35.55	34.74	54.44	41.72	None
TRINITY_DN52200_c0_g1	0.296083	-1.75593	1.68e-08	2.43e-06	yes	down	68.6033	29.9318	73.23	50.42	87.45	77.03	72.6	50.89	50.29	44.34	47.25	24.57	22.66	22.53	15.89	18.27	43.99	39.65	45.88	23.38	25.97	25.03	17.02	20.45	21.67	None
TRINITY_DN49104_c0_g2	0.0391558	-4.67463	1.72e-08	2.47e-06	yes	down	1.67	0.0670588	1.29	1.51	1.83	2.21	1.53	1.65	0	0	0.26	0	0	0	0	0	0	0.88	0	0	0	0	0	0	0	None
TRINITY_DN47877_c0_g1	0.0461795	-4.4366	1.72e-08	2.48e-06	yes	down	1.08167	0.0582353	0.58	0.92	1.58	0.93	1.04	1.44	0	0.38	0	0	0.12	0.11	0	0	0	0.14	0	0	0	0	0.24	0	0	XP_022826720.1(uncharacterized protein LOC111356549 [Spodoptera litura])
TRINITY_DN57577_c1_g1	17.2759	4.11069	1.73e-08	2.49e-06	yes	up	0.736667	16.9741	0.69	0.81	0.83	0.78	0.76	0.55	9.72	10	9.19	27.97	30.37	34.71	6.23	5.04	10.21	8.7	9.04	32.99	40.23	32.67	7.44	7.51	6.54	XP_022818213.1(nucleolar protein 4 isoform X2 [Spodoptera litura])
TRINITY_DN60927_c9_g1	0.0435585	-4.5209	1.78e-08	2.57e-06	yes	down	0.888333	0.0417647	1.56	0.2	1.52	0.44	1.05	0.56	0	0.22	0	0.2	0	0	0	0	0	0	0	0.09	0	0	0.1	0.1	0	None
TRINITY_DN57218_c0_g1	0.0134147	-6.22004	1.79e-08	2.58e-06	yes	down	5.335	0	2.16	2.46	6.14	2.8	10.17	8.28	0	0	0	0	0	0	0	0	0	0	0	0	0	0	0	0	0	None
TRINITY_DN149442_c0_g1	0.014728	-6.0853	1.8e-08	2.58e-06	yes	down	0.826667	0	1.1	0.65	0.24	0.93	1.17	0.87	0	0	0	0	0	0	0	0	0	0	0	0	0	0	0	0	0	None
TRINITY_DN63452_c2_g2	0.286313	-1.80434	1.81e-08	2.6e-06	yes	down	157.675	46.8806	165.26	173.6	137.98	141.33	179.65	148.23	32.83	31.68	34.9	24.47	36.16	32.24	42.69	74.87	27.19	57.74	56.67	33.05	26.26	35.73	77.45	83.36	89.68	XP_022822385.1(myrosinase 1-like [Spodoptera litura])
TRINITY_DN62358_c0_g1	3.93965	1.97807	1.81e-08	2.6e-06	yes	up	1.78833	10.2665	2.11	1.38	1.48	1.29	2.91	1.56	11.68	11.5	11.61	10.08	9.96	11.08	4.94	7.46	12.68	12.43	13.01	10.51	9.76	12.76	8.45	9.21	7.41	XP_022835374.1(UPF0183 protein CG7083 isoform X2 [Spodoptera litura])
TRINITY_DN29046_c0_g1	0.0239996	-5.38084	1.82e-08	2.61e-06	yes	down	1.27833	0.0394118	1.09	1.29	0.99	0.87	2.01	1.42	0	0.04	0	0	0	0	0.16	0.14	0	0	0	0	0	0	0.11	0.18	0.04	AGO62006.1(cytochrome P450 CY321A8 [Spodoptera frugiperda])
TRINITY_DN58064_c4_g8	0.0481182	-4.37727	1.83e-08	2.62e-06	yes	down	4.29333	0.202941	3.59	1.36	4.53	7.64	3.61	5.03	0	0	0	0.66	0.71	0.63	0	0	0	0	0.78	0	0	0.67	0	0	0	None
TRINITY_DN55169_c0_g1	19.4899	4.28465	1.84e-08	2.64e-06	yes	up	0.0683333	1.92353	0.07	0	0.11	0	0.2	0.03	1.98	1.43	2.29	1.68	1.98	2.59	1.56	2.18	1.42	1.63	1.76	2.57	2.5	1.56	2.62	1.54	1.41	None
TRINITY_DN62176_c6_g1	0.479484	-1.06045	1.85e-08	2.65e-06	yes	down	222.963	156.137	206.08	209.94	236.67	233.38	230.8	220.91	249.08	227.24	222.86	114.34	111.43	119.79	154.94	117.65	186.9	182.78	192.54	126.11	106.26	127.34	139.14	135.4	140.53	XP_022819784.1(E3 ubiquitin-protein ligase HECW2 isoform X4 [Spodoptera litura])
TRINITY_DN156999_c0_g1	0.03018	-5.05027	1.85e-08	2.64e-06	yes	down	0.413333	0.0129412	0.5	0.24	0.29	0.07	0.68	0.7	0	0	0	0	0	0	0	0	0	0	0	0	0	0	0	0.22	0	None
TRINITY_DN57711_c1_g1	0.198084	-2.33581	1.85e-08	2.65e-06	yes	down	15.8683	4.54882	12.7	9.71	10.7	25.42	10.52	26.16	5.14	4.42	5.83	3.76	4.9	4.23	3.7	2.62	3.27	1.31	2.03	3.26	2.95	2.14	9.44	10.42	7.91	KPJ16236.1(Retrovirus-related Pol polyprotein from transposon TNT 1-94 [Papilio machaon])
TRINITY_DN48296_c0_g1	5.44387	2.44463	1.87e-08	2.67e-06	yes	up	3.92667	30.4124	3.45	2.72	4.16	4.76	4.07	4.4	24.56	18.62	19.11	28.89	25.77	35.98	10.06	36.72	29.73	22.61	25.65	35.98	26.84	58.53	38.31	43.22	36.43	XP_021198367.1(protein MEMO1 [Helicoverpa armigera])
TRINITY_DN58463_c9_g1	0.164467	-2.60413	1.9e-08	2.71e-06	yes	down	109.312	25.0294	124.05	126.64	72.43	105.94	111.31	115.5	30.78	29.94	33.96	7.55	8.53	6.4	52.51	34.02	27.73	27.73	27.61	7.08	8.21	7.45	23.76	64.06	28.18	XP_022837391.1(zinc finger protein 652-like isoform X2 [Spodoptera litura])
TRINITY_DN56521_c2_g4	0.0297347	-5.07171	1.94e-08	2.76e-06	yes	down	0.953333	0.0235294	0.23	2.87	0	1.21	0.89	0.52	0	0	0	0	0	0.25	0	0	0.15	0	0	0	0	0	0	0	0	None
TRINITY_DN53287_c0_g1	6.8217	2.77013	1.94e-08	2.77e-06	yes	up	0.413333	4.02765	0.42	0.35	0.56	0.32	0.42	0.41	3.66	3.69	3.67	4.68	4.97	7.23	1.65	1.62	4.48	3.77	4.38	6.93	5.89	5.86	2.01	2.08	1.9	XP_021182813.1(neither inactivation nor afterpotential protein C isoform X2 [Helicoverpa armigera])
TRINITY_DN34029_c0_g1	0.0565998	-4.14306	1.95e-08	2.77e-06	yes	down	1.84667	0.135294	2.06	0.81	1.78	1.73	2.23	2.47	0.19	0.53	0	0.16	0	0.15	0	0	0	0.57	0.19	0	0	0.34	0.17	0	0	XP_022815780.1(uncharacterized protein LOC111349049 [Spodoptera litura])
TRINITY_DN12894_c0_g1	0.0304801	-5.03599	1.95e-08	2.77e-06	yes	down	0.778333	0.0164706	1.46	0.8	0	1.31	0.33	0.77	0	0	0	0	0	0	0	0	0	0	0	0	0.28	0	0	0	0	XP_021203563.1(uncharacterized protein LOC101740587 isoform X2 [Bombyx mori])
TRINITY_DN35692_c0_g1	0.091788	-3.44555	1.98e-08	2.81e-06	yes	down	4.17667	0.554118	3.46	2.79	3.07	3.86	5.63	6.25	0.29	0.63	0.58	0.61	0.74	0.79	0.03	0.07	0.65	0.84	0.99	1.16	0.61	1.15	0.14	0.06	0.08	XP_022828424.1(nose resistant to fluoxetine protein 6-like [Spodoptera litura])
TRINITY_DN55717_c9_g3	0.0638112	-3.97005	1.98e-08	2.82e-06	yes	down	141.545	14.3612	116.05	172.63	58.33	106.55	223.32	172.39	40.49	7.3	12.64	41.67	8.23	32.5	0	2.61	13.45	8.82	2.87	23.86	0	12.25	0	23.13	14.32	None
TRINITY_DN59812_c2_g1	0.29834	-1.74497	2e-08	2.84e-06	yes	down	16.3383	7.30824	16.5	11.27	18.12	12.62	16.63	22.89	11.64	10.27	11.47	4.26	5.39	5.84	3.28	9.63	8.4	8.36	7.79	6.13	5.22	5.33	4.51	5.49	11.23	XP_022830210.1(ethanolamine-phosphate cytidylyltransferase isoform X1 [Spodoptera litura])
TRINITY_DN63977_c51_g1	0.107165	-3.2221	2.02e-08	2.86e-06	yes	down	6.82833	1.5	6.65	5.79	6.85	5.59	8.93	7.16	0.28	0.76	0.47	2.12	2.76	3.13	0.44	0.34	0.6	0.33	0.55	2.38	3.46	6.58	0.47	0.64	0.19	XP_022831009.1(alpha-(1,3)-fucosyltransferase C-like isoform X1 [Spodoptera litura])
TRINITY_DN54965_c0_g2	10.9216	3.44912	2.03e-08	2.88e-06	yes	up	0.166667	2.15941	0.24	0.06	0.1	0.17	0.27	0.16	1.42	1.53	1.6	1.77	2.95	2.27	0.72	2.97	2.38	1.39	2.05	3.12	2.93	3.22	2.59	1.96	1.84	XP_022827968.1(prominin-1-A [Spodoptera litura])
TRINITY_DN10330_c0_g1	0.0125735	-6.31347	2.06e-08	2.91e-06	yes	down	0.728333	0	1.97	0.2	0.36	0.52	0.57	0.75	0	0	0	0	0	0	0	0	0	0	0	0	0	0	0	0	0	None
TRINITY_DN54002_c1_g3	0.200786	-2.31627	2.06e-08	2.92e-06	yes	down	28.42	9.60412	26.39	26.5	28.16	25.89	31.33	32.25	7.76	2.69	3.28	11.61	15.55	8.65	11.47	10.49	5.02	4.03	3.63	26.25	15.28	17.31	5.61	7.03	7.61	XP_022820600.1(uncharacterized protein LOC111352359 [Spodoptera litura])
TRINITY_DN120111_c0_g1	0.03576	-4.80551	2.08e-08	2.95e-06	yes	down	0.225	0.00411765	0.25	0.24	0	0.33	0.3	0.23	0	0	0	0	0	0	0	0	0	0	0.07	0	0	0	0	0	0	None
TRINITY_DN58410_c7_g2	0.0489509	-4.35252	2.09e-08	2.96e-06	yes	down	47.76	3.53471	34.88	39.07	62.08	51.49	42.71	56.33	7.45	5.95	6.32	3.27	4.34	2.98	0	0.4	6.53	6.14	5.5	4.43	3.3	3.12	0.13	0.18	0.05	XP_022816445.1(elongation of very long chain fatty acids protein AAEL008004-like [Spodoptera litura])
TRINITY_DN47367_c0_g1	0.140826	-2.82801	2.1e-08	2.96e-06	yes	down	1.64833	0.401765	1.35	2.1	1.99	1.85	1.42	1.18	0.5	0.23	0.17	0.56	0.54	0.55	0.33	0.36	0.74	0.08	0.33	0.82	0.18	0.4	0.11	0.46	0.47	None
TRINITY_DN59757_c1_g3	46.1334	5.52774	2.1e-08	2.97e-06	yes	up	0.0983333	6.68588	0.05	0	0.26	0.18	0.1	0	6.31	5.94	9.6	13.74	14.04	8.51	1.15	2.37	7.11	3.35	5.78	9.04	10.99	9.48	1.25	2.62	2.38	PCG72152.1(hypothetical protein B5V51_1102 [Heliothis virescens])
TRINITY_DN62824_c5_g1	0.17802	-2.48989	2.11e-08	2.98e-06	yes	down	4393.84	1153.36	4009.54	4273.26	4661.05	3882	3557.08	5980.12	718.99	689.95	668.08	1736.3	1974.75	1821.37	666.58	582.03	1384.94	1071.33	1090.51	1758.2	1713.62	2189.32	729.27	372	439.8	EFZ16118.1(hypothetical protein SINV_05747, partial [Solenopsis invicta])
TRINITY_DN49166_c0_g2	0.198921	-2.32973	2.12e-08	2.99e-06	yes	down	10.325	2.87176	9.9	11.08	10.19	10.63	11.37	8.78	1.34	1.74	1.45	4.82	4.33	3.98	2.11	2.13	2.9	2.25	2.88	3.4	4.38	4.22	2.3	2.7	1.89	XP_022824629.1(monocarboxylate transporter 9-like [Spodoptera litura])
TRINITY_DN59374_c0_g1	1193.05	10.2204	2.12e-08	2.99e-06	yes	up	0.01	25.2424	0	0.02	0	0.04	0	0	22.33	24.71	25.07	61.6	53.09	33.91	0.08	0.7	29.53	27.11	31.36	40.11	35.28	42.64	0.5	0.41	0.69	XP_022835128.1(LOW QUALITY PROTEIN: esterase E4-like [Spodoptera litura])
TRINITY_DN60214_c8_g2	177.954	7.47536	2.17e-08	3.06e-06	yes	up	0	1.57471	0	0	0	0	0	0	0.41	0.59	1.5	2.27	1.01	0.16	0.81	2.56	1.76	1.5	0.72	2.26	1.52	1.47	0.92	2.78	4.53	XP_022826761.1(uncharacterized protein LOC111356587 [Spodoptera litura])
TRINITY_DN56401_c2_g1	0.0112568	-6.47306	2.18e-08	3.07e-06	yes	down	2.21667	0	3.28	3.27	0.25	0.72	1.94	3.84	0	0	0	0	0	0	0	0	0	0	0	0	0	0	0	0	0	None
TRINITY_DN61737_c3_g2	0.216007	-2.21085	2.2e-08	3.09e-06	yes	down	512.675	146.317	373.65	433.8	511.35	704.87	605.59	446.79	217.7	160	148.93	80.45	158.34	104.31	69.02	166.27	135.44	194.11	223.94	238.1	151.39	185.23	59.96	110.04	84.16	XP_014354774.1(PREDICTED: RNA-directed DNA polymerase from mobile element jockey-like [Papilio machaon])
TRINITY_DN60409_c3_g1	0.383176	-1.38392	2.25e-08	3.16e-06	yes	down	40.145	22.3624	47.98	37.35	34.56	38.71	51.94	30.33	29.29	27.35	29.95	16.99	17.42	22.45	9.12	19.73	29.89	28.46	28.62	22.89	19.15	23.53	15.75	18.08	21.49	XP_022825120.1(myosin heavy chain 95F isoform X1 [Spodoptera litura])
TRINITY_DN49717_c0_g2	0.114093	-3.13172	2.25e-08	3.16e-06	yes	down	3.58	0.56	2.06	3.56	3.82	4.43	3.21	4.4	0.37	0.43	0.17	1.02	0.95	0.43	0.7	0.58	0.42	0.45	0.88	0.43	0.24	0	0.48	0.83	1.14	XP_022818117.1(melanocyte-stimulating hormone receptor-like isoform X2 [Spodoptera litura])
TRINITY_DN18645_c0_g1	0.0150568	-6.05345	2.29e-08	3.22e-06	yes	down	0.626667	0	0.33	0.3	0.9	0.97	0.98	0.28	0	0	0	0	0	0	0	0	0	0	0	0	0	0	0	0	0	XP_022825008.1(membrane alanyl aminopeptidase-like isoform X2 [Spodoptera litura])
TRINITY_DN60737_c1_g1	0.0331557	-4.9146	2.33e-08	3.27e-06	yes	down	12.5717	0.565294	12.58	16.64	9.74	13.96	8.05	14.46	0.15	0.09	0.45	0	0.21	0.31	1.67	1.28	0	0	0.05	0.23	0.13	0.3	0.77	1.63	2.34	XP_022827203.1(lactase-phlorizin hydrolase-like [Spodoptera litura])
TRINITY_DN58304_c0_g1	10.3089	3.36582	2.36e-08	3.3e-06	yes	up	0.23	3.37882	0.05	0.26	0.29	0.3	0.11	0.37	2.87	2.8	2.82	2.95	2.4	2.48	3.74	5.19	3.34	2.64	2.97	3.35	1.66	2.36	4.99	5.56	5.32	XP_022837059.1(facilitated trehalose transporter Tret1-like [Spodoptera litura])
TRINITY_DN54247_c2_g2	0.0129445	-6.27152	2.38e-08	3.34e-06	yes	down	4.175	0.0741176	4.21	3.94	4.19	1.9	4.53	6.28	0.01	0.03	0.02	0	0.01	0.01	0.05	0.15	0	0	0	0	0	0.03	0	0.89	0.06	XP_022814871.1(uncharacterized protein LOC111348478 [Spodoptera litura])
TRINITY_DN17923_c0_g1	0.0168599	-5.89026	2.39e-08	3.34e-06	yes	down	0.258333	0	0.31	0.23	0.34	0.17	0.23	0.27	0	0	0	0	0	0	0	0	0	0	0	0	0	0	0	0	0	None
TRINITY_DN60492_c2_g1	0.257425	-1.95777	2.39e-08	3.35e-06	yes	down	17.86	6.76765	16.52	14.39	12.25	20.43	24.23	19.34	2.85	4.34	5.15	6.4	7.8	7.55	1.72	5.83	6.95	6.71	7.77	7.22	6.85	7.29	12.39	9.32	8.91	XP_022834095.1(probable G-protein coupled receptor Mth-like 3 isoform X4 [Spodoptera litura])
TRINITY_DN61293_c4_g1	10.8589	3.4408	2.41e-08	3.36e-06	yes	up	2.35	5.41588	8.82	5.13	0.05	0.05	0.02	0.03	12.28	6.77	10.68	6.6	17.06	15.86	0.39	0.66	7.14	1.11	2.53	1.66	3.12	1.25	1.1	2.62	1.24	XP_021187219.1(aryl hydrocarbon receptor protein 1 [Helicoverpa armigera])
TRINITY_DN56007_c2_g1	0.154069	-2.69836	2.42e-08	3.39e-06	yes	down	15.08	4.05765	13.9	13.78	19.62	15.35	16.12	11.71	2.21	1.87	1.53	4.13	2.1	3.96	7.99	7.75	1.18	2	4.44	4.56	4.38	2.21	5.96	6.79	5.92	XP_022829589.1(cytochrome P450 4d2-like [Spodoptera litura])
TRINITY_DN60816_c1_g1	0.0166932	-5.90459	2.43e-08	3.39e-06	yes	down	0.991667	0	1.04	0.53	1.61	0.78	0.99	1	0	0	0	0	0	0	0	0	0	0	0	0	0	0	0	0	0	None
TRINITY_DN47968_c0_g1	5.21026	2.38136	2.48e-08	3.45e-06	yes	up	3.615	26.64	3.84	3.31	4.91	2.75	3.34	3.54	17.05	17.01	17.78	37.98	35.4	45.07	15.49	18.23	27.61	20.33	22.14	38.24	34.45	45.24	18.73	22.16	19.97	None
TRINITY_DN56629_c6_g1	0.29395	-1.76636	2.49e-08	3.47e-06	yes	down	95.4667	42.17	92.64	78.29	114.15	102.24	107.69	77.79	64.43	64.55	61.4	28.3	42.73	35.36	39.98	23.48	63.74	54.15	58.27	33.55	32.16	33.52	21.2	24.43	35.64	None
TRINITY_DN62360_c0_g1	0.0880342	-3.50579	2.53e-08	3.52e-06	yes	down	22.5383	2.81882	27.83	20.41	24.53	26.05	21.25	15.16	1.53	1.52	1.9	5.81	4.63	5.6	0.25	0.33	3.58	2.38	3.02	5.5	5.56	5.17	0.2	0.31	0.63	XP_022821492.1(uncharacterized protein LOC111352974 [Spodoptera litura])
TRINITY_DN26348_c0_g1	0.0582585	-4.10139	2.53e-08	3.52e-06	yes	down	4.37667	0.361765	2.49	2.46	6.49	4.27	2.85	7.7	0.42	1	0.44	0.56	0.25	0.09	0.05	0	0.33	0.59	0.39	0.46	1.05	0.47	0	0	0.05	XP_022824702.1(uncharacterized protein LOC111355171 [Spodoptera litura])
TRINITY_DN41154_c0_g1	0.0550454	-4.18324	2.53e-08	3.52e-06	yes	down	1.26	0.0947059	0.78	0.83	1.52	1.24	1.9	1.29	0.2	0	0.24	0.23	0.11	0	0	0.16	0.24	0	0.31	0	0.06	0	0	0.06	0	None
TRINITY_DN49428_c0_g2	0.00804691	-6.95735	2.53e-08	3.52e-06	yes	down	21.0767	0	26.96	28.78	43.7	12.28	0	14.74	0	0	0	0	0	0	0	0	0	0	0	0	0	0	0	0	0	None
TRINITY_DN60694_c0_g1	5.11501	2.35474	2.56e-08	3.55e-06	yes	up	8.485	64.6024	7.79	8.06	11.87	8.97	6.99	7.23	83.15	76.73	89.68	63.15	62.71	71.88	15.91	25.39	96.02	103.12	104.73	74.62	69.38	74.47	33.12	29.39	24.79	XP_022830201.1(glycogen-binding subunit 76A isoform X1 [Spodoptera litura])
TRINITY_DN50490_c0_g1	33.1658	5.05162	2.57e-08	3.57e-06	yes	up	0.138333	7.05235	0.1	0.23	0	0.3	0.09	0.11	5.32	9.34	8.76	7.53	11.77	10.88	5.63	0.53	7.14	8.37	9.67	11.42	8.01	9.08	2.72	2.42	1.3	None
TRINITY_DN56042_c0_g1	0.0734423	-3.76725	2.57e-08	3.57e-06	yes	down	35.57	3.69059	26.3	39.3	34.39	37.71	25.48	50.24	0.5	0.19	0.17	1.47	1.71	1.82	7.69	11.7	1.82	1.39	1.11	4.47	2	4.4	8.1	7.35	6.85	KPI98485.1(hypothetical protein RR46_03637 [Papilio xuthus])
TRINITY_DN57326_c1_g1	0.0947113	-3.40032	2.6e-08	3.61e-06	yes	down	6.33667	0.850588	6.89	6.51	5.14	4.12	7.51	7.85	0.34	0.63	0.47	1.66	1.64	1.13	0.14	0.65	0.86	1.28	1.23	1.78	1.1	1.28	0.12	0.05	0.1	XP_022823191.1(glycerophosphodiester phosphodiesterase GDPD6-like [Spodoptera litura])
TRINITY_DN57936_c0_g1	0.303547	-1.72001	2.61e-08	3.62e-06	yes	down	14.7583	6.29882	13.47	11.12	14.62	14.37	19.51	15.46	4.23	6.36	6.27	9.22	7.96	6.4	4.09	5.69	6.35	5.49	4.52	6.38	7.72	5.67	6.23	7.8	6.7	XP_022835997.1(uncharacterized protein LOC111363407 [Spodoptera litura])
TRINITY_DN71608_c0_g1	0.0362467	-4.786	2.62e-08	3.63e-06	yes	down	0.841667	0.0205882	0.29	0.51	0.47	2.58	0.55	0.65	0	0	0	0	0	0	0	0	0	0	0	0	0	0	0	0	0.35	None
TRINITY_DN55931_c1_g5	0.030639	-5.02849	2.63e-08	3.64e-06	yes	down	0.406667	0.0147059	1.75	0.19	0.25	0.07	0.05	0.13	0	0	0	0.03	0	0.1	0.03	0	0	0	0	0	0	0.03	0.06	0	0	PCG76206.1(hypothetical protein B5V51_10112 [Heliothis virescens])
TRINITY_DN50316_c0_g1	0.097163	-3.36345	2.63e-08	3.64e-06	yes	down	6.9	0.893529	2.73	2.77	14.73	10.44	2.79	7.94	0.43	0.89	0.71	0.74	0.82	0.07	2.49	0.62	1.19	1.62	0.33	0.2	0.77	0.76	1.22	1.56	0.77	XP_022834753.1(uncharacterized protein LOC111362322 [Spodoptera litura])
TRINITY_DN37268_c0_g1	22.3668	4.48329	2.65e-08	3.67e-06	yes	up	31.8567	1144.97	32.72	65.33	19.62	31.26	31.76	10.45	2021.18	2152.98	2574.87	443.3	467.17	618.78	94.44	352.29	2570.66	2717.14	2719.61	535.25	456.75	521.86	478.92	464.88	274.34	XP_022837130.1(apolipophorins isoform X1 [Spodoptera litura])
TRINITY_DN60709_c2_g2	0.0463132	-4.43243	2.66e-08	3.67e-06	yes	down	0.26	0.0129412	0.09	0.19	0.53	0.18	0.3	0.27	0.02	0.06	0	0	0	0	0	0	0.04	0	0.06	0	0	0	0.04	0	0	None
TRINITY_DN58867_c1_g1	0.21991	-2.18502	2.66e-08	3.67e-06	yes	down	107.198	32.64	89.73	103.94	88.51	130.06	153.21	77.74	41.24	30.73	36.56	16.56	14.06	16.83	69.53	30.5	23.6	27.73	32.25	14.83	20.95	20.22	54.5	66.47	38.32	XP_022816028.1(UDP-glucose 4-epimerase-like [Spodoptera litura])
TRINITY_DN146593_c0_g1	0.0169631	-5.88146	2.66e-08	3.67e-06	yes	down	0.35	0	0.27	0.51	0.29	0.34	0.32	0.37	0	0	0	0	0	0	0	0	0	0	0	0	0	0	0	0	0	None
TRINITY_DN43380_c0_g1	0.057177	-4.12842	2.67e-08	3.68e-06	yes	down	1.52167	0.120588	0.96	1.15	2.05	1.72	1.39	1.86	0.15	0	0.48	0.13	0.33	0.12	0	0	0.42	0.08	0.21	0.06	0.07	0	0	0	0	None
TRINITY_DN41417_c0_g2	0.0943886	-3.40524	2.69e-08	3.7e-06	yes	down	0.51	0.0652941	0.57	0.25	0.83	0.53	0.6	0.28	0	0.03	0.08	0.05	0.05	0.03	0	0.09	0.03	0.07	0.05	0.06	0.06	0.03	0.14	0.13	0.21	None
TRINITY_DN147611_c0_g1	0.00599495	-7.38204	2.69e-08	3.7e-06	yes	down	3.56	0	2.68	4.04	10.9	0.99	0	2.75	0	0	0	0	0	0	0	0	0	0	0	0	0	0	0	0	0	None
TRINITY_DN63964_c10_g1	0.0460588	-4.44038	2.71e-08	3.73e-06	yes	down	0.336667	0.00176471	0.27	0.32	0	0.71	0.26	0.46	0	0	0	0	0	0	0	0	0	0.03	0	0	0	0	0	0	0	None
TRINITY_DN62578_c0_g1	4.00478	2.00172	2.71e-08	3.73e-06	yes	up	0.646667	3.88353	0.68	0.43	0.8	0.65	0.74	0.58	3.52	2.95	3.76	3.79	3.46	4.93	2.39	3.61	4.66	3.77	4.26	4.19	4.09	4.58	4.31	3.8	3.95	XP_022819280.1(transmembrane protein 132B isoform X2 [Spodoptera litura])
TRINITY_DN56196_c1_g2	2.81784	1.49459	2.76e-08	3.79e-06	yes	up	6.77333	27.4118	7.11	5.1	6.88	6.43	9.03	6.09	27.33	24.16	26.79	25.34	24.18	28.75	16.71	26.27	31.97	28.6	30.8	28.74	28.34	35.95	26.23	29.74	26.1	XP_022834077.1(ubiquitin-conjugating enzyme E2 H [Spodoptera litura])
TRINITY_DN62500_c8_g8	0.0469237	-4.41354	2.77e-08	3.81e-06	yes	down	1.75833	0.0835294	1.42	0.83	1.97	1.4	1.59	3.34	0	0	0	0	0.07	0	0.15	0	0.16	0	0.62	0.42	0	0	0	0	0	None
TRINITY_DN63003_c0_g2	0.261328	-1.93606	2.78e-08	3.82e-06	yes	down	8.27333	3.06765	6.23	4.34	6.95	14.01	10.87	7.24	3.55	2.75	3.44	4.56	3.2	3.45	0.99	3.46	3.4	3.61	3.41	3.96	3.87	3.2	1.69	2.09	1.52	XP_022829962.1(multidrug resistance-associated protein 4-like [Spodoptera litura])
TRINITY_DN44599_c1_g1	0.124018	-3.01138	2.78e-08	3.82e-06	yes	down	5.02	0.889412	4.26	3.33	3.93	7.56	6.57	4.47	0.66	0.69	0.6	0.21	0.28	0.38	0.21	2.28	0.9	0.49	1.64	0.51	0.44	0.94	2.31	1.04	1.54	None
TRINITY_DN60513_c0_g3	0.0184071	-5.76359	2.79e-08	3.82e-06	yes	down	1.445	0.0364706	2.02	4.11	0.18	1.08	0.6	0.68	0.04	0	0	0	0	0	0.14	0	0	0	0	0	0	0	0.06	0.11	0.27	XP_022828849.1(juvenile hormone esterase-like [Spodoptera litura])
TRINITY_DN62781_c3_g4	0.138714	-2.84981	2.8e-08	3.84e-06	yes	down	626.01	120.687	546.09	636.56	526.9	850.6	668.32	527.59	40.44	70.03	70.08	84.18	49.31	71.28	189.5	261.33	69.83	54.11	87.47	67.7	50.15	63.76	264.62	199.83	358.06	None
TRINITY_DN41850_c0_g1	0.0487267	-4.35914	2.81e-08	3.84e-06	yes	down	10.7617	0.693529	13.81	11	11.52	10.59	12.69	4.96	0	0.83	0	2.6	0.39	0	0	0	0.41	0	1.75	1.03	2.01	0	0	1.64	1.13	None
TRINITY_DN56105_c0_g1	0.305592	-1.71032	2.82e-08	3.86e-06	yes	down	27.305	16.9524	22.06	21.72	31.85	28.22	32.43	27.55	8.56	6.48	10.12	14.04	12.38	13.84	7.51	5.65	26.61	26.49	32	30.98	29.94	30.62	12.68	13.42	6.87	XP_022837303.1(serpin B4-like [Spodoptera litura])
TRINITY_DN57146_c2_g1	0.161836	-2.6274	2.82e-08	3.86e-06	yes	down	1.1	0.240588	1.22	1.03	1.08	1.04	1.28	0.95	0.16	0.22	0.08	0.25	0.61	0.23	0.06	0.12	0.55	0.33	0.08	0.22	0.44	0.21	0.24	0.14	0.15	XP_022824748.1(neuroendocrine convertase 1-like isoform X1 [Spodoptera litura])
TRINITY_DN62680_c0_g1	0.196694	-2.34598	2.83e-08	3.86e-06	yes	down	4.83833	1.28706	4.95	3.06	5.05	5.59	5.84	4.54	1.8	1.44	1.36	0.46	0.38	0.66	1.88	2.04	1.3	1.06	1.15	0.58	0.48	0.59	2.69	1.92	2.09	XP_022820497.1(protein abrupt-like isoform X3 [Spodoptera litura])
TRINITY_DN61074_c3_g1	0.0437268	-4.51534	2.85e-08	3.9e-06	yes	down	26.365	1.55529	33.4	32.91	18.77	25.32	25.93	21.86	0.53	0.13	0.44	3.91	3.57	4.56	0.11	0.54	0.69	0.92	0.9	3.87	2.84	2.7	0.06	0.14	0.53	XP_022825174.1(uncharacterized protein LOC111355490 [Spodoptera litura])
TRINITY_DN58222_c3_g1	0.103249	-3.2758	2.86e-08	3.9e-06	yes	down	5.65833	0.809412	6.94	4.82	5.73	5.84	7.41	3.21	1.12	1.23	0.51	2.42	1.32	0.15	0.16	0.91	0.7	0.57	0.18	0.29	0.34	2.16	0.17	1.03	0.5	None
TRINITY_DN62490_c1_g2	5.44596	2.44519	2.87e-08	3.91e-06	yes	up	5.545	37.4935	5.72	4.41	3.64	8.12	6.7	4.68	20.14	20.73	18.78	38.81	41.75	51.84	12.58	35.84	36.83	30.77	37.81	49.92	42.63	50.66	49.85	61.47	36.98	XP_022814052.1(matrix metalloproteinase-2-like [Spodoptera litura])
TRINITY_DN44946_c0_g1	0.0515271	-4.27852	2.87e-08	3.91e-06	yes	down	2.17667	0.150588	2.67	1.98	1.99	1.21	2.92	2.29	0.1	0.29	0.38	0.18	0.58	0.23	0	0	0.18	0.19	0	0	0.43	0	0	0	0	None
TRINITY_DN49623_c0_g1	0.12474	-3.00301	2.87e-08	3.91e-06	yes	down	12.7333	2.25353	14.33	14.56	11.15	15.24	12.24	8.88	1.56	0.35	1.27	3.9	4.73	4.14	1.15	0.99	0.81	0.87	1.13	2.63	2.67	3.34	4.08	1.12	3.57	None
TRINITY_DN56213_c9_g6	32.8045	5.03582	2.87e-08	3.91e-06	yes	up	0.105	4.48882	0	0.22	0.12	0.12	0	0.17	4.19	3.73	3.32	8.5	10.04	8.26	3.05	2.06	2.6	2.74	3.19	7.42	4.8	4.95	2.64	2.77	2.05	None
TRINITY_DN58139_c1_g1	0.00826502	-6.91877	2.93e-08	3.98e-06	yes	down	0.273333	0	0.22	0.51	0	0.5	0.27	0.14	0	0	0	0	0	0	0	0	0	0	0	0	0	0	0	0	0	None
TRINITY_DN59040_c0_g1	13.5805	3.76346	2.94e-08	3.99e-06	yes	up	0.391667	7.79882	0.37	0.24	0.47	0.41	0.36	0.5	6.17	7.22	5.71	12.58	14.94	14.76	1.56	2.66	7.88	6.78	7.37	14.51	11	11.85	3	2.27	2.32	XP_022822862.1(cyclin-dependent kinase 5 activator 1 [Spodoptera litura])
TRINITY_DN53929_c0_g1	0.0570703	-4.13112	2.94e-08	3.99e-06	yes	down	1.49667	0.118235	2.33	0.99	1.92	0.78	1.5	1.46	0.04	0	0.02	0.05	0.03	0.02	0.07	0.51	0.09	0.02	0.13	0.06	0.02	0.05	0.2	0.24	0.46	XP_022814748.1(lipase member H-like [Spodoptera litura])
TRINITY_DN60877_c2_g1	602.087	9.23383	2.95e-08	4e-06	yes	up	0.313333	234.571	0.09	0.39	0.31	0.43	0.58	0.08	214.18	227.4	259.72	459.81	423.52	362.25	1.47	6.09	273.94	239	245.88	401.09	458.34	407.18	3.28	1.46	3.09	XP_022830750.1(aldose reductase-like [Spodoptera litura])
TRINITY_DN58747_c11_g5	0.150142	-2.7356	3e-08	4.08e-06	yes	down	9.55333	2.09059	8.97	7.95	7.82	12.64	12.05	7.89	2.77	4.13	2.1	0.99	0.41	1.1	0.78	4.15	3.44	0.7	2.05	1.27	1.05	1.64	2.92	3.41	2.63	None
TRINITY_DN54844_c0_g1	4.76028	2.25105	3.03e-08	4.11e-06	yes	up	17.4617	119.616	19.79	18.31	12.3	16.7	23.32	14.35	192.91	173.17	207.83	53.8	62.44	75.92	34.11	82.86	183.45	192.38	207.8	73.19	75.79	81.39	136.08	100.16	100.2	XP_022818196.1(digestive cysteine proteinase 2 [Spodoptera litura])
TRINITY_DN58416_c0_g1	22.1006	4.46601	3.07e-08	4.16e-06	yes	up	0.451667	14.7435	0.48	0.76	0.14	0.08	0.45	0.8	11.01	9.24	13.23	25.47	15.99	18.81	1.68	6.04	23.12	17.52	18.86	28.62	21.45	23.81	1.47	4.32	10	APD13874.1(putative carboxylesterase CXE12, partial [Spodoptera litura])
TRINITY_DN57790_c3_g2	0.0642866	-3.95934	3.11e-08	4.21e-06	yes	down	8.58833	0.747059	7.62	5.29	10.81	10.17	8.4	9.24	0.2	0.11	0.42	1.86	1.61	1.44	0.14	0.16	0.34	0.55	0.38	1.42	1.68	1.99	0.2	0.13	0.07	XP_022831894.1(luciferin 4-monooxygenase-like [Spodoptera litura])
TRINITY_DN54187_c0_g1	0.161088	-2.63408	3.12e-08	4.22e-06	yes	down	4.755	0.981765	5.74	5.22	1.81	5.11	5.52	5.13	0.67	0.71	0.68	1.27	1.61	1.58	1.06	0.23	0.76	1.12	1.53	1.27	1.38	0.9	0.57	0.98	0.37	XP_022112735.1(uncharacterized protein LOC110991609 isoform X1 [Pieris rapae])
TRINITY_DN47882_c0_g1	0.0156488	-5.9978	3.12e-08	4.22e-06	yes	down	13.235	0	17.95	9.08	4.25	21.33	8.21	18.59	0	0	0	0	0	0	0	0	0	0	0	0	0	0	0	0	0	None
TRINITY_DN111680_c0_g1	0.0342591	-4.86737	3.13e-08	4.23e-06	yes	down	0.471667	0.01	0.67	0	0.57	0.24	1.26	0.09	0	0	0	0	0.09	0	0	0	0	0	0	0.08	0	0	0	0	0	None
TRINITY_DN58778_c6_g4	0.016145	-5.95277	3.15e-08	4.26e-06	yes	down	0.53	0	0.61	0.18	0.5	0.4	0.45	1.04	0	0	0	0	0	0	0	0	0	0	0	0	0	0	0	0	0	None
TRINITY_DN60045_c2_g2	0.0172035	-5.86116	3.15e-08	4.26e-06	yes	down	1.14167	0	1.25	0.42	1.53	1.11	1.34	1.2	0	0	0	0	0	0	0	0	0	0	0	0	0	0	0	0	0	XP_022828097.1(circadian clock-controlled protein-like [Spodoptera litura])
TRINITY_DN161836_c0_g1	0.0659991	-3.92141	3.16e-08	4.26e-06	yes	down	0.871667	0.08	0.91	0.46	0.69	0.55	1.68	0.94	0.17	0.12	0.27	0.04	0.11	0.1	0	0.17	0	0.13	0.04	0.13	0.08	0	0	0	0	None
TRINITY_DN58982_c3_g1	0.0172108	-5.86054	3.2e-08	4.31e-06	yes	down	0.73	0	0.9	0.27	0.73	0.83	0.76	0.89	0	0	0	0	0	0	0	0	0	0	0	0	0	0	0	0	0	XP_022825712.1(trypsin, alkaline C-like [Spodoptera litura])
TRINITY_DN54074_c1_g1	10.0668	3.33153	3.2e-08	4.31e-06	yes	up	1.04333	14.4159	1.06	0.8	1.03	0.57	1.82	0.98	9.3	7.86	9.13	8.41	7.77	11.47	5.16	32.84	11.47	9.84	10.54	11.51	9.68	11.51	28.21	38.72	21.65	PCG68376.1(hypothetical protein B5V51_5294 [Heliothis virescens])
TRINITY_DN48508_c0_g1	0.031508	-4.98814	3.21e-08	4.32e-06	yes	down	0.561667	0.0164706	0.59	0.65	1.19	0	0.25	0.69	0	0	0	0	0	0	0	0.06	0	0	0	0.22	0	0	0	0	0	XP_022816225.1(glutathione S-transferase 1-like [Spodoptera litura])
TRINITY_DN50510_c0_g1	54.4309	5.76635	3.23e-08	4.34e-06	yes	up	1.75333	174.06	2.74	1.05	4.18	1.29	0.57	0.69	113.94	113.99	107.33	358.22	442.51	280.81	21.57	8.04	187.73	169.96	165.74	283.66	273.09	317.96	41.22	41.04	32.21	None
TRINITY_DN23334_c0_g1	0.0330916	-4.91739	3.23e-08	4.35e-06	yes	down	0.36	0.00411765	0.5	0	1.16	0.09	0.32	0.09	0	0	0	0	0	0.07	0	0	0	0	0	0	0	0	0	0	0	None
TRINITY_DN29494_c0_g1	0.017285	-5.85434	3.24e-08	4.35e-06	yes	down	1.40167	0	1.34	1.04	0.96	1.83	1.03	2.21	0	0	0	0	0	0	0	0	0	0	0	0	0	0	0	0	0	None
TRINITY_DN63348_c4_g1	0.485658	-1.04199	3.24e-08	4.35e-06	yes	down	275.487	200.875	244.91	269.86	236.98	315.35	319.11	266.71	293.61	266.74	287.64	181.59	160.45	160.1	104.26	159.17	259.33	258.83	271.37	161.34	165.48	173.09	162.52	175.43	173.92	XP_022815212.1(annexin B9 isoform X2 [Spodoptera litura])
TRINITY_DN57548_c5_g2	0.00999089	-6.64517	3.26e-08	4.38e-06	yes	down	0.661667	0	1.06	0.71	0.77	0	0.88	0.55	0	0	0	0	0	0	0	0	0	0	0	0	0	0	0	0	0	None
TRINITY_DN28603_c0_g1	0.044589	-4.48717	3.27e-08	4.38e-06	yes	down	0.615	0.0241176	1.36	0.43	0.49	0.48	0.62	0.31	0	0	0	0	0	0.1	0	0	0	0	0	0.2	0	0	0	0	0.11	None
TRINITY_DN54456_c0_g1	84.6964	6.40423	3.27e-08	4.38e-06	yes	up	15.5467	2848.51	2.51	55.1	0	17.66	0.78	17.23	1875.32	3797.28	1924.54	1962.44	883.05	880.75	1293.05	1202.55	1531.35	2833.99	3459.44	2253.49	2020.58	813.35	10598.1	5574.11	5521.22	XP_022819441.1(uncharacterized protein LOC111351647 [Spodoptera litura])
TRINITY_DN51225_c0_g1	0.0719658	-3.79655	3.29e-08	4.4e-06	yes	down	2839.7	278.821	2551.75	2771.51	2320.86	3407.27	2692.88	3293.94	38.31	43.46	39.31	157.44	140.53	100	694.28	944.37	82.52	74.58	90.86	136.98	82.59	125.7	676.75	785.68	526.6	None
TRINITY_DN64434_c0_g1	45.207	5.49847	3.4e-08	4.55e-06	yes	up	0.0283333	2.00412	0.04	0.03	0	0.05	0.05	0	2.75	3.25	5.25	1.52	1.17	0.97	0.84	0.27	4.93	4.09	3.77	1.5	1.2	1.13	0.36	0.53	0.54	XP_022837452.1(facilitated trehalose transporter Tret1-like [Spodoptera litura])
TRINITY_DN55895_c0_g1	0.340741	-1.55325	3.42e-08	4.58e-06	yes	down	35.1283	17.0347	25.5	30.88	43.56	40.31	36.6	33.92	23.91	23.75	25.97	16.34	16.54	15.23	15.39	13.72	17.15	15.96	17.32	13.74	12.21	11.98	16.56	19.16	14.66	XP_022814073.1(glutaryl-CoA dehydrogenase, mitochondrial [Spodoptera litura])
TRINITY_DN62066_c0_g1	3.5528	1.82896	3.43e-08	4.59e-06	yes	up	19.0333	97.9494	19.66	15.08	10.63	27.29	27.23	14.31	77.6	133.35	98.48	168.1	122.23	118.09	68.02	51.58	82.22	87.54	92.25	72.13	129	83.02	104.45	106.77	70.31	XP_022821383.1(facilitated trehalose transporter Tret1-like [Spodoptera litura])
TRINITY_DN47419_c0_g1	0.0501684	-4.31708	3.51e-08	4.68e-06	yes	down	5.70167	0.0858824	2.72	11.19	16.62	1.05	1.66	0.97	0	0	0	0	0.09	0.15	0.25	0.08	0.09	0	0	0	0	0	0.44	0.27	0.09	None
TRINITY_DN125062_c0_g1	23.2211	4.53737	3.51e-08	4.69e-06	yes	up	0.0633333	2.32059	0.06	0.07	0.13	0	0.12	0	1.96	2.94	1.64	2.7	3.8	3.66	1.88	0.68	1.17	1.18	3.01	3.64	2.57	3.76	2.03	1.92	0.91	None
TRINITY_DN30800_c0_g1	0.0166642	-5.9071	3.55e-08	4.73e-06	yes	down	0.928333	0	1	1.69	0.62	0.75	0.55	0.96	0	0	0	0	0	0	0	0	0	0	0	0	0	0	0	0	0	XP_013133131.1(PREDICTED: trypsin, alkaline C-like [Papilio polytes])
TRINITY_DN50930_c0_g1	5.34264	2.41755	3.6e-08	4.8e-06	yes	up	5.52167	19.1588	4.51	4.98	5.38	5.47	8.94	3.85	24.11	26.13	23.7	18.6	23.08	22.6	12.63	11.91	22.64	21.73	16.43	19.67	20.83	17.58	12.14	20.57	11.35	XP_022825366.1(carbonic anhydrase 7-like [Spodoptera litura])
TRINITY_DN53675_c0_g1	0.0791331	-3.65957	3.64e-08	4.86e-06	yes	down	1.125	0.120588	1.33	1.03	0.89	1.28	1.67	0.55	0.07	0	0.06	0.06	0	0.11	0.06	0.05	0.06	0.2	0.19	0.53	0.06	0.42	0.12	0.06	0	XP_022822010.1(uncharacterized protein LOC111353284 [Spodoptera litura])
TRINITY_DN33092_c0_g1	0.0233409	-5.42099	3.65e-08	4.86e-06	yes	down	6.52	0.209412	4.53	14.18	7.37	9.43	1.51	2.1	0.1	0.06	0.07	0	0	0	0.69	0.76	0.09	0.04	0.15	0.02	0.02	0	0.35	0.68	0.53	XP_022815728.1(uncharacterized protein LOC111349005 isoform X3 [Spodoptera litura])
TRINITY_DN42926_c0_g1	0.159878	-2.64495	3.65e-08	4.86e-06	yes	down	2.1	0.481765	2.32	1.9	3.08	1.75	1.39	2.16	0.79	0.47	0.78	0.78	0.34	0.44	0.24	0.22	0.72	0.22	0.27	0.22	0.85	0.25	0.59	0.2	0.81	None
TRINITY_DN31190_c0_g1	0.265047	-1.91568	3.66e-08	4.87e-06	yes	down	30.6383	11.5341	29.55	30.91	45.01	27.61	28.51	22.24	12.81	11.56	11.75	13.6	14.09	13.28	14.26	5.96	12.92	11.68	12.31	12.99	12.61	14.85	5.39	6.56	9.46	None
TRINITY_DN46953_c0_g1	0.0577251	-4.11466	3.66e-08	4.87e-06	yes	down	1.55167	0.113529	2.27	1.69	0.77	1.92	1.4	1.26	0.11	0	0	0	0	0.18	0.37	0	0	0.11	0	0.17	0	0.2	0.39	0.3	0.1	None
TRINITY_DN164647_c0_g1	0.020712	-5.59339	3.67e-08	4.87e-06	yes	down	6.49333	0.174118	7.57	4.57	4.24	4.17	14.66	3.75	0	0	0.04	0.29	0.53	0.68	0	0.03	0	0	0	0.32	0.85	0.22	0	0	0	XP_022816425.1(proteoglycan 4-like [Spodoptera litura])
TRINITY_DN60959_c1_g2	34.3208	5.10101	3.72e-08	4.94e-06	yes	up	2.24667	28.3176	0.45	4.29	0.1	3.66	2.1	2.88	10.5	10.8	12.14	13.51	14.97	13.03	88.58	64.78	16.32	13.23	14.76	13.01	13.24	14.36	61.51	54.58	52.08	PCG66359.1(hypothetical protein B5V51_7779 [Heliothis virescens])
TRINITY_DN54127_c0_g1	0.191879	-2.38173	3.73e-08	4.95e-06	yes	down	3.995	1.04706	5.3	3.81	5.25	4.24	3.13	2.24	0.61	0.53	0.5	0.65	0.65	0.9	1.44	1.61	0.6	0.72	0.61	1.05	0.71	1	2.11	2.08	2.03	XP_022821819.1(voltage-dependent calcium channel subunit alpha-2/delta-3 isoform X3 [Spodoptera litura])
TRINITY_DN50759_c0_g1	0.0163892	-5.93112	3.74e-08	4.96e-06	yes	down	1.18167	0	0.71	1.25	0.38	2.03	1.34	1.38	0	0	0	0	0	0	0	0	0	0	0	0	0	0	0	0	0	None
TRINITY_DN56569_c0_g1	0.141302	-2.82315	3.76e-08	4.98e-06	yes	down	8.545	1.76412	7.99	8.17	11.9	11.26	5.75	6.2	1.65	0.85	1.42	2.57	2.04	2.57	0.37	0.65	2.36	1.31	2.22	3.08	3.25	4.07	0.47	0.31	0.8	XP_022826968.1(synaptic vesicle glycoprotein 2B-like [Spodoptera litura])
TRINITY_DN58786_c1_g1	8.56513	3.09847	3.77e-08	4.99e-06	yes	up	2.15667	23.5712	3.08	2.25	2.21	1.94	1.33	2.13	12.71	12.4	9.27	13.72	15.43	19.03	28.21	39.15	17.67	14.27	19.95	15.28	20.5	18.17	41.96	64.41	38.58	XP_021201530.1(beta-hexosaminidase subunit beta-like isoform X1 [Helicoverpa armigera])
TRINITY_DN51850_c1_g2	0.0518049	-4.27077	3.79e-08	5.02e-06	yes	down	0.203333	0.0123529	0.34	0.05	0.31	0.13	0.25	0.14	0	0	0	0	0	0.02	0	0.02	0.03	0	0.03	0	0	0	0	0.08	0.03	None
TRINITY_DN56906_c1_g1	6.27764	2.65022	3.8e-08	5.03e-06	yes	up	1.33667	11.7329	1.3	1.06	1.11	2.09	0.96	1.5	11.19	6.83	11.72	10.3	8.89	10.29	20.54	9.78	11.87	10.36	13.61	10.56	7.58	9.2	20.32	16.43	9.99	None
TRINITY_DN155135_c0_g1	0.0164347	-5.92711	3.89e-08	5.14e-06	yes	down	0.548333	0	0.56	0.29	0.44	0.26	0.55	1.19	0	0	0	0	0	0	0	0	0	0	0	0	0	0	0	0	0	None
TRINITY_DN46500_c0_g1	0.0156036	-6.00197	3.95e-08	5.22e-06	yes	down	1.92	0	0.72	1.13	1.48	2.01	2.42	3.76	0	0	0	0	0	0	0	0	0	0	0	0	0	0	0	0	0	None
TRINITY_DN31514_c0_g1	0.0271616	-5.20229	4.04e-08	5.33e-06	yes	down	25.6533	0.843529	13.81	89.18	8.77	30.73	5.72	5.71	0	0	0	0	0	0	0	10.89	0	0	0	0	0	0	0	3.45	0	None
TRINITY_DN22284_c0_g1	0.0364102	-4.77951	4.1e-08	5.41e-06	yes	down	0.338333	0.0111765	0.95	0.6	0.11	0.16	0.1	0.11	0	0	0	0	0	0	0	0.06	0	0	0	0	0	0	0	0.13	0	None
TRINITY_DN65555_c0_g1	0.113588	-3.13811	4.11e-08	5.41e-06	yes	down	3.76667	0.582353	4.39	4.17	2.8	3.57	4.02	3.65	0.11	0.2	0.16	0.33	0.27	0.57	1.31	0.81	0.48	0.12	0.26	0.69	0.73	0.47	1.23	1.32	0.84	XP_022828677.1(uncharacterized protein LOC111358027 [Spodoptera litura])
TRINITY_DN60392_c1_g3	4.72698	2.24092	4.11e-08	5.41e-06	yes	up	175.745	1141.15	120.58	140.27	67.14	211.04	338.27	177.17	1248.59	866.95	998.43	1286.65	1301.86	1552.31	674.28	714.53	1197.64	1359.91	1138.92	2047.67	1289.1	1358.27	688.88	1018.84	656.73	XP_022834060.1(ejaculatory bulb-specific protein 3-like isoform X1 [Spodoptera litura])
TRINITY_DN37927_c0_g1	0.212618	-2.23366	4.11e-08	5.42e-06	yes	down	18.3083	5.32176	18.82	14.11	16.83	19.99	23.19	16.91	2.8	2.23	2.8	5.18	4.56	4.15	11.07	4.32	4.71	3.86	4.36	6.06	3.93	6.83	9.45	7.53	6.63	XP_022825631.1(actin cytoskeleton-regulatory complex protein PAN1-like [Spodoptera litura])
TRINITY_DN53468_c0_g1	0.118727	-3.07428	4.14e-08	5.44e-06	yes	down	18.3217	2.89882	20.28	13.62	14.6	23.54	19.49	18.4	0.93	1.04	0.89	2.26	1.19	2.91	8.9	2.4	1.34	1.13	1.52	1.47	3.43	2.53	6.58	3.18	7.58	None
TRINITY_DN57878_c4_g1	0.188451	-2.40774	4.14e-08	5.44e-06	yes	down	56.19	15.1047	71.78	51.67	71.02	65.34	39.7	37.63	12.01	7.25	9.95	19.64	15.43	18.33	6.1	22.84	4.18	11.85	13.52	18.3	8.56	17.27	25.44	24.34	21.77	None
TRINITY_DN44051_c0_g1	0.0479303	-4.38292	4.15e-08	5.45e-06	yes	down	1.05833	0.0629412	0.21	1.17	1.07	0.67	2.35	0.88	0	0.18	0	0	0	0	0	0	0	0.1	0.28	0.08	0.26	0.17	0	0	0	None
TRINITY_DN54902_c0_g1	125.758	6.97451	4.18e-08	5.49e-06	yes	up	0	0.338235	0	0	0	0	0	0	0.31	0.35	0.14	0.7	0.47	0.14	0.03	0.63	0.52	0.26	0.13	0.27	0.64	0.41	0.37	0.05	0.33	None
TRINITY_DN55744_c1_g1	0.305288	-1.71176	4.19e-08	5.49e-06	yes	down	36.7067	16.6935	35.04	43.78	27.58	34.68	37.81	41.35	12.66	12.68	16.12	24	24.27	20.5	8.72	9.9	20.94	16.73	19.2	19.17	20.3	20.8	10.42	16.38	11	PCG74838.1(hypothetical protein B5V51_12672 [Heliothis virescens])
TRINITY_DN60942_c13_g7	0.0126105	-6.30923	4.23e-08	5.55e-06	yes	down	1.94667	0	3.13	0.52	1.19	3.44	0.21	3.19	0	0	0	0	0	0	0	0	0	0	0	0	0	0	0	0	0	None
TRINITY_DN62201_c0_g1	0.113585	-3.13816	4.26e-08	5.59e-06	yes	down	4.70833	0.662941	3.44	2.39	6.42	7.24	5.24	3.52	1.18	0.84	1.39	0.7	1.68	0.58	0.32	0.49	0.29	0.41	0.41	0.85	0.72	0.24	0.14	0.13	0.9	XP_022837957.1(WD repeat-containing protein 75-like [Spodoptera litura])
TRINITY_DN63159_c0_g1	3.10862	1.63627	4.31e-08	5.64e-06	yes	up	4.93	21.6982	7.43	3.91	4.41	4.6	4.63	4.6	19.41	17.98	20.85	25.32	22.56	22.58	11.94	16.56	24.34	21.14	28.82	32.54	23.65	28.87	16.84	18.8	16.67	XP_022821064.1(NHL repeat-containing protein 2 [Spodoptera litura])
TRINITY_DN43090_c0_g1	0.181754	-2.45994	4.32e-08	5.66e-06	yes	down	9.49667	2.46176	9.69	8.22	8.03	8.78	11.4	10.86	2.1	1.42	2.36	3.85	3.64	4.02	0.42	1.59	2.75	1.91	3.26	3.53	4.12	3.41	0.95	1.22	1.3	XP_022831747.1(calcium/calmodulin-dependent 3',5'-cyclic nucleotide phosphodiesterase 1-like [Spodoptera litura])
TRINITY_DN57200_c3_g1	0.181464	-2.46224	4.35e-08	5.69e-06	yes	down	4.82833	1.29235	4.16	3.39	4.21	4.96	6.58	5.67	1.64	1.55	1.35	0.7	0.55	0.82	0.14	1.65	1.86	1.96	1.69	0.71	0.48	1.44	1.48	1.85	2.1	None
TRINITY_DN63156_c1_g1	0.184297	-2.4399	4.37e-08	5.72e-06	yes	down	18.6	4.83294	18.01	8.64	9.12	24.7	28.69	22.44	4.55	4.77	3.23	1.71	1.89	7.34	4.27	4.45	4.47	3.5	4.81	5.68	5.04	6.73	7.85	5.18	6.69	XP_022819092.1(uncharacterized protein LOC111351402 [Spodoptera litura])
TRINITY_DN56043_c2_g1	636.063	9.31303	4.41e-08	5.76e-06	yes	up	0	2.72412	0	0	0	0	0	0	0.36	1.35	0.72	6.41	5.98	5.13	1	0.43	0.54	0.81	1.33	5.62	6.86	6.27	0.51	1.97	1.02	XP_022828892.1(uncharacterized protein LOC111358185 [Spodoptera litura])
TRINITY_DN43568_c2_g1	0.028613	-5.12719	4.44e-08	5.8e-06	yes	down	1.48333	0.0276471	1.61	0	0	1.87	1.87	3.55	0	0	0	0.47	0	0	0	0	0	0	0	0	0	0	0	0	0	None
TRINITY_DN60749_c1_g1	0.0151756	-6.0421	4.44e-08	5.8e-06	yes	down	3.245	0	0.92	4.23	6.84	3.67	2.83	0.98	0	0	0	0	0	0	0	0	0	0	0	0	0	0	0	0	0	None
TRINITY_DN53247_c0_g1	0.0369683	-4.75757	4.47e-08	5.83e-06	yes	down	0.463333	0.0141176	0.09	0.34	0.09	0.79	0.59	0.88	0	0	0	0	0	0	0	0	0	0.24	0	0	0	0	0	0	0	None
TRINITY_DN41330_c0_g1	0.0393077	-4.66904	4.57e-08	5.96e-06	yes	down	10.5283	0.434118	19.92	29.08	0.38	6.39	0.33	7.07	0	0	0	0	0	0	7.38	0	0	0	0	0	0	0	0	0	0	None
TRINITY_DN60165_c1_g1	4.50652	2.17202	4.6e-08	6e-06	yes	up	34.8133	227.776	31.25	39.67	12.73	54.14	39.3	31.79	154.8	154.29	153.23	190.51	194.61	191.98	408.44	296.84	187.74	188.23	187.45	191.63	207.86	198.09	346.94	333.88	285.68	XP_022830938.1(cathepsin B-like [Spodoptera litura])
TRINITY_DN60324_c7_g1	0.0560457	-4.15725	4.61e-08	6e-06	yes	down	6.33167	0.470588	5.05	5.84	6.53	5.41	7.63	7.53	0.13	0.02	0.14	0.1	0.13	0.13	1.57	1.06	0.15	0.32	0.21	0.19	0.1	0.16	0.3	2.21	1.08	XP_022834886.1(lysozyme-like [Spodoptera litura])
TRINITY_DN55350_c0_g1	0.400722	-1.31933	4.64e-08	6.04e-06	yes	down	11.265	6.65176	12.39	10.31	11.21	9.87	13.16	10.65	8.7	6.64	7.42	4.95	5.28	6.46	3.45	7.72	7.49	7.81	6.66	5.94	4.77	6.35	6.94	7.26	9.24	XP_022830144.1(LOW QUALITY PROTEIN: uncharacterized protein LOC111358972 [Spodoptera litura])
TRINITY_DN55717_c9_g4	0.0438209	-4.51224	4.69e-08	6.1e-06	yes	down	1.08	0.0629412	2.99	0.34	0.53	0.99	0.56	1.07	0.11	0	0	0.2	0	0.09	0.05	0	0.16	0	0	0	0	0	0.2	0	0.26	None
TRINITY_DN58064_c4_g6	0.0171179	-5.86835	4.74e-08	6.15e-06	yes	down	110.94	1.55882	5.68	0	632.6	11.69	9.55	6.12	0	0	0	12.94	0	0	0	13.56	0	0	0	0	0	0	0	0	0	None
TRINITY_DN39579_c1_g1	0.0156057	-6.00179	4.74e-08	6.16e-06	yes	down	30.4717	0	26.85	41.69	58.49	9.04	37.24	9.52	0	0	0	0	0	0	0	0	0	0	0	0	0	0	0	0	0	XP_022826440.1(chymotrypsin-1-like [Spodoptera litura])
TRINITY_DN57124_c1_g5	0.056887	-4.13576	4.75e-08	6.16e-06	yes	down	2.63333	0.274706	1.27	0.74	8.38	3.87	0.29	1.25	0.38	0.18	0.54	0.15	0	0.06	0.33	1.2	0.15	0.16	0.11	0.04	0.03	0.08	0.26	0.66	0.34	XP_022827267.1(cytochrome P450 4V2-like [Spodoptera litura])
TRINITY_DN52143_c0_g4	0.0453744	-4.46198	4.77e-08	6.19e-06	yes	down	54.2917	3.67588	49.68	68.35	43.48	71.9	47.28	45.06	4.98	4.32	5.24	4.82	5.31	5.01	0.07	0.14	5.85	6.97	5.57	6.74	4.11	3.26	0	0.04	0.06	XP_022835115.1(B1 protein-like [Spodoptera litura])
TRINITY_DN63192_c0_g3	0.0851844	-3.55327	4.79e-08	6.21e-06	yes	down	13.4183	1.73647	15.64	11.23	10.78	13.73	15.56	13.57	0.47	1.31	0.48	1.92	0.8	0.61	2.33	6.72	0.48	0.54	0.77	0.6	0.45	1.2	4.24	3.85	2.75	AIB06821.1(ABCC2 [Spodoptera exigua])
TRINITY_DN61282_c1_g3	0.0442314	-4.49879	4.8e-08	6.22e-06	yes	down	2.10667	0.0988235	1.66	2.54	2.5	1.21	2.51	2.22	0	0	0	0.19	0	0.72	0.58	0.19	0	0	0	0	0	0	0	0	0	None
TRINITY_DN54542_c1_g1	6.09826	2.6084	4.81e-08	6.22e-06	yes	up	2.41333	18.7571	2.59	3.66	1.2	3.16	2.12	1.75	9.13	9.88	10.84	20.96	24.05	24.43	14.22	16.23	16.91	10.57	11.78	22.24	21.11	21.33	31.02	34.98	19.19	XP_022814805.1(integrin alpha-PS3-like [Spodoptera litura])
TRINITY_DN61272_c6_g4	0.301772	-1.72847	4.82e-08	6.23e-06	yes	down	18.0717	8.18294	18.81	17.35	13.67	13.18	20.46	24.96	7.2	7.13	7.9	10.13	8.41	8.61	4.82	4.13	13.26	10.73	11.32	8.22	8.26	8.1	5.16	8.21	7.52	XP_022815782.1(uncharacterized protein LOC111349050 [Spodoptera litura])
TRINITY_DN61999_c5_g3	0.294862	-1.76189	4.84e-08	6.26e-06	yes	down	190.768	85.9571	207.98	216.71	192.86	187.38	181.94	157.74	85.36	80.94	82.57	70.56	80.67	88.65	30.59	34.48	129.78	154.15	194.57	98.17	101.83	114.12	42.22	33.43	39.18	XP_022826896.1(probable methylmalonate-semialdehyde dehydrogenase [acylating], mitochondrial [Spodoptera litura])
TRINITY_DN60215_c4_g2	0.0173871	-5.84584	4.85e-08	6.27e-06	yes	down	0.893333	0	1.42	0.67	0.31	0.74	0.95	1.27	0	0	0	0	0	0	0	0	0	0	0	0	0	0	0	0	0	None
TRINITY_DN58824_c4_g2	11.5758	3.53304	4.9e-08	6.32e-06	yes	up	1.06	20.7276	0.93	0.97	1.12	1.27	0.97	1.1	31.58	7.13	18.86	27.71	31.72	31.26	7.55	5.81	17.78	14.41	13.64	34.15	39.85	42.24	12.1	10	6.58	PCG64508.1(hypothetical protein B5V51_10548 [Heliothis virescens])
TRINITY_DN57302_c0_g1	0.207071	-2.27181	4.92e-08	6.35e-06	yes	down	10.36	3.07	9.71	8.86	10.32	10.22	13.88	9.17	1.37	1.56	1.88	5.04	6.65	5.44	1.3	2.45	2.52	1.46	1.94	4.58	4.85	3.63	2.84	2.21	2.47	XP_022832031.1(uncharacterized protein LOC111360359 isoform X2 [Spodoptera litura])
TRINITY_DN48045_c0_g2	4.40557	2.13933	4.99e-08	6.44e-06	yes	up	2.31833	14.4347	2.46	2.41	1.77	2.21	2.9	2.16	9.97	8.9	9.21	14.49	15.49	17.9	12.45	18.36	10.5	10.43	13.46	16.68	12.77	16.11	19.89	20.87	17.91	XP_022815225.1(uncharacterized protein LOC111348688 [Spodoptera litura])
TRINITY_DN52403_c0_g1	0.0782195	-3.67633	5.06e-08	6.52e-06	yes	down	2.93167	0.33	3.34	2.3	5.83	0.42	2.95	2.75	0.57	0.15	0.3	0.38	0.1	0.31	0	0.92	0.48	0.04	0.19	0.37	0.32	0.5	0.07	0.04	0.87	PCG67458.1(hypothetical protein B5V51_6382 [Heliothis virescens])
TRINITY_DN46693_c0_g1	0.293176	-1.77016	5.07e-08	6.53e-06	yes	down	8.445	3.64824	7.84	8.04	10.45	7.93	8.78	7.63	5.34	4.89	6	3.49	3.77	3.24	2.25	3.06	4.96	4.04	4.63	2.67	3.33	2.45	2.23	2.12	3.55	XP_022825328.1(uncharacterized protein LOC111355575 [Spodoptera litura])
TRINITY_DN63255_c3_g4	8.96401	3.16415	5.11e-08	6.58e-06	yes	up	11.8317	145.822	13.43	12.01	7.83	13.5	14.4	9.82	131.54	121.05	125.4	68.16	69.34	65.52	364.74	218.82	112.2	112.51	108.26	63.77	55.4	63.1	258.19	262.69	278.29	None
TRINITY_DN59033_c2_g1	0.173201	-2.52948	5.13e-08	6.61e-06	yes	down	9.41833	2.27176	10.66	10.29	7.47	8.14	11.88	8.07	0.88	1.06	1.05	1.37	1.58	2.02	2.9	5.89	1.89	1.08	1.07	2	1.92	2.21	4.76	3.08	3.86	XP_022837611.1(G protein-activated inward rectifier potassium channel 3-like [Spodoptera litura])
TRINITY_DN55632_c0_g1	0.0287703	-5.11928	5.14e-08	6.61e-06	yes	down	48.995	1.89941	46.72	50.31	32.53	56.86	57.54	50.01	0.36	0.04	0.17	0.16	0.43	0.37	4.31	4.8	0.25	0.45	0.18	0.21	0.13	0.29	5.38	5.85	8.91	XP_022827657.1(uncharacterized protein LOC111357271 isoform X1 [Spodoptera litura])
TRINITY_DN55896_c0_g4	187.412	7.55007	5.15e-08	6.62e-06	yes	up	0	0.844118	0	0	0	0	0	0	0.4	0.04	0.18	0.38	0.44	0.56	0.34	1.41	0.51	0.55	0.53	1.52	1.38	1.66	1.29	1.29	1.87	None
TRINITY_DN41667_c0_g1	33.016	5.04509	5.17e-08	6.63e-06	yes	up	0.00666667	0.372941	0	0	0.02	0	0.02	0	0.21	0.39	0.27	0.33	0.41	0.61	0.04	0.3	0.59	0.2	0.27	0.72	0.6	0.5	0.25	0.23	0.42	None
TRINITY_DN34294_c0_g1	0.0313495	-4.99541	5.21e-08	6.68e-06	yes	down	1.02333	0.00647059	0.45	0	0.84	1.15	0.39	3.31	0	0	0	0	0	0.11	0	0	0	0	0	0	0	0	0	0	0	None
TRINITY_DN51859_c0_g1	0.131836	-2.92319	5.24e-08	6.73e-06	yes	down	21.1867	3.66824	14.55	17.94	19.66	21.66	20.22	33.09	1.12	1.67	1.21	2.1	1.51	1.87	7.14	5.94	4.54	3.5	2.87	3.21	3.1	4.43	4.16	6.73	7.26	XP_022837060.1(protein lethal(2)essential for life-like [Spodoptera litura])
TRINITY_DN59325_c1_g1	0.3258	-1.61794	5.25e-08	6.72e-06	yes	down	180.46	92.7282	156.78	138.66	187.13	197.76	191.21	211.22	120.97	113.27	114.11	101.14	94.64	80.46	18.68	61.14	139.9	113.98	114.52	104.31	102.3	133.19	35.27	71.48	57.02	XP_022829186.1(lipopolysaccharide-induced tumor necrosis factor-alpha factor homolog [Spodoptera litura])
TRINITY_DN63606_c4_g1	7.65177	2.93579	5.28e-08	6.77e-06	yes	up	3.05667	33.3812	6.22	1.67	2.94	1.97	3.46	2.08	19.33	16.77	21.41	34.7	26.75	42.04	6.99	66.7	25.74	19.37	26.44	36.07	26.91	44.36	58.49	62.95	32.46	XP_022814263.1(protein yippee-like CG15309 isoform X2 [Spodoptera litura])
TRINITY_DN55931_c1_g4	0.00825855	-6.9199	5.29e-08	6.78e-06	yes	down	10.0317	0	23.43	6.74	13.93	3.82	0	12.27	0	0	0	0	0	0	0	0	0	0	0	0	0	0	0	0	0	None
TRINITY_DN6132_c1_g1	0.0317568	-4.97679	5.39e-08	6.9e-06	yes	down	0.478333	0.0135294	0.52	0.42	0	0.99	0.87	0.07	0	0.23	0	0	0	0	0	0	0	0	0	0	0	0	0	0	0	None
TRINITY_DN61074_c4_g5	0.0154311	-6.01802	5.41e-08	6.92e-06	yes	down	0.335	0	0.7	0.28	0.1	0.1	0.51	0.32	0	0	0	0	0	0	0	0	0	0	0	0	0	0	0	0	0	None
TRINITY_DN63670_c36_g1	0.0368752	-4.76121	5.44e-08	6.95e-06	yes	down	0.248333	0.00588235	0.31	0.26	0.24	0	0.27	0.41	0	0	0	0	0	0.1	0	0	0	0	0	0	0	0	0	0	0	None
TRINITY_DN58097_c0_g1	3.08662	1.62603	5.45e-08	6.96e-06	yes	up	3.955	48.85	4.92	2.72	3.28	4.62	4.39	3.8	35.48	25.7	33.18	50.12	47.53	51.28	30.6	57.81	50.87	51.49	57.36	62.56	68.51	63.49	51.89	44.93	47.65	XP_022830679.1(protein winged eye isoform X2 [Spodoptera litura])
TRINITY_DN52389_c0_g1	0.0912272	-3.45439	5.46e-08	6.96e-06	yes	down	0.361667	0.0447059	0.18	0.23	0.33	0.64	0.42	0.37	0.03	0.05	0.05	0.07	0.07	0.01	0	0.05	0.06	0.15	0.02	0.07	0.05	0.02	0.06	0	0	None
TRINITY_DN62031_c1_g1	0.164273	-2.60583	5.46e-08	6.97e-06	yes	down	0.983333	0.238235	1.33	1.05	0.52	0.51	0.98	1.51	0.52	0.1	0.17	0.26	0.31	0.31	0.2	0.1	0.17	0.13	0.27	0.22	0.14	0.12	0.23	0.42	0.38	XP_022824875.1(uncharacterized protein LOC111355320 [Spodoptera litura])
TRINITY_DN63266_c0_g2	6.73907	2.75255	5.51e-08	7.02e-06	yes	up	26.655	256.605	26.61	23.3	12.43	36.99	26.47	34.13	215.14	142.04	190.47	460.1	402.19	405.66	51.61	99.72	279.01	233.22	295.01	370.01	341.22	390.98	188.28	144.72	152.9	XP_022820694.1(clavesin-1 [Spodoptera litura])
TRINITY_DN85872_c0_g1	9.61364	3.26508	5.52e-08	7.04e-06	yes	up	0.695	9.34471	0.54	0.93	0.72	0.46	0.62	0.9	6.49	5.25	6.76	8.49	9.86	8.47	15.59	13.53	5.36	5.06	5.33	7.32	6.64	6.93	15.87	13.68	18.23	None
TRINITY_DN50468_c0_g2	7.49332	2.9056	5.57e-08	7.1e-06	yes	up	1.11	11.9947	1.28	0.71	0.91	1.63	1.42	0.71	9.44	6.67	9.49	8.53	8.73	14.41	0.83	13.15	12.85	11.26	14.56	14.55	13.01	17.83	17.11	17.01	14.48	XP_022832542.1(solute carrier family 35 member F6 [Spodoptera litura])
TRINITY_DN59320_c0_g2	4.39238	2.135	5.58e-08	7.11e-06	yes	up	3.29333	21.2312	3.25	3.15	3.02	3.2	3.08	4.06	35.18	38.74	39.54	15.68	16.92	13.58	23.74	11.58	17.98	26.69	23.73	14.54	12.81	14.51	17.71	19.16	18.84	XP_022816283.1(ATP-binding cassette sub-family G member 5 [Spodoptera litura])
TRINITY_DN47516_c0_g2	0.0428777	-4.54363	5.62e-08	7.14e-06	yes	down	20.1783	0.372941	18.25	8.44	19.75	36.39	26.7	11.54	0	0	0	0	0	0	4.12	0	0	0	0	0	0	2.22	0	0	0	XP_022821670.1(trypsin, alkaline C-like [Spodoptera litura])
TRINITY_DN58377_c2_g1	0.268087	-1.89923	5.65e-08	7.18e-06	yes	down	6.56	2.66941	7.44	5.23	5.79	5.89	9.1	5.91	4.3	2.9	4.4	1.63	1.37	1.64	1.06	3.13	3.66	3.27	4.37	1.4	1.28	2.26	2.85	3	2.86	XP_022824592.1(arrestin domain-containing protein 17-like [Spodoptera litura])
TRINITY_DN50453_c0_g3	3.08317	1.62441	5.65e-08	7.18e-06	yes	up	17.705	79.4041	17.44	19.54	10.03	19.12	20.61	19.49	80.86	83.27	96.59	86.29	79.18	76.2	31	97.66	79.05	86.86	82.87	65.81	69.58	74.24	79.56	101.08	79.77	XP_022815396.1(uncharacterized protein LOC111348788 [Spodoptera litura])
TRINITY_DN46946_c0_g1	0.0434209	-4.52547	5.66e-08	7.19e-06	yes	down	7.375	0.432353	7.35	5.42	0.29	6.93	12.58	11.68	0.21	1.01	0.2	1.84	0	0	0	0.61	0.2	0.22	0.21	1.51	0.78	0	0	0	0.56	XP_022818242.1(myrosinase 1-like isoform X1 [Spodoptera litura])
TRINITY_DN55630_c2_g1	727.176	9.50616	5.74e-08	7.29e-06	yes	up	0.0933333	101.554	0.06	0.27	0.08	0.08	0.07	0	53.83	81.08	73.45	256.07	207.91	138.71	2.5	0.83	126.41	92.3	96.71	189.91	209.99	193.18	1.4	0.99	1.15	XP_022829464.1(lipopolysaccharide-induced tumor necrosis factor-alpha factor homolog [Spodoptera litura])
TRINITY_DN40476_c0_g4	0.0163362	-5.93578	5.75e-08	7.29e-06	yes	down	26.4567	0.575294	21.57	31.98	47.06	15.85	21.5	20.78	0.06	0	0	1.46	2.52	1.28	0	0	0.05	0	0	1.36	1.25	1.7	0.05	0	0.05	XP_022816848.1(mucin-5AC-like [Spodoptera litura])
TRINITY_DN62486_c0_g1	0.261199	-1.93678	5.77e-08	7.31e-06	yes	down	475.655	180.004	454.55	495.38	522.94	410.39	399.93	570.74	141.72	119.43	147.52	317.11	330.51	316.04	75.29	77.22	191.89	152.71	179.83	279.32	206.57	315.49	73.41	75.95	60.06	XP_022832505.1(paramyosin, long form-like [Spodoptera litura])
TRINITY_DN54893_c0_g1	0.0946292	-3.40157	5.82e-08	7.37e-06	yes	down	3.58	0.444706	1.58	2.06	6.85	6.17	1.48	3.34	0.16	0.48	0.19	0.53	1.49	0.32	1.16	0.16	0.38	0.51	0.15	0.84	0.19	0.41	0.36	0.09	0.14	XP_022817470.1(uncharacterized protein LOC111350240 [Spodoptera litura])
TRINITY_DN57538_c3_g1	0.148937	-2.74723	5.91e-08	7.48e-06	yes	down	15.595	10.5412	12.55	13.85	16.62	18.62	18.84	13.09	11.26	10.34	9.83	7.58	6.71	6.03	10.32	10.72	3.34	6.85	5.01	9.48	1.41	11.71	20.09	23.67	24.85	XP_022831919.1(luciferin 4-monooxygenase-like [Spodoptera litura])
TRINITY_DN60737_c2_g2	0.0431366	-4.53494	5.98e-08	7.56e-06	yes	down	67.0083	4.11235	82.07	98.11	22.9	55.68	54.91	88.38	1.71	3.43	1.76	7.72	10.19	8.15	0	0	3.58	1.73	4.01	8.57	10.12	8.16	0.39	0.39	0	XP_022827201.1(lactase-phlorizin hydrolase-like [Spodoptera litura])
TRINITY_DN56629_c2_g1	15.7296	3.97541	6.01e-08	7.6e-06	yes	up	0.265	6.02706	0.29	0.22	0.13	0.23	0.47	0.25	5.86	5.35	5.17	8.4	8.92	10.67	0.38	1.36	6.92	7.51	6.83	9.92	9.58	10.78	1.65	1.89	1.27	XP_022837331.1(uncharacterized protein LOC111364632 isoform X1 [Spodoptera litura])
TRINITY_DN57072_c0_g2	5.60186	2.48591	6.07e-08	7.66e-06	yes	up	2.95333	22.1135	2.09	1.71	3.4	3.52	3.95	3.05	17.35	11.4	15.03	17.27	17.41	18.67	10.32	32.77	20.03	15.11	15.52	25.61	18.52	27.12	37.02	42.64	34.14	XP_022820897.1(sorting nexin-20 isoform X1 [Spodoptera litura])
TRINITY_DN48530_c0_g1	23.8707	4.57717	6.1e-08	7.71e-06	yes	up	0.00833333	0.273529	0	0.01	0.02	0	0	0.02	0.27	0.11	0.17	0.29	0.34	0.47	0.17	0.3	0.23	0.27	0.1	0.4	0.23	0.4	0.28	0.35	0.27	XP_022825697.1(neurotrimin-like isoform X1 [Spodoptera litura])
TRINITY_DN58924_c2_g1	0.361427	-1.46822	6.13e-08	7.73e-06	yes	down	84.4633	29.0471	68.6	83.53	56.57	66.06	131.22	100.8	33.55	32.08	32.65	31.42	37.09	29.64	18.75	23.47	26.58	27.58	27.58	25.72	27.91	27.09	32.32	19.91	40.46	XP_022827342.1(ubiquitin thioesterase trabid-like [Spodoptera litura])
TRINITY_DN151076_c0_g1	0.0142124	-6.13671	6.13e-08	7.74e-06	yes	down	0.565	0	0.28	0.34	0.16	0.53	0.28	1.8	0	0	0	0	0	0	0	0	0	0	0	0	0	0	0	0	0	None
TRINITY_DN56607_c7_g1	10.608	3.40707	6.15e-08	7.75e-06	yes	up	1.11167	17.6424	0.49	2.18	0.9	0.79	0.99	1.32	12.87	19.65	16.38	13.01	16.72	9.28	31	23.26	18.67	11.45	13.56	13.08	12.64	12.24	16.89	24.69	34.53	XP_022830952.1(sulfotransferase 1 family member D1-like [Spodoptera litura])
TRINITY_DN47548_c0_g2	0.175761	-2.50831	6.15e-08	7.75e-06	yes	down	61.195	14.6129	58.78	59.61	75.74	64.12	52.87	56.05	7.03	6.33	7.62	13.28	11.16	11.65	31.25	26.98	9.96	8.56	4.9	15	13.52	17.37	11.44	30.37	22	PCG66042.1(hypothetical protein B5V51_8293 [Heliothis virescens])
TRINITY_DN56609_c3_g2	11.4615	3.51873	6.17e-08	7.77e-06	yes	up	25.3083	415.225	19.47	22.94	22.8	24.87	39.05	22.72	394.3	412.7	469.19	713.47	739.61	675.68	77.45	79.7	503.52	398.27	420.41	671.04	654.47	570.58	89.35	115.08	74	XP_022837887.1(cuticle protein 10.9-like [Spodoptera litura])
TRINITY_DN39628_c0_g1	0.0685618	-3.86645	6.19e-08	7.79e-06	yes	down	1.31333	0.122941	1.53	2.83	0.5	0.55	1.31	1.16	0.17	0.04	0	0.19	0.41	0.07	0.26	0.1	0.16	0	0.08	0.03	0.31	0.15	0.08	0	0.04	None
TRINITY_DN53878_c1_g3	16.4533	4.04031	6.29e-08	7.91e-06	yes	up	0.0666667	1.45118	0.05	0.06	0.14	0.02	0.05	0.08	1.33	1.33	1.36	1.35	1.3	2.6	0.05	0.96	1.82	0.83	1.82	2.5	2.28	2.31	1.17	0.52	1.14	None
TRINITY_DN145118_c0_g1	0.019067	-5.71278	6.3e-08	7.92e-06	yes	down	3.94333	0	2.91	6.33	1.54	2.4	8.43	2.05	0	0	0	0	0	0	0	0	0	0	0	0	0	0	0	0	0	None
TRINITY_DN52188_c0_g1	6.75123	2.75515	6.36e-08	7.99e-06	yes	up	1.00833	10.4612	1.04	0.6	1.24	1.28	1.44	0.45	8.05	8.53	8.21	10.68	9.62	13.22	1.39	10.52	13.54	10.41	11.44	13.03	11.62	16.09	12.32	12.47	6.7	PCG80042.1(hypothetical protein B5V51_12028 [Heliothis virescens])
TRINITY_DN54876_c0_g1	0.0164262	-5.92786	6.38e-08	8e-06	yes	down	0.425	0	0.44	0.84	0.14	0.48	0.5	0.15	0	0	0	0	0	0	0	0	0	0	0	0	0	0	0	0	0	None
TRINITY_DN25104_c0_g1	0.0141557	-6.14247	6.42e-08	8.06e-06	yes	down	6.90333	0	2.89	11.98	7.1	0.93	14.53	3.99	0	0	0	0	0	0	0	0	0	0	0	0	0	0	0	0	0	XP_022828344.1(juvenile hormone esterase-like [Spodoptera litura])
TRINITY_DN58965_c2_g5	4.26259	2.09173	6.48e-08	8.12e-06	yes	up	9.79	62.8559	11.14	10.94	8.42	7.91	11.96	8.37	97.04	97.6	106.89	31.89	35.95	37.12	32.06	43.92	85.03	94.32	99.03	37.94	39.33	42.29	69	56.64	62.5	None
TRINITY_DN63490_c1_g1	0.468365	-1.09429	6.51e-08	8.15e-06	yes	down	137.212	94.9106	154.65	111.07	136.76	147.97	170.92	101.9	130.88	122.24	132.1	81.33	76.21	85.74	39.39	70.56	128.84	124.78	122.14	85.26	80.32	95.3	84.21	75.56	78.62	XP_022819366.1(vigilin [Spodoptera litura])
TRINITY_DN34740_c0_g1	0.0397994	-4.65111	6.53e-08	8.17e-06	yes	down	0.2	0.00647059	0.35	0.11	0.26	0.38	0.03	0.07	0	0	0	0	0.07	0	0	0	0	0	0	0	0.04	0	0	0	0	None
TRINITY_DN2107_c0_g1	0.0154823	-6.01324	6.55e-08	8.19e-06	yes	down	11.6833	0	10.43	19.77	22.02	11.81	4.27	1.8	0	0	0	0	0	0	0	0	0	0	0	0	0	0	0	0	0	None
TRINITY_DN48925_c0_g1	24.2355	4.59905	6.55e-08	8.19e-06	yes	up	0.486667	17.3729	0.69	0	0.58	0.49	0.72	0.44	23.15	21.75	22.22	2.62	8.92	6.36	7.35	34.2	19.5	14.89	15.33	6.4	6.27	4.57	30.32	24.62	46.87	None
TRINITY_DN44634_c0_g1	5.56216	2.47564	6.58e-08	8.23e-06	yes	up	1.14167	9.09471	0.67	0.7	0.47	2	1.03	1.98	10.13	9.69	11.07	6.64	9.62	9.91	7.4	5.65	14.02	9.05	12.7	8.66	7.29	8.71	9.82	7.9	6.35	None
TRINITY_DN7103_c0_g1	8.9361	3.15965	6.6e-08	8.25e-06	yes	up	0.18	2.29941	0.24	0.13	0.16	0.21	0.24	0.1	1.49	1.43	1.68	3.66	3.63	2.97	0.61	1.45	2.43	2.26	2.02	3.61	4.27	3.61	1.04	1.28	1.65	XP_022830740.1(uncharacterized protein LOC111359419 [Spodoptera litura])
TRINITY_DN61993_c1_g4	0.0182651	-5.77476	6.63e-08	8.27e-06	yes	down	0.321667	0	0.42	0.19	0.34	0.11	0.57	0.3	0	0	0	0	0	0	0	0	0	0	0	0	0	0	0	0	0	XP_022836642.1(cytochrome P450 4c21-like, partial [Spodoptera litura])
TRINITY_DN53902_c0_g1	0.0432693	-4.53051	6.76e-08	8.44e-06	yes	down	0.853333	0.0176471	0.24	1.42	1.56	0.25	1.12	0.53	0	0	0.3	0	0	0	0	0	0	0	0	0	0	0	0	0	0	None
TRINITY_DN105047_c0_g1	0.139791	-2.83866	6.78e-08	8.46e-06	yes	down	3.48667	0.678235	3.33	1.06	2.62	3.15	4.83	5.93	0.72	0.44	0.11	0.41	0.71	1.07	0.46	0.75	0.82	0.53	0.17	0.74	0.16	1.16	1.2	0.91	1.17	XP_022821413.1(ras-related protein Rab-44 isoform X1 [Spodoptera litura])
TRINITY_DN57694_c0_g1	0.0212517	-5.55628	6.93e-08	8.63e-06	yes	down	9.09667	0.21	12	18.9	7.49	4.59	5.19	6.41	0	0	0.08	0	0.02	0	0.96	0.28	0.03	0.12	0.13	0.03	0	0.02	0.8	0.48	0.62	XP_022822326.1(pancreatic triacylglycerol lipase-like [Spodoptera litura])
TRINITY_DN12856_c0_g2	0.108167	-3.20867	6.94e-08	8.65e-06	yes	down	1.805	0.267647	1.65	1.54	1.45	1.78	1.62	2.79	0.18	0	0.33	0.51	0.71	0.37	0.05	0.42	0.22	0.12	0.06	0.27	0.21	0.47	0.21	0.37	0.05	None
TRINITY_DN51301_c0_g1	0.0341385	-4.87246	7.01e-08	8.73e-06	yes	down	2.14	0.0952941	1.83	1.93	2.39	2.24	3.05	1.4	0.15	0	0.05	0	0	0	0.44	0.23	0	0.06	0	0.04	0	0	0.33	0.16	0.16	XP_022834411.1(uncharacterized protein LOC111362109 [Spodoptera litura])
TRINITY_DN43587_c1_g1	0.0667087	-3.90598	7.12e-08	8.86e-06	yes	down	2.795	0.237059	3.47	1.52	2.09	1.34	5.02	3.33	0.29	0.28	0.53	0.5	0	0	0.25	0	0	0	0.29	0	0.54	0	0.53	0.82	0	PCG77515.1(hypothetical protein B5V51_7148, partial [Heliothis virescens])
[truncated: 9,906 more rows]

## Sheet: DEGs at pupal stage
Gene_id	FC(LMF/P)	Log2FC(LMF/P)	Pvalue	Padjust	Significant	Regulate	P	LMF	2021-09-08	2021-09-09	V1V2SEP10	V1V2SEP11	V1V2SEP12	SEAF19	SEAF20	SEAF21	SEAM13	SEAM14	SEAM15	SEL1	SEL2	SEL3	V1V2SEAF22	V1V2SEAF23	V1V2SEAF24	V1V2SEAM16	V1V2SEAM17	V1V2SEAM18	V1V2SEL4	V1V2SEL5	V1V2SEL6	NR description
[truncated: 9,441 more rows]

[truncated: 2 more sheets: DEGs in male adults, DEGs in female adults]
