# Supplementary material for: Sex- and stage-dependent expression patterns of odorant-binding and chemosensory protein genes in Spodoptera exempta
Source: PeerJ. 2021 Sep 13;9:e12132. doi: 10.7717/peerj.12132 (PMC8445084; doi:10.7717/peerj.12132)
Supplement: Supplemental Information 19 [file peerj-09-12132-s019.xls]

## Sheet: Sheet1
		L			P			F			M
Gene name	Ct 1	Ct 2	Ct 3	Ct 1	Ct 2	Ct 3	Ct 1	Ct 2	Ct 3	Ct 1	Ct 2	Ct 3
actin	17.7531	17.9377	17.8401	17.8333	17.9508	17.9366	18.9463	18.7479	18.7712	17.9447	17.9339	17.9068
GAPDH	19.9395	19.9368	19.9868	18.9138	18.966	18.9551	18.9405	18.9757	18.9531	17.857	17.8548	17.9268
SexeOBP9-qF	35.9272	36.6282	36.9829	35.9787	36.7706	36.8704	35.9765	36.7027	36.8454	34.93	35.6991	35.9812
SexeOBP13-qF	33.3302	33.5565	33.9564	36.2973	36.4115	37.0505	36.9123	Undetermined	Undetermined	36.4307	37.2337	36.9184
SexeOBP15-qF	32.8339	33.4969	33.9718	35.8467	36.0438	37.0718	34.7201	35.332	35.9819	32.8683	33.313	33.9775
SexeOBP16-qF	35.2153	35.5835	35.9865	36.268	36.5485	37.0373	36.7172	36.9646	37.7983	36.1695	36.65	36.9567
SexeOBP18-qF	36.2706	36.5352	37.032	30.8042	30.9691	31.6064	36.3905	36.5355	36.9884	33.9429	34.4109	34.9758
SexeOBP26-qF	33.7155	33.8783	33.9591	34.5709	34.9601	34.9477	28.5733	28.7055	28.9564	26.9599	27.1758	27.453
SexeOBP29-qF	34.9668	35.2531	35.4712	34.9551	35.2927	35.4684	35.4117	35.7527	35.9638	32.7961	32.9583	33.2887
SexeOBP30-qF	32.9497	32.9281	32.9317	28.9566	28.6581	28.3014	37.0271	36.8933	36.1441	28.5101	27.9564	27.7452
SexeOBP31-qF	27.7795	27.9242	28.0779	28.4395	28.8397	28.9302	26.2927	26.4802	26.5733	28.7481	28.9425	29.1726
SexeOBP35-qF	25.274	25.335	25.4345	26.0063	26.2135	26.1872	21.7197	21.6976	21.8576	26.8818	26.8985	26.9148
SexeOBP37-qF	32.9329	32.8844	32.9366	32.7924	32.8174	32.9147	32.948	32.9409	32.9219	32.9505	32.8582	32.8921
SexeCSP2-qR	29.9594	29.9465	29.877	34.8808	34.9707	34.9685	29.9896	29.9582	29.9576	27.9828	27.9658	27.9128
SexeCSP4-qF	23.9409	23.8252	23.9534	33.8799	33.8836	33.9314	30.8373	30.9309	30.9055	29.9403	29.9383	29.8502
SexeCSP5-qF	32.9109	32.952	32.8126	32.9536	32.9599	32.8835	32.0028	32.039	31.9548	30.9546	30.8963	30.7657
SexeCSP8-qF	29.9193	29.9571	29.8148	32.1391	32.2155	31.9569	35.7508	35.9559	35.8935	34.9536	34.9203	34.7513
SexeCSP9-qF	24.957	24.9436	24.7893	26.8311	26.9577	26.7338	25.0275	25.0753	24.957	24.0198	24.0045	23.9524
SexeCSP10-qF	37.0094	36.5714	36.8328	34.1224	33.9581	34.13	36.9204	36.3628	36.9974	36.5046	36.1025	35.9768
SexeCSP12-qF	31.9296	31.9567	31.9045	26.8062	26.9564	26.8366	27.6984	27.9526	27.809	26.956	26.9595	26.7994
SexeCSP13-qF	23.9508	23.9492	23.971	24.9691	24.9522	24.8888	23.9471	23.8737	23.8341	22.9505	22.918	22.8484
SexeCSP17-qF	26.9464	26.9227	26.8807	20.9454	20.9483	20.9475	27.9464	27.9589	27.868	26.9509	26.8482	26.818
SexeCSP19-qF	27.8433	27.9536	27.8096	25.7499	25.9571	25.805	29.9589	29.9514	29.784	28.9597	28.8893	28.9011
SexeCSP23-qF	25.9575	25.8498	25.9622	32.8314	32.9512	32.7788	33.9363	33.9459	33.9289	34.9658	34.9573	34.9743
SexeCSP25-qF	36.6978	37.9881	36.9912	36.6257	36.9654	36.8413	36.9094	36.8891	36.9835	34.9561	34.8257	34.957
SexeCSP26-qF	21.8783	21.8938	21.9258	15.9237	15.8984	15.9026	21.9195	21.8258	21.809	20.9224	20.962	20.9034
SexeCSP28-qF	26.6152	26.7861	26.9624	23.6947	23.8599	23.9575	30.5526	30.9482	30.9566	26.727	26.8965	26.9598
SexeCSP30-qF	32.9559	32.9446	32.9212	31.9215	31.9996	31.961	32.9762	32.952	32.8957	32.9612	32.8954	32.8637
SexeCSP33-qF	26.9085	26.9553	26.8871	27.9129	27.9232	27.9604	28.9071	28.9502	28.9016	28.9369	28.892	28.9242
