# Supplementary material for: Sex- and stage-dependent expression patterns of odorant-binding and chemosensory protein genes in Spodoptera exempta
Source: PeerJ journal article supplement (doi:10.7717/peerj.12132), 2021-09-13
Supplement: Supplementary_material_3.pdf [file Supplementary_material_3.pdf]

|           | * | 20                     | *                                                      | 40                                 | *                 | 60           | *     | 80 | * | 100 | * | 120 |       |
|-----------|---|------------------------|--------------------------------------------------------|------------------------------------|-------------------|--------------|-------|----|---|-----|---|-----|-------|
| SexeOBP1  | : | -----                  | MNNLFVVYLVVLC                                          | -----                              |                   | A            | ----- |    |   |     |   |     | : 14  |
| SexeOBP2  | : | -----                  | MQKETNMLLAKIVK                                         | -----                              |                   | LL           | ----- |    |   |     |   |     | : 16  |
| SexeOBP3  | : | -----                  | MKLFLLFCTVFEV                                          | -----                              |                   | TNG          | ----- |    |   |     |   |     | : 15  |
| SexeOBP4  | : | -----                  | MKTCTFQFVCCILSIFLL                                     | -----                              |                   | F            | ----- |    |   |     |   |     | : 19  |
| SexeOBP5  | : | -----                  | MFKLSVLVCCLYFC                                         | -----                              |                   | ALTP         | ----- |    |   |     |   |     | : 18  |
| SexeOBP6  | : | -----                  | MSFSSIIWCAVIC                                          | -----                              |                   | I            | ----- |    |   |     |   |     | : 14  |
| SexeOBP7  | : | -----                  | MIFRFLLCFYLV                                           | -----                              |                   |              | ----- |    |   |     |   |     | : 12  |
| SexeOBP8  | : | -----                  | MLNSVFFLFTFGVLFLL                                      | -----                              |                   |              | ----- |    |   |     |   |     | : 16  |
| SexeOBP9  | : | -----                  | MTKVLFAIVLTMVTFG                                       | -----                              |                   | VTL          | ----- |    |   |     |   |     | : 19  |
| SexeOBP10 | : | -----                  | MLRINVAVAVFIVNLI                                       | -----                              |                   |              | ----- |    |   |     |   |     | : 16  |
| SexeOBP11 | : | -----                  | MDRKRCTCLLVIAMFL                                       | -----                              |                   |              | ----- |    |   |     |   |     | : 15  |
| SexeOBP12 | : | -----                  | MLRVGVAVAVFFANLV                                       | -----                              |                   |              | ----- |    |   |     |   |     | : 16  |
| SexeOBP13 | : | -----                  | MSKFTCIVFCIVAA                                         | -----                              |                   | SLT          | ----- |    |   |     |   |     | : 17  |
| SexeOBP14 | : | -----                  | MSKLSCIVVCALAM                                         | -----                              |                   | RL           | ----- |    |   |     |   |     | : 16  |
| SexeOBP15 | : | -----                  | MYKFACLILCVVAV                                         | -----                              |                   | SL           | ----- |    |   |     |   |     | : 16  |
| SexeOBP16 | : | -----                  | MTFEGQIAQYNMAKFI                                       | SLVFSLVIV                          | -----             | SL           | ----- |    |   |     |   |     | : 27  |
| SexeOBP17 | : | -----                  | MSTCTDLTRIGYVMLFW                                      | -----                              |                   | FLV          | ----- |    |   |     |   |     | : 20  |
| SexeOBP18 | : | -----                  | MKTLLVFAACVLLA                                         | -----                              |                   |              | ----- |    |   |     |   |     | : 14  |
| SexeOBP19 | : | -----                  | MRSFVVFCIVLV                                           | -----                              |                   |              | ----- |    |   |     |   |     | : 12  |
| SexeOBP20 | : | -----                  | MARRQRGAMFTETLPLFVILVA                                 | -----                              |                   |              | ----- |    |   |     |   |     | : 22  |
| SexeOBP21 | : | -----                  | MFHSGVVYFLVIA                                          | -----                              |                   | VFL          | ----- |    |   |     |   |     | : 16  |
| SexeOBP22 | : | -----                  | MYSINYFLFSIILFVMFNN                                    | -----                              |                   |              | ----- |    |   |     |   |     | : 19  |
| SexeOBP23 | : | -----                  | MEKILIFTFITL                                           | -----                              |                   | S            | ----- |    |   |     |   |     | : 13  |
| SexeOBP24 | : | -----                  | MAKVIYIVFFVVAV                                         | -----                              |                   | SLC          | ----- |    |   |     |   |     | : 17  |
| SexeOBP25 | : | -----                  | MSKFTCLVLCVVAV                                         | -----                              |                   | SL           | ----- |    |   |     |   |     | : 16  |
| SexeOBP26 | : | -----                  | MSVMRRSSEFLVVLFCFVSV                                   | -----                              |                   |              | ----- |    |   |     |   |     | : 19  |
| SexeOBP27 | : | -----                  | MWNCLVVFLAIC                                           | -----                              |                   |              | ----- |    |   |     |   |     | : 12  |
| SexeOBP28 | : | -----                  | MCLVKYHVLVLCVLLVGGYALNCRSSGGPKAEELKNIYKKCLKMQEGKNSSKGN | SAQDWKEPRIQIQRNDWDRGHSGSKENKNSRDDS | SRMGNKDKKGGSGMRDS |              |       |    |   |     |   |     | : 104 |
| SexeOBP30 | : | -----                  | MAAECEARASGLASAAAGAAGCCVAACATAPAPGPARPDPHMTCSRALALLA   | -----                              |                   |              | ----- |    |   |     |   |     | : 52  |
| SexeOBP31 | : | MKYKARRTLTQREKEKMSNQKT | NVLALILLILFS                                           | -----                              |                   | FAFYL        | ----- |    |   |     |   |     | : 39  |
| SexeOBP32 | : | -----                  | MMGIDAIHDNNVKIDKDTIITRNKLL                             | -----                              |                   | EKRSRGQKSDSN | ----- |    |   |     |   |     | : 38  |
| SexeOBP33 | : | -----                  | MVRPQKPNKSMFVIFV                                       | -----                              |                   |              | ----- |    |   |     |   |     | : 17  |
| SexeOBP34 | : | -----                  | MITHPSPMTSTLQLKHTI                                     | -----                              |                   |              | ----- |    |   |     |   |     | : 18  |
| SexeOBP35 | : | -----                  |                                                        | -----                              |                   |              | ----- |    |   |     |   |     | : -   |
| SexeOBP36 | : | -----                  | MLLIKVFSCILPFVVGL                                      | -----                              |                   | RIKRSS       | ----- |    |   |     |   |     | : 23  |

```

*           140           *           160           *           180           *           200           *           220           *           240
SexeOBP1 : -----GCSYGMT-----RAQVKKTMGVVKNQCM : 37
SexeOBP2 : -----IVVATCEAMT-----MKQIRNTGKMMRKTQ : 42
SexeOBP3 : -----IDAYVYKQEAEMKQ---ILNKV-PTINTYFTECI : 45
SexeOBP4 : -----GQSYGMT-----RQQLKNSGKLMKKSOM : 42
SexeOBP5 : -----YLASAMTAEQ-----KAQIHEHFEMVGKYCN : 44
SexeOBP6 : -----STVYATTKFR-----NKEGIEKCF : 33
SexeOBP7 : -----ELYGAHART-----DEEIKAWFFREGIDCN : 37
SexeOBP8 : -----SVEALS-----MEDLKQRYVDNILECS : 38
SexeOBP9 : -----SASTKEAKTTTMSD---QVNSIDVDVLAVMDMCN : 50
SexeOBP10 : -----SGWGQTTQDP-----RVGEMLLAKRYQMECI : 42
SexeOBP11 : -----ASGSDAMS-----RQQLKNSGKMLKKNOM : 39
SexeOBP12 : -----CGAQDSKDES-----LNEIVMLSKRYQLECI : 42
SexeOBP13 : -----KVSHAVTEEE-----KEAFRAALEPVIKCS : 43
SexeOBP14 : -----CCDFVASEDA-----NSVFHDVIRPMIFECA : 42
SexeOBP15 : -----SGVHATAEE-----KAAFIEAVKPHIQECS : 41
SexeOBP16 : -----NAVYAEED-----VESSSKEDHSIMDECA : 51
SexeOBP17 : -----KNVAALSDRE-----KSAIQKELTSVGLQCI : 46
SexeOBP18 : -----QALTDEQ-----KEKLLKHRSECL : 33
SexeOBP19 : -----AGVCAT-----EKGNKITSECI : 29
SexeOBP20 : -----VTHGGKDKPVF-----SDEIKEIIQTVHDECV : 49
SexeOBP21 : -----KNASAITDEL-----KAHIEAKFLTVGAEKI : 42
SexeOBP22 : -----CFVHSMT-----REQIKNSGKLIKKTCS : 42
SexeOBP23 : -----GFAHARISV-----MYAHDKLSDLVAQQCL : 38
SexeOBP24 : -----SIQADDDDD-----NSELIKINQKLLDCT : 42
SexeOBP25 : -----SGVHATAEE-----KAAFIEAVKPYVQECS : 41
SexeOBP26 : -----HAQSADD-----ESAIRDALRPYVLECA : 42
SexeOBP27 : -----CCVYGLT-----EEELKSEFTKLIKCN : 35
SexeOBP28 : RDDMMGRRDDMMTRGDDRSDNRKHRTDDRMGNGNDRSDNRGRMGNKNNRNDMNGERDNRYGRDDYFNGREDFPQSGEYGS DIGQYNNNYSTTQSTRRYKRERRPSNSGQRSQYNPNSHKIS : 226
SexeOBP30 : -----LVAVSQQATTGCKNCIMLGKEEKAMFRAHSDACV : 86
SexeOBP31 : -----TISFTPLTKEEQMERYNKMSIEDIEPFRKNLTECA : 73
SexeOBP32 : -----KNVDEKEPDWSYASFPKEISEHVENFKKNMSECL : 72
SexeOBP33 : -----VESKF-----GEIVKRTVIATAHTCM : 38
SexeOBP34 : -----LFQEKGNKIASECI : 32
SexeOBP35 : -----MTECL : 5
SexeOBP36 : -----GTMVDFTDPK-----VQGHLDALVRMAQSCV : 49

```

C

```

*      260      *      280      *      300      *      320      *      340      *      360
SexeOBP1 : PKNSV-TEEQVGRIEQGVFI---EDRNVMCYVA-CIYKTMQVV-KNDK-LDMSLILKQVDIL---YPPEL--KEPVKKSIAACIHSQ-----DNYSDLCEGVFYASKCLYEKDPNS----- : 136
SexeOBP2 : PKNNA-EDEKIDPIADGVFI---DEKEVKCYMA-CIMKMANTI-KNGK-LNYDAAIKQADLL---LPDDI--KEPAKEAITACRKVA-----DAHKDI CDASFHITKCIYNHNPGIFYFP-- : 145
SexeOBP3 : VETNE-DALQDETLLEEL---GVRNADELIN-CFFNKAGIIDGGGR-LSNGAARSILNLI---GVEDDE----ADQLIGKCTS-----IAGIDGSDMAFAIFKCFEDGVKK----- : 138
SexeOBP4 : PKNDV-TEEEIGDIEKGFVI---ENRNVMCYIA-CVYTMQVV-KNNK-LSYEAVIKQVDM---FPAEM--RDAVKAAATHCKETT-----KKYKDLCE SAYWTAKCMYDYDAENFVFP-- : 145
SexeOBP5 : KDSTMITADDIVNLRKAKVP---TGNAPCFLA-CVMKQIGVMDDSGM-LQKETALEMAKAV---FQDAEE-LKAIEDYLHSCSHINGESV-SDGAAGCDRAMLSYKCMTENASKFGFDI-- : 154
SexeOBP6 : EKFGV-SMTEKESSEKEDV---SSVDP-CFWA-CSFKTIGFLNSEGQ-YNPEITHSHFKTEELSFLGTAR-LDKLKDLIAKCDAALEKITGTDEKAECDRGLQLAKCYVEDVKDIFLDDSS : 146
SexeOBP7 : NEHPI-SPTMELSLKENKIP---NTNNAKCFVA-CVFKKTGMLDSKGM-FDADHSIAMIQKD---FADDPQKLESSKLLLETCKKVND EAV-SDGEKGCERSVLLHKCFVETAPELGIKLP- : 148
SexeOBP8 : KQYPI-DRADAEQLQNRVMP---DKDSAKCLFA-CVYKLAGVMNDQGE-MSVEGVNALSRYK---LAGDPEKLTQSEQFTEACKTVNDAPV-SDGTRGCDRAALIFKCTVEKSP EFNFV--- : 147
SexeOBP9 : DSYRI-DPSYIQALNESGSFIDETDKTPKCFIR-CVFFENVGIVSEDMQFNPARAAVIFAGE---RNGKP--MEDIADMTALCATD-----RQETPCCDRSYKFLRCLMSMEIERYEKS-- : 157
SexeOBP10 : EETRV-DPDI IAGIKNGRWSIPWTARPLAMKWALCVMMKRGLMTKEGV-YKL----- : 92
SexeOBP11 : NKIGV-TEDQVGSIDKGFVI---EDRKVMCYIA-CIYELTNVI-KNNK-LSYEASIKQIDLM---YPPDV--KESAKAAVEKCKDVQ-----KKYKDI CEVSFYAAKCMYEYKPEDFIFA-- : 142
SexeOBP12 : EETRV-DADI IATIKTGGWNIPSHDTFTVRQWALCVMMKRGLMSKEGV-YKLDVALKM-----VPKED--RDAAEKLIDSCLS-----QKALPADEIAFLFIKCFQRTSRKFPVSIFI : 146
SexeOBP13 : EEHGV-SEADIEAAKEAGSA---DAIKP-CFLG-CVMKKIEVLDSKGL-YDPETGLGKLRKF---VKDEDE-YAKFEEI AKKCLKVND EAV-SDAEAGCDRAKLLGCFLEHKVEMPF---- : 149
SexeOBP14 : EQYNL-TEEDLKKNRGPDAL---KKYPPCFVG-CVLKKNFIINDKGQ-YDADAGLTTIKTL---LPNKEY-FEKISGVFKECTSVNDKTV-SDGDAGCERAVLATT CYMEHKTAI IA---- : 148
SexeOBP15 : KEHGV-TPEDIKSAKEAGSA---DNINS-CFLS-CVYKKAEVVSIN----- : 81
SexeOBP16 : NKFGI-TLDEITVAFRSGNV---GALDP-CFWK-CCYGGTGLINKEGL-YDLDATLSFIKTK---FHDED--YTQFQETARMCEKVNKEDV-KDGEAGCERAAMLVSCFLKGRGDELLQ--- : 157
SexeOBP17 : QQHPL-SLSDIRAFRNKMIP---DGKKPKCFVA-CLFKKIGVMDDMGMI-SPMKAQENAKKV---FKDNQEHIKNVNEIMEKCSAVNQNT-MDGNKGC DRAKLAFNCLTENADKYGFDFDF : 158
SexeOBP18 : TETKV-DEQLVNKLKGGDYK---TDSEPLKKYALCMMMSELMTKD GK-FKKDVALAK-----VPNPAD-KPTVEKLIDACLA-----NKGNTPHQTAWNYVKCYHEKDPKHAI FL-- : 133
SexeOBP19 : KESGV-KSEVLAEAKGNIS---DDPAFKAFTF-CFFKKAGIVGEDGK-LNRDVALAK-----LPSGVD-KSEAEKLLDSCKS-----KTGKDAVDTVFEIFKCYQHGT KSH----- : 124
SexeOBP20 : AKTGV-AEEDITNCENGIFK---EDTKLKYMF-CLLEEASLVDDDDT-VDYDMLVSL-----IPDEY--YERTTKMIFACKHLD-----SPDKDRCQRAFEVHKCSYEKDPDLYFLF-- : 149
SexeOBP21 : KEHPL-TIEDLAAFKNRVFP---DGENAGCFSA-CIFNKLGLFDDKGT-LSHLTAL ENAKKV---FEDEEE-LGSIEKFLTS CAKVND EAV-SDGEKGCERAKLAYNCFIENYQLGFDLEF : 153
SexeOBP22 : AKHDL-TEDEVKDVDKGKFL---ETKDFMCIYIA-CVYKMGQSV-KGST-INHDMMLRQVDMM---FPNDM--KAPVKAIEHCRPVA-----KNYKDLCEASYWTAKCIYDFDSANFMFP-- : 145
SexeOBP23 : -----SEMPKKNKRIEI---QESDEPCIIF-CVLKKGFIISASGV-INLDIYRKRQV-----IAHQLDQKTSIMDYGGSCMENA EAT--QHKQDVCKKAKVFNDCTHLYRILLM----- : 135
SexeOBP24 : KKF DI-SVEQFHETIESGDA---YAVAP-CFWS-CCFKKVGVINSEGQ-YDL DATLDSLKKI---FSTWE--YENVEDIVKCKEKNELV--SDGNTGCDRSISLAACIFENWKKINPNKFS : 150
SexeOBP25 : KEHGV-TPEDIKSAKAAGNA---DGINS-CFLS-CVYKKAEVINEKGE-YDV----- : 86
SexeOBP26 : EEFGI-TEEEFEEAKKASA---ADIDP-CFMS-CFLKKAQFFDDQ GK-FDVDSTMAFAKEN---LSSEPM-MKFVEAVGDECGKS----- : 117
SexeOBP27 : KDGQV-DMTELVKLQNYVVP---TKQTTKCVLA-CAYKAAEVMNAKGE-YDIEHAYKVAEKM---KNGDEKRLVNAKKMADLCVKVNEESV-SDGDKGC DR AAMI FKCTVENAPKFGFKL-- : 145
SexeOBP28 : GYEDTFRSDERNTTENSSK---ETDNKSCALH-CFLENLEMTGEDGM-PDRYLVTHAITKD---VKNEDL-RDFLOESIEECFQILDN---ENTEDKCEFSKNLLICLSEKGRANCDDWKD : 336
SexeOBP30 : AASRV-APRLVEAMLQGLL---DDPALRRHVY-CVLLKCKLISKDGK-LQKAAVLGK-----MAARPD-AKNATKVLES CAD-----QTGDTPEDLAWNLFRCGYDKKALLFDYMP T : 187
SexeOBP31 : RQVKA-SAADVENFLKRIPQ---ASLQKCFVA-CILKRTSII-KNNK-ISRKQLEANRAV---YGEDSEVMSRLKIAVSECSKAV-----EGIFEICEYASVFND CMHIKMEHILEQVTM : 180
SexeOBP32 : KEVQS-SDKRPVKRLSPKME---SPVHGECLIA-CVLKRNQVI-IHGK-VNKDNLIALVSKF---YSKDTRLMKKLEKNLDRCIEMS-----VRAQDDCTLASLLNDCTNDLMASNKHKL-- : 177
SexeOBP33 : DHVNA-TTKDLENLREPP---YPETSACIVK-CLLEKIGVV-KGNR-YSKMGFMTAVTPL---VFTNKKKLEHMKTVSENCDKEVN---HKHETPCQLGNEVTTIFKYAPELHFKS-- : 143
SexeOBP34 : KESGV-KSDVLAEAKGNLG---DDPAFKEFTY-CFFKKVGIVGEDGK-LNRDVAIAK-----LPSGVD-KAEAEKLLDSCKS-----KTGKDAVETVYEIFKCYQHGT KSHIMFAS- : 132
SexeOBP35 : KEVQA-NDKRPVKRLSPKME---SPVHGECLIA-CVLKRNQVI-INGK-VNKENLITLVSKF---YSKDTRLMKKLEKNLDRCIEMS-----VRAQDDCTLASQLNDCTNDLMASNKQKIMV : 112
SexeOBP36 : IKVRA-TPKDVRA YFTNSSP---VSRSGQCFAA-CMLEQSDVI-NHGK-VNRELLVHLASLV---NGKQSRVVRKLN TVSRCLDSI-----DGMSDRCQLASTYNDCLNENMIEFAFPLDI : 156

```

c c

c

c

```

      *          380          *
SexeOBP1 : ----- : -
SexeOBP2 : ----- : -
SexeOBP3 : ----- : -
SexeOBP4 : ----- : -
SexeOBP5 : ----- : -
SexeOBP6 : K----- : 147
SexeOBP7 : ----- : -
SexeOBP8 : ----- : -
SexeOBP9 : ----- : -
SexeOBP10 : ----- : -
SexeOBP11 : ----- : -
SexeOBP12 : ----- : -
SexeOBP13 : ----- : -
SexeOBP14 : ----- : -
SexeOBP15 : ----- : -
SexeOBP16 : ----- : -
SexeOBP17 : ----- : -
SexeOBP18 : ----- : -
SexeOBP19 : ----- : -
SexeOBP20 : ----- : -
SexeOBP21 : ----- : -
SexeOBP22 : ----- : -
SexeOBP23 : ----- : -
SexeOBP24 : DSA----- : 153
SexeOBP25 : ----- : -
SexeOBP26 : ----- : -
SexeOBP27 : ----- : -
SexeOBP28 : ----- : -
SexeOBP30 : NVATSESDNNS----- : 198
SexeOBP31 : ERRMEAI SKMTSDPDQWGEEDLLKLVKDEL : 212
SexeOBP32 : ----- : -
SexeOBP33 : ----- : -
SexeOBP34 : ----- : -
SexeOBP35 : NY----- : 114
SexeOBP36 : AEEAVRKMPFH LIQPNLPQEVR SMPY----- : 182

```
