# Supplementary material for: Sex- and stage-dependent expression patterns of odorant-binding and chemosensory protein genes in Spodoptera exempta
Source: PeerJ journal article supplement (doi:10.7717/peerj.12132), 2021-09-13
Supplement: Supplementary_material_6.pdf [file Supplementary_material_6.pdf]

```

SexeCSP1 : --MK--LVIILALVAVAVARPDDG--GT--YDSKYDNFNVDDELVGNARLLKSY-----AHCFLDDGK-CTPE-GNDFKKWIPEATTTSCGKCSEKOKA : 83
SexeCSP2 : --MNF-LVLSIVVSMFAFVAAET-----YTDYDHINIDEIENRLLVPY-----IKCTLDQGR-CTPE-GRELKGGIKCCLK----- : 69
SexeCSP3 : --MK--LVIILALVAVALARPDDG--GF--YDTKYDNFNADELIENERLLKSY-----AHCFLGDGK-CTPE-GNDFKKWIPEATTTSCGKCSEKOKA : 83
SexeCSP4 : --MKG-ILVLCLFVAAVSCKPET-----YDTRYDNFDVEALVGNVRLLTAY-----GHCFLGTGP-CTPE-GSDFKKTIPDALRTGCAKCSPRORH : 81
SexeCSP5 : MMTKS-FISMMLLIYLTIQSNATE--SST-YTTYDGIDLDEILNNDRLLTGY-----VNCLMDLGP-CTAD-GKELKKNLPDAIENDCKKCTERORE : 87
SexeCSP6 : --MQV-IVVLVVVCMGLVAGLHVQ-----AGPQMSDAQLEQILADRSTMQRH-----IKCALAEGP-CDPV-GRRLRTLAPLVLRGACPQCSVQETR : 82
SexeCSP7 : --MKV-VFLVCLAAVVYGEQ-----YTDKYDNIDLDEILHNEKILQSY-----VNCCLDQGK-CTPD-GKELKSHIKEALENRCGKCTPAOKD : 79
SexeCSP8 : --MNA-LLIAVFAVAAPLAFG-----YDEKYDKLDVVKILGDDAVFTSY-----INCLMDKGP-CSVESHADFRQLLPEVISTACAKCNAIQRQ : 80
SexeCSP9 : -----MVDAIETGCSKCTEAQEQ : 18
SexeCSP10 : --MKS-MIVLCVLSVAALVVARPD--DSH-YTDYDNVNLDEILSNRRLVPY-----VKCILDQGK----- : 56
SexeCSP11 : --MKV-ALLTLCFALGVLAQDM-----YENANDNFDISEVLGNERLLNSY-----AKCLLNKGP-CTPE-VKQVKDKLPEALETRCAKCTDKOKQ : 80
SexeCSP12 : --MRV-VLFICALVHLVVGQDVNDMVNMPKYDSRYDYLDVDAIFTNKRLVRNY-----VDCLINSVR-CTPE-GKALKRILPEALRTKCVRCTEROKR : 88
SexeCSP13 : -----MERGK-CSPE-GKELKEHLVDAIETGCSKCTEAQEK : 34
SexeCSP14 : --MKV-LVALSVFVVLAAAAPLTK--D--ELATLEAFDYDSLFADEEKRVV-----FDCLLDKGD-CGPY--KQIVDLSMKTILSNCAECSPSOKA : 82
SexeCSP15 : --MKC-IYVLSALLVFAAVQAEDK-----YSTENDDLIDAVVADVDALRGF-----VGC FMDSVT-CHAV-AADFKKDLPEAVATSCSKCTEAQKH : 82
SexeCSP16 : MQIKY-ALVLCVAAVVAQET-----QRPPVSDTALDDALQDKRFIQRQ-----LKCALGEGP-CDPI-GKRLKTLAPLVLRGACPQCSVQETK : 81
SexeCSP17 : --MRV-LVALSCLVVVFAADK-----YNAKYDNFDVDTLITNDRLLKAY-----INCFLEKGR-CTPE-GSDFKSEYYCYVDY----- : 69
SexeCSP18 : --MKH-ILVALVVTIAVVKAQET-----YGTEYDNVNGEAIVSDDKQFQGF-----VDCFTGAAP-CNEP-AAAFKRVLPFAIVQACGKCNPAQKH : 81
SexeCSP19 : --MKS-FIVVCLFGLAAIAMARPN--SST-YTDYDNVNLDEILGNRRLTPY-----VKCILDGK-CTAD-GKELKSHIREALEQNC AKCTDAORR : 85
SexeCSP20 : --MRSWLLCLCVLTVVVSCYSQA-----NRYENFNPD AIVQNDRI LAY-----YKCVMDKGP-CTRD-GKNFKRVLPETLATA CGRCNPKOKT : 80
SexeCSP21 : --MKS-ILVLCLLVAAVSCRPE-----YDTRFDNFDVEALVGNVRLLTAY-----GHCFLGNGP-CTPE-GSAFKKTIPDALRTGCGKCSPKORH : 81
SexeCSP22 : --MKS-ILVLCLLVAAVSCKPET-----YDTRYDNFDVESLVGNVRLLTAY-----GHCFLGNGP-CTPE-GSDFKKTIPDALRTGCGKCSPKORH : 81
SexeCSP23 : --MKH-FLVLLIATIAVVT AQET-----YGTQYDNVNGEAIVSDDKQFQSF-----VDCFRGDAP-CNEI-AAAFKRVLPFAIVEGCAKCNVOKH : 81
SexeCSP24 : MWVQA-IPYFIVVHVVMGNKEVVK--ISREFSEGVSQSMGFKVIYGEDLTIINQVVSEAEKNSASKNKVHLNEAIKPLPAQDVKCLMSVDRYCSKE-MGQMKSVLIQAVKEDCAKCSVQOKD : 118
SexeCSP25 : --MKLI IAVVLCMVAVAWSRPAST-----YTDKWDNINVDEILESQRLLKGY-----VDCLLDGR-CTPD-GKALKETLPDALEHECSKCTEKOKK : 83
SexeCSP26 : --MKV-VILVCLAAVAYAPHPES--T--YTDKYDTIDLDEILSNRRLVPY-----VKCLDEGK-CSPE-GKELKSHIKEALENCKGKCTKAQON : 83
SexeCSP27 : --MKV-LVLSVFLALAAAAPPKP--ITKEELAILEAFDYDAVFANEESRCLI-----FDCLLDKGD-CGPY--KVVVELSKKSMYDECALCSPTOMA : 85
SexeCSP28 : --MKC-IYVLSVLLVFAGVLAEDK-----YSTENDDLIDAVVADLDSLKGF-----VGC FMDSIT-CHAV-AADFKKDIPEAVSTHCAKCTDAORH : 82
SexeCSP29 : -----MDAVT-CHAV-AADFKKDLPEAVATSCSKCTDAQKH : 34

```

m c c k c c q

```

*      140      *      160      *      180      *      200      *      220      *      240
SexeCSP1 : LVAKTIQAIKDKLPAEYEALIKKHDPENKHQGKL-QEFLQKYSH----- : 126
SexeCSP2 : ----- : -
SexeCSP3 : LIAKTIKAIKDKLPSEYEALIKKHDPENKHHDDL-DKFLQKYSH----- : 126
SexeCSP4 : LIRVVANGFQEKTPALWKQLVQKEDPHGQYKETF-TRFINARD----- : 123
SexeCSP5 : GADRVCHYLIDNKPEDWTKLEEKYKSDGSYRIKYLASKLTKDEKELNATKSSDNTNVSKE----- : 148
SexeCSP6 : QIRRTLAFVQRNYPWEWAKIVRQYG----- : 107
SexeCSP7 : GTRKVLTHLINHEPEMWNQLCEKYDAEGKYRKMV-EDEYKSVKH----- : 122
SexeCSP8 : NVRKTVKALSEKRPDEFAQFRAKFDPKSEYEKDF-MAFVIGTD----- : 122
SexeCSP9 : GAAKVIEHLIKNELDIWHELTDKFDPTGKWRKTY-EDRAKAKGIHIPE----- : 65
SexeCSP10 : ----- : -
SexeCSP11 : MGKTLA----- : 86
SexeCSP12 : TAVKVIKRLKNEYPDDEWSKLASRWDPTGDFTRYF-EEFLAKEHYNSIPGSGSALPTSSPLAPPRVPPSPATTPTPGPTSTPPRPLILNRFGDDGELMMGSPSSAGITPRPMTQATTKPS : 209
SexeCSP13 : GAYKVIEHLIQNELDTWHELTDKYDSSGKWRKTY-EDRAKANGIIPE----- : 81
SexeCSP14 : KYDHVLLKLLKDNYSFFNEFMQKTAAKKEKH----- : 113
SexeCSP15 : IFHRFLLGLKQKLPADYEAFFKKKFDPEGQHFHAL-EANVSNS----- : 123
SexeCSP16 : QIQ----- : 84
SexeCSP17 : ----- : -
SexeCSP18 : LVRLFLEAYSCKSPQEYEFKDLFDPERK----- : 110
SexeCSP19 : GTRRVLGHLINEEVEYWNRLKAKYDPQSKYTLKY-EQDLRKLKA----- : 128
SexeCSP20 : IVRLLLLGIRAKSEPRFLELLDKYNPDRSNRDAL-YAFLVTGA----- : 122
SexeCSP21 : LIRVVVQGFQNKTPGLWQDLVHKQDPNGQYKEIF-TRFLNGRD----- : 123
SexeCSP22 : LIRVVVQGFQNKTPGLWQDLVHKQDPNGQYKEIF-TRFLNARD----- : 123
SexeCSP23 : LARLFLEAYSCKMPQEYEFKDLFDPERKYFPKF-EASVAGF----- : 122
SexeCSP24 : EAGKVIASMAHDPVAWKVFLTRYDGIKKVQRILG----- : 153
SexeCSP25 : SSDKVIRHLVNKRFDLWQELSGKYDPENIYQERY-KTQLDAVKRH----- : 127
SexeCSP26 : GTRKVIKHLINHEPEFWKQLCDKYDPQRKYTTAY-EEELKTL----- : 124
SexeCSP27 : KYDRVLKLLHDDYETFYNELIKKVASEKE----- : 114
SexeCSP28 : IFHKFLLGLKQKLPDSYDAFKNKYDPEGIHFHSL-EAAVAKF----- : 123
SexeCSP29 : IFHRFLLGLKQKLPADYEAFFKKKFDPEGLHFHTL-EANVANS----- : 75

```

```

*           260           *           280           *           300           *           320
SexeCSP1 : ----- : -
SexeCSP2 : ----- : -
SexeCSP3 : ----- : -
SexeCSP4 : ----- : -
SexeCSP5 : ----- : -
SexeCSP6 : ----- : -
SexeCSP7 : ----- : -
SexeCSP8 : ----- : -
SexeCSP9 : ----- : -
SexeCSP10 : ----- : -
SexeCSP11 : ----- : -
SexeCSP12 : TTMKTPSTRPVPPRPTMMTWAGAASNTQATRFPLRPVSDISPPYSTAITLIDQIGYKIIKTTELVTDILRNTVRAVVGR : 288
SexeCSP13 : ----- : -
SexeCSP14 : ----- : -
SexeCSP15 : ----- : -
SexeCSP16 : ----- : -
SexeCSP17 : ----- : -
SexeCSP18 : ----- : -
SexeCSP19 : ----- : -
SexeCSP20 : ----- : -
SexeCSP21 : ----- : -
SexeCSP22 : ----- : -
SexeCSP23 : ----- : -
SexeCSP24 : ----- : -
SexeCSP25 : ----- : -
SexeCSP26 : ----- : -
SexeCSP27 : ----- : -
SexeCSP28 : ----- : -
SexeCSP29 : ----- : -

```
